# Supplementary material for: Graft-versus-host disease and relapse/rejection-free survival after allogeneic transplantation for idiopathic severe aplastic anemia: a comprehensive analysis from the SAAWP of the EBMT
Source: PubMed Central journal article supplement — Haematologica. 2023 Mar 23;108(9):2305–15. doi: 10.3324/haematol.2022.281876 (PMC10483355; doi:10.3324/haematol.2022.281876), 2023-03-23
Supplement: 2022_281876_DEVILLIER_SUPPL.pdf [file 2022_281876_DEVILLIER_SUPPL.pdf]

# Graft-versus-host disease and relapse/rejection-free survival after allogeneic transplantation for idiopathic severe aplastic anemia: a comprehensive analysis from the SAAWP of the EBMT

Raynier Devillier,<sup>1</sup> Dirk-Jan Eikema,<sup>2</sup> Carlo Dufour,<sup>3</sup> Mahmoud Aljurf,<sup>4</sup> Depei Wu,<sup>5</sup> Alexei Maschan,<sup>6</sup> Alexander Kulagin,<sup>7</sup> Constantijn J. M. Halkes,<sup>8</sup> Matthew Collin,<sup>9</sup> John Snowden,<sup>10</sup> Cécile Renard,<sup>11</sup> Arnold Ganser,<sup>12</sup> Karl-Walter Sykora,<sup>12</sup> Brenda E. Gibson,<sup>13</sup> Johan Maertens,<sup>14</sup> Maija Itäla-Remes,<sup>15</sup> Paola Corti,<sup>16</sup> Jan Cornelissen,<sup>17</sup> Martin Bornhäuser,<sup>18</sup> Mercedes Colorado Araujo,<sup>19</sup> Hakan Ozdogu,<sup>20</sup> Antonio Risitano,<sup>21</sup> Gerard Socie<sup>22</sup> and Regis Peffault de Latour<sup>22</sup>

<sup>1</sup>Paoli Calmettes Institute, Marseille, France; <sup>2</sup>EBMT Statistical Unit, Leiden, the Netherlands; <sup>3</sup>IRCCS Gaslini Children's Research Hospital, Genova, Italy; <sup>4</sup>King Faisal Specialist Hospital and Research Center, Riyadh, Saudi Arabia; <sup>5</sup>First Affiliated Hospital of Soochow University, Suzhou, China; <sup>6</sup>Federal Research Center for Pediatric Hematology, Moscow, Russia; <sup>7</sup>RM Gorbacheva Research Institute, Pavlov University, St Petersburg, Russia; <sup>8</sup>Leiden University Hospital, Leiden, the Netherlands; <sup>9</sup>Adult HSCT Unit, Newcastle, UK; <sup>10</sup>Sheffield Teaching Hospitals, NHS Trust, Sheffield, UK; <sup>11</sup>Institut d'Hématologie et d'Oncologie Pédiatrique, Lyon, France; <sup>12</sup>Hannover Medical School, Hematology Department, Hemostasis, Oncology and Stem Cell Transplantation, Hannover, Germany; <sup>13</sup>Royal Hospital for Children, Glasgow, UK; <sup>14</sup>University Hospital Gasthuisberg, Leuven, Belgium; <sup>15</sup>Turku University Hospital, Turku, Finland; <sup>16</sup>Centro Trapianti di Midollo Osseo, Monza, Italy; <sup>17</sup>Erasmus MC, Cancer Institute, Rotterdam, the Netherlands; <sup>18</sup>Universitätsklinikum Dresden, Dresden, Germany; <sup>19</sup>Hospital U. Marqués de Valdecilla, Santander, Spain; <sup>20</sup>Baskent University Hospital, Adana, Turkey; <sup>21</sup>Federico II University of Naples, Napoli, Italy and <sup>22</sup>Hopital St. Louis, Paris, France

**Correspondence:** R. Devillier  
[devillierr@ipc.unicancer.fr](mailto:devillierr@ipc.unicancer.fr)

**Received:** August 1, 2022.

**Accepted:** March 15, 2023.

**Early view:** March 23, 2023.

<https://doi.org/10.3324/haematol.2022.281876>

©2023 Ferrata Storti Foundation

Published under a CC BY-NC license

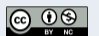

**Supplementary Figure 1:** Flowchart of patient selection from the DQI

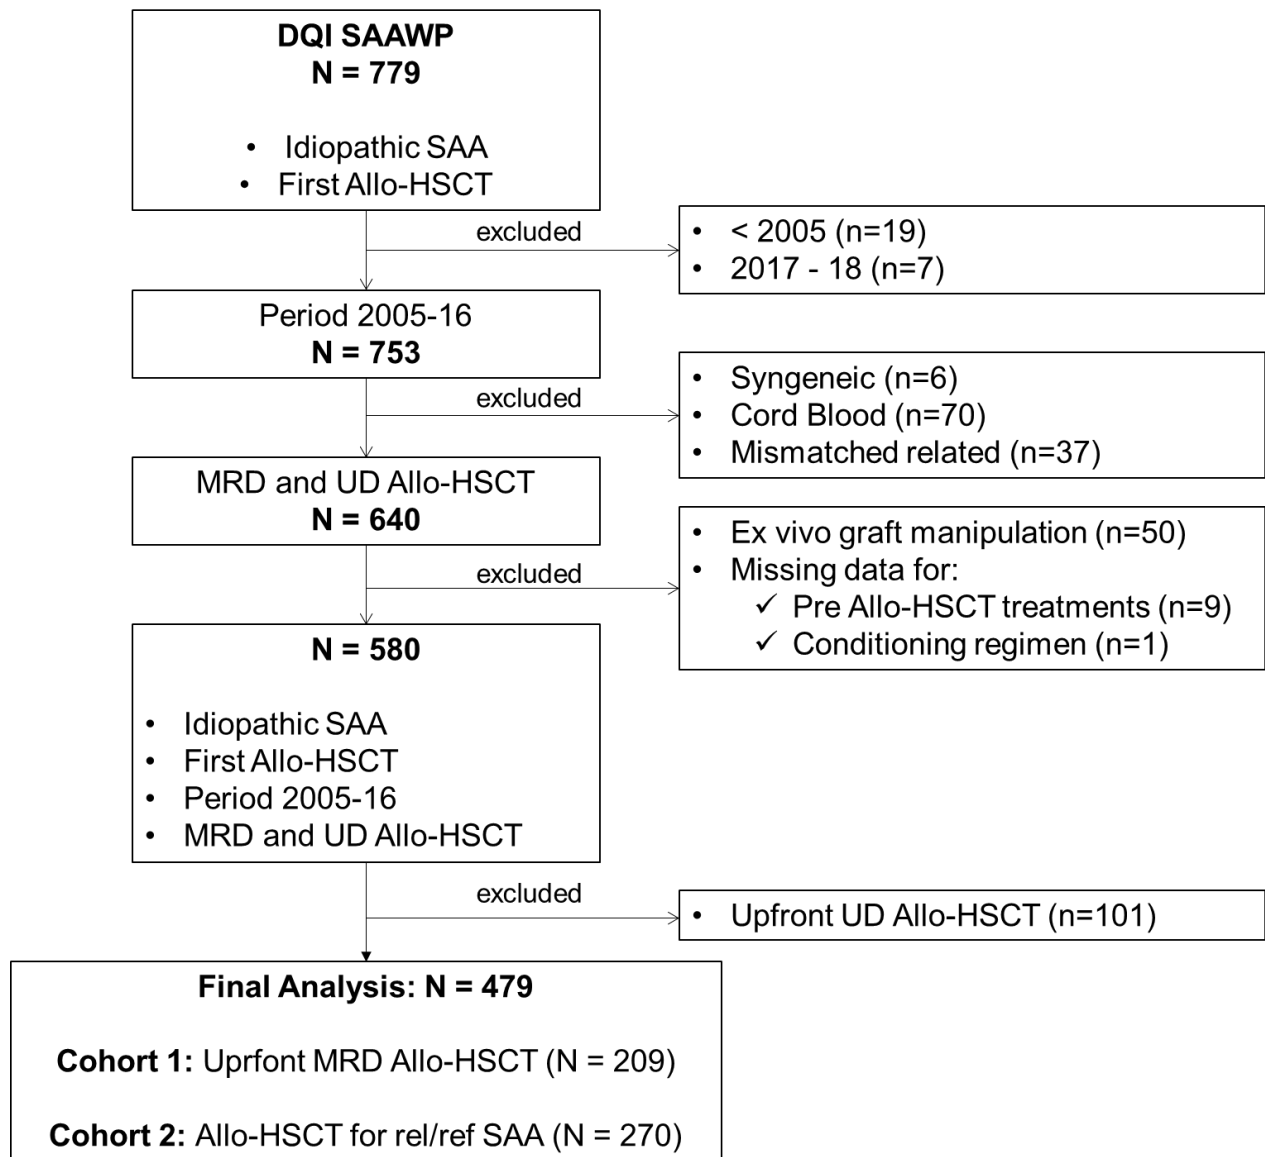

**Supplementary Figure 2:** Specific case of multistate model for evaluating the competing risks of first event for GRFS failures<sup>1</sup>. All patients entered the model at the time of Allo-HSCT in the initial state “GRFS” and may subsequently transit into one of the 4 event states that corresponds to the above mentioned relevant events for GRFS (i.e. GF, aGVHD, cGVHD and death). Hazard ratio (HR) for each of the 4 state transitions allowed by the model were computed using a Cox model including transition-specific covariates: age (continuous), time from diagnosis to Allo-HSCT (6-month cutoff), CMV serostatus (D-/R- vs. other), graft source (BM vs. PBSC), in vivo T-cell depletion with ATG or alemtuzumab (yes vs. no), low dose TBI (yes vs. no, only for the rel/ref cohort), and donor type (MRD vs. UD, only for the rel/ref cohort). In addition, the same model was used to perform dynamic prediction<sup>2</sup>, providing predicted probabilities of state occupancy in the next 2 years given a patient still event free at different time points after Allo-HSCT (i.e. probability of state occupancy at 2 years +  $k$  months starting from  $k$  months after Allo-HSCT,  $k$  ranging from 1 to 12 months). The table below shows the transition matrix from GRFS to event states for both the upfront and rel/ref cohorts.

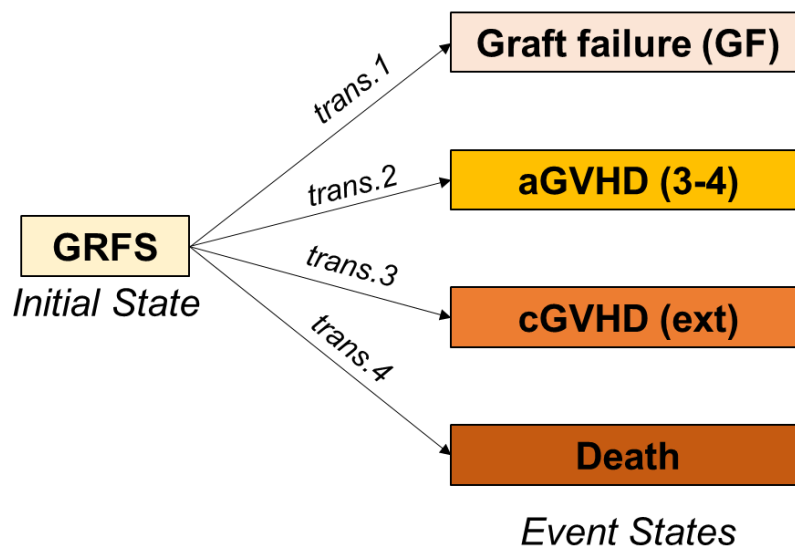

|                       | Total entering | No transition GRFS | Trans. 1<br>GRFS to GF | Trans. 2<br>GRFS to aGVHD | Trans. 3<br>GRFS to cGVHD | Trans. 4<br>GRFS to Death |
|-----------------------|----------------|--------------------|------------------------|---------------------------|---------------------------|---------------------------|
| <b>Upfront Cohort</b> | 209            | 164                | 10                     | 5                         | 11                        | 19                        |
| <b>Rel/Ref Cohort</b> | 270            | 164                | 27                     | 17                        | 14                        | 48                        |

- 1 Putter H, Fiocco M, Geskus RB. Tutorial in biostatistics: competing risks and multi-state models. *Stat Med* 2007; 26: 2389–2430.
- 2 Nicolaie MA, van Houwelingen JC, de Witte TM, Putter H. Dynamic prediction by landmarking in competing risks. *Stat Med* 2013; 32: 2031–2047.

**Supplementary Figure 3:** Overall survival after Allo-HSCT in the upfront and the rel/ref cohorts.

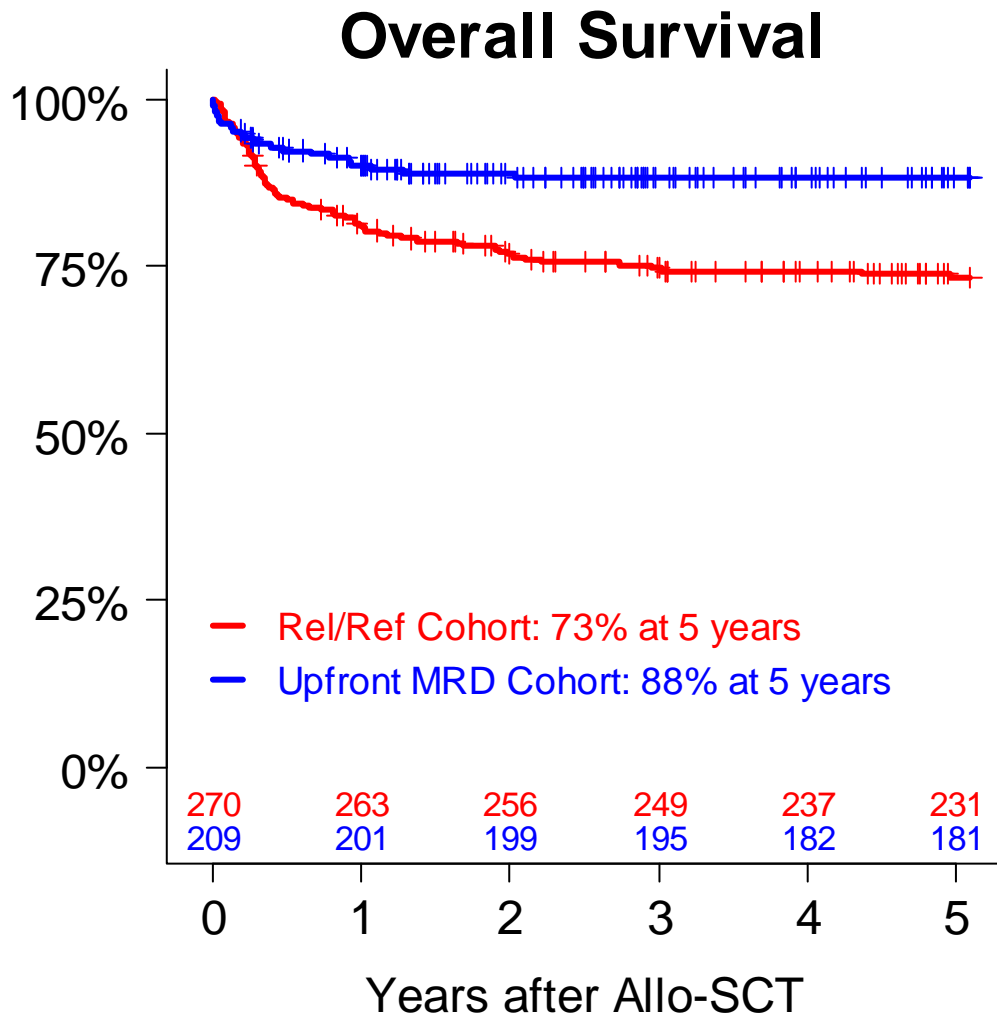

**Supplementary Table 1:** Univariate analyses of GRFS and cumulative incidences of first cause of failure of GRFS in the upfront MRD Allo-HSCT cohort

| Upfront MRD Allo-HSCT<br>(n=209)   | N   | time | GRFS |         | p                | Cumulative incidence of causes for GRFS failure |         |                |    |                      |              |       |        |       |     |         |              |
|------------------------------------|-----|------|------|---------|------------------|-------------------------------------------------|---------|----------------|----|----------------------|--------------|-------|--------|-------|-----|---------|--------------|
|                                    |     |      | %    | 95%CI   |                  | Graft Failure                                   |         | aGVHD (III-IV) |    | cGVHD<br>(extensive) |              | Death |        | p     |     |         |              |
|                                    |     |      |      |         |                  | %                                               | 95%CI   | p              | %  | 95%CI                | p            | %     | 95%CI  | p     | %   | 95%CI   | p            |
| <b>All patients</b>                | 209 | 5y   | 77%  | (71-84) |                  | 5%                                              | (3-10)  |                | 2% | (1-6)                |              | 6%    | (3-11) |       | 9%  | (6-14)  |              |
| <b>Age</b>                         |     |      |      |         |                  |                                                 |         |                |    |                      |              |       |        |       |     |         |              |
| ≤ 20                               | 96  | 5y   | 81%  | (73-90) | 0.114            | 3%                                              | (1-10)  | 0.557          | 0% | (NA-NA)              | <b>0.040</b> | 8%    | (3-16) | 0.720 | 8%  | (4-16)  | <b>0.006</b> |
| 21-40                              | 92  | 5y   | 76%  | (67-86) |                  | 8%                                              | (4-18)  |                | 5% | (2-13)               |              | 5%    | (2-14) |       | 5%  | (2-13)  |              |
| > 40                               | 21  | 5y   | 64%  | (46-90) |                  | 0%                                              | (NA-NA) |                | 0% | (NA-NA)              |              | 5%    | (1-34) |       | 31% | (16-61) |              |
| <b>Graft Source</b>                |     |      |      |         |                  |                                                 |         |                |    |                      |              |       |        |       |     |         |              |
| BM                                 | 151 | 5y   | 77%  | (70-84) | 0.673            | 6%                                              | (3-12)  | 0.663          | 1% | (0-5)                | 0.106        | 8%    | (4-14) | 0.205 | 8%  | (5-14)  | 0.313        |
| PBSC                               | 58  | 5y   | 79%  | (69-91) |                  | 2%                                              | (0-14)  |                | 5% | (2-16)               |              | 2%    | (0-14) |       | 11% | (5-24)  |              |
| <b>In vivo T-cell depletion</b>    |     |      |      |         |                  |                                                 |         |                |    |                      |              |       |        |       |     |         |              |
| yes                                | 169 | 5y   | 79%  | (73-86) | 0.130            | 3%                                              | (1-8)   | <b>0.048</b>   | 2% | (1-6)                | 0.844        | 6%    | (3-11) | 0.398 | 9%  | (6-15)  | 0.905        |
| no                                 | 34  | 5y   | 66%  | (51-85) |                  | 13%                                             | (5-34)  |                | 3% | (0-20)               |              | 9%    | (3-27) |       | 9%  | (3-26)  |              |
| <b>CMV serostatus</b>              |     |      |      |         |                  |                                                 |         |                |    |                      |              |       |        |       |     |         |              |
| D-/R-                              | 53  | 5y   | 85%  | (74-97) | <b>0.026</b>     | 7%                                              | (2-26)  | 0.572          | 2% | (0-13)               | 0.683        | 5%    | (1-18) | 0.426 | 2%  | (0-14)  | 0.052        |
| others                             | 137 | 5y   | 74%  | (67-82) |                  | 5%                                              | (3-11)  |                | 3% | (1-8)                |              | 7%    | (4-14) |       | 10% | (6-17)  |              |
| <b>Time from diag to Allo-HSCT</b> |     |      |      |         |                  |                                                 |         |                |    |                      |              |       |        |       |     |         |              |
| ≤ 6 months                         | 162 | 5y   | 82%  | (76-89) | <b>&lt;0.001</b> | 4%                                              | (2-10)  | 0.122          | 2% | (1-6)                | 0.348        | 6%    | (3-11) | 0.616 | 7%  | (4-12)  | <b>0.005</b> |
| > 6 months                         | 47  | 5y   | 61%  | (47-78) |                  | 9%                                              | (3-23)  |                | 4% | (1-17)               |              | 8%    | (3-26) |       | 18% | (9-33)  |              |

**Supplementary Table 2:** Univariate analyses of GRFS and cumulative incidences of first cause of failure of GRFS in the rel/ref cohort

| Rel/Ref cohort (n=270)             | N   | time | GRFS |         | p            | Cumulative incidence of causes for GRFS failure |        |                |        |                   |       |        |         |     |         |              |   |  |  |  |
|------------------------------------|-----|------|------|---------|--------------|-------------------------------------------------|--------|----------------|--------|-------------------|-------|--------|---------|-----|---------|--------------|---|--|--|--|
|                                    |     |      | %    | 95%CI   |              | Graft Failure                                   |        | aGVHD (III-IV) |        | cGVHD (extensive) |       | Death  |         | p   | p       | p            | p |  |  |  |
|                                    |     |      |      |         |              | %                                               | 95%CI  | %              | 95%CI  | %                 | 95%CI | %      | 95%CI   | %   | 95%CI   |              |   |  |  |  |
| <b>All patients</b>                | 270 | 5y   | 61%  | (55-67) |              | 9%                                              | (6-13) | 6%             | (4-10) | 5%                | (3-9) | 18%    | (14-23) |     |         |              |   |  |  |  |
| <b>Age</b>                         |     |      |      |         |              |                                                 |        |                |        |                   |       |        |         |     |         |              |   |  |  |  |
| ≤ 20                               | 95  | 5y   | 72%  | (63-82) | <b>0.003</b> | 7%                                              | (3-15) | 5%             | (2-12) | 0.635             | 4%    | (2-11) | 0.864   | 12% | (7-20)  | <b>0.007</b> |   |  |  |  |
| 21-40                              | 92  | 5y   | 64%  | (55-75) |              | 11%                                             | (6-20) | 5%             | (2-13) |                   | 6%    | (3-14) |         | 14% | (8-23)  |              |   |  |  |  |
| > 40                               | 83  | 5y   | 46%  | (36-58) |              | 10%                                             | (5-19) | 8%             | (4-17) |                   | 6%    | (3-14) |         | 30% | (21-42) |              |   |  |  |  |
| <b>Graft Source</b>                |     |      |      |         |              |                                                 |        |                |        |                   |       |        |         |     |         |              |   |  |  |  |
| BM                                 | 205 | 5y   | 60%  | (54-68) | 0.615        | 10%                                             | (7-15) | 6%             | (3-10) | 0.595             | 6%    | (3-10) | 0.855   | 18% | (13-24) | 0.876        |   |  |  |  |
| PBSC                               | 65  | 5y   | 64%  | (53-77) |              | 6%                                              | (2-16) | 8%             | (3-18) |                   | 5%    | (2-14) |         | 18% | (10-30) |              |   |  |  |  |
| <b>In vivo T-cell depletion</b>    |     |      |      |         |              |                                                 |        |                |        |                   |       |        |         |     |         |              |   |  |  |  |
| yes                                | 225 | 5y   | 64%  | (58-71) | 0.061        | 8%                                              | (5-13) | 4%             | (2-8)  | <b>0.006</b>      | 5%    | (3-9)  | 0.658   | 16% | (14-24) | 0.633        |   |  |  |  |
| no                                 | 45  | 5y   | 49%  | (36-66) |              | 13%                                             | (6-28) | 16%            | (8-31) |                   | 7%    | (2-20) |         | 15% | (8-31)  |              |   |  |  |  |
| <b>CMV serostatus</b>              |     |      |      |         |              |                                                 |        |                |        |                   |       |        |         |     |         |              |   |  |  |  |
| D-/R-                              | 70  | 5y   | 69%  | (59-81) | 0.198        | 1%                                              | (0-10) | 4%             | (1-13) | 0.459             | 6%    | (2-15) | 0.867   | 19% | (12-31) | 0.565        |   |  |  |  |
| others                             | 194 | 5y   | 59%  | (52-67) |              | 12%                                             | (8-17) | 7%             | (4-11) |                   | 5%    | (3-10) |         | 17% | (12-23) |              |   |  |  |  |
| <b>Conditioning</b>                |     |      |      |         |              |                                                 |        |                |        |                   |       |        |         |     |         |              |   |  |  |  |
| No TBI                             | 194 | 5y   | 61%  | (55-69) | 0.913        | 11%                                             | (7-17) | 7%             | (4-11) | 0.681             | 4%    | (2-9)  | 0.216   | 17% | (12-23) | 0.227        |   |  |  |  |
| Low dose TBI                       | 76  | 5y   | 61%  | (51-73) |              | 4%                                              | (1-12) | 5%             | (2-14) |                   | 8%    | (4-17) |         | 22% | (14-34) |              |   |  |  |  |
| <b>Time from diag to Allo-HSCT</b> |     |      |      |         |              |                                                 |        |                |        |                   |       |        |         |     |         |              |   |  |  |  |
| ≤ 6 months                         | 179 | 5y   | 65%  | (56-76) | 0.451        | 9%                                              | (5-18) | 7%             | (3-14) | 0.893             | 7%    | (3-15) | 0.456   | 13% | (7-22)  | 0.085        |   |  |  |  |
| > 6 monts                          | 91  | 5y   | 59%  | (52-67) |              | 9%                                              | (6-14) | 6%             | (3-11) |                   | 5%    | (2-9)  |         | 21% | (15-28) |              |   |  |  |  |
| <b>Donor type</b>                  |     |      |      |         |              |                                                 |        |                |        |                   |       |        |         |     |         |              |   |  |  |  |
| Matched related                    | 128 | 5y   | 62%  | (54-71) | 0.566        | 12%                                             | (8-19) | 5%             | (2-10) | 0.285             | 6%    | (3-12) | 0.862   | 15% | (10-23) | 0.225        |   |  |  |  |
| Unrelated                          | 142 | 5y   | 61%  | (53-69) |              | 6%                                              | (3-12) | 8%             | (4-14) |                   | 5%    | (2-10) |         | 20% | (15-28) |              |   |  |  |  |

**Supplementary Table 3: 5-year Predicted probabilities of GRFS and causes of GRFS failure according to covariate combinations in the upfront cohort.**

| Covariate combinations |                                      |        |       |              |                          | Predicted probabilities of causes of GRFS failure at 5 years after Allo-HSCT |     |      |     |       |     |       |     |       |     |
|------------------------|--------------------------------------|--------|-------|--------------|--------------------------|------------------------------------------------------------------------------|-----|------|-----|-------|-----|-------|-----|-------|-----|
| Age (y)                | Time from diag to allo-HSCT (months) | CMV    | Donor | Graft source | In vivo T-cell depletion | GRFS                                                                         |     | GF   |     | AGVHD |     | CGVHD |     | Death |     |
|                        |                                      |        |       |              |                          | prob                                                                         | se  | prob | se  | prob  | se  | prob  | se  | prob  | se  |
| 10                     | > 6 months                           | D-/R-  | MRD   | BM           | no                       | 56%                                                                          | 24% | 29%  | 24% | 2%    | 4%  | 9%    | 9%  | 4%    | 4%  |
| 20                     | > 6 months                           | D-/R-  | MRD   | BM           | no                       | 49%                                                                          | 24% | 31%  | 24% | 3%    | 4%  | 12%   | 12% | 6%    | 7%  |
| 30                     | > 6 months                           | D-/R-  | MRD   | BM           | no                       | 40%                                                                          | 25% | 32%  | 24% | 3%    | 5%  | 15%   | 15% | 9%    | 10% |
| 40                     | > 6 months                           | D-/R-  | MRD   | BM           | no                       | 31%                                                                          | 26% | 33%  | 26% | 3%    | 6%  | 19%   | 20% | 14%   | 14% |
| 50                     | > 6 months                           | D-/R-  | MRD   | BM           | no                       | 21%                                                                          | 25% | 32%  | 27% | 4%    | 6%  | 23%   | 24% | 20%   | 21% |
| 10                     | <= 6 months                          | D-/R-  | MRD   | BM           | no                       | 83%                                                                          | 9%  | 9%   | 8%  | 1%    | 2%  | 5%    | 5%  | 1%    | 1%  |
| 20                     | <= 6 months                          | D-/R-  | MRD   | BM           | no                       | 79%                                                                          | 11% | 10%  | 8%  | 1%    | 2%  | 8%    | 7%  | 2%    | 2%  |
| 30                     | <= 6 months                          | D-/R-  | MRD   | BM           | no                       | 74%                                                                          | 13% | 11%  | 10% | 2%    | 2%  | 11%   | 10% | 3%    | 3%  |
| 40                     | <= 6 months                          | D-/R-  | MRD   | BM           | no                       | 67%                                                                          | 18% | 12%  | 11% | 2%    | 3%  | 15%   | 14% | 4%    | 5%  |
| 50                     | <= 6 months                          | D-/R-  | MRD   | BM           | no                       | 59%                                                                          | 24% | 13%  | 14% | 2%    | 4%  | 20%   | 21% | 6%    | 8%  |
| 10                     | > 6 months                           | others | MRD   | BM           | no                       | 43%                                                                          | 18% | 29%  | 17% | 3%    | 4%  | 11%   | 9%  | 13%   | 9%  |
| 20                     | > 6 months                           | others | MRD   | BM           | no                       | 33%                                                                          | 16% | 29%  | 15% | 4%    | 4%  | 14%   | 10% | 20%   | 11% |
| 30                     | > 6 months                           | others | MRD   | BM           | no                       | 23%                                                                          | 14% | 28%  | 14% | 4%    | 5%  | 16%   | 11% | 28%   | 14% |
| 40                     | > 6 months                           | others | MRD   | BM           | no                       | 13%                                                                          | 12% | 26%  | 15% | 4%    | 5%  | 17%   | 13% | 40%   | 18% |
| 50                     | > 6 months                           | others | MRD   | BM           | no                       | 6%                                                                           | 8%  | 22%  | 16% | 4%    | 5%  | 16%   | 14% | 52%   | 22% |
| 10                     | <= 6 months                          | others | MRD   | BM           | no                       | 77%                                                                          | 8%  | 10%  | 6%  | 2%    | 2%  | 8%    | 5%  | 4%    | 3%  |
| 20                     | <= 6 months                          | others | MRD   | BM           | no                       | 70%                                                                          | 8%  | 11%  | 5%  | 2%    | 2%  | 11%   | 6%  | 6%    | 4%  |
| 30                     | <= 6 months                          | others | MRD   | BM           | no                       | 62%                                                                          | 10% | 12%  | 6%  | 2%    | 3%  | 14%   | 8%  | 9%    | 5%  |
| 40                     | <= 6 months                          | others | MRD   | BM           | no                       | 52%                                                                          | 14% | 12%  | 8%  | 3%    | 3%  | 19%   | 12% | 14%   | 8%  |
| 50                     | <= 6 months                          | others | MRD   | BM           | no                       | 40%                                                                          | 18% | 12%  | 9%  | 3%    | 4%  | 24%   | 17% | 21%   | 13% |
| 10                     | > 6 months                           | D-/R-  | MRD   | PBSC         | no                       | 65%                                                                          | 26% | 21%  | 24% | 8%    | 14% | 2%    | 3%  | 4%    | 5%  |
| 20                     | > 6 months                           | D-/R-  | MRD   | PBSC         | no                       | 59%                                                                          | 26% | 23%  | 24% | 9%    | 15% | 3%    | 4%  | 6%    | 7%  |
| 30                     | > 6 months                           | D-/R-  | MRD   | PBSC         | no                       | 52%                                                                          | 27% | 24%  | 24% | 10%   | 16% | 3%    | 5%  | 10%   | 11% |
| 40                     | > 6 months                           | D-/R-  | MRD   | PBSC         | no                       | 44%                                                                          | 28% | 25%  | 25% | 11%   | 18% | 4%    | 6%  | 15%   | 16% |
| 50                     | > 6 months                           | D-/R-  | MRD   | PBSC         | no                       | 35%                                                                          | 29% | 25%  | 26% | 12%   | 20% | 6%    | 8%  | 22%   | 23% |
| 10                     | <= 6 months                          | D-/R-  | MRD   | PBSC         | no                       | 87%                                                                          | 10% | 6%   | 8%  | 4%    | 7%  | 1%    | 2%  | 1%    | 1%  |
| 20                     | <= 6 months                          | D-/R-  | MRD   | PBSC         | no                       | 85%                                                                          | 11% | 7%   | 8%  | 5%    | 7%  | 2%    | 2%  | 2%    | 2%  |
| 30                     | <= 6 months                          | D-/R-  | MRD   | PBSC         | no                       | 82%                                                                          | 12% | 8%   | 9%  | 6%    | 8%  | 2%    | 3%  | 3%    | 3%  |
| 40                     | <= 6 months                          | D-/R-  | MRD   | PBSC         | no                       | 77%                                                                          | 15% | 9%   | 11% | 6%    | 10% | 3%    | 4%  | 4%    | 5%  |
| 50                     | <= 6 months                          | D-/R-  | MRD   | PBSC         | no                       | 72%                                                                          | 18% | 9%   | 12% | 7%    | 11% | 4%    | 6%  | 7%    | 8%  |
| 10                     | > 6 months                           | others | MRD   | PBSC         | no                       | 51%                                                                          | 22% | 21%  | 19% | 12%   | 16% | 2%    | 3%  | 14%   | 11% |
| 20                     | > 6 months                           | others | MRD   | PBSC         | no                       | 42%                                                                          | 21% | 21%  | 17% | 13%   | 15% | 3%    | 4%  | 20%   | 14% |
| 30                     | > 6 months                           | others | MRD   | PBSC         | no                       | 32%                                                                          | 19% | 21%  | 15% | 14%   | 15% | 4%    | 4%  | 30%   | 18% |
| 40                     | > 6 months                           | others | MRD   | PBSC         | no                       | 21%                                                                          | 17% | 19%  | 14% | 14%   | 15% | 4%    | 5%  | 42%   | 21% |
| 50                     | > 6 months                           | others | MRD   | PBSC         | no                       | 11%                                                                          | 13% | 16%  | 13% | 14%   | 15% | 4%    | 5%  | 55%   | 23% |
| 10                     | <= 6 months                          | others | MRD   | PBSC         | no                       | 81%                                                                          | 11% | 7%   | 7%  | 6%    | 9%  | 2%    | 2%  | 4%    | 3%  |
| 20                     | <= 6 months                          | others | MRD   | PBSC         | no                       | 77%                                                                          | 11% | 8%   | 7%  | 7%    | 9%  | 2%    | 3%  | 6%    | 5%  |

|    |             |        |     |      |     |     |     |     |     |     |     |     |     |     |     |
|----|-------------|--------|-----|------|-----|-----|-----|-----|-----|-----|-----|-----|-----|-----|-----|
| 30 | <= 6 months | others | MRD | PBSC | no  | 71% | 12% | 8%  | 7%  | 8%  | 9%  | 3%  | 4%  | 10% | 7%  |
| 40 | <= 6 months | others | MRD | PBSC | no  | 63% | 15% | 9%  | 8%  | 9%  | 10% | 4%  | 5%  | 15% | 10% |
| 50 | <= 6 months | others | MRD | PBSC | no  | 53% | 18% | 9%  | 9%  | 10% | 12% | 5%  | 6%  | 23% | 15% |
| 10 | > 6 months  | D-/R-  | MRD | BM   | yes | 82% | 9%  | 8%  | 7%  | 1%  | 2%  | 6%  | 5%  | 2%  | 3%  |
| 20 | > 6 months  | D-/R-  | MRD | BM   | yes | 77% | 10% | 9%  | 7%  | 2%  | 2%  | 8%  | 7%  | 4%  | 4%  |
| 30 | > 6 months  | D-/R-  | MRD | BM   | yes | 71% | 13% | 10% | 8%  | 2%  | 2%  | 11% | 9%  | 6%  | 6%  |
| 40 | > 6 months  | D-/R-  | MRD | BM   | yes | 63% | 17% | 11% | 9%  | 2%  | 3%  | 15% | 13% | 9%  | 9%  |
| 50 | > 6 months  | D-/R-  | MRD | BM   | yes | 53% | 22% | 11% | 11% | 2%  | 4%  | 20% | 19% | 14% | 14% |
| 10 | <= 6 months | D-/R-  | MRD | BM   | yes | 93% | 3%  | 2%  | 2%  | 1%  | 1%  | 3%  | 2%  | 1%  | 1%  |
| 20 | <= 6 months | D-/R-  | MRD | BM   | yes | 91% | 4%  | 3%  | 2%  | 1%  | 1%  | 4%  | 3%  | 1%  | 1%  |
| 30 | <= 6 months | D-/R-  | MRD | BM   | yes | 88% | 6%  | 3%  | 2%  | 1%  | 1%  | 6%  | 5%  | 2%  | 2%  |
| 40 | <= 6 months | D-/R-  | MRD | BM   | yes | 84% | 8%  | 3%  | 3%  | 1%  | 1%  | 9%  | 7%  | 2%  | 3%  |
| 50 | <= 6 months | D-/R-  | MRD | BM   | yes | 79% | 13% | 4%  | 4%  | 1%  | 2%  | 13% | 12% | 4%  | 4%  |
| 10 | > 6 months  | others | MRD | BM   | yes | 73% | 10% | 9%  | 6%  | 2%  | 2%  | 8%  | 6%  | 9%  | 5%  |
| 20 | > 6 months  | others | MRD | BM   | yes | 64% | 10% | 10% | 6%  | 2%  | 2%  | 11% | 7%  | 13% | 6%  |
| 30 | > 6 months  | others | MRD | BM   | yes | 54% | 11% | 10% | 6%  | 3%  | 2%  | 14% | 8%  | 20% | 8%  |
| 40 | > 6 months  | others | MRD | BM   | yes | 41% | 12% | 10% | 6%  | 3%  | 3%  | 17% | 10% | 30% | 11% |
| 50 | > 6 months  | others | MRD | BM   | yes | 27% | 14% | 9%  | 7%  | 3%  | 3%  | 19% | 13% | 42% | 16% |
| 10 | <= 6 months | others | MRD | BM   | yes | 90% | 4%  | 3%  | 2%  | 1%  | 1%  | 5%  | 3%  | 2%  | 1%  |
| 20 | <= 6 months | others | MRD | BM   | yes | 86% | 4%  | 3%  | 2%  | 1%  | 1%  | 6%  | 3%  | 4%  | 2%  |
| 30 | <= 6 months | others | MRD | BM   | yes | 81% | 5%  | 3%  | 2%  | 1%  | 1%  | 9%  | 4%  | 6%  | 3%  |
| 40 | <= 6 months | others | MRD | BM   | yes | 74% | 8%  | 3%  | 2%  | 1%  | 2%  | 12% | 6%  | 9%  | 4%  |
| 50 | <= 6 months | others | MRD | BM   | yes | 64% | 13% | 4%  | 3%  | 2%  | 2%  | 17% | 11% | 14% | 8%  |
| 10 | > 6 months  | D-/R-  | MRD | PBSC | yes | 86% | 9%  | 6%  | 6%  | 5%  | 6%  | 1%  | 2%  | 2%  | 3%  |
| 20 | > 6 months  | D-/R-  | MRD | PBSC | yes | 83% | 10% | 6%  | 7%  | 5%  | 6%  | 2%  | 2%  | 4%  | 4%  |
| 30 | > 6 months  | D-/R-  | MRD | PBSC | yes | 78% | 11% | 7%  | 7%  | 6%  | 7%  | 2%  | 3%  | 6%  | 6%  |
| 40 | > 6 months  | D-/R-  | MRD | PBSC | yes | 73% | 14% | 8%  | 8%  | 7%  | 8%  | 3%  | 4%  | 10% | 10% |
| 50 | > 6 months  | D-/R-  | MRD | PBSC | yes | 65% | 18% | 8%  | 9%  | 8%  | 10% | 4%  | 6%  | 15% | 15% |
| 10 | <= 6 months | D-/R-  | MRD | PBSC | yes | 95% | 3%  | 2%  | 2%  | 2%  | 3%  | 1%  | 1%  | 1%  | 1%  |
| 20 | <= 6 months | D-/R-  | MRD | PBSC | yes | 94% | 4%  | 2%  | 2%  | 3%  | 3%  | 1%  | 1%  | 1%  | 1%  |
| 30 | <= 6 months | D-/R-  | MRD | PBSC | yes | 92% | 4%  | 2%  | 2%  | 3%  | 3%  | 1%  | 2%  | 2%  | 2%  |
| 40 | <= 6 months | D-/R-  | MRD | PBSC | yes | 90% | 6%  | 2%  | 2%  | 3%  | 4%  | 2%  | 2%  | 3%  | 3%  |
| 50 | <= 6 months | D-/R-  | MRD | PBSC | yes | 87% | 8%  | 3%  | 3%  | 4%  | 5%  | 3%  | 3%  | 4%  | 4%  |
| 10 | > 6 months  | others | MRD | PBSC | yes | 77% | 11% | 6%  | 6%  | 7%  | 7%  | 2%  | 2%  | 9%  | 6%  |
| 20 | > 6 months  | others | MRD | PBSC | yes | 70% | 11% | 7%  | 5%  | 8%  | 7%  | 2%  | 3%  | 14% | 8%  |
| 30 | > 6 months  | others | MRD | PBSC | yes | 61% | 11% | 7%  | 5%  | 9%  | 6%  | 3%  | 3%  | 21% | 9%  |
| 40 | > 6 months  | others | MRD | PBSC | yes | 49% | 12% | 7%  | 5%  | 9%  | 7%  | 4%  | 4%  | 31% | 11% |
| 50 | > 6 months  | others | MRD | PBSC | yes | 36% | 13% | 7%  | 5%  | 10% | 8%  | 4%  | 4%  | 44% | 14% |
| 10 | <= 6 months | others | MRD | PBSC | yes | 91% | 5%  | 2%  | 2%  | 3%  | 4%  | 1%  | 1%  | 2%  | 2%  |
| 20 | <= 6 months | others | MRD | PBSC | yes | 89% | 5%  | 2%  | 2%  | 4%  | 4%  | 1%  | 2%  | 4%  | 2%  |
| 30 | <= 6 months | others | MRD | PBSC | yes | 86% | 5%  | 2%  | 2%  | 5%  | 4%  | 2%  | 2%  | 6%  | 3%  |
| 40 | <= 6 months | others | MRD | PBSC | yes | 81% | 7%  | 2%  | 2%  | 5%  | 4%  | 3%  | 3%  | 9%  | 5%  |
| 50 | <= 6 months | others | MRD | PBSC | yes | 74% | 9%  | 3%  | 2%  | 6%  | 5%  | 4%  | 4%  | 14% | 7%  |



**Supplementary Table 4:** 5-year Predicted probabilities of GRFS and causes of GRFS failure according to covariate combinations in the rel/ref cohort.

| Covariate combinations |                                      |        |       |              |        |                          | Predicted probabilities of causes of GRFS failure at 5 years after Allo-HSCT |     |      |    |       |     |       |     |       |     |
|------------------------|--------------------------------------|--------|-------|--------------|--------|--------------------------|------------------------------------------------------------------------------|-----|------|----|-------|-----|-------|-----|-------|-----|
| Age (y)                | Time from diag to allo-HSCT (months) | CMV    | Donor | Graft source | Cond.  | In vivo T-cell depletion | GRFS                                                                         |     | GF   |    | AGVHD |     | CGVHD |     | Death |     |
|                        |                                      |        |       |              |        |                          | prob                                                                         | se  | prob | se | prob  | se  | prob  | se  | prob  | se  |
| 10                     | > 6 months                           | D-/R-  | MRD   | BM           | no TBI | no                       | 81%                                                                          | 7%  | 4%   | 3% | 3%    | 2%  | 3%    | 3%  | 10%   | 5%  |
| 20                     | > 6 months                           | D-/R-  | MRD   | BM           | no TBI | no                       | 75%                                                                          | 8%  | 4%   | 4% | 4%    | 3%  | 4%    | 3%  | 13%   | 6%  |
| 30                     | > 6 months                           | D-/R-  | MRD   | BM           | no TBI | no                       | 67%                                                                          | 10% | 4%   | 4% | 5%    | 4%  | 5%    | 4%  | 18%   | 8%  |
| 40                     | > 6 months                           | D-/R-  | MRD   | BM           | no TBI | no                       | 57%                                                                          | 12% | 4%   | 4% | 7%    | 6%  | 7%    | 6%  | 25%   | 10% |
| 50                     | > 6 months                           | D-/R-  | MRD   | BM           | no TBI | no                       | 45%                                                                          | 14% | 5%   | 4% | 10%   | 8%  | 9%    | 7%  | 32%   | 13% |
| 10                     | <= 6 months                          | D-/R-  | MRD   | BM           | no TBI | no                       | 77%                                                                          | 8%  | 3%   | 3% | 5%    | 4%  | 6%    | 5%  | 8%    | 4%  |
| 20                     | <= 6 months                          | D-/R-  | MRD   | BM           | no TBI | no                       | 70%                                                                          | 9%  | 4%   | 3% | 7%    | 6%  | 9%    | 7%  | 11%   | 5%  |
| 30                     | <= 6 months                          | D-/R-  | MRD   | BM           | no TBI | no                       | 60%                                                                          | 12% | 4%   | 3% | 10%   | 8%  | 11%   | 9%  | 15%   | 7%  |
| 40                     | <= 6 months                          | D-/R-  | MRD   | BM           | no TBI | no                       | 49%                                                                          | 14% | 4%   | 3% | 13%   | 11% | 15%   | 11% | 20%   | 9%  |
| 50                     | <= 6 months                          | D-/R-  | MRD   | BM           | no TBI | no                       | 36%                                                                          | 16% | 4%   | 3% | 18%   | 15% | 18%   | 15% | 25%   | 11% |
| 10                     | > 6 months                           | others | MRD   | BM           | no TBI | no                       | 70%                                                                          | 10% | 15%  | 9% | 5%    | 4%  | 2%    | 2%  | 7%    | 4%  |
| 20                     | > 6 months                           | others | MRD   | BM           | no TBI | no                       | 64%                                                                          | 10% | 17%  | 8% | 7%    | 4%  | 3%    | 2%  | 10%   | 5%  |
| 30                     | > 6 months                           | others | MRD   | BM           | no TBI | no                       | 56%                                                                          | 10% | 17%  | 8% | 10%   | 5%  | 4%    | 3%  | 14%   | 5%  |
| 40                     | > 6 months                           | others | MRD   | BM           | no TBI | no                       | 46%                                                                          | 10% | 18%  | 8% | 13%   | 7%  | 5%    | 3%  | 18%   | 7%  |
| 50                     | > 6 months                           | others | MRD   | BM           | no TBI | no                       | 36%                                                                          | 10% | 18%  | 8% | 17%   | 9%  | 6%    | 4%  | 23%   | 8%  |
| 10                     | <= 6 months                          | others | MRD   | BM           | no TBI | no                       | 67%                                                                          | 8%  | 14%  | 6% | 9%    | 5%  | 4%    | 3%  | 6%    | 3%  |
| 20                     | <= 6 months                          | others | MRD   | BM           | no TBI | no                       | 59%                                                                          | 8%  | 14%  | 6% | 13%   | 6%  | 6%    | 4%  | 8%    | 4%  |
| 30                     | <= 6 months                          | others | MRD   | BM           | no TBI | no                       | 49%                                                                          | 9%  | 15%  | 6% | 17%   | 8%  | 8%    | 5%  | 11%   | 4%  |
| 40                     | <= 6 months                          | others | MRD   | BM           | no TBI | no                       | 39%                                                                          | 10% | 14%  | 6% | 23%   | 11% | 10%   | 6%  | 14%   | 6%  |
| 50                     | <= 6 months                          | others | MRD   | BM           | no TBI | no                       | 27%                                                                          | 11% | 14%  | 6% | 31%   | 15% | 11%   | 8%  | 17%   | 7%  |
| 10                     | > 6 months                           | D-/R-  | UD    | BM           | no TBI | no                       | 61%                                                                          | 15% | 3%   | 2% | 19%   | 16% | 2%    | 2%  | 15%   | 8%  |
| 20                     | > 6 months                           | D-/R-  | UD    | BM           | no TBI | no                       | 50%                                                                          | 16% | 3%   | 2% | 25%   | 19% | 3%    | 3%  | 19%   | 9%  |
| 30                     | > 6 months                           | D-/R-  | UD    | BM           | no TBI | no                       | 38%                                                                          | 16% | 2%   | 2% | 33%   | 22% | 3%    | 3%  | 23%   | 11% |
| 40                     | > 6 months                           | D-/R-  | UD    | BM           | no TBI | no                       | 25%                                                                          | 16% | 2%   | 2% | 42%   | 26% | 4%    | 4%  | 27%   | 14% |
| 50                     | > 6 months                           | D-/R-  | UD    | BM           | no TBI | no                       | 14%                                                                          | 13% | 2%   | 2% | 52%   | 28% | 4%    | 4%  | 29%   | 17% |
| 10                     | <= 6 months                          | D-/R-  | UD    | BM           | no TBI | no                       | 50%                                                                          | 21% | 2%   | 2% | 33%   | 26% | 4%    | 4%  | 11%   | 6%  |
| 20                     | <= 6 months                          | D-/R-  | UD    | BM           | no TBI | no                       | 37%                                                                          | 22% | 2%   | 2% | 43%   | 30% | 5%    | 5%  | 13%   | 8%  |
| 30                     | <= 6 months                          | D-/R-  | UD    | BM           | no TBI | no                       | 24%                                                                          | 21% | 2%   | 2% | 54%   | 33% | 5%    | 6%  | 15%   | 10% |

|    |             |        |     |      |        |    |     |     |    |    |     |     |     |     |     |     |
|----|-------------|--------|-----|------|--------|----|-----|-----|----|----|-----|-----|-----|-----|-----|-----|
| 40 | <= 6 months | D-/R-  | UD  | BM   | no TBI | no | 13% | 17% | 1% | 1% | 65% | 34% | 5%  | 7%  | 16% | 13% |
| 50 | <= 6 months | D-/R-  | UD  | BM   | no TBI | no | 5%  | 10% | 1% | 1% | 75% | 30% | 3%  | 7%  | 15% | 14% |
| 10 | > 6 months  | others | UD  | BM   | no TBI | no | 46% | 20% | 9% | 6% | 33% | 25% | 1%  | 2%  | 10% | 6%  |
| 20 | > 6 months  | others | UD  | BM   | no TBI | no | 35% | 19% | 9% | 6% | 43% | 27% | 2%  | 2%  | 12% | 7%  |
| 30 | > 6 months  | others | UD  | BM   | no TBI | no | 23% | 17% | 8% | 5% | 54% | 28% | 2%  | 2%  | 14% | 8%  |
| 40 | > 6 months  | others | UD  | BM   | no TBI | no | 13% | 13% | 6% | 5% | 65% | 26% | 2%  | 2%  | 15% | 10% |
| 50 | > 6 months  | others | UD  | BM   | no TBI | no | 6%  | 8%  | 4% | 4% | 74% | 22% | 1%  | 2%  | 14% | 10% |
| 10 | <= 6 months | others | UD  | BM   | no TBI | no | 31% | 24% | 6% | 5% | 54% | 32% | 2%  | 3%  | 6%  | 5%  |
| 20 | <= 6 months | others | UD  | BM   | no TBI | no | 20% | 21% | 5% | 5% | 66% | 31% | 2%  | 3%  | 7%  | 5%  |
| 30 | <= 6 months | others | UD  | BM   | no TBI | no | 10% | 15% | 4% | 4% | 77% | 26% | 2%  | 3%  | 7%  | 6%  |
| 40 | <= 6 months | others | UD  | BM   | no TBI | no | 4%  | 8%  | 3% | 3% | 86% | 18% | 1%  | 2%  | 7%  | 6%  |
| 50 | <= 6 months | others | UD  | BM   | no TBI | no | 1%  | 3%  | 2% | 2% | 90% | 10% | 0%  | 1%  | 7%  | 5%  |
| 10 | > 6 months  | D-/R-  | MRD | PBSC | no TBI | no | 88% | 5%  | 2% | 2% | 2%  | 2%  | 2%  | 3%  | 6%  | 4%  |
| 20 | > 6 months  | D-/R-  | MRD | PBSC | no TBI | no | 83% | 7%  | 2% | 2% | 2%  | 2%  | 3%  | 4%  | 9%  | 5%  |
| 30 | > 6 months  | D-/R-  | MRD | PBSC | no TBI | no | 77% | 8%  | 2% | 2% | 3%  | 3%  | 5%  | 5%  | 12% | 6%  |
| 40 | > 6 months  | D-/R-  | MRD | PBSC | no TBI | no | 69% | 10% | 2% | 2% | 5%  | 4%  | 7%  | 6%  | 17% | 8%  |
| 50 | > 6 months  | D-/R-  | MRD | PBSC | no TBI | no | 59% | 13% | 2% | 2% | 6%  | 6%  | 9%  | 8%  | 23% | 10% |
| 10 | <= 6 months | D-/R-  | MRD | PBSC | no TBI | no | 84% | 7%  | 1% | 2% | 3%  | 3%  | 5%  | 6%  | 5%  | 3%  |
| 20 | <= 6 months | D-/R-  | MRD | PBSC | no TBI | no | 79% | 9%  | 2% | 2% | 5%  | 4%  | 8%  | 8%  | 7%  | 4%  |
| 30 | <= 6 months | D-/R-  | MRD | PBSC | no TBI | no | 71% | 12% | 2% | 2% | 6%  | 6%  | 11% | 10% | 10% | 6%  |
| 40 | <= 6 months | D-/R-  | MRD | PBSC | no TBI | no | 61% | 15% | 2% | 2% | 9%  | 8%  | 14% | 13% | 14% | 7%  |
| 50 | <= 6 months | D-/R-  | MRD | PBSC | no TBI | no | 49% | 18% | 2% | 2% | 12% | 11% | 19% | 17% | 18% | 10% |
| 10 | > 6 months  | others | MRD | PBSC | no TBI | no | 83% | 8%  | 7% | 6% | 3%  | 3%  | 2%  | 2%  | 5%  | 3%  |
| 20 | > 6 months  | others | MRD | PBSC | no TBI | no | 78% | 8%  | 8% | 6% | 5%  | 4%  | 3%  | 3%  | 7%  | 4%  |
| 30 | > 6 months  | others | MRD | PBSC | no TBI | no | 72% | 9%  | 8% | 6% | 6%  | 5%  | 4%  | 3%  | 10% | 5%  |
| 40 | > 6 months  | others | MRD | PBSC | no TBI | no | 64% | 10% | 9% | 6% | 9%  | 7%  | 5%  | 4%  | 13% | 6%  |
| 50 | > 6 months  | others | MRD | PBSC | no TBI | no | 54% | 11% | 9% | 6% | 12% | 9%  | 7%  | 5%  | 18% | 8%  |
| 10 | <= 6 months | others | MRD | PBSC | no TBI | no | 79% | 8%  | 6% | 5% | 6%  | 5%  | 4%  | 4%  | 4%  | 3%  |
| 20 | <= 6 months | others | MRD | PBSC | no TBI | no | 73% | 9%  | 7% | 5% | 8%  | 7%  | 6%  | 5%  | 6%  | 3%  |
| 30 | <= 6 months | others | MRD | PBSC | no TBI | no | 65% | 11% | 7% | 5% | 12% | 8%  | 8%  | 7%  | 8%  | 4%  |
| 40 | <= 6 months | others | MRD | PBSC | no TBI | no | 56% | 12% | 8% | 5% | 16% | 11% | 10% | 8%  | 11% | 5%  |
| 50 | <= 6 months | others | MRD | PBSC | no TBI | no | 44% | 14% | 8% | 5% | 21% | 14% | 13% | 11% | 14% | 7%  |
| 10 | > 6 months  | D-/R-  | UD  | PBSC | no TBI | no | 74% | 12% | 1% | 1% | 13% | 12% | 2%  | 2%  | 10% | 6%  |
| 20 | > 6 months  | D-/R-  | UD  | PBSC | no TBI | no | 65% | 13% | 1% | 1% | 17% | 14% | 3%  | 3%  | 14% | 7%  |

|    |             |        |     |      |        |    |     |     |    |    |     |     |     |     |     |     |
|----|-------------|--------|-----|------|--------|----|-----|-----|----|----|-----|-----|-----|-----|-----|-----|
| 30 | > 6 months  | D-/R-  | UD  | PBSC | no TBI | no | 54% | 15% | 1% | 1% | 23% | 16% | 4%  | 4%  | 18% | 9%  |
| 40 | > 6 months  | D-/R-  | UD  | PBSC | no TBI | no | 41% | 16% | 1% | 1% | 30% | 19% | 5%  | 4%  | 23% | 11% |
| 50 | > 6 months  | D-/R-  | UD  | PBSC | no TBI | no | 28% | 15% | 1% | 1% | 39% | 23% | 5%  | 5%  | 27% | 13% |
| 10 | <= 6 months | D-/R-  | UD  | PBSC | no TBI | no | 64% | 18% | 1% | 1% | 23% | 20% | 5%  | 5%  | 8%  | 5%  |
| 20 | <= 6 months | D-/R-  | UD  | PBSC | no TBI | no | 53% | 20% | 1% | 1% | 30% | 24% | 6%  | 6%  | 10% | 6%  |
| 30 | <= 6 months | D-/R-  | UD  | PBSC | no TBI | no | 40% | 21% | 1% | 1% | 39% | 28% | 7%  | 7%  | 13% | 8%  |
| 40 | <= 6 months | D-/R-  | UD  | PBSC | no TBI | no | 27% | 20% | 1% | 1% | 50% | 31% | 7%  | 8%  | 15% | 10% |
| 50 | <= 6 months | D-/R-  | UD  | PBSC | no TBI | no | 15% | 17% | 1% | 1% | 61% | 33% | 7%  | 9%  | 16% | 12% |
| 10 | > 6 months  | others | UD  | PBSC | no TBI | no | 63% | 19% | 5% | 4% | 23% | 22% | 2%  | 2%  | 8%  | 5%  |
| 20 | > 6 months  | others | UD  | PBSC | no TBI | no | 53% | 21% | 5% | 4% | 30% | 25% | 2%  | 2%  | 10% | 6%  |
| 30 | > 6 months  | others | UD  | PBSC | no TBI | no | 41% | 21% | 5% | 4% | 39% | 27% | 2%  | 2%  | 12% | 7%  |
| 40 | > 6 months  | others | UD  | PBSC | no TBI | no | 29% | 19% | 4% | 3% | 50% | 28% | 3%  | 3%  | 14% | 9%  |
| 50 | > 6 months  | others | UD  | PBSC | no TBI | no | 17% | 16% | 3% | 3% | 61% | 28% | 2%  | 3%  | 15% | 10% |
| 10 | <= 6 months | others | UD  | PBSC | no TBI | no | 49% | 26% | 4% | 3% | 39% | 31% | 3%  | 3%  | 5%  | 4%  |
| 20 | <= 6 months | others | UD  | PBSC | no TBI | no | 37% | 26% | 3% | 3% | 50% | 33% | 3%  | 4%  | 7%  | 5%  |
| 30 | <= 6 months | others | UD  | PBSC | no TBI | no | 25% | 24% | 3% | 3% | 62% | 33% | 3%  | 4%  | 7%  | 6%  |
| 40 | <= 6 months | others | UD  | PBSC | no TBI | no | 14% | 18% | 2% | 2% | 74% | 29% | 3%  | 5%  | 7%  | 7%  |
| 50 | <= 6 months | others | UD  | PBSC | no TBI | no | 6%  | 11% | 2% | 2% | 84% | 22% | 2%  | 4%  | 7%  | 7%  |
| 10 | > 6 months  | D-/R-  | MRD | BM   | TBI    | no | 84% | 8%  | 1% | 1% | 1%  | 1%  | 5%  | 6%  | 9%  | 5%  |
| 20 | > 6 months  | D-/R-  | MRD | BM   | TBI    | no | 77% | 10% | 1% | 1% | 2%  | 2%  | 7%  | 7%  | 12% | 7%  |
| 30 | > 6 months  | D-/R-  | MRD | BM   | TBI    | no | 69% | 12% | 1% | 1% | 2%  | 2%  | 10% | 9%  | 17% | 9%  |
| 40 | > 6 months  | D-/R-  | MRD | BM   | TBI    | no | 59% | 15% | 1% | 1% | 3%  | 3%  | 14% | 12% | 23% | 11% |
| 50 | > 6 months  | D-/R-  | MRD | BM   | TBI    | no | 46% | 17% | 1% | 1% | 4%  | 4%  | 18% | 15% | 31% | 13% |
| 10 | <= 6 months | D-/R-  | MRD | BM   | TBI    | no | 78% | 12% | 1% | 1% | 2%  | 2%  | 12% | 11% | 7%  | 4%  |
| 20 | <= 6 months | D-/R-  | MRD | BM   | TBI    | no | 69% | 15% | 1% | 1% | 3%  | 3%  | 16% | 15% | 10% | 6%  |
| 30 | <= 6 months | D-/R-  | MRD | BM   | TBI    | no | 59% | 19% | 1% | 1% | 4%  | 4%  | 22% | 19% | 14% | 7%  |
| 40 | <= 6 months | D-/R-  | MRD | BM   | TBI    | no | 46% | 22% | 1% | 1% | 6%  | 6%  | 28% | 23% | 19% | 9%  |
| 50 | <= 6 months | D-/R-  | MRD | BM   | TBI    | no | 32% | 24% | 1% | 1% | 8%  | 8%  | 35% | 26% | 24% | 12% |
| 10 | > 6 months  | others | MRD | BM   | TBI    | no | 82% | 7%  | 5% | 4% | 2%  | 2%  | 4%  | 4%  | 7%  | 4%  |
| 20 | > 6 months  | others | MRD | BM   | TBI    | no | 76% | 9%  | 5% | 4% | 3%  | 3%  | 6%  | 5%  | 10% | 5%  |
| 30 | > 6 months  | others | MRD | BM   | TBI    | no | 68% | 10% | 6% | 4% | 4%  | 4%  | 8%  | 7%  | 14% | 7%  |
| 40 | > 6 months  | others | MRD | BM   | TBI    | no | 58% | 11% | 6% | 4% | 6%  | 5%  | 11% | 8%  | 19% | 8%  |
| 50 | > 6 months  | others | MRD | BM   | TBI    | no | 47% | 13% | 6% | 4% | 8%  | 6%  | 14% | 10% | 25% | 10% |
| 10 | <= 6 months | others | MRD | BM   | TBI    | no | 76% | 10% | 4% | 3% | 4%  | 4%  | 9%  | 8%  | 6%  | 4%  |

|    |             |        |     |      |     |    |     |     |    |    |     |     |     |     |     |     |
|----|-------------|--------|-----|------|-----|----|-----|-----|----|----|-----|-----|-----|-----|-----|-----|
| 20 | <= 6 months | others | MRD | BM   | TBI | no | 69% | 11% | 5% | 3% | 6%  | 5%  | 13% | 10% | 8%  | 4%  |
| 30 | <= 6 months | others | MRD | BM   | TBI | no | 59% | 14% | 5% | 3% | 8%  | 6%  | 17% | 13% | 11% | 6%  |
| 40 | <= 6 months | others | MRD | BM   | TBI | no | 47% | 16% | 5% | 3% | 11% | 8%  | 22% | 15% | 15% | 7%  |
| 50 | <= 6 months | others | MRD | BM   | TBI | no | 34% | 17% | 5% | 3% | 15% | 11% | 27% | 18% | 19% | 9%  |
| 10 | > 6 months  | D-/R-  | UD  | BM   | TBI | no | 71% | 11% | 1% | 1% | 9%  | 8%  | 5%  | 5%  | 15% | 8%  |
| 20 | > 6 months  | D-/R-  | UD  | BM   | TBI | no | 61% | 12% | 1% | 1% | 12% | 10% | 7%  | 6%  | 20% | 9%  |
| 30 | > 6 months  | D-/R-  | UD  | BM   | TBI | no | 49% | 14% | 1% | 1% | 16% | 12% | 8%  | 7%  | 26% | 11% |
| 40 | > 6 months  | D-/R-  | UD  | BM   | TBI | no | 35% | 14% | 1% | 1% | 21% | 15% | 10% | 8%  | 32% | 13% |
| 50 | > 6 months  | D-/R-  | UD  | BM   | TBI | no | 22% | 13% | 1% | 1% | 28% | 18% | 11% | 9%  | 38% | 15% |
| 10 | <= 6 months | D-/R-  | UD  | BM   | TBI | no | 61% | 15% | 1% | 1% | 16% | 14% | 10% | 10% | 12% | 7%  |
| 20 | <= 6 months | D-/R-  | UD  | BM   | TBI | no | 49% | 17% | 1% | 1% | 21% | 18% | 13% | 11% | 15% | 8%  |
| 30 | <= 6 months | D-/R-  | UD  | BM   | TBI | no | 36% | 18% | 1% | 1% | 29% | 22% | 15% | 13% | 19% | 10% |
| 40 | <= 6 months | D-/R-  | UD  | BM   | TBI | no | 23% | 17% | 1% | 1% | 37% | 27% | 17% | 15% | 22% | 12% |
| 50 | <= 6 months | D-/R-  | UD  | BM   | TBI | no | 12% | 13% | 1% | 1% | 47% | 32% | 16% | 16% | 25% | 15% |
| 10 | > 6 months  | others | UD  | BM   | TBI | no | 65% | 14% | 3% | 3% | 16% | 14% | 4%  | 4%  | 12% | 6%  |
| 20 | > 6 months  | others | UD  | BM   | TBI | no | 55% | 15% | 4% | 3% | 22% | 17% | 5%  | 4%  | 15% | 8%  |
| 30 | > 6 months  | others | UD  | BM   | TBI | no | 43% | 15% | 3% | 3% | 29% | 19% | 6%  | 5%  | 19% | 9%  |
| 40 | > 6 months  | others | UD  | BM   | TBI | no | 30% | 14% | 3% | 2% | 37% | 21% | 7%  | 5%  | 23% | 10% |
| 50 | > 6 months  | others | UD  | BM   | TBI | no | 18% | 12% | 3% | 2% | 47% | 23% | 7%  | 6%  | 26% | 12% |
| 10 | <= 6 months | others | UD  | BM   | TBI | no | 53% | 19% | 3% | 2% | 28% | 22% | 7%  | 7%  | 9%  | 5%  |
| 20 | <= 6 months | others | UD  | BM   | TBI | no | 41% | 19% | 3% | 2% | 37% | 26% | 8%  | 8%  | 11% | 6%  |
| 30 | <= 6 months | others | UD  | BM   | TBI | no | 28% | 18% | 2% | 2% | 48% | 28% | 9%  | 9%  | 13% | 8%  |
| 40 | <= 6 months | others | UD  | BM   | TBI | no | 16% | 15% | 2% | 2% | 59% | 29% | 9%  | 10% | 14% | 9%  |
| 50 | <= 6 months | others | UD  | BM   | TBI | no | 7%  | 10% | 1% | 1% | 70% | 28% | 7%  | 10% | 14% | 10% |
| 10 | > 6 months  | D-/R-  | MRD | PBSC | TBI | no | 88% | 7%  | 0% | 1% | 1%  | 1%  | 5%  | 6%  | 6%  | 4%  |
| 20 | > 6 months  | D-/R-  | MRD | PBSC | TBI | no | 84% | 10% | 1% | 1% | 1%  | 1%  | 7%  | 8%  | 8%  | 5%  |
| 30 | > 6 months  | D-/R-  | MRD | PBSC | TBI | no | 77% | 12% | 1% | 1% | 1%  | 2%  | 9%  | 11% | 11% | 7%  |
| 40 | > 6 months  | D-/R-  | MRD | PBSC | TBI | no | 69% | 16% | 1% | 1% | 2%  | 2%  | 13% | 14% | 16% | 9%  |
| 50 | > 6 months  | D-/R-  | MRD | PBSC | TBI | no | 58% | 19% | 1% | 1% | 3%  | 3%  | 17% | 17% | 21% | 12% |
| 10 | <= 6 months | D-/R-  | MRD | PBSC | TBI | no | 83% | 13% | 0% | 1% | 1%  | 2%  | 10% | 13% | 5%  | 4%  |
| 20 | <= 6 months | D-/R-  | MRD | PBSC | TBI | no | 76% | 17% | 0% | 1% | 2%  | 2%  | 14% | 17% | 7%  | 5%  |
| 30 | <= 6 months | D-/R-  | MRD | PBSC | TBI | no | 68% | 22% | 1% | 1% | 3%  | 3%  | 20% | 22% | 9%  | 6%  |
| 40 | <= 6 months | D-/R-  | MRD | PBSC | TBI | no | 57% | 27% | 1% | 1% | 4%  | 5%  | 26% | 28% | 13% | 8%  |
| 50 | <= 6 months | D-/R-  | MRD | PBSC | TBI | no | 43% | 31% | 1% | 1% | 5%  | 6%  | 34% | 33% | 17% | 10% |

|    |             |        |     |      |        |     |     |     |    |    |     |     |     |     |     |     |
|----|-------------|--------|-----|------|--------|-----|-----|-----|----|----|-----|-----|-----|-----|-----|-----|
| 10 | > 6 months  | others | MRD | PBSC | TBI    | no  | 88% | 6%  | 2% | 3% | 1%  | 2%  | 4%  | 5%  | 5%  | 4%  |
| 20 | > 6 months  | others | MRD | PBSC | TBI    | no  | 84% | 8%  | 2% | 3% | 2%  | 3%  | 5%  | 6%  | 7%  | 5%  |
| 30 | > 6 months  | others | MRD | PBSC | TBI    | no  | 78% | 10% | 3% | 3% | 3%  | 3%  | 7%  | 8%  | 9%  | 6%  |
| 40 | > 6 months  | others | MRD | PBSC | TBI    | no  | 70% | 13% | 3% | 3% | 4%  | 4%  | 10% | 10% | 13% | 7%  |
| 50 | > 6 months  | others | MRD | PBSC | TBI    | no  | 60% | 15% | 3% | 3% | 5%  | 6%  | 14% | 13% | 18% | 9%  |
| 10 | <= 6 months | others | MRD | PBSC | TBI    | no  | 83% | 11% | 2% | 2% | 3%  | 3%  | 8%  | 10% | 4%  | 3%  |
| 20 | <= 6 months | others | MRD | PBSC | TBI    | no  | 77% | 14% | 2% | 2% | 4%  | 4%  | 11% | 13% | 6%  | 4%  |
| 30 | <= 6 months | others | MRD | PBSC | TBI    | no  | 69% | 17% | 2% | 2% | 5%  | 6%  | 16% | 17% | 8%  | 5%  |
| 40 | <= 6 months | others | MRD | PBSC | TBI    | no  | 59% | 21% | 2% | 2% | 7%  | 7%  | 21% | 21% | 11% | 6%  |
| 50 | <= 6 months | others | MRD | PBSC | TBI    | no  | 47% | 25% | 2% | 2% | 10% | 10% | 27% | 25% | 14% | 8%  |
| 10 | > 6 months  | D-/R-  | UD  | PBSC | TBI    | no  | 79% | 10% | 0% | 1% | 6%  | 6%  | 4%  | 5%  | 10% | 6%  |
| 20 | > 6 months  | D-/R-  | UD  | PBSC | TBI    | no  | 72% | 12% | 0% | 1% | 8%  | 8%  | 6%  | 7%  | 14% | 8%  |
| 30 | > 6 months  | D-/R-  | UD  | PBSC | TBI    | no  | 62% | 14% | 0% | 1% | 11% | 9%  | 8%  | 8%  | 19% | 10% |
| 40 | > 6 months  | D-/R-  | UD  | PBSC | TBI    | no  | 50% | 15% | 0% | 0% | 14% | 12% | 11% | 10% | 24% | 12% |
| 50 | > 6 months  | D-/R-  | UD  | PBSC | TBI    | no  | 37% | 16% | 0% | 0% | 19% | 14% | 13% | 12% | 31% | 14% |
| 10 | <= 6 months | D-/R-  | UD  | PBSC | TBI    | no  | 71% | 15% | 0% | 0% | 10% | 11% | 10% | 11% | 8%  | 6%  |
| 20 | <= 6 months | D-/R-  | UD  | PBSC | TBI    | no  | 62% | 18% | 0% | 0% | 14% | 14% | 13% | 14% | 11% | 7%  |
| 30 | <= 6 months | D-/R-  | UD  | PBSC | TBI    | no  | 50% | 20% | 0% | 0% | 19% | 18% | 16% | 17% | 14% | 9%  |
| 40 | <= 6 months | D-/R-  | UD  | PBSC | TBI    | no  | 36% | 21% | 0% | 0% | 26% | 22% | 20% | 19% | 18% | 10% |
| 50 | <= 6 months | D-/R-  | UD  | PBSC | TBI    | no  | 23% | 20% | 0% | 0% | 34% | 27% | 22% | 21% | 21% | 13% |
| 10 | > 6 months  | others | UD  | PBSC | TBI    | no  | 76% | 13% | 2% | 2% | 11% | 12% | 3%  | 4%  | 8%  | 5%  |
| 20 | > 6 months  | others | UD  | PBSC | TBI    | no  | 68% | 15% | 2% | 2% | 14% | 15% | 5%  | 5%  | 11% | 7%  |
| 30 | > 6 months  | others | UD  | PBSC | TBI    | no  | 58% | 16% | 2% | 2% | 20% | 18% | 6%  | 6%  | 14% | 8%  |
| 40 | > 6 months  | others | UD  | PBSC | TBI    | no  | 46% | 17% | 2% | 2% | 26% | 21% | 8%  | 7%  | 18% | 10% |
| 50 | > 6 months  | others | UD  | PBSC | TBI    | no  | 33% | 17% | 2% | 1% | 34% | 24% | 9%  | 8%  | 22% | 12% |
| 10 | <= 6 months | others | UD  | PBSC | TBI    | no  | 66% | 19% | 1% | 1% | 19% | 20% | 7%  | 8%  | 6%  | 4%  |
| 20 | <= 6 months | others | UD  | PBSC | TBI    | no  | 56% | 21% | 1% | 1% | 26% | 24% | 9%  | 10% | 8%  | 6%  |
| 30 | <= 6 months | others | UD  | PBSC | TBI    | no  | 43% | 22% | 1% | 1% | 34% | 28% | 11% | 12% | 10% | 7%  |
| 40 | <= 6 months | others | UD  | PBSC | TBI    | no  | 30% | 22% | 1% | 1% | 44% | 32% | 12% | 13% | 12% | 8%  |
| 50 | <= 6 months | others | UD  | PBSC | TBI    | no  | 18% | 18% | 1% | 1% | 55% | 34% | 12% | 15% | 14% | 10% |
| 10 | > 6 months  | D-/R-  | MRD | BM   | no TBI | yes | 86% | 5%  | 4% | 3% | 0%  | 0%  | 2%  | 2%  | 8%  | 4%  |
| 20 | > 6 months  | D-/R-  | MRD | BM   | no TBI | yes | 81% | 6%  | 4% | 3% | 0%  | 0%  | 3%  | 2%  | 11% | 5%  |
| 30 | > 6 months  | D-/R-  | MRD | BM   | no TBI | yes | 75% | 7%  | 5% | 3% | 1%  | 1%  | 4%  | 3%  | 16% | 6%  |
| 40 | > 6 months  | D-/R-  | MRD | BM   | no TBI | yes | 67% | 9%  | 5% | 4% | 1%  | 1%  | 5%  | 4%  | 22% | 8%  |

|    |             |        |     |    |        |     |     |     |     |    |     |     |     |     |     |     |
|----|-------------|--------|-----|----|--------|-----|-----|-----|-----|----|-----|-----|-----|-----|-----|-----|
| 50 | > 6 months  | D-/R-  | MRD | BM | no TBI | yes | 57% | 11% | 5%  | 4% | 1%  | 1%  | 7%  | 5%  | 30% | 10% |
| 10 | <= 6 months | D-/R-  | MRD | BM | no TBI | yes | 85% | 5%  | 4%  | 3% | 1%  | 1%  | 4%  | 3%  | 7%  | 3%  |
| 20 | <= 6 months | D-/R-  | MRD | BM | no TBI | yes | 80% | 6%  | 4%  | 3% | 1%  | 1%  | 6%  | 4%  | 10% | 4%  |
| 30 | <= 6 months | D-/R-  | MRD | BM | no TBI | yes | 73% | 8%  | 4%  | 3% | 1%  | 1%  | 8%  | 6%  | 14% | 6%  |
| 40 | <= 6 months | D-/R-  | MRD | BM | no TBI | yes | 64% | 11% | 5%  | 4% | 2%  | 2%  | 11% | 8%  | 19% | 8%  |
| 50 | <= 6 months | D-/R-  | MRD | BM | no TBI | yes | 53% | 14% | 5%  | 4% | 2%  | 3%  | 15% | 11% | 25% | 11% |
| 10 | > 6 months  | others | MRD | BM | no TBI | yes | 75% | 8%  | 17% | 8% | 1%  | 1%  | 1%  | 1%  | 6%  | 3%  |
| 20 | > 6 months  | others | MRD | BM | no TBI | yes | 70% | 7%  | 18% | 7% | 1%  | 1%  | 2%  | 1%  | 9%  | 3%  |
| 30 | > 6 months  | others | MRD | BM | no TBI | yes | 64% | 7%  | 20% | 7% | 1%  | 1%  | 3%  | 2%  | 12% | 4%  |
| 40 | > 6 months  | others | MRD | BM | no TBI | yes | 57% | 7%  | 21% | 7% | 2%  | 1%  | 4%  | 2%  | 17% | 5%  |
| 50 | > 6 months  | others | MRD | BM | no TBI | yes | 48% | 9%  | 22% | 8% | 2%  | 2%  | 5%  | 3%  | 23% | 6%  |
| 10 | <= 6 months | others | MRD | BM | no TBI | yes | 75% | 6%  | 15% | 6% | 1%  | 1%  | 3%  | 2%  | 5%  | 2%  |
| 20 | <= 6 months | others | MRD | BM | no TBI | yes | 70% | 7%  | 17% | 6% | 1%  | 1%  | 4%  | 2%  | 8%  | 3%  |
| 30 | <= 6 months | others | MRD | BM | no TBI | yes | 63% | 7%  | 18% | 7% | 2%  | 1%  | 6%  | 3%  | 11% | 4%  |
| 40 | <= 6 months | others | MRD | BM | no TBI | yes | 56% | 9%  | 19% | 8% | 3%  | 2%  | 8%  | 4%  | 14% | 5%  |
| 50 | <= 6 months | others | MRD | BM | no TBI | yes | 46% | 11% | 20% | 9% | 4%  | 3%  | 11% | 6%  | 19% | 7%  |
| 10 | > 6 months  | D-/R-  | UD  | BM | no TBI | yes | 78% | 6%  | 3%  | 2% | 2%  | 2%  | 2%  | 2%  | 14% | 5%  |
| 20 | > 6 months  | D-/R-  | UD  | BM | no TBI | yes | 71% | 7%  | 3%  | 2% | 3%  | 2%  | 3%  | 2%  | 20% | 6%  |
| 30 | > 6 months  | D-/R-  | UD  | BM | no TBI | yes | 62% | 9%  | 4%  | 3% | 4%  | 3%  | 3%  | 3%  | 27% | 8%  |
| 40 | > 6 months  | D-/R-  | UD  | BM | no TBI | yes | 50% | 10% | 4%  | 3% | 6%  | 4%  | 4%  | 3%  | 36% | 10% |
| 50 | > 6 months  | D-/R-  | UD  | BM | no TBI | yes | 38% | 12% | 4%  | 3% | 8%  | 6%  | 5%  | 4%  | 45% | 13% |
| 10 | <= 6 months | D-/R-  | UD  | BM | no TBI | yes | 76% | 7%  | 3%  | 2% | 4%  | 4%  | 4%  | 3%  | 12% | 5%  |
| 20 | <= 6 months | D-/R-  | UD  | BM | no TBI | yes | 69% | 9%  | 3%  | 2% | 6%  | 5%  | 6%  | 4%  | 17% | 7%  |
| 30 | <= 6 months | D-/R-  | UD  | BM | no TBI | yes | 59% | 11% | 3%  | 3% | 8%  | 7%  | 8%  | 6%  | 23% | 9%  |
| 40 | <= 6 months | D-/R-  | UD  | BM | no TBI | yes | 47% | 13% | 3%  | 3% | 11% | 10% | 10% | 7%  | 29% | 12% |
| 50 | <= 6 months | D-/R-  | UD  | BM | no TBI | yes | 34% | 15% | 3%  | 3% | 15% | 14% | 12% | 10% | 37% | 15% |
| 10 | > 6 months  | others | UD  | BM | no TBI | yes | 70% | 7%  | 13% | 6% | 4%  | 3%  | 1%  | 1%  | 11% | 4%  |
| 20 | > 6 months  | others | UD  | BM | no TBI | yes | 63% | 7%  | 14% | 5% | 6%  | 3%  | 2%  | 1%  | 15% | 5%  |
| 30 | > 6 months  | others | UD  | BM | no TBI | yes | 54% | 7%  | 15% | 5% | 8%  | 4%  | 2%  | 2%  | 21% | 6%  |
| 40 | > 6 months  | others | UD  | BM | no TBI | yes | 44% | 8%  | 15% | 6% | 11% | 5%  | 3%  | 2%  | 27% | 7%  |
| 50 | > 6 months  | others | UD  | BM | no TBI | yes | 32% | 9%  | 15% | 6% | 15% | 7%  | 4%  | 3%  | 34% | 9%  |
| 10 | <= 6 months | others | UD  | BM | no TBI | yes | 68% | 8%  | 12% | 6% | 8%  | 5%  | 3%  | 2%  | 9%  | 4%  |
| 20 | <= 6 months | others | UD  | BM | no TBI | yes | 60% | 9%  | 12% | 6% | 11% | 6%  | 4%  | 3%  | 13% | 5%  |
| 30 | <= 6 months | others | UD  | BM | no TBI | yes | 50% | 10% | 13% | 7% | 15% | 9%  | 5%  | 4%  | 17% | 6%  |

|    |             |        |     |      |        |     |     |     |     |    |     |     |     |     |     |     |
|----|-------------|--------|-----|------|--------|-----|-----|-----|-----|----|-----|-----|-----|-----|-----|-----|
| 40 | <= 6 months | others | UD  | BM   | no TBI | yes | 39% | 11% | 13% | 7% | 20% | 12% | 7%  | 5%  | 22% | 8%  |
| 50 | <= 6 months | others | UD  | BM   | no TBI | yes | 28% | 12% | 12% | 7% | 26% | 17% | 8%  | 6%  | 27% | 10% |
| 10 | > 6 months  | D-/R-  | MRD | PBSC | no TBI | yes | 91% | 4%  | 2%  | 2% | 0%  | 0%  | 2%  | 2%  | 5%  | 3%  |
| 20 | > 6 months  | D-/R-  | MRD | PBSC | no TBI | yes | 88% | 4%  | 2%  | 2% | 0%  | 0%  | 2%  | 2%  | 7%  | 4%  |
| 30 | > 6 months  | D-/R-  | MRD | PBSC | no TBI | yes | 84% | 6%  | 2%  | 2% | 0%  | 0%  | 3%  | 3%  | 11% | 5%  |
| 40 | > 6 months  | D-/R-  | MRD | PBSC | no TBI | yes | 78% | 7%  | 2%  | 2% | 1%  | 1%  | 5%  | 4%  | 15% | 6%  |
| 50 | > 6 months  | D-/R-  | MRD | PBSC | no TBI | yes | 70% | 9%  | 2%  | 2% | 1%  | 1%  | 6%  | 5%  | 20% | 8%  |
| 10 | <= 6 months | D-/R-  | MRD | PBSC | no TBI | yes | 90% | 5%  | 2%  | 2% | 0%  | 0%  | 4%  | 4%  | 4%  | 3%  |
| 20 | <= 6 months | D-/R-  | MRD | PBSC | no TBI | yes | 86% | 6%  | 2%  | 2% | 1%  | 1%  | 5%  | 5%  | 6%  | 3%  |
| 30 | <= 6 months | D-/R-  | MRD | PBSC | no TBI | yes | 81% | 8%  | 2%  | 2% | 1%  | 1%  | 7%  | 7%  | 9%  | 5%  |
| 40 | <= 6 months | D-/R-  | MRD | PBSC | no TBI | yes | 74% | 11% | 2%  | 2% | 1%  | 1%  | 10% | 9%  | 13% | 6%  |
| 50 | <= 6 months | D-/R-  | MRD | PBSC | no TBI | yes | 65% | 14% | 2%  | 2% | 1%  | 2%  | 14% | 13% | 17% | 9%  |
| 10 | > 6 months  | others | MRD | PBSC | no TBI | yes | 87% | 6%  | 8%  | 5% | 0%  | 0%  | 1%  | 1%  | 4%  | 2%  |
| 20 | > 6 months  | others | MRD | PBSC | no TBI | yes | 83% | 6%  | 8%  | 5% | 1%  | 1%  | 2%  | 2%  | 6%  | 3%  |
| 30 | > 6 months  | others | MRD | PBSC | no TBI | yes | 79% | 6%  | 9%  | 5% | 1%  | 1%  | 3%  | 2%  | 9%  | 4%  |
| 40 | > 6 months  | others | MRD | PBSC | no TBI | yes | 74% | 7%  | 10% | 5% | 1%  | 1%  | 4%  | 3%  | 12% | 5%  |
| 50 | > 6 months  | others | MRD | PBSC | no TBI | yes | 66% | 8%  | 11% | 5% | 1%  | 1%  | 5%  | 3%  | 17% | 6%  |
| 10 | <= 6 months | others | MRD | PBSC | no TBI | yes | 86% | 6%  | 7%  | 5% | 1%  | 1%  | 3%  | 3%  | 4%  | 2%  |
| 20 | <= 6 months | others | MRD | PBSC | no TBI | yes | 82% | 6%  | 8%  | 5% | 1%  | 1%  | 4%  | 3%  | 5%  | 3%  |
| 30 | <= 6 months | others | MRD | PBSC | no TBI | yes | 77% | 7%  | 8%  | 5% | 1%  | 1%  | 6%  | 5%  | 7%  | 3%  |
| 40 | <= 6 months | others | MRD | PBSC | no TBI | yes | 71% | 9%  | 9%  | 5% | 2%  | 2%  | 8%  | 6%  | 10% | 5%  |
| 50 | <= 6 months | others | MRD | PBSC | no TBI | yes | 63% | 11% | 10% | 6% | 3%  | 2%  | 11% | 8%  | 14% | 6%  |
| 10 | > 6 months  | D-/R-  | UD  | PBSC | no TBI | yes | 86% | 5%  | 1%  | 1% | 1%  | 1%  | 2%  | 2%  | 9%  | 4%  |
| 20 | > 6 months  | D-/R-  | UD  | PBSC | no TBI | yes | 81% | 6%  | 2%  | 1% | 2%  | 2%  | 2%  | 2%  | 13% | 5%  |
| 30 | > 6 months  | D-/R-  | UD  | PBSC | no TBI | yes | 74% | 7%  | 2%  | 1% | 3%  | 2%  | 3%  | 2%  | 18% | 6%  |
| 40 | > 6 months  | D-/R-  | UD  | PBSC | no TBI | yes | 65% | 9%  | 2%  | 1% | 4%  | 3%  | 4%  | 3%  | 25% | 8%  |
| 50 | > 6 months  | D-/R-  | UD  | PBSC | no TBI | yes | 54% | 11% | 2%  | 2% | 5%  | 4%  | 6%  | 4%  | 34% | 10% |
| 10 | <= 6 months | D-/R-  | UD  | PBSC | no TBI | yes | 84% | 6%  | 1%  | 1% | 3%  | 3%  | 4%  | 3%  | 8%  | 4%  |
| 20 | <= 6 months | D-/R-  | UD  | PBSC | no TBI | yes | 78% | 7%  | 1%  | 1% | 4%  | 3%  | 5%  | 4%  | 11% | 5%  |
| 30 | <= 6 months | D-/R-  | UD  | PBSC | no TBI | yes | 70% | 9%  | 2%  | 1% | 5%  | 5%  | 7%  | 6%  | 16% | 7%  |
| 40 | <= 6 months | D-/R-  | UD  | PBSC | no TBI | yes | 60% | 12% | 2%  | 1% | 7%  | 6%  | 10% | 8%  | 21% | 9%  |
| 50 | <= 6 months | D-/R-  | UD  | PBSC | no TBI | yes | 49% | 15% | 2%  | 2% | 10% | 9%  | 12% | 10% | 28% | 12% |
| 10 | > 6 months  | others | UD  | PBSC | no TBI | yes | 82% | 6%  | 6%  | 4% | 3%  | 3%  | 1%  | 1%  | 8%  | 4%  |
| 20 | > 6 months  | others | UD  | PBSC | no TBI | yes | 77% | 6%  | 7%  | 4% | 4%  | 3%  | 2%  | 2%  | 11% | 4%  |

|    |             |        |     |      |        |     |     |     |    |    |     |     |     |     |     |     |
|----|-------------|--------|-----|------|--------|-----|-----|-----|----|----|-----|-----|-----|-----|-----|-----|
| 30 | > 6 months  | others | UD  | PBSC | no TBI | yes | 70% | 7%  | 7% | 4% | 5%  | 4%  | 2%  | 2%  | 15% | 5%  |
| 40 | > 6 months  | others | UD  | PBSC | no TBI | yes | 62% | 8%  | 8% | 4% | 7%  | 4%  | 3%  | 2%  | 20% | 6%  |
| 50 | > 6 months  | others | UD  | PBSC | no TBI | yes | 51% | 9%  | 8% | 4% | 10% | 6%  | 4%  | 3%  | 27% | 8%  |
| 10 | <= 6 months | others | UD  | PBSC | no TBI | yes | 80% | 7%  | 6% | 4% | 5%  | 4%  | 3%  | 3%  | 7%  | 3%  |
| 20 | <= 6 months | others | UD  | PBSC | no TBI | yes | 74% | 8%  | 6% | 4% | 7%  | 5%  | 4%  | 3%  | 9%  | 4%  |
| 30 | <= 6 months | others | UD  | PBSC | no TBI | yes | 66% | 9%  | 6% | 4% | 10% | 7%  | 5%  | 4%  | 12% | 6%  |
| 40 | <= 6 months | others | UD  | PBSC | no TBI | yes | 56% | 11% | 7% | 4% | 14% | 9%  | 7%  | 6%  | 16% | 7%  |
| 50 | <= 6 months | others | UD  | PBSC | no TBI | yes | 45% | 13% | 7% | 5% | 18% | 12% | 9%  | 7%  | 21% | 9%  |
| 10 | > 6 months  | D-/R-  | MRD | BM   | TBI    | yes | 88% | 5%  | 1% | 1% | 0%  | 0%  | 3%  | 3%  | 7%  | 4%  |
| 20 | > 6 months  | D-/R-  | MRD | BM   | TBI    | yes | 83% | 6%  | 1% | 1% | 0%  | 0%  | 5%  | 4%  | 10% | 5%  |
| 30 | > 6 months  | D-/R-  | MRD | BM   | TBI    | yes | 77% | 8%  | 1% | 1% | 0%  | 0%  | 7%  | 5%  | 15% | 6%  |
| 40 | > 6 months  | D-/R-  | MRD | BM   | TBI    | yes | 68% | 10% | 1% | 1% | 0%  | 0%  | 9%  | 7%  | 20% | 8%  |
| 50 | > 6 months  | D-/R-  | MRD | BM   | TBI    | yes | 58% | 13% | 2% | 1% | 0%  | 1%  | 13% | 10% | 27% | 11% |
| 10 | <= 6 months | D-/R-  | MRD | BM   | TBI    | yes | 85% | 8%  | 1% | 1% | 0%  | 0%  | 8%  | 7%  | 6%  | 3%  |
| 20 | <= 6 months | D-/R-  | MRD | BM   | TBI    | yes | 79% | 10% | 1% | 1% | 0%  | 0%  | 11% | 9%  | 9%  | 5%  |
| 30 | <= 6 months | D-/R-  | MRD | BM   | TBI    | yes | 71% | 13% | 1% | 1% | 0%  | 1%  | 15% | 12% | 12% | 6%  |
| 40 | <= 6 months | D-/R-  | MRD | BM   | TBI    | yes | 60% | 16% | 1% | 1% | 1%  | 1%  | 21% | 16% | 17% | 8%  |
| 50 | <= 6 months | D-/R-  | MRD | BM   | TBI    | yes | 48% | 20% | 1% | 1% | 1%  | 1%  | 27% | 21% | 23% | 11% |
| 10 | > 6 months  | others | MRD | BM   | TBI    | yes | 86% | 6%  | 5% | 4% | 0%  | 0%  | 3%  | 2%  | 6%  | 3%  |
| 20 | > 6 months  | others | MRD | BM   | TBI    | yes | 82% | 6%  | 6% | 4% | 0%  | 0%  | 4%  | 3%  | 9%  | 4%  |
| 30 | > 6 months  | others | MRD | BM   | TBI    | yes | 76% | 7%  | 6% | 4% | 0%  | 1%  | 5%  | 4%  | 12% | 5%  |
| 40 | > 6 months  | others | MRD | BM   | TBI    | yes | 68% | 8%  | 7% | 4% | 1%  | 1%  | 8%  | 5%  | 17% | 6%  |
| 50 | > 6 months  | others | MRD | BM   | TBI    | yes | 59% | 9%  | 7% | 4% | 1%  | 1%  | 10% | 6%  | 23% | 8%  |
| 10 | <= 6 months | others | MRD | BM   | TBI    | yes | 84% | 6%  | 5% | 3% | 0%  | 1%  | 6%  | 5%  | 5%  | 3%  |
| 20 | <= 6 months | others | MRD | BM   | TBI    | yes | 78% | 7%  | 5% | 4% | 1%  | 1%  | 9%  | 6%  | 7%  | 3%  |
| 30 | <= 6 months | others | MRD | BM   | TBI    | yes | 71% | 9%  | 6% | 4% | 1%  | 1%  | 12% | 8%  | 10% | 4%  |
| 40 | <= 6 months | others | MRD | BM   | TBI    | yes | 62% | 11% | 6% | 4% | 1%  | 1%  | 17% | 10% | 14% | 6%  |
| 50 | <= 6 months | others | MRD | BM   | TBI    | yes | 51% | 14% | 6% | 4% | 2%  | 2%  | 22% | 14% | 19% | 8%  |
| 10 | > 6 months  | D-/R-  | UD  | BM   | TBI    | yes | 81% | 6%  | 1% | 1% | 1%  | 1%  | 3%  | 3%  | 13% | 5%  |
| 20 | > 6 months  | D-/R-  | UD  | BM   | TBI    | yes | 74% | 7%  | 1% | 1% | 1%  | 1%  | 5%  | 3%  | 19% | 6%  |
| 30 | > 6 months  | D-/R-  | UD  | BM   | TBI    | yes | 65% | 8%  | 1% | 1% | 2%  | 2%  | 7%  | 4%  | 25% | 7%  |
| 40 | > 6 months  | D-/R-  | UD  | BM   | TBI    | yes | 54% | 9%  | 1% | 1% | 3%  | 2%  | 9%  | 5%  | 34% | 9%  |
| 50 | > 6 months  | D-/R-  | UD  | BM   | TBI    | yes | 40% | 11% | 1% | 1% | 4%  | 3%  | 11% | 6%  | 44% | 11% |
| 10 | <= 6 months | D-/R-  | UD  | BM   | TBI    | yes | 78% | 8%  | 1% | 1% | 2%  | 2%  | 8%  | 6%  | 11% | 5%  |



|    |             |        |     |      |     |     |     |     |    |    |     |    |     |     |     |     |
|----|-------------|--------|-----|------|-----|-----|-----|-----|----|----|-----|----|-----|-----|-----|-----|
| 20 | <= 6 months | D-/R-  | UD  | BM   | TBI | yes | 70% | 9%  | 1% | 1% | 3%  | 2% | 11% | 7%  | 16% | 7%  |
| 30 | <= 6 months | D-/R-  | UD  | BM   | TBI | yes | 60% | 12% | 1% | 1% | 4%  | 3% | 15% | 9%  | 21% | 8%  |
| 40 | <= 6 months | D-/R-  | UD  | BM   | TBI | yes | 47% | 14% | 1% | 1% | 5%  | 5% | 19% | 12% | 28% | 11% |
| 50 | <= 6 months | D-/R-  | UD  | BM   | TBI | yes | 33% | 16% | 1% | 1% | 7%  | 7% | 23% | 15% | 36% | 13% |
| 10 | > 6 months  | others | UD  | BM   | TBI | yes | 80% | 6%  | 4% | 3% | 2%  | 2% | 3%  | 2%  | 11% | 4%  |
| 20 | > 6 months  | others | UD  | BM   | TBI | yes | 74% | 6%  | 5% | 3% | 3%  | 2% | 4%  | 3%  | 15% | 5%  |
| 30 | > 6 months  | others | UD  | BM   | TBI | yes | 65% | 7%  | 5% | 3% | 4%  | 2% | 5%  | 3%  | 21% | 6%  |
| 40 | > 6 months  | others | UD  | BM   | TBI | yes | 55% | 7%  | 5% | 3% | 5%  | 3% | 7%  | 4%  | 28% | 7%  |
| 50 | > 6 months  | others | UD  | BM   | TBI | yes | 43% | 8%  | 5% | 3% | 7%  | 4% | 9%  | 4%  | 37% | 8%  |
| 10 | <= 6 months | others | UD  | BM   | TBI | yes | 77% | 7%  | 4% | 3% | 4%  | 3% | 6%  | 4%  | 9%  | 4%  |
| 20 | <= 6 months | others | UD  | BM   | TBI | yes | 70% | 8%  | 4% | 3% | 5%  | 4% | 8%  | 5%  | 13% | 5%  |
| 30 | <= 6 months | others | UD  | BM   | TBI | yes | 60% | 9%  | 4% | 3% | 7%  | 5% | 11% | 6%  | 18% | 6%  |
| 40 | <= 6 months | others | UD  | BM   | TBI | yes | 48% | 11% | 4% | 3% | 9%  | 6% | 15% | 8%  | 23% | 8%  |
| 50 | <= 6 months | others | UD  | BM   | TBI | yes | 36% | 12% | 4% | 3% | 13% | 9% | 18% | 10% | 29% | 10% |
| 10 | > 6 months  | D-/R-  | MRD | PBSC | TBI | yes | 92% | 5%  | 1% | 1% | 0%  | 0% | 3%  | 4%  | 5%  | 3%  |
| 20 | > 6 months  | D-/R-  | MRD | PBSC | TBI | yes | 88% | 6%  | 1% | 1% | 0%  | 0% | 4%  | 5%  | 7%  | 4%  |
| 30 | > 6 months  | D-/R-  | MRD | PBSC | TBI | yes | 84% | 8%  | 1% | 1% | 0%  | 0% | 6%  | 6%  | 10% | 6%  |
| 40 | > 6 months  | D-/R-  | MRD | PBSC | TBI | yes | 77% | 11% | 1% | 1% | 0%  | 0% | 9%  | 8%  | 13% | 7%  |
| 50 | > 6 months  | D-/R-  | MRD | PBSC | TBI | yes | 69% | 14% | 1% | 1% | 0%  | 0% | 12% | 11% | 19% | 9%  |
| 10 | <= 6 months | D-/R-  | MRD | PBSC | TBI | yes | 89% | 8%  | 0% | 1% | 0%  | 0% | 7%  | 8%  | 4%  | 3%  |
| 20 | <= 6 months | D-/R-  | MRD | PBSC | TBI | yes | 84% | 11% | 1% | 1% | 0%  | 0% | 9%  | 11% | 6%  | 4%  |
| 30 | <= 6 months | D-/R-  | MRD | PBSC | TBI | yes | 78% | 15% | 1% | 1% | 0%  | 0% | 13% | 15% | 8%  | 5%  |
| 40 | <= 6 months | D-/R-  | MRD | PBSC | TBI | yes | 69% | 19% | 1% | 1% | 0%  | 1% | 19% | 19% | 11% | 7%  |
| 50 | <= 6 months | D-/R-  | MRD | PBSC | TBI | yes | 58% | 25% | 1% | 1% | 1%  | 1% | 25% | 25% | 15% | 9%  |
| 10 | > 6 months  | others | MRD | PBSC | TBI | yes | 91% | 4%  | 2% | 2% | 0%  | 0% | 2%  | 3%  | 4%  | 3%  |
| 20 | > 6 months  | others | MRD | PBSC | TBI | yes | 88% | 5%  | 3% | 2% | 0%  | 0% | 3%  | 4%  | 6%  | 3%  |
| 30 | > 6 months  | others | MRD | PBSC | TBI | yes | 84% | 7%  | 3% | 3% | 0%  | 0% | 5%  | 5%  | 8%  | 4%  |
| 40 | > 6 months  | others | MRD | PBSC | TBI | yes | 78% | 9%  | 3% | 3% | 0%  | 1% | 7%  | 6%  | 11% | 6%  |
| 50 | > 6 months  | others | MRD | PBSC | TBI | yes | 71% | 11% | 3% | 3% | 1%  | 1% | 9%  | 8%  | 16% | 7%  |
| 10 | <= 6 months | others | MRD | PBSC | TBI | yes | 89% | 7%  | 2% | 2% | 0%  | 0% | 5%  | 6%  | 3%  | 2%  |
| 20 | <= 6 months | others | MRD | PBSC | TBI | yes | 85% | 9%  | 2% | 2% | 0%  | 1% | 8%  | 8%  | 5%  | 3%  |
| 30 | <= 6 months | others | MRD | PBSC | TBI | yes | 79% | 12% | 2% | 2% | 1%  | 1% | 11% | 11% | 7%  | 4%  |
| 40 | <= 6 months | others | MRD | PBSC | TBI | yes | 72% | 15% | 3% | 2% | 1%  | 1% | 15% | 15% | 9%  | 5%  |
| 50 | <= 6 months | others | MRD | PBSC | TBI | yes | 62% | 19% | 3% | 2% | 1%  | 1% | 21% | 19% | 13% | 7%  |

|    |             |        |    |      |     |     |     |     |    |    |    |    |     |     |     |     |
|----|-------------|--------|----|------|-----|-----|-----|-----|----|----|----|----|-----|-----|-----|-----|
| 10 | > 6 months  | D-/R-  | UD | PBSC | TBI | yes | 87% | 5%  | 0% | 0% | 1% | 1% | 3%  | 3%  | 9%  | 5%  |
| 20 | > 6 months  | D-/R-  | UD | PBSC | TBI | yes | 82% | 7%  | 0% | 0% | 1% | 1% | 4%  | 4%  | 12% | 6%  |
| 30 | > 6 months  | D-/R-  | UD | PBSC | TBI | yes | 75% | 8%  | 0% | 1% | 1% | 1% | 6%  | 5%  | 17% | 7%  |
| 40 | > 6 months  | D-/R-  | UD | PBSC | TBI | yes | 66% | 10% | 1% | 1% | 2% | 2% | 8%  | 6%  | 23% | 9%  |
| 50 | > 6 months  | D-/R-  | UD | PBSC | TBI | yes | 55% | 12% | 1% | 1% | 2% | 2% | 11% | 8%  | 31% | 11% |
| 10 | <= 6 months | D-/R-  | UD | PBSC | TBI | yes | 84% | 8%  | 0% | 0% | 1% | 1% | 7%  | 7%  | 7%  | 4%  |
| 20 | <= 6 months | D-/R-  | UD | PBSC | TBI | yes | 78% | 10% | 0% | 0% | 2% | 2% | 10% | 9%  | 10% | 6%  |
| 30 | <= 6 months | D-/R-  | UD | PBSC | TBI | yes | 69% | 13% | 0% | 0% | 2% | 2% | 13% | 12% | 14% | 7%  |
| 40 | <= 6 months | D-/R-  | UD | PBSC | TBI | yes | 59% | 17% | 0% | 0% | 3% | 3% | 18% | 15% | 20% | 10% |
| 50 | <= 6 months | D-/R-  | UD | PBSC | TBI | yes | 46% | 20% | 0% | 1% | 4% | 5% | 23% | 19% | 26% | 12% |
| 10 | > 6 months  | others | UD | PBSC | TBI | yes | 87% | 5%  | 2% | 2% | 1% | 1% | 2%  | 3%  | 7%  | 4%  |
| 20 | > 6 months  | others | UD | PBSC | TBI | yes | 83% | 6%  | 2% | 2% | 2% | 2% | 3%  | 3%  | 10% | 5%  |
| 30 | > 6 months  | others | UD | PBSC | TBI | yes | 76% | 7%  | 2% | 2% | 2% | 2% | 5%  | 4%  | 14% | 6%  |
| 40 | > 6 months  | others | UD | PBSC | TBI | yes | 68% | 9%  | 2% | 2% | 3% | 3% | 7%  | 5%  | 20% | 7%  |
| 50 | > 6 months  | others | UD | PBSC | TBI | yes | 58% | 10% | 2% | 2% | 4% | 4% | 9%  | 6%  | 26% | 9%  |
| 10 | <= 6 months | others | UD | PBSC | TBI | yes | 84% | 7%  | 2% | 2% | 2% | 2% | 5%  | 6%  | 6%  | 4%  |
| 20 | <= 6 months | others | UD | PBSC | TBI | yes | 79% | 9%  | 2% | 2% | 3% | 3% | 8%  | 7%  | 9%  | 5%  |
| 30 | <= 6 months | others | UD | PBSC | TBI | yes | 71% | 11% | 2% | 2% | 4% | 4% | 11% | 9%  | 12% | 6%  |
| 40 | <= 6 months | others | UD | PBSC | TBI | yes | 61% | 14% | 2% | 2% | 6% | 5% | 14% | 12% | 16% | 8%  |
| 50 | <= 6 months | others | UD | PBSC | TBI | yes | 49% | 16% | 2% | 2% | 8% | 7% | 19% | 15% | 21% | 10% |

**Supplementary Table 5:** Predicted probabilities of GRFS and GRFS failures within the next 2 years after landmark time that ranges from 0 to 12 months after Allo-HSCT, in the upfront cohort. Each sub-table correspond to one covariate combination. AGVHD: acute GVHD, CGVHD: Chronic GVHD, GF: graft failure; se: standard error.

**age=10 years, timing allo >6 months, cmv=D-/R-, graft=BM, In vivo Tcell depletion=no,**

| Landmark time (y) | GRFS | se   | GF   | se   | AGVHD | se   | CGVHD | se   | Death | se   |
|-------------------|------|------|------|------|-------|------|-------|------|-------|------|
| 0                 | 0.65 | 0.19 | 0.21 | 0.18 | 0.02  | 0.04 | 0.08  | 0.08 | 0.04  | 0.04 |
| 1                 | 0.68 | 0.2  | 0.19 | 0.19 | 0.02  | 0.04 | 0.08  | 0.09 | 0.03  | 0.04 |
| 2                 | 0.79 | 0.19 | 0.08 | 0.16 | 0.01  | 0.03 | 0.09  | 0.1  | 0.03  | 0.05 |
| 3                 | 0.8  | 0.19 | 0.08 | 0.17 | 0     | 0    | 0.1   | 0.1  | 0.02  | 0.05 |
| 4                 | 0.81 | 0.19 | 0.08 | 0.17 | 0     | 0    | 0.09  | 0.1  | 0.02  | 0.04 |
| 5                 | 0.83 | 0.19 | 0.09 | 0.17 | 0     | 0    | 0.07  | 0.1  | 0.02  | 0.04 |
| 6                 | 0.79 | 0.24 | 0.14 | 0.22 | 0     | 0    | 0.05  | 0.09 | 0.02  | 0.04 |
| 7                 | 0.8  | 0.24 | 0.14 | 0.23 | 0     | 0    | 0.04  | 0.09 | 0.02  | 0.04 |
| 8                 | 0.81 | 0.24 | 0.14 | 0.23 | 0     | 0    | 0.03  | 0.08 | 0.01  | 0.04 |
| 9                 | 0.8  | 0.24 | 0.14 | 0.23 | 0     | 0    | 0.05  | 0.1  | 0.01  | 0.04 |
| 10                | 0.84 | 0.23 | 0.11 | 0.22 | 0     | 0    | 0.05  | 0.1  | 0.01  | 0.03 |
| 11                | 0.78 | 0.28 | 0.17 | 0.27 | 0     | 0    | 0.05  | 0.1  | 0.01  | 0.03 |
| 12                | 0.78 | 0.28 | 0.17 | 0.27 | 0     | 0    | 0.05  | 0.1  | 0.01  | 0.03 |

**age=20 years, timing allo >6 months, cmv=D-/R-, graft=BM, In vivo Tcell depletion=no,**

| Landmark time (y) | GRFS | se   | GF   | se   | AGVHD | se   | CGVHD | se   | Death | se   |
|-------------------|------|------|------|------|-------|------|-------|------|-------|------|
| 0                 | 0.58 | 0.2  | 0.23 | 0.19 | 0.03  | 0.04 | 0.11  | 0.11 | 0.06  | 0.07 |
| 1                 | 0.62 | 0.21 | 0.21 | 0.2  | 0.02  | 0.05 | 0.11  | 0.12 | 0.04  | 0.06 |
| 2                 | 0.73 | 0.21 | 0.09 | 0.17 | 0.01  | 0.03 | 0.13  | 0.13 | 0.04  | 0.07 |
| 3                 | 0.74 | 0.22 | 0.09 | 0.17 | 0     | 0    | 0.13  | 0.14 | 0.04  | 0.07 |
| 4                 | 0.76 | 0.22 | 0.09 | 0.18 | 0     | 0    | 0.12  | 0.14 | 0.03  | 0.07 |
| 5                 | 0.78 | 0.22 | 0.09 | 0.18 | 0     | 0    | 0.1   | 0.14 | 0.03  | 0.06 |
| 6                 | 0.75 | 0.26 | 0.15 | 0.24 | 0     | 0    | 0.07  | 0.13 | 0.03  | 0.06 |
| 7                 | 0.76 | 0.26 | 0.15 | 0.24 | 0     | 0    | 0.06  | 0.12 | 0.03  | 0.07 |
| 8                 | 0.77 | 0.26 | 0.16 | 0.25 | 0     | 0    | 0.05  | 0.11 | 0.02  | 0.06 |
| 9                 | 0.76 | 0.27 | 0.16 | 0.25 | 0     | 0    | 0.07  | 0.13 | 0.02  | 0.06 |
| 10                | 0.8  | 0.26 | 0.12 | 0.23 | 0     | 0    | 0.07  | 0.14 | 0.02  | 0.05 |
| 11                | 0.73 | 0.31 | 0.18 | 0.29 | 0     | 0    | 0.07  | 0.14 | 0.02  | 0.05 |
| 12                | 0.73 | 0.31 | 0.18 | 0.29 | 0     | 0    | 0.07  | 0.14 | 0.02  | 0.05 |

**age=30 years, timing allo >6 months, cmv=D-/R-, graft=BM, In vivo Tcell depletion=no,**

| Landmark time (y) | GRFS | se   | GF   | se   | AGVHD | se   | CGVHD | se   | Death | se   |
|-------------------|------|------|------|------|-------|------|-------|------|-------|------|
| 0                 | 0.5  | 0.22 | 0.24 | 0.2  | 0.03  | 0.05 | 0.14  | 0.14 | 0.09  | 0.1  |
| 1                 | 0.54 | 0.24 | 0.23 | 0.22 | 0.03  | 0.05 | 0.15  | 0.15 | 0.06  | 0.1  |
| 2                 | 0.66 | 0.26 | 0.09 | 0.18 | 0.01  | 0.04 | 0.18  | 0.18 | 0.06  | 0.11 |
| 3                 | 0.67 | 0.26 | 0.09 | 0.19 | 0     | 0    | 0.19  | 0.19 | 0.05  | 0.11 |
| 4                 | 0.68 | 0.26 | 0.1  | 0.19 | 0     | 0    | 0.17  | 0.19 | 0.05  | 0.1  |

|    |      |      |      |      |   |   |      |      |      |      |
|----|------|------|------|------|---|---|------|------|------|------|
| 5  | 0.72 | 0.27 | 0.1  | 0.2  | 0 | 0 | 0.14 | 0.19 | 0.04 | 0.1  |
| 6  | 0.69 | 0.31 | 0.17 | 0.26 | 0 | 0 | 0.11 | 0.18 | 0.04 | 0.1  |
| 7  | 0.7  | 0.31 | 0.17 | 0.27 | 0 | 0 | 0.09 | 0.17 | 0.04 | 0.1  |
| 8  | 0.72 | 0.31 | 0.17 | 0.28 | 0 | 0 | 0.07 | 0.16 | 0.03 | 0.1  |
| 9  | 0.7  | 0.32 | 0.17 | 0.28 | 0 | 0 | 0.09 | 0.18 | 0.03 | 0.1  |
| 10 | 0.75 | 0.31 | 0.13 | 0.26 | 0 | 0 | 0.1  | 0.2  | 0.02 | 0.09 |
| 11 | 0.68 | 0.35 | 0.2  | 0.32 | 0 | 0 | 0.1  | 0.2  | 0.02 | 0.09 |
| 12 | 0.68 | 0.35 | 0.2  | 0.32 | 0 | 0 | 0.1  | 0.2  | 0.02 | 0.09 |

**age=40 years, timing allo >6 months, cmv=D-/R-, graft=BM, In vivo Tcell depletion=no,**

| Landmark time (y) | GRFS | se   | GF   | se   | AGVHD | se   | CGVHD | se   | Death | se   |
|-------------------|------|------|------|------|-------|------|-------|------|-------|------|
| 0                 | 0.4  | 0.25 | 0.26 | 0.23 | 0.03  | 0.06 | 0.18  | 0.19 | 0.14  | 0.14 |
| 1                 | 0.44 | 0.27 | 0.24 | 0.25 | 0.03  | 0.06 | 0.2   | 0.21 | 0.09  | 0.14 |
| 2                 | 0.56 | 0.31 | 0.09 | 0.2  | 0.01  | 0.05 | 0.25  | 0.25 | 0.09  | 0.17 |
| 3                 | 0.57 | 0.31 | 0.1  | 0.21 | 0     | 0    | 0.25  | 0.26 | 0.08  | 0.16 |
| 4                 | 0.59 | 0.32 | 0.1  | 0.21 | 0     | 0    | 0.24  | 0.26 | 0.07  | 0.16 |
| 5                 | 0.64 | 0.34 | 0.11 | 0.23 | 0     | 0    | 0.19  | 0.27 | 0.06  | 0.15 |
| 6                 | 0.61 | 0.37 | 0.18 | 0.3  | 0     | 0    | 0.15  | 0.26 | 0.06  | 0.16 |
| 7                 | 0.63 | 0.38 | 0.18 | 0.31 | 0     | 0    | 0.12  | 0.25 | 0.07  | 0.16 |
| 8                 | 0.66 | 0.38 | 0.19 | 0.32 | 0     | 0    | 0.09  | 0.23 | 0.05  | 0.15 |
| 9                 | 0.63 | 0.39 | 0.19 | 0.32 | 0     | 0    | 0.13  | 0.26 | 0.05  | 0.15 |
| 10                | 0.68 | 0.39 | 0.14 | 0.3  | 0     | 0    | 0.14  | 0.28 | 0.04  | 0.14 |
| 11                | 0.61 | 0.42 | 0.21 | 0.36 | 0     | 0    | 0.14  | 0.28 | 0.04  | 0.14 |
| 12                | 0.61 | 0.42 | 0.21 | 0.36 | 0     | 0    | 0.14  | 0.28 | 0.04  | 0.14 |

**age=50 years, timing allo >6 months, cmv=D-/R-, graft=BM, In vivo Tcell depletion=no,**

| Landmark time (y) | GRFS | se   | GF   | se   | AGVHD | se   | CGVHD | se   | Death | se   |
|-------------------|------|------|------|------|-------|------|-------|------|-------|------|
| 0                 | 0.29 | 0.27 | 0.27 | 0.25 | 0.04  | 0.06 | 0.21  | 0.24 | 0.2   | 0.21 |
| 1                 | 0.33 | 0.3  | 0.26 | 0.28 | 0.03  | 0.07 | 0.25  | 0.27 | 0.14  | 0.21 |
| 2                 | 0.44 | 0.37 | 0.09 | 0.22 | 0.01  | 0.06 | 0.33  | 0.34 | 0.14  | 0.25 |
| 3                 | 0.45 | 0.38 | 0.09 | 0.22 | 0     | 0    | 0.34  | 0.35 | 0.12  | 0.24 |
| 4                 | 0.48 | 0.4  | 0.1  | 0.24 | 0     | 0    | 0.32  | 0.36 | 0.1   | 0.23 |
| 5                 | 0.53 | 0.43 | 0.11 | 0.26 | 0     | 0    | 0.26  | 0.38 | 0.09  | 0.23 |
| 6                 | 0.52 | 0.45 | 0.18 | 0.34 | 0     | 0    | 0.2   | 0.38 | 0.1   | 0.25 |
| 7                 | 0.55 | 0.46 | 0.19 | 0.36 | 0     | 0    | 0.16  | 0.36 | 0.1   | 0.26 |
| 8                 | 0.59 | 0.48 | 0.2  | 0.38 | 0     | 0    | 0.13  | 0.34 | 0.08  | 0.25 |
| 9                 | 0.55 | 0.48 | 0.2  | 0.38 | 0     | 0    | 0.17  | 0.38 | 0.08  | 0.25 |
| 10                | 0.6  | 0.5  | 0.15 | 0.36 | 0     | 0    | 0.19  | 0.41 | 0.06  | 0.23 |
| 11                | 0.53 | 0.51 | 0.22 | 0.42 | 0     | 0    | 0.19  | 0.41 | 0.06  | 0.23 |
| 12                | 0.53 | 0.51 | 0.22 | 0.42 | 0     | 0    | 0.19  | 0.41 | 0.06  | 0.23 |

**age=10 years, timing allo <6 months, cmv=D-/R-, graft=BM, In vivo Tcell depletion=no,**

| Landmark time (y) | GRFS | se   | GF   | se   | AGVHD | se   | CGVHD | se   | Death | se   |
|-------------------|------|------|------|------|-------|------|-------|------|-------|------|
| 0                 | 0.87 | 0.07 | 0.06 | 0.05 | 0.01  | 0.02 | 0.05  | 0.04 | 0.01  | 0.01 |

|    |      |      |      |      |      |      |      |      |      |      |
|----|------|------|------|------|------|------|------|------|------|------|
| 1  | 0.88 | 0.07 | 0.05 | 0.05 | 0.01 | 0.02 | 0.05 | 0.04 | 0.01 | 0.01 |
| 2  | 0.92 | 0.06 | 0.02 | 0.04 | 0    | 0.01 | 0.05 | 0.05 | 0.01 | 0.01 |
| 3  | 0.92 | 0.06 | 0.02 | 0.04 | 0    | 0    | 0.05 | 0.05 | 0.01 | 0.01 |
| 4  | 0.93 | 0.06 | 0.02 | 0.04 | 0    | 0    | 0.05 | 0.05 | 0.01 | 0.01 |
| 5  | 0.94 | 0.06 | 0.02 | 0.04 | 0    | 0    | 0.04 | 0.04 | 0    | 0.01 |
| 6  | 0.93 | 0.07 | 0.04 | 0.06 | 0    | 0    | 0.03 | 0.04 | 0    | 0.01 |
| 7  | 0.93 | 0.07 | 0.04 | 0.06 | 0    | 0    | 0.02 | 0.04 | 0    | 0.01 |
| 8  | 0.94 | 0.07 | 0.04 | 0.06 | 0    | 0    | 0.02 | 0.04 | 0    | 0.01 |
| 9  | 0.93 | 0.07 | 0.04 | 0.06 | 0    | 0    | 0.03 | 0.04 | 0    | 0.01 |
| 10 | 0.94 | 0.07 | 0.03 | 0.05 | 0    | 0    | 0.03 | 0.04 | 0    | 0.01 |
| 11 | 0.93 | 0.08 | 0.05 | 0.07 | 0    | 0    | 0.03 | 0.04 | 0    | 0.01 |
| 12 | 0.93 | 0.08 | 0.05 | 0.07 | 0    | 0    | 0.03 | 0.04 | 0    | 0.01 |

**age=20 years, timing allo <6 months, cmv=D-/R-, graft=BM, In vivo Tcell depletion=no,**

| Landmark time (y) | GRFS | se   | GF   | se   | AGVHD | se   | CGVHD | se   | Death | se   |
|-------------------|------|------|------|------|-------|------|-------|------|-------|------|
| 0                 | 0.83 | 0.08 | 0.07 | 0.06 | 0.01  | 0.02 | 0.07  | 0.06 | 0.02  | 0.02 |
| 1                 | 0.85 | 0.08 | 0.06 | 0.06 | 0.01  | 0.02 | 0.07  | 0.06 | 0.01  | 0.02 |
| 2                 | 0.89 | 0.08 | 0.03 | 0.05 | 0     | 0.01 | 0.07  | 0.06 | 0.01  | 0.02 |
| 3                 | 0.89 | 0.08 | 0.03 | 0.05 | 0     | 0    | 0.07  | 0.06 | 0.01  | 0.02 |
| 4                 | 0.9  | 0.08 | 0.03 | 0.05 | 0     | 0    | 0.07  | 0.06 | 0.01  | 0.02 |
| 5                 | 0.91 | 0.08 | 0.03 | 0.05 | 0     | 0    | 0.05  | 0.06 | 0.01  | 0.02 |
| 6                 | 0.91 | 0.09 | 0.04 | 0.07 | 0     | 0    | 0.04  | 0.06 | 0.01  | 0.02 |
| 7                 | 0.92 | 0.08 | 0.04 | 0.07 | 0     | 0    | 0.03  | 0.05 | 0.01  | 0.02 |
| 8                 | 0.92 | 0.08 | 0.04 | 0.07 | 0     | 0    | 0.03  | 0.05 | 0.01  | 0.01 |
| 9                 | 0.91 | 0.09 | 0.04 | 0.07 | 0     | 0    | 0.04  | 0.06 | 0.01  | 0.01 |
| 10                | 0.93 | 0.09 | 0.03 | 0.06 | 0     | 0    | 0.04  | 0.06 | 0     | 0.01 |
| 11                | 0.91 | 0.1  | 0.05 | 0.08 | 0     | 0    | 0.04  | 0.06 | 0     | 0.01 |
| 12                | 0.91 | 0.1  | 0.05 | 0.08 | 0     | 0    | 0.04  | 0.06 | 0     | 0.01 |

**age=30 years, timing allo <6 months, cmv=D-/R-, graft=BM, In vivo Tcell depletion=no,**

| Landmark time (y) | GRFS | se   | GF   | se   | AGVHD | se   | CGVHD | se   | Death | se   |
|-------------------|------|------|------|------|-------|------|-------|------|-------|------|
| 0                 | 0.79 | 0.11 | 0.08 | 0.07 | 0.02  | 0.02 | 0.09  | 0.09 | 0.03  | 0.03 |
| 1                 | 0.8  | 0.11 | 0.07 | 0.07 | 0.01  | 0.02 | 0.1   | 0.09 | 0.02  | 0.03 |
| 2                 | 0.85 | 0.11 | 0.03 | 0.05 | 0     | 0.02 | 0.1   | 0.09 | 0.02  | 0.03 |
| 3                 | 0.86 | 0.11 | 0.03 | 0.05 | 0     | 0    | 0.1   | 0.09 | 0.01  | 0.03 |
| 4                 | 0.87 | 0.11 | 0.03 | 0.06 | 0     | 0    | 0.09  | 0.09 | 0.01  | 0.03 |
| 5                 | 0.88 | 0.11 | 0.03 | 0.06 | 0     | 0    | 0.08  | 0.09 | 0.01  | 0.02 |
| 6                 | 0.88 | 0.11 | 0.05 | 0.08 | 0     | 0    | 0.06  | 0.09 | 0.01  | 0.03 |
| 7                 | 0.89 | 0.11 | 0.05 | 0.08 | 0     | 0    | 0.05  | 0.08 | 0.01  | 0.03 |
| 8                 | 0.9  | 0.11 | 0.05 | 0.08 | 0     | 0    | 0.04  | 0.07 | 0.01  | 0.02 |
| 9                 | 0.89 | 0.12 | 0.05 | 0.08 | 0     | 0    | 0.05  | 0.09 | 0.01  | 0.02 |
| 10                | 0.9  | 0.12 | 0.04 | 0.07 | 0     | 0    | 0.05  | 0.09 | 0.01  | 0.02 |
| 11                | 0.88 | 0.13 | 0.06 | 0.09 | 0     | 0    | 0.05  | 0.09 | 0.01  | 0.02 |
| 12                | 0.88 | 0.13 | 0.06 | 0.09 | 0     | 0    | 0.05  | 0.09 | 0.01  | 0.02 |

**age=40 years, timing allo <6 months, cmv=D-/R-, graft=BM, In vivo Tcell depletion=no,**

| Landmark time (y) | GRFS | se   | GF   | se   | AGVHD | se   | CGVHD | se   | Death | se   |
|-------------------|------|------|------|------|-------|------|-------|------|-------|------|
| 0                 | 0.73 | 0.15 | 0.08 | 0.08 | 0.02  | 0.03 | 0.13  | 0.13 | 0.04  | 0.05 |
| 1                 | 0.75 | 0.16 | 0.07 | 0.08 | 0.02  | 0.03 | 0.13  | 0.13 | 0.03  | 0.05 |
| 2                 | 0.8  | 0.16 | 0.03 | 0.07 | 0     | 0.02 | 0.14  | 0.14 | 0.03  | 0.05 |
| 3                 | 0.8  | 0.16 | 0.03 | 0.07 | 0     | 0    | 0.14  | 0.14 | 0.02  | 0.04 |
| 4                 | 0.82 | 0.16 | 0.03 | 0.07 | 0     | 0    | 0.13  | 0.14 | 0.02  | 0.04 |
| 5                 | 0.84 | 0.16 | 0.03 | 0.07 | 0     | 0    | 0.11  | 0.14 | 0.02  | 0.04 |
| 6                 | 0.85 | 0.16 | 0.05 | 0.1  | 0     | 0    | 0.08  | 0.13 | 0.02  | 0.04 |
| 7                 | 0.86 | 0.16 | 0.05 | 0.1  | 0     | 0    | 0.07  | 0.13 | 0.02  | 0.04 |
| 8                 | 0.88 | 0.15 | 0.06 | 0.1  | 0     | 0    | 0.05  | 0.12 | 0.01  | 0.04 |
| 9                 | 0.86 | 0.17 | 0.06 | 0.1  | 0     | 0    | 0.07  | 0.14 | 0.01  | 0.04 |
| 10                | 0.87 | 0.17 | 0.04 | 0.09 | 0     | 0    | 0.08  | 0.14 | 0.01  | 0.03 |
| 11                | 0.85 | 0.18 | 0.06 | 0.12 | 0     | 0    | 0.08  | 0.14 | 0.01  | 0.03 |
| 12                | 0.85 | 0.18 | 0.06 | 0.12 | 0     | 0    | 0.08  | 0.14 | 0.01  | 0.03 |

**age=50 years, timing allo <6 months, cmv=D-/R-, graft=BM, In vivo Tcell depletion=no,**

| Landmark time (y) | GRFS | se   | GF   | se   | AGVHD | se   | CGVHD | se   | Death | se   |
|-------------------|------|------|------|------|-------|------|-------|------|-------|------|
| 0                 | 0.65 | 0.21 | 0.09 | 0.1  | 0.02  | 0.04 | 0.18  | 0.19 | 0.06  | 0.08 |
| 1                 | 0.67 | 0.22 | 0.08 | 0.11 | 0.02  | 0.04 | 0.18  | 0.2  | 0.05  | 0.07 |
| 2                 | 0.72 | 0.23 | 0.03 | 0.08 | 0     | 0.02 | 0.2   | 0.21 | 0.04  | 0.08 |
| 3                 | 0.73 | 0.23 | 0.03 | 0.08 | 0     | 0    | 0.2   | 0.22 | 0.03  | 0.07 |
| 4                 | 0.75 | 0.23 | 0.03 | 0.08 | 0     | 0    | 0.19  | 0.22 | 0.03  | 0.07 |
| 5                 | 0.79 | 0.24 | 0.04 | 0.09 | 0     | 0    | 0.15  | 0.22 | 0.03  | 0.07 |
| 6                 | 0.8  | 0.24 | 0.06 | 0.12 | 0     | 0    | 0.12  | 0.21 | 0.03  | 0.07 |
| 7                 | 0.82 | 0.23 | 0.06 | 0.12 | 0     | 0    | 0.1   | 0.2  | 0.03  | 0.07 |
| 8                 | 0.84 | 0.23 | 0.06 | 0.13 | 0     | 0    | 0.08  | 0.19 | 0.02  | 0.07 |
| 9                 | 0.81 | 0.25 | 0.06 | 0.13 | 0     | 0    | 0.11  | 0.23 | 0.02  | 0.07 |
| 10                | 0.83 | 0.25 | 0.05 | 0.11 | 0     | 0    | 0.11  | 0.23 | 0.02  | 0.06 |
| 11                | 0.81 | 0.26 | 0.07 | 0.15 | 0     | 0    | 0.11  | 0.23 | 0.02  | 0.06 |
| 12                | 0.81 | 0.26 | 0.07 | 0.15 | 0     | 0    | 0.11  | 0.23 | 0.02  | 0.06 |

**age=10 years, timing allo >6 months, cmv=others, graft=BM, In vivo Tcell depletion=no,**

| Landmark time (y) | GRFS | se   | GF   | se   | AGVHD | se   | CGVHD | se   | Death | se   |
|-------------------|------|------|------|------|-------|------|-------|------|-------|------|
| 0                 | 0.52 | 0.16 | 0.22 | 0.14 | 0.03  | 0.04 | 0.1   | 0.09 | 0.13  | 0.09 |
| 1                 | 0.57 | 0.17 | 0.2  | 0.15 | 0.03  | 0.04 | 0.11  | 0.09 | 0.09  | 0.09 |
| 2                 | 0.68 | 0.18 | 0.09 | 0.13 | 0.01  | 0.03 | 0.13  | 0.11 | 0.09  | 0.1  |
| 3                 | 0.7  | 0.18 | 0.09 | 0.13 | 0     | 0    | 0.14  | 0.11 | 0.08  | 0.09 |
| 4                 | 0.72 | 0.18 | 0.09 | 0.13 | 0     | 0    | 0.13  | 0.12 | 0.07  | 0.09 |
| 5                 | 0.75 | 0.18 | 0.09 | 0.14 | 0     | 0    | 0.1   | 0.11 | 0.06  | 0.09 |
| 6                 | 0.71 | 0.21 | 0.15 | 0.18 | 0     | 0    | 0.08  | 0.11 | 0.06  | 0.09 |
| 7                 | 0.72 | 0.21 | 0.15 | 0.18 | 0     | 0    | 0.06  | 0.1  | 0.06  | 0.09 |
| 8                 | 0.75 | 0.21 | 0.16 | 0.19 | 0     | 0    | 0.05  | 0.09 | 0.05  | 0.08 |

|    |      |      |      |      |   |   |      |      |      |      |
|----|------|------|------|------|---|---|------|------|------|------|
| 9  | 0.73 | 0.21 | 0.16 | 0.19 | 0 | 0 | 0.07 | 0.11 | 0.05 | 0.08 |
| 10 | 0.78 | 0.21 | 0.12 | 0.17 | 0 | 0 | 0.07 | 0.12 | 0.04 | 0.08 |
| 11 | 0.71 | 0.24 | 0.18 | 0.22 | 0 | 0 | 0.07 | 0.12 | 0.04 | 0.08 |
| 12 | 0.71 | 0.24 | 0.18 | 0.22 | 0 | 0 | 0.07 | 0.12 | 0.04 | 0.08 |

**age=20 years, timing allo >6 months, cmv=others, graft=BM, In vivo Tcell depletion=no,**

| Landmark time (y) | GRFS | se   | GF   | se   | AGVHD | se   | CGVHD | se   | Death | se   |
|-------------------|------|------|------|------|-------|------|-------|------|-------|------|
| 0                 | 0.41 | 0.15 | 0.23 | 0.13 | 0.04  | 0.04 | 0.13  | 0.1  | 0.2   | 0.11 |
| 1                 | 0.47 | 0.17 | 0.22 | 0.14 | 0.03  | 0.05 | 0.14  | 0.11 | 0.14  | 0.11 |
| 2                 | 0.59 | 0.19 | 0.09 | 0.12 | 0.01  | 0.03 | 0.18  | 0.13 | 0.14  | 0.13 |
| 3                 | 0.6  | 0.19 | 0.09 | 0.12 | 0     | 0    | 0.19  | 0.14 | 0.12  | 0.13 |
| 4                 | 0.63 | 0.2  | 0.09 | 0.12 | 0     | 0    | 0.17  | 0.14 | 0.11  | 0.13 |
| 5                 | 0.67 | 0.2  | 0.1  | 0.13 | 0     | 0    | 0.14  | 0.14 | 0.09  | 0.12 |
| 6                 | 0.64 | 0.22 | 0.16 | 0.17 | 0     | 0    | 0.11  | 0.13 | 0.09  | 0.13 |
| 7                 | 0.66 | 0.22 | 0.16 | 0.17 | 0     | 0    | 0.09  | 0.12 | 0.1   | 0.13 |
| 8                 | 0.69 | 0.22 | 0.17 | 0.18 | 0     | 0    | 0.07  | 0.12 | 0.08  | 0.12 |
| 9                 | 0.66 | 0.23 | 0.17 | 0.18 | 0     | 0    | 0.09  | 0.13 | 0.08  | 0.12 |
| 10                | 0.72 | 0.23 | 0.13 | 0.17 | 0     | 0    | 0.1   | 0.14 | 0.06  | 0.11 |
| 11                | 0.65 | 0.24 | 0.19 | 0.21 | 0     | 0    | 0.1   | 0.14 | 0.06  | 0.11 |
| 12                | 0.65 | 0.24 | 0.19 | 0.21 | 0     | 0    | 0.1   | 0.14 | 0.06  | 0.11 |

**age=30 years, timing allo >6 months, cmv=others, graft=BM, In vivo Tcell depletion=no,**

| Landmark time (y) | GRFS | se   | GF   | se   | AGVHD | se   | CGVHD | se   | Death | se   |
|-------------------|------|------|------|------|-------|------|-------|------|-------|------|
| 0                 | 0.3  | 0.15 | 0.23 | 0.13 | 0.04  | 0.05 | 0.15  | 0.11 | 0.28  | 0.14 |
| 1                 | 0.35 | 0.17 | 0.23 | 0.15 | 0.04  | 0.05 | 0.18  | 0.13 | 0.2   | 0.15 |
| 2                 | 0.47 | 0.21 | 0.08 | 0.11 | 0.01  | 0.04 | 0.24  | 0.16 | 0.2   | 0.18 |
| 3                 | 0.49 | 0.22 | 0.09 | 0.12 | 0     | 0    | 0.25  | 0.17 | 0.18  | 0.18 |
| 4                 | 0.52 | 0.23 | 0.09 | 0.13 | 0     | 0    | 0.23  | 0.18 | 0.16  | 0.17 |
| 5                 | 0.57 | 0.24 | 0.1  | 0.14 | 0     | 0    | 0.19  | 0.18 | 0.14  | 0.17 |
| 6                 | 0.55 | 0.25 | 0.16 | 0.18 | 0     | 0    | 0.14  | 0.17 | 0.14  | 0.18 |
| 7                 | 0.57 | 0.25 | 0.17 | 0.18 | 0     | 0    | 0.12  | 0.16 | 0.15  | 0.19 |
| 8                 | 0.61 | 0.26 | 0.18 | 0.19 | 0     | 0    | 0.09  | 0.15 | 0.12  | 0.18 |
| 9                 | 0.58 | 0.26 | 0.18 | 0.19 | 0     | 0    | 0.12  | 0.17 | 0.12  | 0.18 |
| 10                | 0.64 | 0.27 | 0.13 | 0.19 | 0     | 0    | 0.13  | 0.19 | 0.09  | 0.17 |
| 11                | 0.57 | 0.28 | 0.2  | 0.22 | 0     | 0    | 0.13  | 0.19 | 0.09  | 0.17 |
| 12                | 0.57 | 0.28 | 0.2  | 0.22 | 0     | 0    | 0.13  | 0.19 | 0.09  | 0.17 |

**age=40 years, timing allo >6 months, cmv=others, graft=BM, In vivo Tcell depletion=no,**

| Landmark time (y) | GRFS | se   | GF   | se   | AGVHD | se   | CGVHD | se   | Death | se   |
|-------------------|------|------|------|------|-------|------|-------|------|-------|------|
| 0                 | 0.18 | 0.14 | 0.22 | 0.14 | 0.04  | 0.05 | 0.16  | 0.13 | 0.4   | 0.18 |
| 1                 | 0.23 | 0.18 | 0.24 | 0.17 | 0.04  | 0.06 | 0.21  | 0.16 | 0.28  | 0.2  |
| 2                 | 0.33 | 0.23 | 0.07 | 0.12 | 0.01  | 0.05 | 0.3   | 0.21 | 0.28  | 0.25 |
| 3                 | 0.35 | 0.24 | 0.08 | 0.12 | 0     | 0    | 0.32  | 0.22 | 0.25  | 0.25 |
| 4                 | 0.39 | 0.26 | 0.09 | 0.13 | 0     | 0    | 0.31  | 0.23 | 0.22  | 0.24 |

|    |      |      |      |      |   |   |      |      |      |      |
|----|------|------|------|------|---|---|------|------|------|------|
| 5  | 0.44 | 0.29 | 0.1  | 0.15 | 0 | 0 | 0.26 | 0.25 | 0.2  | 0.25 |
| 6  | 0.44 | 0.3  | 0.16 | 0.2  | 0 | 0 | 0.19 | 0.24 | 0.21 | 0.27 |
| 7  | 0.46 | 0.31 | 0.17 | 0.21 | 0 | 0 | 0.15 | 0.23 | 0.22 | 0.28 |
| 8  | 0.51 | 0.32 | 0.19 | 0.23 | 0 | 0 | 0.12 | 0.21 | 0.18 | 0.28 |
| 9  | 0.47 | 0.32 | 0.19 | 0.23 | 0 | 0 | 0.16 | 0.24 | 0.18 | 0.28 |
| 10 | 0.54 | 0.34 | 0.14 | 0.22 | 0 | 0 | 0.18 | 0.27 | 0.14 | 0.27 |
| 11 | 0.48 | 0.34 | 0.2  | 0.26 | 0 | 0 | 0.18 | 0.27 | 0.14 | 0.27 |
| 12 | 0.48 | 0.34 | 0.2  | 0.26 | 0 | 0 | 0.18 | 0.27 | 0.14 | 0.27 |

**age=50 years, timing allo >6 months, cmv=others, graft=BM, In vivo Tcell depletion=no,**

| Landmark time (y) | GRFS | se   | GF   | se   | AGVHD | se   | CGVHD | se   | Death | se   |
|-------------------|------|------|------|------|-------|------|-------|------|-------|------|
| 0                 | 0.08 | 0.11 | 0.2  | 0.15 | 0.04  | 0.05 | 0.15  | 0.14 | 0.52  | 0.22 |
| 1                 | 0.12 | 0.16 | 0.24 | 0.21 | 0.04  | 0.07 | 0.23  | 0.2  | 0.37  | 0.27 |
| 2                 | 0.19 | 0.23 | 0.06 | 0.11 | 0.01  | 0.06 | 0.35  | 0.27 | 0.38  | 0.33 |
| 3                 | 0.21 | 0.25 | 0.06 | 0.12 | 0     | 0    | 0.39  | 0.29 | 0.34  | 0.33 |
| 4                 | 0.24 | 0.28 | 0.07 | 0.14 | 0     | 0    | 0.39  | 0.31 | 0.3   | 0.33 |
| 5                 | 0.3  | 0.33 | 0.09 | 0.17 | 0     | 0    | 0.33  | 0.35 | 0.27  | 0.35 |
| 6                 | 0.3  | 0.34 | 0.15 | 0.22 | 0     | 0    | 0.24  | 0.34 | 0.31  | 0.39 |
| 7                 | 0.33 | 0.36 | 0.16 | 0.23 | 0     | 0    | 0.19  | 0.32 | 0.33  | 0.41 |
| 8                 | 0.39 | 0.4  | 0.18 | 0.26 | 0     | 0    | 0.15  | 0.3  | 0.28  | 0.42 |
| 9                 | 0.35 | 0.38 | 0.18 | 0.26 | 0     | 0    | 0.19  | 0.32 | 0.28  | 0.42 |
| 10                | 0.42 | 0.43 | 0.13 | 0.25 | 0     | 0    | 0.23  | 0.38 | 0.21  | 0.43 |
| 11                | 0.37 | 0.41 | 0.19 | 0.3  | 0     | 0    | 0.23  | 0.38 | 0.21  | 0.43 |
| 12                | 0.37 | 0.41 | 0.19 | 0.3  | 0     | 0    | 0.23  | 0.38 | 0.21  | 0.43 |

**age=10 years, timing allo <6 months, cmv=others, graft=BM, In vivo Tcell depletion=no,**

| Landmark time (y) | GRFS | se   | GF   | se   | AGVHD | se   | CGVHD | se   | Death | se   |
|-------------------|------|------|------|------|-------|------|-------|------|-------|------|
| 0                 | 0.81 | 0.07 | 0.07 | 0.04 | 0.02  | 0.02 | 0.07  | 0.04 | 0.04  | 0.03 |
| 1                 | 0.83 | 0.07 | 0.06 | 0.04 | 0.02  | 0.02 | 0.07  | 0.05 | 0.03  | 0.02 |
| 2                 | 0.87 | 0.06 | 0.03 | 0.03 | 0     | 0.01 | 0.07  | 0.05 | 0.02  | 0.02 |
| 3                 | 0.88 | 0.06 | 0.03 | 0.03 | 0     | 0    | 0.07  | 0.05 | 0.02  | 0.02 |
| 4                 | 0.89 | 0.06 | 0.03 | 0.03 | 0     | 0    | 0.07  | 0.05 | 0.02  | 0.02 |
| 5                 | 0.9  | 0.06 | 0.03 | 0.03 | 0     | 0    | 0.05  | 0.05 | 0.02  | 0.02 |
| 6                 | 0.9  | 0.06 | 0.04 | 0.05 | 0     | 0    | 0.04  | 0.04 | 0.02  | 0.02 |
| 7                 | 0.91 | 0.06 | 0.04 | 0.05 | 0     | 0    | 0.03  | 0.04 | 0.02  | 0.02 |
| 8                 | 0.92 | 0.06 | 0.04 | 0.05 | 0     | 0    | 0.03  | 0.04 | 0.01  | 0.02 |
| 9                 | 0.91 | 0.07 | 0.04 | 0.05 | 0     | 0    | 0.04  | 0.05 | 0.01  | 0.02 |
| 10                | 0.92 | 0.06 | 0.03 | 0.04 | 0     | 0    | 0.04  | 0.05 | 0.01  | 0.02 |
| 11                | 0.9  | 0.07 | 0.05 | 0.05 | 0     | 0    | 0.04  | 0.05 | 0.01  | 0.02 |
| 12                | 0.9  | 0.07 | 0.05 | 0.05 | 0     | 0    | 0.04  | 0.05 | 0.01  | 0.02 |

**age=20 years, timing allo <6 months, cmv=others, graft=BM, In vivo Tcell depletion=no,**

| Landmark time (y) | GRFS | se   | GF   | se   | AGVHD | se   | CGVHD | se   | Death | se   |
|-------------------|------|------|------|------|-------|------|-------|------|-------|------|
| 0                 | 0.75 | 0.07 | 0.07 | 0.04 | 0.02  | 0.02 | 0.09  | 0.05 | 0.06  | 0.04 |



|    |      |      |      |      |      |      |      |      |      |      |
|----|------|------|------|------|------|------|------|------|------|------|
| 1  | 0.78 | 0.07 | 0.07 | 0.04 | 0.02 | 0.02 | 0.1  | 0.06 | 0.04 | 0.03 |
| 2  | 0.83 | 0.07 | 0.03 | 0.03 | 0    | 0.01 | 0.1  | 0.06 | 0.04 | 0.03 |
| 3  | 0.83 | 0.07 | 0.03 | 0.03 | 0    | 0    | 0.1  | 0.06 | 0.03 | 0.03 |
| 4  | 0.85 | 0.07 | 0.03 | 0.03 | 0    | 0    | 0.1  | 0.06 | 0.03 | 0.03 |
| 5  | 0.87 | 0.07 | 0.03 | 0.03 | 0    | 0    | 0.08 | 0.06 | 0.02 | 0.03 |
| 6  | 0.87 | 0.07 | 0.05 | 0.04 | 0    | 0    | 0.06 | 0.05 | 0.02 | 0.03 |
| 7  | 0.88 | 0.07 | 0.05 | 0.05 | 0    | 0    | 0.05 | 0.05 | 0.03 | 0.03 |
| 8  | 0.89 | 0.07 | 0.05 | 0.05 | 0    | 0    | 0.04 | 0.05 | 0.02 | 0.03 |
| 9  | 0.88 | 0.07 | 0.05 | 0.05 | 0    | 0    | 0.05 | 0.06 | 0.02 | 0.03 |
| 10 | 0.89 | 0.07 | 0.04 | 0.04 | 0    | 0    | 0.05 | 0.06 | 0.01 | 0.02 |
| 11 | 0.87 | 0.08 | 0.06 | 0.05 | 0    | 0    | 0.05 | 0.06 | 0.01 | 0.02 |
| 12 | 0.87 | 0.08 | 0.06 | 0.05 | 0    | 0    | 0.05 | 0.06 | 0.01 | 0.02 |

**age=30 years, timing allo <6 months, cmv=others, graft=BM, In vivo Tcell depletion=no,**

| Landmark time (y) | GRFS | se   | GF   | se   | AGVHD | se   | CGVHD | se   | Death | se   |
|-------------------|------|------|------|------|-------|------|-------|------|-------|------|
| 0                 | 0.67 | 0.09 | 0.08 | 0.05 | 0.02  | 0.03 | 0.13  | 0.07 | 0.09  | 0.05 |
| 1                 | 0.71 | 0.1  | 0.07 | 0.05 | 0.02  | 0.03 | 0.13  | 0.08 | 0.07  | 0.05 |
| 2                 | 0.76 | 0.1  | 0.03 | 0.04 | 0.01  | 0.02 | 0.14  | 0.08 | 0.06  | 0.05 |
| 3                 | 0.77 | 0.1  | 0.03 | 0.04 | 0     | 0    | 0.15  | 0.08 | 0.05  | 0.05 |
| 4                 | 0.79 | 0.1  | 0.03 | 0.04 | 0     | 0    | 0.14  | 0.08 | 0.05  | 0.05 |
| 5                 | 0.82 | 0.1  | 0.03 | 0.04 | 0     | 0    | 0.11  | 0.08 | 0.04  | 0.05 |
| 6                 | 0.82 | 0.1  | 0.05 | 0.05 | 0     | 0    | 0.08  | 0.08 | 0.04  | 0.05 |
| 7                 | 0.84 | 0.1  | 0.05 | 0.05 | 0     | 0    | 0.07  | 0.07 | 0.04  | 0.05 |
| 8                 | 0.86 | 0.09 | 0.06 | 0.06 | 0     | 0    | 0.05  | 0.07 | 0.03  | 0.04 |
| 9                 | 0.84 | 0.1  | 0.06 | 0.06 | 0     | 0    | 0.08  | 0.08 | 0.03  | 0.04 |
| 10                | 0.86 | 0.1  | 0.04 | 0.05 | 0     | 0    | 0.08  | 0.08 | 0.02  | 0.04 |
| 11                | 0.84 | 0.11 | 0.06 | 0.06 | 0     | 0    | 0.08  | 0.08 | 0.02  | 0.04 |
| 12                | 0.84 | 0.11 | 0.06 | 0.06 | 0     | 0    | 0.08  | 0.08 | 0.02  | 0.04 |

**age=40 years, timing allo <6 months, cmv=others, graft=BM, In vivo Tcell depletion=no,**

| Landmark time (y) | GRFS | se   | GF   | se   | AGVHD | se   | CGVHD | se   | Death | se   |
|-------------------|------|------|------|------|-------|------|-------|------|-------|------|
| 0                 | 0.57 | 0.13 | 0.09 | 0.06 | 0.03  | 0.03 | 0.17  | 0.11 | 0.14  | 0.08 |
| 1                 | 0.61 | 0.14 | 0.08 | 0.06 | 0.02  | 0.03 | 0.18  | 0.12 | 0.1   | 0.08 |
| 2                 | 0.67 | 0.15 | 0.03 | 0.05 | 0.01  | 0.02 | 0.2   | 0.13 | 0.09  | 0.08 |
| 3                 | 0.69 | 0.15 | 0.03 | 0.05 | 0     | 0    | 0.2   | 0.13 | 0.08  | 0.08 |
| 4                 | 0.71 | 0.15 | 0.03 | 0.05 | 0     | 0    | 0.19  | 0.13 | 0.07  | 0.08 |
| 5                 | 0.75 | 0.15 | 0.03 | 0.05 | 0     | 0    | 0.15  | 0.13 | 0.06  | 0.08 |
| 6                 | 0.76 | 0.15 | 0.06 | 0.07 | 0     | 0    | 0.12  | 0.13 | 0.06  | 0.08 |
| 7                 | 0.78 | 0.15 | 0.06 | 0.07 | 0     | 0    | 0.1   | 0.12 | 0.06  | 0.08 |
| 8                 | 0.81 | 0.14 | 0.06 | 0.07 | 0     | 0    | 0.08  | 0.11 | 0.05  | 0.08 |
| 9                 | 0.78 | 0.16 | 0.06 | 0.07 | 0     | 0    | 0.11  | 0.13 | 0.05  | 0.08 |
| 10                | 0.81 | 0.16 | 0.04 | 0.07 | 0     | 0    | 0.11  | 0.14 | 0.04  | 0.07 |
| 11                | 0.78 | 0.16 | 0.07 | 0.09 | 0     | 0    | 0.11  | 0.14 | 0.04  | 0.07 |
| 12                | 0.78 | 0.16 | 0.07 | 0.09 | 0     | 0    | 0.11  | 0.14 | 0.04  | 0.07 |

**age=50 years, timing allo <6 months, cmv=others, graft=BM, In vivo Tcell depletion=no,**

| Landmark time (y) | GRFS | se   | GF   | se   | AGVHD | se   | CGVHD | se   | Death | se   |
|-------------------|------|------|------|------|-------|------|-------|------|-------|------|
| 0                 | 0.45 | 0.18 | 0.09 | 0.08 | 0.03  | 0.04 | 0.21  | 0.16 | 0.21  | 0.13 |
| 1                 | 0.5  | 0.2  | 0.09 | 0.08 | 0.03  | 0.04 | 0.24  | 0.18 | 0.15  | 0.13 |
| 2                 | 0.56 | 0.22 | 0.03 | 0.06 | 0.01  | 0.03 | 0.27  | 0.2  | 0.13  | 0.14 |
| 3                 | 0.58 | 0.22 | 0.03 | 0.06 | 0     | 0    | 0.27  | 0.2  | 0.12  | 0.13 |
| 4                 | 0.61 | 0.23 | 0.03 | 0.06 | 0     | 0    | 0.26  | 0.21 | 0.1   | 0.13 |
| 5                 | 0.66 | 0.24 | 0.04 | 0.07 | 0     | 0    | 0.21  | 0.22 | 0.09  | 0.13 |
| 6                 | 0.68 | 0.24 | 0.06 | 0.09 | 0     | 0    | 0.16  | 0.21 | 0.1   | 0.14 |
| 7                 | 0.71 | 0.24 | 0.06 | 0.1  | 0     | 0    | 0.13  | 0.2  | 0.1   | 0.14 |
| 8                 | 0.75 | 0.23 | 0.07 | 0.1  | 0     | 0    | 0.11  | 0.19 | 0.08  | 0.14 |
| 9                 | 0.71 | 0.25 | 0.07 | 0.1  | 0     | 0    | 0.15  | 0.22 | 0.08  | 0.14 |
| 10                | 0.74 | 0.26 | 0.05 | 0.09 | 0     | 0    | 0.15  | 0.23 | 0.06  | 0.12 |
| 11                | 0.72 | 0.26 | 0.07 | 0.12 | 0     | 0    | 0.15  | 0.23 | 0.06  | 0.12 |
| 12                | 0.72 | 0.26 | 0.07 | 0.12 | 0     | 0    | 0.15  | 0.23 | 0.06  | 0.12 |

**age=10 years, timing allo >6 months, cmv=D-/R-, graft=PBSC, In vivo Tcell depletion=no,**

| Landmark time (y) | GRFS | se   | GF   | se   | AGVHD | se   | CGVHD | se   | Death | se   |
|-------------------|------|------|------|------|-------|------|-------|------|-------|------|
| 0                 | 0.72 | 0.21 | 0.15 | 0.17 | 0.08  | 0.14 | 0.02  | 0.03 | 0.04  | 0.05 |
| 1                 | 0.75 | 0.22 | 0.13 | 0.18 | 0.07  | 0.14 | 0.02  | 0.03 | 0.03  | 0.05 |
| 2                 | 0.87 | 0.19 | 0.06 | 0.16 | 0.02  | 0.1  | 0.02  | 0.03 | 0.03  | 0.05 |
| 3                 | 0.89 | 0.17 | 0.06 | 0.16 | 0     | 0    | 0.02  | 0.03 | 0.02  | 0.05 |
| 4                 | 0.9  | 0.17 | 0.06 | 0.16 | 0     | 0    | 0.02  | 0.03 | 0.02  | 0.05 |
| 5                 | 0.9  | 0.17 | 0.06 | 0.16 | 0     | 0    | 0.02  | 0.03 | 0.02  | 0.05 |
| 6                 | 0.87 | 0.22 | 0.1  | 0.22 | 0     | 0    | 0.01  | 0.03 | 0.02  | 0.05 |
| 7                 | 0.87 | 0.22 | 0.1  | 0.22 | 0     | 0    | 0.01  | 0.03 | 0.02  | 0.05 |
| 8                 | 0.88 | 0.22 | 0.1  | 0.22 | 0     | 0    | 0.01  | 0.02 | 0.01  | 0.04 |
| 9                 | 0.87 | 0.22 | 0.1  | 0.22 | 0     | 0    | 0.01  | 0.03 | 0.01  | 0.04 |
| 10                | 0.9  | 0.21 | 0.08 | 0.2  | 0     | 0    | 0.01  | 0.03 | 0.01  | 0.04 |
| 11                | 0.86 | 0.26 | 0.12 | 0.26 | 0     | 0    | 0.01  | 0.03 | 0.01  | 0.04 |
| 12                | 0.86 | 0.26 | 0.12 | 0.26 | 0     | 0    | 0.01  | 0.03 | 0.01  | 0.04 |

**age=20 years, timing allo >6 months, cmv=D-/R-, graft=PBSC, In vivo Tcell depletion=no,**

| Landmark time (y) | GRFS | se   | GF   | se   | AGVHD | se   | CGVHD | se   | Death | se   |
|-------------------|------|------|------|------|-------|------|-------|------|-------|------|
| 0                 | 0.66 | 0.22 | 0.16 | 0.18 | 0.09  | 0.15 | 0.02  | 0.03 | 0.06  | 0.07 |
| 1                 | 0.71 | 0.23 | 0.15 | 0.19 | 0.08  | 0.15 | 0.02  | 0.04 | 0.04  | 0.07 |
| 2                 | 0.84 | 0.21 | 0.07 | 0.17 | 0.02  | 0.11 | 0.03  | 0.04 | 0.04  | 0.08 |
| 3                 | 0.86 | 0.19 | 0.07 | 0.17 | 0     | 0    | 0.03  | 0.04 | 0.04  | 0.08 |
| 4                 | 0.87 | 0.19 | 0.07 | 0.17 | 0     | 0    | 0.03  | 0.04 | 0.03  | 0.08 |
| 5                 | 0.88 | 0.19 | 0.07 | 0.17 | 0     | 0    | 0.02  | 0.04 | 0.03  | 0.07 |
| 6                 | 0.84 | 0.24 | 0.11 | 0.23 | 0     | 0    | 0.02  | 0.04 | 0.03  | 0.07 |
| 7                 | 0.85 | 0.24 | 0.11 | 0.23 | 0     | 0    | 0.01  | 0.04 | 0.03  | 0.07 |
| 8                 | 0.85 | 0.24 | 0.11 | 0.23 | 0     | 0    | 0.01  | 0.03 | 0.02  | 0.07 |

|    |      |      |      |      |   |   |      |      |      |      |
|----|------|------|------|------|---|---|------|------|------|------|
| 9  | 0.85 | 0.24 | 0.11 | 0.23 | 0 | 0 | 0.01 | 0.04 | 0.02 | 0.07 |
| 10 | 0.88 | 0.23 | 0.09 | 0.22 | 0 | 0 | 0.02 | 0.04 | 0.02 | 0.06 |
| 11 | 0.83 | 0.28 | 0.13 | 0.28 | 0 | 0 | 0.02 | 0.04 | 0.02 | 0.06 |
| 12 | 0.83 | 0.28 | 0.13 | 0.28 | 0 | 0 | 0.02 | 0.04 | 0.02 | 0.06 |

**age=30 years, timing allo >6 months, cmv=D-/R-, graft=PBSC, In vivo Tcell depletion=no,**

| Landmark time (y) | GRFS | se   | GF   | se   | AGVHD | se   | CGVHD | se   | Death | se   |
|-------------------|------|------|------|------|-------|------|-------|------|-------|------|
| 0                 | 0.6  | 0.23 | 0.17 | 0.19 | 0.1   | 0.16 | 0.03  | 0.04 | 0.1   | 0.11 |
| 1                 | 0.65 | 0.25 | 0.16 | 0.2  | 0.09  | 0.17 | 0.03  | 0.05 | 0.07  | 0.11 |
| 2                 | 0.79 | 0.24 | 0.07 | 0.18 | 0.03  | 0.12 | 0.04  | 0.06 | 0.07  | 0.13 |
| 3                 | 0.82 | 0.22 | 0.08 | 0.18 | 0     | 0    | 0.04  | 0.06 | 0.06  | 0.13 |
| 4                 | 0.83 | 0.22 | 0.08 | 0.19 | 0     | 0    | 0.04  | 0.06 | 0.05  | 0.12 |
| 5                 | 0.85 | 0.22 | 0.08 | 0.19 | 0     | 0    | 0.03  | 0.06 | 0.04  | 0.11 |
| 6                 | 0.81 | 0.27 | 0.13 | 0.25 | 0     | 0    | 0.02  | 0.05 | 0.05  | 0.11 |
| 7                 | 0.81 | 0.27 | 0.13 | 0.25 | 0     | 0    | 0.02  | 0.05 | 0.05  | 0.12 |
| 8                 | 0.82 | 0.27 | 0.13 | 0.26 | 0     | 0    | 0.01  | 0.05 | 0.04  | 0.11 |
| 9                 | 0.82 | 0.27 | 0.13 | 0.26 | 0     | 0    | 0.02  | 0.06 | 0.04  | 0.11 |
| 10                | 0.86 | 0.26 | 0.1  | 0.24 | 0     | 0    | 0.02  | 0.06 | 0.03  | 0.1  |
| 11                | 0.8  | 0.32 | 0.15 | 0.3  | 0     | 0    | 0.02  | 0.06 | 0.03  | 0.1  |
| 12                | 0.8  | 0.32 | 0.15 | 0.3  | 0     | 0    | 0.02  | 0.06 | 0.03  | 0.1  |

**age=40 years, timing allo >6 months, cmv=D-/R-, graft=PBSC, In vivo Tcell depletion=no,**

| Landmark time (y) | GRFS | se   | GF   | se   | AGVHD | se   | CGVHD | se   | Death | se   |
|-------------------|------|------|------|------|-------|------|-------|------|-------|------|
| 0                 | 0.51 | 0.26 | 0.19 | 0.2  | 0.11  | 0.18 | 0.04  | 0.06 | 0.15  | 0.16 |
| 1                 | 0.58 | 0.28 | 0.18 | 0.22 | 0.1   | 0.19 | 0.04  | 0.07 | 0.1   | 0.16 |
| 2                 | 0.73 | 0.29 | 0.08 | 0.2  | 0.03  | 0.14 | 0.06  | 0.08 | 0.11  | 0.19 |
| 3                 | 0.76 | 0.28 | 0.08 | 0.21 | 0     | 0    | 0.06  | 0.08 | 0.1   | 0.19 |
| 4                 | 0.78 | 0.28 | 0.08 | 0.21 | 0     | 0    | 0.05  | 0.09 | 0.08  | 0.19 |
| 5                 | 0.8  | 0.28 | 0.09 | 0.22 | 0     | 0    | 0.04  | 0.08 | 0.07  | 0.18 |
| 6                 | 0.76 | 0.32 | 0.14 | 0.28 | 0     | 0    | 0.03  | 0.08 | 0.07  | 0.18 |
| 7                 | 0.76 | 0.32 | 0.14 | 0.28 | 0     | 0    | 0.03  | 0.07 | 0.07  | 0.18 |
| 8                 | 0.78 | 0.32 | 0.14 | 0.29 | 0     | 0    | 0.02  | 0.07 | 0.06  | 0.17 |
| 9                 | 0.77 | 0.32 | 0.14 | 0.29 | 0     | 0    | 0.03  | 0.08 | 0.06  | 0.17 |
| 10                | 0.82 | 0.31 | 0.11 | 0.27 | 0     | 0    | 0.03  | 0.08 | 0.04  | 0.15 |
| 11                | 0.76 | 0.37 | 0.17 | 0.34 | 0     | 0    | 0.03  | 0.08 | 0.04  | 0.15 |
| 12                | 0.76 | 0.37 | 0.17 | 0.34 | 0     | 0    | 0.03  | 0.08 | 0.04  | 0.15 |

**age=50 years, timing allo >6 months, cmv=D-/R-, graft=PBSC, In vivo Tcell depletion=no,**

| Landmark time (y) | GRFS | se   | GF   | se   | AGVHD | se   | CGVHD | se   | Death | se   |
|-------------------|------|------|------|------|-------|------|-------|------|-------|------|
| 0                 | 0.42 | 0.28 | 0.19 | 0.22 | 0.12  | 0.2  | 0.05  | 0.08 | 0.22  | 0.23 |
| 1                 | 0.49 | 0.32 | 0.19 | 0.25 | 0.11  | 0.22 | 0.06  | 0.09 | 0.16  | 0.24 |
| 2                 | 0.65 | 0.36 | 0.08 | 0.22 | 0.03  | 0.17 | 0.08  | 0.11 | 0.16  | 0.29 |
| 3                 | 0.68 | 0.35 | 0.09 | 0.23 | 0     | 0    | 0.08  | 0.12 | 0.15  | 0.29 |
| 4                 | 0.7  | 0.36 | 0.09 | 0.24 | 0     | 0    | 0.08  | 0.12 | 0.13  | 0.29 |

|    |      |      |      |      |   |   |      |      |      |      |
|----|------|------|------|------|---|---|------|------|------|------|
| 5  | 0.74 | 0.36 | 0.09 | 0.25 | 0 | 0 | 0.06 | 0.12 | 0.11 | 0.28 |
| 6  | 0.7  | 0.4  | 0.15 | 0.32 | 0 | 0 | 0.05 | 0.11 | 0.11 | 0.28 |
| 7  | 0.7  | 0.4  | 0.15 | 0.32 | 0 | 0 | 0.04 | 0.1  | 0.11 | 0.28 |
| 8  | 0.73 | 0.4  | 0.15 | 0.33 | 0 | 0 | 0.03 | 0.1  | 0.09 | 0.26 |
| 9  | 0.72 | 0.4  | 0.15 | 0.33 | 0 | 0 | 0.04 | 0.11 | 0.09 | 0.26 |
| 10 | 0.78 | 0.39 | 0.12 | 0.32 | 0 | 0 | 0.04 | 0.12 | 0.07 | 0.25 |
| 11 | 0.71 | 0.44 | 0.18 | 0.39 | 0 | 0 | 0.04 | 0.12 | 0.07 | 0.25 |
| 12 | 0.71 | 0.44 | 0.18 | 0.39 | 0 | 0 | 0.04 | 0.12 | 0.07 | 0.25 |

**age=10 years, timing allo <6 months, cmv=D-/R-, graft=PBSC, In vivo Tcell depletion=no,**

| Landmark time (y) | GRFS | se   | GF   | se   | AGVHD | se   | CGVHD | se   | Death | se   |
|-------------------|------|------|------|------|-------|------|-------|------|-------|------|
| 0                 | 0.89 | 0.09 | 0.04 | 0.05 | 0.04  | 0.07 | 0.01  | 0.01 | 0.01  | 0.01 |
| 1                 | 0.91 | 0.09 | 0.04 | 0.05 | 0.03  | 0.07 | 0.01  | 0.01 | 0.01  | 0.01 |
| 2                 | 0.96 | 0.06 | 0.02 | 0.04 | 0.01  | 0.04 | 0.01  | 0.02 | 0.01  | 0.01 |
| 3                 | 0.97 | 0.05 | 0.02 | 0.04 | 0     | 0    | 0.01  | 0.02 | 0.01  | 0.01 |
| 4                 | 0.97 | 0.05 | 0.02 | 0.04 | 0     | 0    | 0.01  | 0.02 | 0.01  | 0.01 |
| 5                 | 0.97 | 0.05 | 0.02 | 0.04 | 0     | 0    | 0.01  | 0.01 | 0     | 0.01 |
| 6                 | 0.96 | 0.06 | 0.03 | 0.06 | 0     | 0    | 0.01  | 0.01 | 0     | 0.01 |
| 7                 | 0.96 | 0.06 | 0.03 | 0.06 | 0     | 0    | 0     | 0.01 | 0     | 0.01 |
| 8                 | 0.97 | 0.06 | 0.03 | 0.06 | 0     | 0    | 0     | 0.01 | 0     | 0.01 |
| 9                 | 0.96 | 0.06 | 0.03 | 0.06 | 0     | 0    | 0.01  | 0.01 | 0     | 0.01 |
| 10                | 0.97 | 0.06 | 0.02 | 0.05 | 0     | 0    | 0.01  | 0.01 | 0     | 0.01 |
| 11                | 0.96 | 0.07 | 0.03 | 0.07 | 0     | 0    | 0.01  | 0.01 | 0     | 0.01 |
| 12                | 0.96 | 0.07 | 0.03 | 0.07 | 0     | 0    | 0.01  | 0.01 | 0     | 0.01 |

**age=20 years, timing allo <6 months, cmv=D-/R-, graft=PBSC, In vivo Tcell depletion=no,**

| Landmark time (y) | GRFS | se   | GF   | se   | AGVHD | se   | CGVHD | se   | Death | se   |
|-------------------|------|------|------|------|-------|------|-------|------|-------|------|
| 0                 | 0.87 | 0.09 | 0.05 | 0.06 | 0.05  | 0.07 | 0.01  | 0.02 | 0.02  | 0.02 |
| 1                 | 0.89 | 0.09 | 0.04 | 0.06 | 0.04  | 0.07 | 0.01  | 0.02 | 0.01  | 0.02 |
| 2                 | 0.94 | 0.07 | 0.02 | 0.05 | 0.01  | 0.05 | 0.02  | 0.02 | 0.01  | 0.02 |
| 3                 | 0.96 | 0.06 | 0.02 | 0.05 | 0     | 0    | 0.02  | 0.02 | 0.01  | 0.02 |
| 4                 | 0.96 | 0.05 | 0.02 | 0.05 | 0     | 0    | 0.01  | 0.02 | 0.01  | 0.02 |
| 5                 | 0.96 | 0.05 | 0.02 | 0.05 | 0     | 0    | 0.01  | 0.02 | 0.01  | 0.02 |
| 6                 | 0.95 | 0.07 | 0.03 | 0.07 | 0     | 0    | 0.01  | 0.02 | 0.01  | 0.02 |
| 7                 | 0.95 | 0.07 | 0.03 | 0.07 | 0     | 0    | 0.01  | 0.02 | 0.01  | 0.02 |
| 8                 | 0.96 | 0.07 | 0.03 | 0.07 | 0     | 0    | 0.01  | 0.02 | 0.01  | 0.02 |
| 9                 | 0.96 | 0.07 | 0.03 | 0.07 | 0     | 0    | 0.01  | 0.02 | 0.01  | 0.02 |
| 10                | 0.97 | 0.06 | 0.02 | 0.06 | 0     | 0    | 0.01  | 0.02 | 0     | 0.01 |
| 11                | 0.95 | 0.08 | 0.04 | 0.08 | 0     | 0    | 0.01  | 0.02 | 0     | 0.01 |
| 12                | 0.95 | 0.08 | 0.04 | 0.08 | 0     | 0    | 0.01  | 0.02 | 0     | 0.01 |

**age=30 years, timing allo <6 months, cmv=D-/R-, graft=PBSC, In vivo Tcell depletion=no,**

| Landmark time (y) | GRFS | se   | GF   | se   | AGVHD | se   | CGVHD | se   | Death | se   |
|-------------------|------|------|------|------|-------|------|-------|------|-------|------|
| 0                 | 0.84 | 0.11 | 0.05 | 0.06 | 0.06  | 0.08 | 0.02  | 0.03 | 0.03  | 0.03 |

|    |      |      |      |      |      |      |      |      |      |      |
|----|------|------|------|------|------|------|------|------|------|------|
| 1  | 0.87 | 0.11 | 0.05 | 0.06 | 0.05 | 0.08 | 0.02 | 0.03 | 0.02 | 0.03 |
| 2  | 0.93 | 0.08 | 0.02 | 0.05 | 0.01 | 0.05 | 0.02 | 0.03 | 0.02 | 0.03 |
| 3  | 0.94 | 0.07 | 0.02 | 0.05 | 0    | 0    | 0.02 | 0.03 | 0.02 | 0.03 |
| 4  | 0.94 | 0.07 | 0.02 | 0.05 | 0    | 0    | 0.02 | 0.03 | 0.01 | 0.03 |
| 5  | 0.95 | 0.07 | 0.02 | 0.05 | 0    | 0    | 0.02 | 0.03 | 0.01 | 0.03 |
| 6  | 0.94 | 0.08 | 0.04 | 0.07 | 0    | 0    | 0.01 | 0.03 | 0.01 | 0.03 |
| 7  | 0.94 | 0.08 | 0.04 | 0.07 | 0    | 0    | 0.01 | 0.03 | 0.01 | 0.03 |
| 8  | 0.95 | 0.08 | 0.04 | 0.07 | 0    | 0    | 0.01 | 0.02 | 0.01 | 0.03 |
| 9  | 0.94 | 0.08 | 0.04 | 0.07 | 0    | 0    | 0.01 | 0.03 | 0.01 | 0.03 |
| 10 | 0.96 | 0.08 | 0.03 | 0.07 | 0    | 0    | 0.01 | 0.03 | 0.01 | 0.02 |
| 11 | 0.94 | 0.1  | 0.04 | 0.09 | 0    | 0    | 0.01 | 0.03 | 0.01 | 0.02 |
| 12 | 0.94 | 0.1  | 0.04 | 0.09 | 0    | 0    | 0.01 | 0.03 | 0.01 | 0.02 |

**age=40 years, timing allo <6 months, cmv=D-/R-, graft=PBSC, In vivo Tcell depletion=no,**

| Landmark time (y) | GRFS | se   | GF   | se   | AGVHD | se   | CGVHD | se   | Death | se   |
|-------------------|------|------|------|------|-------|------|-------|------|-------|------|
| 0                 | 0.81 | 0.13 | 0.06 | 0.07 | 0.06  | 0.1  | 0.03  | 0.04 | 0.04  | 0.05 |
| 1                 | 0.83 | 0.13 | 0.05 | 0.07 | 0.05  | 0.1  | 0.03  | 0.04 | 0.03  | 0.05 |
| 2                 | 0.9  | 0.11 | 0.02 | 0.06 | 0.01  | 0.06 | 0.03  | 0.04 | 0.03  | 0.05 |
| 3                 | 0.92 | 0.09 | 0.02 | 0.06 | 0     | 0    | 0.03  | 0.04 | 0.03  | 0.05 |
| 4                 | 0.93 | 0.09 | 0.02 | 0.06 | 0     | 0    | 0.03  | 0.04 | 0.02  | 0.05 |
| 5                 | 0.93 | 0.09 | 0.02 | 0.06 | 0     | 0    | 0.02  | 0.04 | 0.02  | 0.05 |
| 6                 | 0.92 | 0.1  | 0.04 | 0.09 | 0     | 0    | 0.02  | 0.04 | 0.02  | 0.05 |
| 7                 | 0.93 | 0.1  | 0.04 | 0.09 | 0     | 0    | 0.01  | 0.04 | 0.02  | 0.05 |
| 8                 | 0.93 | 0.1  | 0.04 | 0.09 | 0     | 0    | 0.01  | 0.03 | 0.01  | 0.04 |
| 9                 | 0.93 | 0.1  | 0.04 | 0.09 | 0     | 0    | 0.02  | 0.04 | 0.01  | 0.04 |
| 10                | 0.94 | 0.1  | 0.03 | 0.08 | 0     | 0    | 0.02  | 0.04 | 0.01  | 0.04 |
| 11                | 0.93 | 0.12 | 0.05 | 0.11 | 0     | 0    | 0.02  | 0.04 | 0.01  | 0.04 |
| 12                | 0.93 | 0.12 | 0.05 | 0.11 | 0     | 0    | 0.02  | 0.04 | 0.01  | 0.04 |

**age=50 years, timing allo <6 months, cmv=D-/R-, graft=PBSC, In vivo Tcell depletion=no,**

| Landmark time (y) | GRFS | se   | GF   | se   | AGVHD | se   | CGVHD | se   | Death | se   |
|-------------------|------|------|------|------|-------|------|-------|------|-------|------|
| 0                 | 0.76 | 0.16 | 0.07 | 0.09 | 0.07  | 0.11 | 0.04  | 0.06 | 0.07  | 0.08 |
| 1                 | 0.79 | 0.16 | 0.06 | 0.09 | 0.06  | 0.12 | 0.04  | 0.06 | 0.05  | 0.08 |
| 2                 | 0.87 | 0.14 | 0.03 | 0.07 | 0.02  | 0.08 | 0.04  | 0.06 | 0.04  | 0.08 |
| 3                 | 0.89 | 0.13 | 0.03 | 0.07 | 0     | 0    | 0.05  | 0.07 | 0.04  | 0.08 |
| 4                 | 0.9  | 0.12 | 0.03 | 0.08 | 0     | 0    | 0.04  | 0.07 | 0.03  | 0.08 |
| 5                 | 0.91 | 0.12 | 0.03 | 0.08 | 0     | 0    | 0.03  | 0.06 | 0.03  | 0.08 |
| 6                 | 0.9  | 0.14 | 0.04 | 0.1  | 0     | 0    | 0.03  | 0.06 | 0.03  | 0.08 |
| 7                 | 0.91 | 0.14 | 0.04 | 0.1  | 0     | 0    | 0.02  | 0.06 | 0.03  | 0.08 |
| 8                 | 0.92 | 0.13 | 0.04 | 0.11 | 0     | 0    | 0.02  | 0.05 | 0.02  | 0.07 |
| 9                 | 0.91 | 0.14 | 0.04 | 0.11 | 0     | 0    | 0.02  | 0.06 | 0.02  | 0.07 |
| 10                | 0.93 | 0.13 | 0.03 | 0.1  | 0     | 0    | 0.02  | 0.06 | 0.02  | 0.06 |
| 11                | 0.91 | 0.15 | 0.05 | 0.13 | 0     | 0    | 0.02  | 0.06 | 0.02  | 0.06 |
| 12                | 0.91 | 0.15 | 0.05 | 0.13 | 0     | 0    | 0.02  | 0.06 | 0.02  | 0.06 |

**age=10 years, timing allo >6 months, cmv=others, graft=PBSC, In vivo Tcell depletion=no,**

| Landmark time (y) | GRFS | se   | GF   | se   | AGVHD | se   | CGVHD | se   | Death | se   |
|-------------------|------|------|------|------|-------|------|-------|------|-------|------|
| 0                 | 0.58 | 0.2  | 0.15 | 0.14 | 0.12  | 0.16 | 0.02  | 0.03 | 0.14  | 0.11 |
| 1                 | 0.64 | 0.22 | 0.14 | 0.15 | 0.1   | 0.17 | 0.02  | 0.03 | 0.1   | 0.12 |
| 2                 | 0.78 | 0.21 | 0.06 | 0.14 | 0.03  | 0.12 | 0.03  | 0.04 | 0.1   | 0.13 |
| 3                 | 0.82 | 0.19 | 0.07 | 0.14 | 0     | 0    | 0.03  | 0.04 | 0.09  | 0.13 |
| 4                 | 0.83 | 0.19 | 0.07 | 0.14 | 0     | 0    | 0.03  | 0.04 | 0.08  | 0.13 |
| 5                 | 0.84 | 0.19 | 0.07 | 0.15 | 0     | 0    | 0.02  | 0.04 | 0.06  | 0.12 |
| 6                 | 0.81 | 0.22 | 0.11 | 0.19 | 0     | 0    | 0.02  | 0.04 | 0.06  | 0.12 |
| 7                 | 0.81 | 0.22 | 0.11 | 0.19 | 0     | 0    | 0.01  | 0.04 | 0.07  | 0.12 |
| 8                 | 0.83 | 0.22 | 0.11 | 0.2  | 0     | 0    | 0.01  | 0.03 | 0.05  | 0.11 |
| 9                 | 0.82 | 0.22 | 0.11 | 0.2  | 0     | 0    | 0.01  | 0.04 | 0.05  | 0.11 |
| 10                | 0.86 | 0.21 | 0.08 | 0.18 | 0     | 0    | 0.02  | 0.04 | 0.04  | 0.1  |
| 11                | 0.81 | 0.25 | 0.13 | 0.24 | 0     | 0    | 0.02  | 0.04 | 0.04  | 0.1  |
| 12                | 0.81 | 0.25 | 0.13 | 0.24 | 0     | 0    | 0.02  | 0.04 | 0.04  | 0.1  |

**age=20 years, timing allo >6 months, cmv=others, graft=PBSC, In vivo Tcell depletion=no,**

| Landmark time (y) | GRFS | se   | GF   | se   | AGVHD | se   | CGVHD | se   | Death | se   |
|-------------------|------|------|------|------|-------|------|-------|------|-------|------|
| 0                 | 0.48 | 0.2  | 0.16 | 0.13 | 0.13  | 0.15 | 0.03  | 0.04 | 0.2   | 0.14 |
| 1                 | 0.55 | 0.22 | 0.15 | 0.15 | 0.11  | 0.17 | 0.03  | 0.04 | 0.15  | 0.15 |
| 2                 | 0.71 | 0.23 | 0.07 | 0.13 | 0.03  | 0.13 | 0.04  | 0.05 | 0.15  | 0.18 |
| 3                 | 0.75 | 0.22 | 0.07 | 0.14 | 0     | 0    | 0.04  | 0.05 | 0.14  | 0.18 |
| 4                 | 0.77 | 0.22 | 0.07 | 0.14 | 0     | 0    | 0.04  | 0.05 | 0.12  | 0.17 |
| 5                 | 0.79 | 0.21 | 0.08 | 0.15 | 0     | 0    | 0.03  | 0.05 | 0.1   | 0.17 |
| 6                 | 0.75 | 0.24 | 0.12 | 0.19 | 0     | 0    | 0.02  | 0.05 | 0.1   | 0.17 |
| 7                 | 0.76 | 0.24 | 0.12 | 0.19 | 0     | 0    | 0.02  | 0.05 | 0.1   | 0.17 |
| 8                 | 0.78 | 0.24 | 0.12 | 0.2  | 0     | 0    | 0.01  | 0.04 | 0.08  | 0.16 |
| 9                 | 0.77 | 0.24 | 0.12 | 0.2  | 0     | 0    | 0.02  | 0.05 | 0.08  | 0.16 |
| 10                | 0.83 | 0.23 | 0.09 | 0.18 | 0     | 0    | 0.02  | 0.05 | 0.06  | 0.14 |
| 11                | 0.77 | 0.26 | 0.15 | 0.23 | 0     | 0    | 0.02  | 0.05 | 0.06  | 0.14 |
| 12                | 0.77 | 0.26 | 0.15 | 0.23 | 0     | 0    | 0.02  | 0.05 | 0.06  | 0.14 |

**age=30 years, timing allo >6 months, cmv=others, graft=PBSC, In vivo Tcell depletion=no,**

| Landmark time (y) | GRFS | se   | GF   | se   | AGVHD | se   | CGVHD | se   | Death | se   |
|-------------------|------|------|------|------|-------|------|-------|------|-------|------|
| 0                 | 0.37 | 0.19 | 0.16 | 0.13 | 0.14  | 0.15 | 0.03  | 0.04 | 0.3   | 0.18 |
| 1                 | 0.45 | 0.23 | 0.16 | 0.15 | 0.13  | 0.17 | 0.04  | 0.05 | 0.22  | 0.19 |
| 2                 | 0.61 | 0.26 | 0.07 | 0.13 | 0.04  | 0.14 | 0.05  | 0.07 | 0.23  | 0.24 |
| 3                 | 0.66 | 0.26 | 0.07 | 0.14 | 0     | 0    | 0.06  | 0.07 | 0.21  | 0.24 |
| 4                 | 0.68 | 0.26 | 0.08 | 0.14 | 0     | 0    | 0.05  | 0.07 | 0.19  | 0.24 |
| 5                 | 0.72 | 0.26 | 0.08 | 0.15 | 0     | 0    | 0.04  | 0.07 | 0.16  | 0.23 |
| 6                 | 0.68 | 0.28 | 0.13 | 0.19 | 0     | 0    | 0.03  | 0.06 | 0.16  | 0.23 |
| 7                 | 0.68 | 0.28 | 0.13 | 0.19 | 0     | 0    | 0.03  | 0.06 | 0.16  | 0.24 |
| 8                 | 0.72 | 0.28 | 0.13 | 0.2  | 0     | 0    | 0.02  | 0.05 | 0.13  | 0.22 |

|    |      |      |      |      |   |   |      |      |      |      |
|----|------|------|------|------|---|---|------|------|------|------|
| 9  | 0.71 | 0.28 | 0.13 | 0.2  | 0 | 0 | 0.03 | 0.07 | 0.13 | 0.22 |
| 10 | 0.77 | 0.27 | 0.1  | 0.19 | 0 | 0 | 0.03 | 0.07 | 0.09 | 0.21 |
| 11 | 0.72 | 0.3  | 0.16 | 0.24 | 0 | 0 | 0.03 | 0.07 | 0.09 | 0.21 |
| 12 | 0.72 | 0.3  | 0.16 | 0.24 | 0 | 0 | 0.03 | 0.07 | 0.09 | 0.21 |

**age=40 years, timing allo >6 months, cmv=others, graft=PBSC, In vivo Tcell depletion=no,**

| Landmark time (y) | GRFS | se   | GF   | se   | AGVHD | se   | CGVHD | se   | Death | se   |
|-------------------|------|------|------|------|-------|------|-------|------|-------|------|
| 0                 | 0.25 | 0.18 | 0.16 | 0.12 | 0.14  | 0.15 | 0.04  | 0.05 | 0.42  | 0.21 |
| 1                 | 0.33 | 0.24 | 0.17 | 0.16 | 0.14  | 0.19 | 0.05  | 0.06 | 0.31  | 0.24 |
| 2                 | 0.49 | 0.3  | 0.07 | 0.13 | 0.04  | 0.15 | 0.07  | 0.08 | 0.34  | 0.31 |
| 3                 | 0.53 | 0.31 | 0.07 | 0.14 | 0     | 0    | 0.08  | 0.09 | 0.32  | 0.32 |
| 4                 | 0.57 | 0.32 | 0.08 | 0.15 | 0     | 0    | 0.07  | 0.09 | 0.28  | 0.32 |
| 5                 | 0.61 | 0.33 | 0.08 | 0.16 | 0     | 0    | 0.06  | 0.1  | 0.24  | 0.32 |
| 6                 | 0.58 | 0.34 | 0.13 | 0.2  | 0     | 0    | 0.04  | 0.09 | 0.24  | 0.33 |
| 7                 | 0.59 | 0.34 | 0.13 | 0.2  | 0     | 0    | 0.03  | 0.08 | 0.25  | 0.33 |
| 8                 | 0.63 | 0.34 | 0.14 | 0.22 | 0     | 0    | 0.03  | 0.07 | 0.2   | 0.32 |
| 9                 | 0.62 | 0.34 | 0.14 | 0.22 | 0     | 0    | 0.04  | 0.09 | 0.2   | 0.32 |
| 10                | 0.7  | 0.34 | 0.11 | 0.21 | 0     | 0    | 0.04  | 0.1  | 0.15  | 0.31 |
| 11                | 0.64 | 0.35 | 0.17 | 0.26 | 0     | 0    | 0.04  | 0.1  | 0.15  | 0.31 |
| 12                | 0.64 | 0.35 | 0.17 | 0.26 | 0     | 0    | 0.04  | 0.1  | 0.15  | 0.31 |

**age=50 years, timing allo >6 months, cmv=others, graft=PBSC, In vivo Tcell depletion=no,**

| Landmark time (y) | GRFS | se   | GF   | se   | AGVHD | se   | CGVHD | se   | Death | se   |
|-------------------|------|------|------|------|-------|------|-------|------|-------|------|
| 0                 | 0.14 | 0.15 | 0.14 | 0.12 | 0.14  | 0.15 | 0.03  | 0.05 | 0.55  | 0.23 |
| 1                 | 0.21 | 0.23 | 0.17 | 0.17 | 0.15  | 0.21 | 0.05  | 0.07 | 0.41  | 0.29 |
| 2                 | 0.33 | 0.33 | 0.06 | 0.12 | 0.05  | 0.18 | 0.09  | 0.11 | 0.47  | 0.38 |
| 3                 | 0.38 | 0.36 | 0.07 | 0.14 | 0     | 0    | 0.1   | 0.12 | 0.45  | 0.4  |
| 4                 | 0.42 | 0.38 | 0.07 | 0.15 | 0     | 0    | 0.1   | 0.13 | 0.41  | 0.42 |
| 5                 | 0.48 | 0.41 | 0.08 | 0.17 | 0     | 0    | 0.08  | 0.13 | 0.36  | 0.43 |
| 6                 | 0.45 | 0.41 | 0.13 | 0.21 | 0     | 0    | 0.06  | 0.12 | 0.36  | 0.44 |
| 7                 | 0.46 | 0.41 | 0.13 | 0.22 | 0     | 0    | 0.04  | 0.11 | 0.37  | 0.45 |
| 8                 | 0.52 | 0.43 | 0.14 | 0.24 | 0     | 0    | 0.03  | 0.1  | 0.3   | 0.45 |
| 9                 | 0.51 | 0.42 | 0.14 | 0.24 | 0     | 0    | 0.05  | 0.11 | 0.3   | 0.45 |
| 10                | 0.6  | 0.44 | 0.11 | 0.23 | 0     | 0    | 0.05  | 0.13 | 0.24  | 0.46 |
| 11                | 0.55 | 0.44 | 0.16 | 0.29 | 0     | 0    | 0.05  | 0.13 | 0.24  | 0.46 |
| 12                | 0.55 | 0.44 | 0.16 | 0.29 | 0     | 0    | 0.05  | 0.13 | 0.24  | 0.46 |

**age=10 years, timing allo <6 months, cmv=others, graft=PBSC, In vivo Tcell depletion=no,**

| Landmark time (y) | GRFS | se   | GF   | se   | AGVHD | se   | CGVHD | se   | Death | se   |
|-------------------|------|------|------|------|-------|------|-------|------|-------|------|
| 0                 | 0.84 | 0.1  | 0.05 | 0.05 | 0.06  | 0.09 | 0.01  | 0.02 | 0.04  | 0.03 |
| 1                 | 0.86 | 0.1  | 0.04 | 0.05 | 0.05  | 0.09 | 0.01  | 0.02 | 0.03  | 0.03 |
| 2                 | 0.93 | 0.08 | 0.02 | 0.04 | 0.01  | 0.06 | 0.02  | 0.02 | 0.03  | 0.03 |
| 3                 | 0.94 | 0.06 | 0.02 | 0.04 | 0     | 0    | 0.02  | 0.02 | 0.02  | 0.03 |
| 4                 | 0.95 | 0.06 | 0.02 | 0.04 | 0     | 0    | 0.01  | 0.02 | 0.02  | 0.03 |

|    |      |      |      |      |   |   |      |      |      |      |
|----|------|------|------|------|---|---|------|------|------|------|
| 5  | 0.95 | 0.05 | 0.02 | 0.04 | 0 | 0 | 0.01 | 0.02 | 0.02 | 0.03 |
| 6  | 0.94 | 0.07 | 0.03 | 0.06 | 0 | 0 | 0.01 | 0.02 | 0.02 | 0.03 |
| 7  | 0.95 | 0.07 | 0.03 | 0.06 | 0 | 0 | 0.01 | 0.02 | 0.02 | 0.03 |
| 8  | 0.95 | 0.06 | 0.03 | 0.06 | 0 | 0 | 0.01 | 0.02 | 0.01 | 0.03 |
| 9  | 0.95 | 0.06 | 0.03 | 0.06 | 0 | 0 | 0.01 | 0.02 | 0.01 | 0.03 |
| 10 | 0.96 | 0.06 | 0.02 | 0.05 | 0 | 0 | 0.01 | 0.02 | 0.01 | 0.02 |
| 11 | 0.95 | 0.07 | 0.04 | 0.07 | 0 | 0 | 0.01 | 0.02 | 0.01 | 0.02 |
| 12 | 0.95 | 0.07 | 0.04 | 0.07 | 0 | 0 | 0.01 | 0.02 | 0.01 | 0.02 |

**age=20 years, timing allo <6 months, cmv=others, graft=PBSC, In vivo Tcell depletion=no,**

| Landmark time (y) | GRFS | se   | GF   | se   | AGVHD | se   | CGVHD | se   | Death | se   |
|-------------------|------|------|------|------|-------|------|-------|------|-------|------|
| 0                 | 0.8  | 0.1  | 0.05 | 0.05 | 0.07  | 0.09 | 0.02  | 0.02 | 0.06  | 0.05 |
| 1                 | 0.83 | 0.11 | 0.05 | 0.05 | 0.06  | 0.09 | 0.02  | 0.02 | 0.05  | 0.05 |
| 2                 | 0.9  | 0.09 | 0.02 | 0.04 | 0.02  | 0.06 | 0.02  | 0.03 | 0.04  | 0.05 |
| 3                 | 0.92 | 0.07 | 0.02 | 0.04 | 0     | 0    | 0.02  | 0.03 | 0.04  | 0.05 |
| 4                 | 0.93 | 0.07 | 0.02 | 0.04 | 0     | 0    | 0.02  | 0.03 | 0.03  | 0.05 |
| 5                 | 0.94 | 0.06 | 0.02 | 0.04 | 0     | 0    | 0.02  | 0.03 | 0.03  | 0.04 |
| 6                 | 0.93 | 0.07 | 0.04 | 0.06 | 0     | 0    | 0.01  | 0.02 | 0.03  | 0.04 |
| 7                 | 0.93 | 0.07 | 0.04 | 0.06 | 0     | 0    | 0.01  | 0.02 | 0.03  | 0.04 |
| 8                 | 0.94 | 0.07 | 0.04 | 0.06 | 0     | 0    | 0.01  | 0.02 | 0.02  | 0.04 |
| 9                 | 0.93 | 0.07 | 0.04 | 0.06 | 0     | 0    | 0.01  | 0.03 | 0.02  | 0.04 |
| 10                | 0.95 | 0.07 | 0.03 | 0.05 | 0     | 0    | 0.01  | 0.03 | 0.01  | 0.03 |
| 11                | 0.93 | 0.08 | 0.04 | 0.07 | 0     | 0    | 0.01  | 0.03 | 0.01  | 0.03 |
| 12                | 0.93 | 0.08 | 0.04 | 0.07 | 0     | 0    | 0.01  | 0.03 | 0.01  | 0.03 |

**age=30 years, timing allo <6 months, cmv=others, graft=PBSC, In vivo Tcell depletion=no,**

| Landmark time (y) | GRFS | se   | GF   | se   | AGVHD | se   | CGVHD | se   | Death | se   |
|-------------------|------|------|------|------|-------|------|-------|------|-------|------|
| 0                 | 0.74 | 0.12 | 0.06 | 0.05 | 0.08  | 0.09 | 0.03  | 0.03 | 0.1   | 0.07 |
| 1                 | 0.78 | 0.12 | 0.05 | 0.05 | 0.07  | 0.09 | 0.03  | 0.03 | 0.07  | 0.07 |
| 2                 | 0.86 | 0.1  | 0.02 | 0.04 | 0.02  | 0.06 | 0.03  | 0.04 | 0.06  | 0.07 |
| 3                 | 0.89 | 0.09 | 0.02 | 0.04 | 0     | 0    | 0.03  | 0.04 | 0.06  | 0.07 |
| 4                 | 0.9  | 0.09 | 0.02 | 0.05 | 0     | 0    | 0.03  | 0.04 | 0.05  | 0.07 |
| 5                 | 0.91 | 0.08 | 0.02 | 0.05 | 0     | 0    | 0.02  | 0.04 | 0.04  | 0.06 |
| 6                 | 0.9  | 0.09 | 0.04 | 0.06 | 0     | 0    | 0.02  | 0.03 | 0.04  | 0.06 |
| 7                 | 0.9  | 0.09 | 0.04 | 0.06 | 0     | 0    | 0.01  | 0.03 | 0.04  | 0.06 |
| 8                 | 0.92 | 0.09 | 0.04 | 0.06 | 0     | 0    | 0.01  | 0.03 | 0.03  | 0.06 |
| 9                 | 0.91 | 0.09 | 0.04 | 0.06 | 0     | 0    | 0.02  | 0.04 | 0.03  | 0.06 |
| 10                | 0.93 | 0.08 | 0.03 | 0.06 | 0     | 0    | 0.02  | 0.04 | 0.02  | 0.05 |
| 11                | 0.91 | 0.1  | 0.05 | 0.08 | 0     | 0    | 0.02  | 0.04 | 0.02  | 0.05 |
| 12                | 0.91 | 0.1  | 0.05 | 0.08 | 0     | 0    | 0.02  | 0.04 | 0.02  | 0.05 |

**age=40 years, timing allo <6 months, cmv=others, graft=PBSC, In vivo Tcell depletion=no,**

| Landmark time (y) | GRFS | se   | GF   | se   | AGVHD | se  | CGVHD | se   | Death | se  |
|-------------------|------|------|------|------|-------|-----|-------|------|-------|-----|
| 0                 | 0.66 | 0.14 | 0.06 | 0.06 | 0.09  | 0.1 | 0.04  | 0.04 | 0.15  | 0.1 |



|    |      |      |      |      |      |      |      |      |      |      |
|----|------|------|------|------|------|------|------|------|------|------|
| 1  | 0.72 | 0.15 | 0.06 | 0.06 | 0.08 | 0.11 | 0.04 | 0.05 | 0.11 | 0.1  |
| 2  | 0.81 | 0.14 | 0.02 | 0.05 | 0.02 | 0.07 | 0.04 | 0.05 | 0.1  | 0.11 |
| 3  | 0.84 | 0.12 | 0.03 | 0.05 | 0    | 0    | 0.05 | 0.05 | 0.09 | 0.11 |
| 4  | 0.85 | 0.12 | 0.03 | 0.05 | 0    | 0    | 0.04 | 0.05 | 0.08 | 0.1  |
| 5  | 0.87 | 0.12 | 0.03 | 0.05 | 0    | 0    | 0.03 | 0.05 | 0.07 | 0.1  |
| 6  | 0.86 | 0.13 | 0.04 | 0.07 | 0    | 0    | 0.03 | 0.05 | 0.07 | 0.1  |
| 7  | 0.87 | 0.13 | 0.04 | 0.07 | 0    | 0    | 0.02 | 0.04 | 0.07 | 0.1  |
| 8  | 0.89 | 0.12 | 0.04 | 0.07 | 0    | 0    | 0.02 | 0.04 | 0.05 | 0.09 |
| 9  | 0.88 | 0.12 | 0.04 | 0.07 | 0    | 0    | 0.02 | 0.05 | 0.05 | 0.09 |
| 10 | 0.91 | 0.11 | 0.03 | 0.07 | 0    | 0    | 0.02 | 0.05 | 0.04 | 0.08 |
| 11 | 0.89 | 0.13 | 0.05 | 0.09 | 0    | 0    | 0.02 | 0.05 | 0.04 | 0.08 |
| 12 | 0.89 | 0.13 | 0.05 | 0.09 | 0    | 0    | 0.02 | 0.05 | 0.04 | 0.08 |

**age=50 years, timing allo <6 months, cmv=others, graft=PBSC, In vivo Tcell depletion=no,**

| Landmark time (y) | GRFS | se   | GF   | se   | AGVHD | se   | CGVHD | se   | Death | se   |
|-------------------|------|------|------|------|-------|------|-------|------|-------|------|
| 0                 | 0.56 | 0.17 | 0.07 | 0.07 | 0.1   | 0.12 | 0.05  | 0.06 | 0.23  | 0.15 |
| 1                 | 0.63 | 0.19 | 0.06 | 0.07 | 0.09  | 0.13 | 0.05  | 0.06 | 0.17  | 0.15 |
| 2                 | 0.73 | 0.19 | 0.03 | 0.06 | 0.02  | 0.09 | 0.06  | 0.07 | 0.15  | 0.17 |
| 3                 | 0.77 | 0.18 | 0.03 | 0.06 | 0     | 0    | 0.06  | 0.08 | 0.14  | 0.17 |
| 4                 | 0.79 | 0.18 | 0.03 | 0.06 | 0     | 0    | 0.06  | 0.08 | 0.12  | 0.16 |
| 5                 | 0.82 | 0.18 | 0.03 | 0.06 | 0     | 0    | 0.05  | 0.08 | 0.1   | 0.16 |
| 6                 | 0.81 | 0.18 | 0.05 | 0.09 | 0     | 0    | 0.04  | 0.07 | 0.11  | 0.16 |
| 7                 | 0.82 | 0.18 | 0.05 | 0.09 | 0     | 0    | 0.03  | 0.07 | 0.11  | 0.16 |
| 8                 | 0.84 | 0.17 | 0.05 | 0.09 | 0     | 0    | 0.02  | 0.06 | 0.08  | 0.15 |
| 9                 | 0.83 | 0.18 | 0.05 | 0.09 | 0     | 0    | 0.03  | 0.07 | 0.08  | 0.15 |
| 10                | 0.87 | 0.17 | 0.04 | 0.08 | 0     | 0    | 0.03  | 0.08 | 0.06  | 0.13 |
| 11                | 0.85 | 0.18 | 0.06 | 0.11 | 0     | 0    | 0.03  | 0.08 | 0.06  | 0.13 |
| 12                | 0.85 | 0.18 | 0.06 | 0.11 | 0     | 0    | 0.03  | 0.08 | 0.06  | 0.13 |

**age=10 years, timing allo >6 months, cmv=D-/R-, graft=BM, In vivo Tcell depletion=yes,**

| Landmark time (y) | GRFS | se   | GF   | se   | AGVHD | se   | CGVHD | se   | Death | se   |
|-------------------|------|------|------|------|-------|------|-------|------|-------|------|
| 0                 | 0.86 | 0.07 | 0.06 | 0.05 | 0.01  | 0.02 | 0.05  | 0.05 | 0.02  | 0.03 |
| 1                 | 0.87 | 0.07 | 0.05 | 0.05 | 0.01  | 0.02 | 0.05  | 0.05 | 0.02  | 0.02 |
| 2                 | 0.91 | 0.07 | 0.02 | 0.04 | 0     | 0.01 | 0.05  | 0.05 | 0.01  | 0.02 |
| 3                 | 0.91 | 0.07 | 0.02 | 0.04 | 0     | 0    | 0.05  | 0.05 | 0.01  | 0.02 |
| 4                 | 0.92 | 0.07 | 0.02 | 0.04 | 0     | 0    | 0.05  | 0.05 | 0.01  | 0.02 |
| 5                 | 0.93 | 0.07 | 0.02 | 0.04 | 0     | 0    | 0.04  | 0.05 | 0.01  | 0.02 |
| 6                 | 0.92 | 0.07 | 0.04 | 0.06 | 0     | 0    | 0.03  | 0.05 | 0.01  | 0.02 |
| 7                 | 0.93 | 0.07 | 0.04 | 0.06 | 0     | 0    | 0.02  | 0.04 | 0.01  | 0.02 |
| 8                 | 0.94 | 0.07 | 0.04 | 0.06 | 0     | 0    | 0.02  | 0.04 | 0.01  | 0.02 |
| 9                 | 0.93 | 0.08 | 0.04 | 0.06 | 0     | 0    | 0.03  | 0.05 | 0.01  | 0.02 |
| 10                | 0.94 | 0.07 | 0.03 | 0.05 | 0     | 0    | 0.03  | 0.05 | 0.01  | 0.02 |
| 11                | 0.92 | 0.08 | 0.04 | 0.07 | 0     | 0    | 0.03  | 0.05 | 0.01  | 0.02 |
| 12                | 0.92 | 0.08 | 0.04 | 0.07 | 0     | 0    | 0.03  | 0.05 | 0.01  | 0.02 |

**age=20 years, timing allo >6 months, cmv=D-/R-, graft=BM, In vivo Tcell depletion=yes,**

| Landmark time (y) | GRFS | se   | GF   | se   | AGVHD | se   | CGVHD | se   | Death | se   |
|-------------------|------|------|------|------|-------|------|-------|------|-------|------|
| 0                 | 0.81 | 0.09 | 0.06 | 0.05 | 0.02  | 0.02 | 0.07  | 0.06 | 0.04  | 0.04 |
| 1                 | 0.83 | 0.09 | 0.06 | 0.05 | 0.01  | 0.02 | 0.07  | 0.06 | 0.03  | 0.04 |
| 2                 | 0.87 | 0.08 | 0.02 | 0.04 | 0     | 0.01 | 0.08  | 0.07 | 0.02  | 0.04 |
| 3                 | 0.88 | 0.08 | 0.02 | 0.04 | 0     | 0    | 0.08  | 0.07 | 0.02  | 0.04 |
| 4                 | 0.89 | 0.08 | 0.02 | 0.04 | 0     | 0    | 0.07  | 0.07 | 0.02  | 0.03 |
| 5                 | 0.9  | 0.08 | 0.02 | 0.04 | 0     | 0    | 0.06  | 0.06 | 0.02  | 0.03 |
| 6                 | 0.9  | 0.09 | 0.04 | 0.06 | 0     | 0    | 0.04  | 0.06 | 0.02  | 0.03 |
| 7                 | 0.91 | 0.09 | 0.04 | 0.06 | 0     | 0    | 0.04  | 0.06 | 0.02  | 0.03 |
| 8                 | 0.92 | 0.08 | 0.04 | 0.06 | 0     | 0    | 0.03  | 0.05 | 0.01  | 0.03 |
| 9                 | 0.91 | 0.09 | 0.04 | 0.06 | 0     | 0    | 0.04  | 0.06 | 0.01  | 0.03 |
| 10                | 0.92 | 0.09 | 0.03 | 0.05 | 0     | 0    | 0.04  | 0.06 | 0.01  | 0.03 |
| 11                | 0.9  | 0.1  | 0.05 | 0.07 | 0     | 0    | 0.04  | 0.06 | 0.01  | 0.03 |
| 12                | 0.9  | 0.1  | 0.05 | 0.07 | 0     | 0    | 0.04  | 0.06 | 0.01  | 0.03 |

**age=30 years, timing allo >6 months, cmv=D-/R-, graft=BM, In vivo Tcell depletion=yes,**

| Landmark time (y) | GRFS | se   | GF   | se   | AGVHD | se   | CGVHD | se   | Death | se   |
|-------------------|------|------|------|------|-------|------|-------|------|-------|------|
| 0                 | 0.76 | 0.11 | 0.07 | 0.06 | 0.02  | 0.02 | 0.1   | 0.08 | 0.06  | 0.06 |
| 1                 | 0.78 | 0.11 | 0.06 | 0.06 | 0.01  | 0.03 | 0.1   | 0.09 | 0.04  | 0.06 |
| 2                 | 0.83 | 0.11 | 0.03 | 0.05 | 0     | 0.02 | 0.11  | 0.09 | 0.04  | 0.06 |
| 3                 | 0.83 | 0.11 | 0.03 | 0.05 | 0     | 0    | 0.11  | 0.09 | 0.03  | 0.06 |
| 4                 | 0.85 | 0.11 | 0.03 | 0.05 | 0     | 0    | 0.1   | 0.09 | 0.03  | 0.05 |
| 5                 | 0.87 | 0.11 | 0.03 | 0.05 | 0     | 0    | 0.08  | 0.09 | 0.02  | 0.05 |
| 6                 | 0.87 | 0.11 | 0.04 | 0.07 | 0     | 0    | 0.06  | 0.09 | 0.02  | 0.05 |
| 7                 | 0.88 | 0.11 | 0.05 | 0.07 | 0     | 0    | 0.05  | 0.08 | 0.02  | 0.05 |
| 8                 | 0.89 | 0.11 | 0.05 | 0.07 | 0     | 0    | 0.04  | 0.07 | 0.02  | 0.05 |
| 9                 | 0.88 | 0.12 | 0.05 | 0.07 | 0     | 0    | 0.06  | 0.09 | 0.02  | 0.05 |
| 10                | 0.9  | 0.12 | 0.03 | 0.06 | 0     | 0    | 0.06  | 0.09 | 0.01  | 0.04 |
| 11                | 0.88 | 0.13 | 0.05 | 0.08 | 0     | 0    | 0.06  | 0.09 | 0.01  | 0.04 |
| 12                | 0.88 | 0.13 | 0.05 | 0.08 | 0     | 0    | 0.06  | 0.09 | 0.01  | 0.04 |

**age=40 years, timing allo >6 months, cmv=D-/R-, graft=BM, In vivo Tcell depletion=yes,**

| Landmark time (y) | GRFS | se   | GF   | se   | AGVHD | se   | CGVHD | se   | Death | se   |
|-------------------|------|------|------|------|-------|------|-------|------|-------|------|
| 0                 | 0.68 | 0.15 | 0.08 | 0.07 | 0.02  | 0.03 | 0.13  | 0.12 | 0.09  | 0.09 |
| 1                 | 0.71 | 0.16 | 0.07 | 0.07 | 0.02  | 0.03 | 0.14  | 0.12 | 0.07  | 0.09 |
| 2                 | 0.76 | 0.16 | 0.03 | 0.05 | 0     | 0.02 | 0.15  | 0.13 | 0.06  | 0.09 |
| 3                 | 0.77 | 0.16 | 0.03 | 0.05 | 0     | 0    | 0.15  | 0.13 | 0.05  | 0.09 |
| 4                 | 0.79 | 0.16 | 0.03 | 0.06 | 0     | 0    | 0.14  | 0.14 | 0.04  | 0.09 |
| 5                 | 0.82 | 0.16 | 0.03 | 0.06 | 0     | 0    | 0.11  | 0.14 | 0.04  | 0.08 |
| 6                 | 0.83 | 0.16 | 0.05 | 0.08 | 0     | 0    | 0.09  | 0.13 | 0.04  | 0.09 |
| 7                 | 0.84 | 0.16 | 0.05 | 0.08 | 0     | 0    | 0.07  | 0.12 | 0.04  | 0.09 |
| 8                 | 0.86 | 0.15 | 0.05 | 0.08 | 0     | 0    | 0.06  | 0.11 | 0.03  | 0.08 |

|    |      |      |      |      |   |   |      |      |      |      |
|----|------|------|------|------|---|---|------|------|------|------|
| 9  | 0.84 | 0.17 | 0.05 | 0.08 | 0 | 0 | 0.08 | 0.14 | 0.03 | 0.08 |
| 10 | 0.86 | 0.17 | 0.04 | 0.07 | 0 | 0 | 0.08 | 0.14 | 0.02 | 0.07 |
| 11 | 0.84 | 0.18 | 0.06 | 0.1  | 0 | 0 | 0.08 | 0.14 | 0.02 | 0.07 |
| 12 | 0.84 | 0.18 | 0.06 | 0.1  | 0 | 0 | 0.08 | 0.14 | 0.02 | 0.07 |

**age=50 years, timing allo >6 months, cmv=D-/R-, graft=BM, In vivo Tcell depletion=yes,**

| Landmark time (y) | GRFS | se   | GF   | se   | AGVHD | se   | CGVHD | se   | Death | se   |
|-------------------|------|------|------|------|-------|------|-------|------|-------|------|
| 0                 | 0.58 | 0.21 | 0.08 | 0.08 | 0.02  | 0.04 | 0.18  | 0.17 | 0.14  | 0.14 |
| 1                 | 0.62 | 0.22 | 0.07 | 0.08 | 0.02  | 0.04 | 0.19  | 0.18 | 0.1   | 0.14 |
| 2                 | 0.67 | 0.23 | 0.03 | 0.06 | 0.01  | 0.03 | 0.21  | 0.2  | 0.09  | 0.15 |
| 3                 | 0.68 | 0.23 | 0.03 | 0.06 | 0     | 0    | 0.21  | 0.2  | 0.08  | 0.14 |
| 4                 | 0.71 | 0.24 | 0.03 | 0.07 | 0     | 0    | 0.19  | 0.21 | 0.07  | 0.14 |
| 5                 | 0.75 | 0.24 | 0.03 | 0.07 | 0     | 0    | 0.16  | 0.21 | 0.06  | 0.13 |
| 6                 | 0.76 | 0.24 | 0.05 | 0.1  | 0     | 0    | 0.12  | 0.2  | 0.06  | 0.14 |
| 7                 | 0.78 | 0.24 | 0.05 | 0.1  | 0     | 0    | 0.1   | 0.19 | 0.06  | 0.14 |
| 8                 | 0.81 | 0.23 | 0.06 | 0.1  | 0     | 0    | 0.08  | 0.18 | 0.05  | 0.13 |
| 9                 | 0.78 | 0.25 | 0.06 | 0.1  | 0     | 0    | 0.11  | 0.21 | 0.05  | 0.13 |
| 10                | 0.81 | 0.25 | 0.04 | 0.09 | 0     | 0    | 0.11  | 0.22 | 0.04  | 0.12 |
| 11                | 0.79 | 0.26 | 0.06 | 0.12 | 0     | 0    | 0.11  | 0.22 | 0.04  | 0.12 |
| 12                | 0.79 | 0.26 | 0.06 | 0.12 | 0     | 0    | 0.11  | 0.22 | 0.04  | 0.12 |

**age=10 years, timing allo <6 months, cmv=D-/R-, graft=BM, In vivo Tcell depletion=yes,**

| Landmark time (y) | GRFS | se   | GF   | se   | AGVHD | se   | CGVHD | se   | Death | se   |
|-------------------|------|------|------|------|-------|------|-------|------|-------|------|
| 0                 | 0.94 | 0.03 | 0.02 | 0.01 | 0.01  | 0.01 | 0.03  | 0.02 | 0.01  | 0.01 |
| 1                 | 0.95 | 0.03 | 0.01 | 0.01 | 0.01  | 0.01 | 0.03  | 0.02 | 0     | 0.01 |
| 2                 | 0.96 | 0.03 | 0.01 | 0.01 | 0     | 0    | 0.03  | 0.02 | 0     | 0.01 |
| 3                 | 0.96 | 0.02 | 0.01 | 0.01 | 0     | 0    | 0.03  | 0.02 | 0     | 0.01 |
| 4                 | 0.97 | 0.02 | 0.01 | 0.01 | 0     | 0    | 0.03  | 0.02 | 0     | 0.01 |
| 5                 | 0.97 | 0.02 | 0.01 | 0.01 | 0     | 0    | 0.02  | 0.02 | 0     | 0.01 |
| 6                 | 0.97 | 0.02 | 0.01 | 0.01 | 0     | 0    | 0.02  | 0.02 | 0     | 0.01 |
| 7                 | 0.98 | 0.02 | 0.01 | 0.01 | 0     | 0    | 0.01  | 0.02 | 0     | 0.01 |
| 8                 | 0.98 | 0.02 | 0.01 | 0.01 | 0     | 0    | 0.01  | 0.02 | 0     | 0    |
| 9                 | 0.97 | 0.03 | 0.01 | 0.01 | 0     | 0    | 0.01  | 0.02 | 0     | 0    |
| 10                | 0.98 | 0.02 | 0.01 | 0.01 | 0     | 0    | 0.01  | 0.02 | 0     | 0    |
| 11                | 0.97 | 0.03 | 0.01 | 0.02 | 0     | 0    | 0.01  | 0.02 | 0     | 0    |
| 12                | 0.97 | 0.03 | 0.01 | 0.02 | 0     | 0    | 0.01  | 0.02 | 0     | 0    |

**age=20 years, timing allo <6 months, cmv=D-/R-, graft=BM, In vivo Tcell depletion=yes,**

| Landmark time (y) | GRFS | se   | GF   | se   | AGVHD | se   | CGVHD | se   | Death | se   |
|-------------------|------|------|------|------|-------|------|-------|------|-------|------|
| 0                 | 0.93 | 0.03 | 0.02 | 0.01 | 0.01  | 0.01 | 0.04  | 0.03 | 0.01  | 0.01 |
| 1                 | 0.93 | 0.03 | 0.02 | 0.01 | 0.01  | 0.01 | 0.04  | 0.03 | 0.01  | 0.01 |
| 2                 | 0.95 | 0.03 | 0.01 | 0.01 | 0     | 0.01 | 0.04  | 0.03 | 0.01  | 0.01 |
| 3                 | 0.95 | 0.03 | 0.01 | 0.01 | 0     | 0    | 0.04  | 0.03 | 0.01  | 0.01 |
| 4                 | 0.95 | 0.03 | 0.01 | 0.01 | 0     | 0    | 0.04  | 0.03 | 0     | 0.01 |

|    |      |      |      |      |   |   |      |      |   |      |
|----|------|------|------|------|---|---|------|------|---|------|
| 5  | 0.96 | 0.03 | 0.01 | 0.01 | 0 | 0 | 0.03 | 0.03 | 0 | 0.01 |
| 6  | 0.96 | 0.03 | 0.01 | 0.02 | 0 | 0 | 0.02 | 0.03 | 0 | 0.01 |
| 7  | 0.97 | 0.03 | 0.01 | 0.02 | 0 | 0 | 0.02 | 0.02 | 0 | 0.01 |
| 8  | 0.97 | 0.03 | 0.01 | 0.02 | 0 | 0 | 0.01 | 0.02 | 0 | 0.01 |
| 9  | 0.97 | 0.03 | 0.01 | 0.02 | 0 | 0 | 0.02 | 0.03 | 0 | 0.01 |
| 10 | 0.97 | 0.03 | 0.01 | 0.01 | 0 | 0 | 0.02 | 0.03 | 0 | 0.01 |
| 11 | 0.96 | 0.03 | 0.01 | 0.02 | 0 | 0 | 0.02 | 0.03 | 0 | 0.01 |
| 12 | 0.96 | 0.03 | 0.01 | 0.02 | 0 | 0 | 0.02 | 0.03 | 0 | 0.01 |

**age=30 years, timing allo <6 months, cmv=D-/R-, graft=BM, In vivo Tcell depletion=yes,**

| Landmark time (y) | GRFS | se   | GF   | se   | AGVHD | se   | CGVHD | se   | Death | se   |
|-------------------|------|------|------|------|-------|------|-------|------|-------|------|
| 0                 | 0.9  | 0.05 | 0.02 | 0.02 | 0.01  | 0.01 | 0.06  | 0.04 | 0.02  | 0.02 |
| 1                 | 0.91 | 0.05 | 0.02 | 0.02 | 0.01  | 0.01 | 0.06  | 0.04 | 0.01  | 0.02 |
| 2                 | 0.92 | 0.05 | 0.01 | 0.01 | 0     | 0.01 | 0.06  | 0.04 | 0.01  | 0.01 |
| 3                 | 0.93 | 0.05 | 0.01 | 0.01 | 0     | 0    | 0.06  | 0.04 | 0.01  | 0.01 |
| 4                 | 0.93 | 0.05 | 0.01 | 0.01 | 0     | 0    | 0.05  | 0.04 | 0.01  | 0.01 |
| 5                 | 0.94 | 0.04 | 0.01 | 0.01 | 0     | 0    | 0.04  | 0.04 | 0.01  | 0.01 |
| 6                 | 0.95 | 0.04 | 0.01 | 0.02 | 0     | 0    | 0.03  | 0.04 | 0.01  | 0.01 |
| 7                 | 0.96 | 0.04 | 0.01 | 0.02 | 0     | 0    | 0.03  | 0.04 | 0.01  | 0.01 |
| 8                 | 0.96 | 0.04 | 0.01 | 0.02 | 0     | 0    | 0.02  | 0.03 | 0     | 0.01 |
| 9                 | 0.95 | 0.05 | 0.01 | 0.02 | 0     | 0    | 0.03  | 0.04 | 0     | 0.01 |
| 10                | 0.96 | 0.05 | 0.01 | 0.02 | 0     | 0    | 0.03  | 0.04 | 0     | 0.01 |
| 11                | 0.95 | 0.05 | 0.01 | 0.02 | 0     | 0    | 0.03  | 0.04 | 0     | 0.01 |
| 12                | 0.95 | 0.05 | 0.01 | 0.02 | 0     | 0    | 0.03  | 0.04 | 0     | 0.01 |

**age=40 years, timing allo <6 months, cmv=D-/R-, graft=BM, In vivo Tcell depletion=yes,**

| Landmark time (y) | GRFS | se   | GF   | se   | AGVHD | se   | CGVHD | se   | Death | se   |
|-------------------|------|------|------|------|-------|------|-------|------|-------|------|
| 0                 | 0.86 | 0.07 | 0.02 | 0.02 | 0.01  | 0.01 | 0.08  | 0.07 | 0.02  | 0.03 |
| 1                 | 0.88 | 0.07 | 0.02 | 0.02 | 0.01  | 0.01 | 0.08  | 0.07 | 0.02  | 0.03 |
| 2                 | 0.89 | 0.07 | 0.01 | 0.02 | 0     | 0.01 | 0.08  | 0.07 | 0.01  | 0.02 |
| 3                 | 0.9  | 0.07 | 0.01 | 0.02 | 0     | 0    | 0.08  | 0.07 | 0.01  | 0.02 |
| 4                 | 0.91 | 0.07 | 0.01 | 0.02 | 0     | 0    | 0.07  | 0.07 | 0.01  | 0.02 |
| 5                 | 0.92 | 0.07 | 0.01 | 0.02 | 0     | 0    | 0.06  | 0.07 | 0.01  | 0.02 |
| 6                 | 0.93 | 0.07 | 0.01 | 0.02 | 0     | 0    | 0.05  | 0.06 | 0.01  | 0.02 |
| 7                 | 0.94 | 0.07 | 0.01 | 0.02 | 0     | 0    | 0.04  | 0.06 | 0.01  | 0.02 |
| 8                 | 0.95 | 0.06 | 0.01 | 0.02 | 0     | 0    | 0.03  | 0.05 | 0.01  | 0.02 |
| 9                 | 0.94 | 0.07 | 0.01 | 0.02 | 0     | 0    | 0.04  | 0.07 | 0.01  | 0.02 |
| 10                | 0.94 | 0.07 | 0.01 | 0.02 | 0     | 0    | 0.04  | 0.07 | 0.01  | 0.02 |
| 11                | 0.94 | 0.07 | 0.02 | 0.03 | 0     | 0    | 0.04  | 0.07 | 0.01  | 0.02 |
| 12                | 0.94 | 0.07 | 0.02 | 0.03 | 0     | 0    | 0.04  | 0.07 | 0.01  | 0.02 |

**age=50 years, timing allo <6 months, cmv=D-/R-, graft=BM, In vivo Tcell depletion=yes,**

| Landmark time (y) | GRFS | se   | GF   | se   | AGVHD | se   | CGVHD | se   | Death | se   |
|-------------------|------|------|------|------|-------|------|-------|------|-------|------|
| 0                 | 0.82 | 0.12 | 0.02 | 0.03 | 0.01  | 0.02 | 0.11  | 0.11 | 0.04  | 0.04 |

|    |      |      |      |      |      |      |      |      |      |      |
|----|------|------|------|------|------|------|------|------|------|------|
| 1  | 0.83 | 0.12 | 0.02 | 0.03 | 0.01 | 0.02 | 0.11 | 0.11 | 0.03 | 0.04 |
| 2  | 0.85 | 0.12 | 0.01 | 0.02 | 0    | 0.01 | 0.11 | 0.11 | 0.02 | 0.04 |
| 3  | 0.85 | 0.12 | 0.01 | 0.02 | 0    | 0    | 0.12 | 0.11 | 0.02 | 0.04 |
| 4  | 0.87 | 0.12 | 0.01 | 0.02 | 0    | 0    | 0.11 | 0.11 | 0.02 | 0.04 |
| 5  | 0.89 | 0.12 | 0.01 | 0.02 | 0    | 0    | 0.09 | 0.11 | 0.02 | 0.04 |
| 6  | 0.9  | 0.11 | 0.02 | 0.03 | 0    | 0    | 0.07 | 0.1  | 0.02 | 0.04 |
| 7  | 0.91 | 0.11 | 0.02 | 0.03 | 0    | 0    | 0.05 | 0.1  | 0.02 | 0.04 |
| 8  | 0.93 | 0.1  | 0.02 | 0.03 | 0    | 0    | 0.04 | 0.09 | 0.01 | 0.03 |
| 9  | 0.91 | 0.12 | 0.02 | 0.03 | 0    | 0    | 0.06 | 0.11 | 0.01 | 0.03 |
| 10 | 0.92 | 0.12 | 0.01 | 0.03 | 0    | 0    | 0.06 | 0.11 | 0.01 | 0.03 |
| 11 | 0.91 | 0.12 | 0.02 | 0.04 | 0    | 0    | 0.06 | 0.11 | 0.01 | 0.03 |
| 12 | 0.91 | 0.12 | 0.02 | 0.04 | 0    | 0    | 0.06 | 0.11 | 0.01 | 0.03 |

**age=10 years, timing allo >6 months, cmv=others, graft=BM, In vivo Tcell depletion=yes,**

| Landmark time (y) | GRFS | se   | GF   | se   | AGVHD | se   | CGVHD | se   | Death | se   |
|-------------------|------|------|------|------|-------|------|-------|------|-------|------|
| 0                 | 0.76 | 0.08 | 0.06 | 0.05 | 0.02  | 0.02 | 0.07  | 0.05 | 0.09  | 0.05 |
| 1                 | 0.79 | 0.08 | 0.06 | 0.05 | 0.02  | 0.02 | 0.07  | 0.06 | 0.06  | 0.05 |
| 2                 | 0.84 | 0.08 | 0.02 | 0.04 | 0     | 0.01 | 0.08  | 0.06 | 0.05  | 0.05 |
| 3                 | 0.85 | 0.08 | 0.02 | 0.04 | 0     | 0    | 0.08  | 0.06 | 0.05  | 0.05 |
| 4                 | 0.86 | 0.08 | 0.02 | 0.04 | 0     | 0    | 0.07  | 0.06 | 0.04  | 0.04 |
| 5                 | 0.88 | 0.08 | 0.02 | 0.04 | 0     | 0    | 0.06  | 0.06 | 0.03  | 0.04 |
| 6                 | 0.88 | 0.08 | 0.04 | 0.05 | 0     | 0    | 0.04  | 0.06 | 0.04  | 0.04 |
| 7                 | 0.89 | 0.08 | 0.04 | 0.05 | 0     | 0    | 0.04  | 0.05 | 0.04  | 0.04 |
| 8                 | 0.9  | 0.08 | 0.04 | 0.05 | 0     | 0    | 0.03  | 0.05 | 0.03  | 0.04 |
| 9                 | 0.89 | 0.09 | 0.04 | 0.05 | 0     | 0    | 0.04  | 0.06 | 0.03  | 0.04 |
| 10                | 0.91 | 0.08 | 0.03 | 0.05 | 0     | 0    | 0.04  | 0.06 | 0.02  | 0.03 |
| 11                | 0.89 | 0.09 | 0.05 | 0.06 | 0     | 0    | 0.04  | 0.06 | 0.02  | 0.03 |
| 12                | 0.89 | 0.09 | 0.05 | 0.06 | 0     | 0    | 0.04  | 0.06 | 0.02  | 0.03 |

**age=20 years, timing allo >6 months, cmv=others, graft=BM, In vivo Tcell depletion=yes,**

| Landmark time (y) | GRFS | se   | GF   | se   | AGVHD | se   | CGVHD | se   | Death | se   |
|-------------------|------|------|------|------|-------|------|-------|------|-------|------|
| 0                 | 0.68 | 0.09 | 0.07 | 0.04 | 0.02  | 0.02 | 0.09  | 0.06 | 0.13  | 0.06 |
| 1                 | 0.72 | 0.09 | 0.06 | 0.04 | 0.02  | 0.02 | 0.1   | 0.06 | 0.1   | 0.06 |
| 2                 | 0.78 | 0.09 | 0.03 | 0.03 | 0.01  | 0.01 | 0.11  | 0.07 | 0.08  | 0.06 |
| 3                 | 0.79 | 0.09 | 0.03 | 0.03 | 0     | 0    | 0.11  | 0.07 | 0.07  | 0.06 |
| 4                 | 0.81 | 0.09 | 0.03 | 0.04 | 0     | 0    | 0.1   | 0.07 | 0.06  | 0.06 |
| 5                 | 0.84 | 0.09 | 0.03 | 0.04 | 0     | 0    | 0.08  | 0.07 | 0.05  | 0.05 |
| 6                 | 0.84 | 0.09 | 0.04 | 0.05 | 0     | 0    | 0.06  | 0.06 | 0.06  | 0.05 |
| 7                 | 0.85 | 0.09 | 0.04 | 0.05 | 0     | 0    | 0.05  | 0.06 | 0.06  | 0.06 |
| 8                 | 0.87 | 0.09 | 0.05 | 0.05 | 0     | 0    | 0.04  | 0.06 | 0.04  | 0.05 |
| 9                 | 0.85 | 0.09 | 0.05 | 0.05 | 0     | 0    | 0.06  | 0.07 | 0.04  | 0.05 |
| 10                | 0.88 | 0.09 | 0.03 | 0.05 | 0     | 0    | 0.06  | 0.07 | 0.03  | 0.05 |
| 11                | 0.86 | 0.1  | 0.05 | 0.06 | 0     | 0    | 0.06  | 0.07 | 0.03  | 0.05 |
| 12                | 0.86 | 0.1  | 0.05 | 0.06 | 0     | 0    | 0.06  | 0.07 | 0.03  | 0.05 |

**age=30 years, timing allo >6 months, cmv=others, graft=BM, In vivo Tcell depletion=yes,**

| Landmark time (y) | GRFS | se   | GF   | se   | AGVHD | se   | CGVHD | se   | Death | se   |
|-------------------|------|------|------|------|-------|------|-------|------|-------|------|
| 0                 | 0.58 | 0.1  | 0.07 | 0.04 | 0.03  | 0.02 | 0.12  | 0.07 | 0.2   | 0.08 |
| 1                 | 0.63 | 0.11 | 0.07 | 0.05 | 0.02  | 0.03 | 0.14  | 0.08 | 0.15  | 0.08 |
| 2                 | 0.69 | 0.11 | 0.03 | 0.03 | 0.01  | 0.02 | 0.15  | 0.08 | 0.13  | 0.08 |
| 3                 | 0.71 | 0.11 | 0.03 | 0.04 | 0     | 0    | 0.15  | 0.08 | 0.11  | 0.08 |
| 4                 | 0.73 | 0.11 | 0.03 | 0.04 | 0     | 0    | 0.14  | 0.09 | 0.1   | 0.08 |
| 5                 | 0.77 | 0.11 | 0.03 | 0.04 | 0     | 0    | 0.12  | 0.09 | 0.09  | 0.07 |
| 6                 | 0.78 | 0.11 | 0.05 | 0.05 | 0     | 0    | 0.09  | 0.08 | 0.09  | 0.08 |
| 7                 | 0.79 | 0.11 | 0.05 | 0.05 | 0     | 0    | 0.07  | 0.08 | 0.09  | 0.08 |
| 8                 | 0.82 | 0.11 | 0.05 | 0.05 | 0     | 0    | 0.06  | 0.07 | 0.07  | 0.07 |
| 9                 | 0.8  | 0.12 | 0.05 | 0.05 | 0     | 0    | 0.08  | 0.09 | 0.07  | 0.07 |
| 10                | 0.83 | 0.11 | 0.04 | 0.05 | 0     | 0    | 0.08  | 0.09 | 0.05  | 0.07 |
| 11                | 0.81 | 0.12 | 0.06 | 0.06 | 0     | 0    | 0.08  | 0.09 | 0.05  | 0.07 |
| 12                | 0.81 | 0.12 | 0.06 | 0.06 | 0     | 0    | 0.08  | 0.09 | 0.05  | 0.07 |

**age=40 years, timing allo >6 months, cmv=others, graft=BM, In vivo Tcell depletion=yes,**

| Landmark time (y) | GRFS | se   | GF   | se   | AGVHD | se   | CGVHD | se   | Death | se   |
|-------------------|------|------|------|------|-------|------|-------|------|-------|------|
| 0                 | 0.45 | 0.12 | 0.07 | 0.05 | 0.03  | 0.03 | 0.15  | 0.09 | 0.3   | 0.11 |
| 1                 | 0.51 | 0.14 | 0.07 | 0.05 | 0.02  | 0.03 | 0.18  | 0.1  | 0.22  | 0.12 |
| 2                 | 0.58 | 0.15 | 0.03 | 0.04 | 0.01  | 0.02 | 0.2   | 0.11 | 0.19  | 0.12 |
| 3                 | 0.6  | 0.15 | 0.03 | 0.04 | 0     | 0    | 0.2   | 0.12 | 0.17  | 0.12 |
| 4                 | 0.63 | 0.15 | 0.03 | 0.04 | 0     | 0    | 0.19  | 0.12 | 0.15  | 0.12 |
| 5                 | 0.68 | 0.16 | 0.03 | 0.05 | 0     | 0    | 0.16  | 0.12 | 0.13  | 0.12 |
| 6                 | 0.69 | 0.16 | 0.05 | 0.06 | 0     | 0    | 0.12  | 0.12 | 0.14  | 0.12 |
| 7                 | 0.71 | 0.16 | 0.05 | 0.06 | 0     | 0    | 0.1   | 0.11 | 0.14  | 0.12 |
| 8                 | 0.76 | 0.16 | 0.05 | 0.07 | 0     | 0    | 0.08  | 0.11 | 0.11  | 0.12 |
| 9                 | 0.73 | 0.17 | 0.05 | 0.07 | 0     | 0    | 0.11  | 0.12 | 0.11  | 0.12 |
| 10                | 0.77 | 0.17 | 0.04 | 0.06 | 0     | 0    | 0.11  | 0.13 | 0.08  | 0.11 |
| 11                | 0.74 | 0.17 | 0.06 | 0.08 | 0     | 0    | 0.11  | 0.13 | 0.08  | 0.11 |
| 12                | 0.74 | 0.17 | 0.06 | 0.08 | 0     | 0    | 0.11  | 0.13 | 0.08  | 0.11 |

**age=50 years, timing allo >6 months, cmv=others, graft=BM, In vivo Tcell depletion=yes,**

| Landmark time (y) | GRFS | se   | GF   | se   | AGVHD | se   | CGVHD | se   | Death | se   |
|-------------------|------|------|------|------|-------|------|-------|------|-------|------|
| 0                 | 0.3  | 0.15 | 0.07 | 0.06 | 0.03  | 0.03 | 0.18  | 0.12 | 0.42  | 0.16 |
| 1                 | 0.37 | 0.18 | 0.07 | 0.07 | 0.03  | 0.04 | 0.22  | 0.14 | 0.31  | 0.18 |
| 2                 | 0.44 | 0.2  | 0.02 | 0.04 | 0.01  | 0.03 | 0.25  | 0.17 | 0.28  | 0.19 |
| 3                 | 0.46 | 0.21 | 0.03 | 0.04 | 0     | 0    | 0.27  | 0.17 | 0.25  | 0.19 |
| 4                 | 0.5  | 0.22 | 0.03 | 0.05 | 0     | 0    | 0.26  | 0.18 | 0.22  | 0.19 |
| 5                 | 0.56 | 0.24 | 0.03 | 0.05 | 0     | 0    | 0.22  | 0.19 | 0.19  | 0.19 |
| 6                 | 0.58 | 0.24 | 0.05 | 0.07 | 0     | 0    | 0.16  | 0.19 | 0.21  | 0.21 |
| 7                 | 0.6  | 0.24 | 0.05 | 0.08 | 0     | 0    | 0.13  | 0.18 | 0.21  | 0.21 |
| 8                 | 0.66 | 0.25 | 0.06 | 0.08 | 0     | 0    | 0.1   | 0.17 | 0.17  | 0.21 |

|    |      |      |      |      |   |   |      |      |      |      |
|----|------|------|------|------|---|---|------|------|------|------|
| 9  | 0.63 | 0.26 | 0.06 | 0.08 | 0 | 0 | 0.14 | 0.19 | 0.17 | 0.21 |
| 10 | 0.68 | 0.26 | 0.04 | 0.08 | 0 | 0 | 0.15 | 0.21 | 0.13 | 0.19 |
| 11 | 0.65 | 0.26 | 0.06 | 0.1  | 0 | 0 | 0.15 | 0.21 | 0.13 | 0.19 |
| 12 | 0.65 | 0.26 | 0.06 | 0.1  | 0 | 0 | 0.15 | 0.21 | 0.13 | 0.19 |

**age=10 years, timing allo <6 months, cmv=others, graft=BM, In vivo Tcell depletion=yes,**

| Landmark time (y) | GRFS | se   | GF   | se   | AGVHD | se   | CGVHD | se   | Death | se   |
|-------------------|------|------|------|------|-------|------|-------|------|-------|------|
| 0                 | 0.91 | 0.03 | 0.02 | 0.01 | 0.01  | 0.01 | 0.04  | 0.03 | 0.02  | 0.01 |
| 1                 | 0.92 | 0.03 | 0.02 | 0.01 | 0.01  | 0.01 | 0.04  | 0.03 | 0.02  | 0.01 |
| 2                 | 0.94 | 0.03 | 0.01 | 0.01 | 0     | 0.01 | 0.04  | 0.03 | 0.01  | 0.01 |
| 3                 | 0.94 | 0.03 | 0.01 | 0.01 | 0     | 0    | 0.04  | 0.03 | 0.01  | 0.01 |
| 4                 | 0.95 | 0.03 | 0.01 | 0.01 | 0     | 0    | 0.04  | 0.03 | 0.01  | 0.01 |
| 5                 | 0.95 | 0.03 | 0.01 | 0.01 | 0     | 0    | 0.03  | 0.03 | 0.01  | 0.01 |
| 6                 | 0.96 | 0.03 | 0.01 | 0.01 | 0     | 0    | 0.02  | 0.02 | 0.01  | 0.01 |
| 7                 | 0.96 | 0.03 | 0.01 | 0.01 | 0     | 0    | 0.02  | 0.02 | 0.01  | 0.01 |
| 8                 | 0.97 | 0.03 | 0.01 | 0.01 | 0     | 0    | 0.01  | 0.02 | 0.01  | 0.01 |
| 9                 | 0.96 | 0.03 | 0.01 | 0.01 | 0     | 0    | 0.02  | 0.02 | 0.01  | 0.01 |
| 10                | 0.97 | 0.03 | 0.01 | 0.01 | 0     | 0    | 0.02  | 0.02 | 0     | 0.01 |
| 11                | 0.96 | 0.03 | 0.01 | 0.02 | 0     | 0    | 0.02  | 0.02 | 0     | 0.01 |
| 12                | 0.96 | 0.03 | 0.01 | 0.02 | 0     | 0    | 0.02  | 0.02 | 0     | 0.01 |

**age=20 years, timing allo <6 months, cmv=others, graft=BM, In vivo Tcell depletion=yes,**

| Landmark time (y) | GRFS | se   | GF   | se   | AGVHD | se   | CGVHD | se   | Death | se   |
|-------------------|------|------|------|------|-------|------|-------|------|-------|------|
| 0                 | 0.88 | 0.04 | 0.02 | 0.01 | 0.01  | 0.01 | 0.06  | 0.03 | 0.04  | 0.02 |
| 1                 | 0.89 | 0.04 | 0.02 | 0.01 | 0.01  | 0.01 | 0.06  | 0.03 | 0.03  | 0.02 |
| 2                 | 0.91 | 0.04 | 0.01 | 0.01 | 0     | 0.01 | 0.06  | 0.03 | 0.02  | 0.02 |
| 3                 | 0.91 | 0.03 | 0.01 | 0.01 | 0     | 0    | 0.06  | 0.03 | 0.02  | 0.02 |
| 4                 | 0.92 | 0.03 | 0.01 | 0.01 | 0     | 0    | 0.05  | 0.03 | 0.02  | 0.02 |
| 5                 | 0.93 | 0.03 | 0.01 | 0.01 | 0     | 0    | 0.04  | 0.03 | 0.01  | 0.01 |
| 6                 | 0.94 | 0.03 | 0.01 | 0.01 | 0     | 0    | 0.03  | 0.03 | 0.01  | 0.01 |
| 7                 | 0.95 | 0.03 | 0.01 | 0.01 | 0     | 0    | 0.03  | 0.02 | 0.01  | 0.01 |
| 8                 | 0.95 | 0.03 | 0.01 | 0.01 | 0     | 0    | 0.02  | 0.02 | 0.01  | 0.01 |
| 9                 | 0.95 | 0.03 | 0.01 | 0.01 | 0     | 0    | 0.03  | 0.03 | 0.01  | 0.01 |
| 10                | 0.95 | 0.03 | 0.01 | 0.01 | 0     | 0    | 0.03  | 0.03 | 0.01  | 0.01 |
| 11                | 0.95 | 0.03 | 0.01 | 0.02 | 0     | 0    | 0.03  | 0.03 | 0.01  | 0.01 |
| 12                | 0.95 | 0.03 | 0.01 | 0.02 | 0     | 0    | 0.03  | 0.03 | 0.01  | 0.01 |

**age=30 years, timing allo <6 months, cmv=others, graft=BM, In vivo Tcell depletion=yes,**

| Landmark time (y) | GRFS | se   | GF   | se   | AGVHD | se   | CGVHD | se   | Death | se   |
|-------------------|------|------|------|------|-------|------|-------|------|-------|------|
| 0                 | 0.83 | 0.05 | 0.02 | 0.01 | 0.01  | 0.01 | 0.08  | 0.04 | 0.06  | 0.03 |
| 1                 | 0.85 | 0.05 | 0.02 | 0.01 | 0.01  | 0.01 | 0.08  | 0.04 | 0.04  | 0.03 |
| 2                 | 0.87 | 0.05 | 0.01 | 0.01 | 0     | 0.01 | 0.08  | 0.04 | 0.03  | 0.02 |
| 3                 | 0.88 | 0.05 | 0.01 | 0.01 | 0     | 0    | 0.08  | 0.04 | 0.03  | 0.02 |
| 4                 | 0.89 | 0.04 | 0.01 | 0.01 | 0     | 0    | 0.08  | 0.04 | 0.03  | 0.02 |

|    |      |      |      |      |   |   |      |      |      |      |
|----|------|------|------|------|---|---|------|------|------|------|
| 5  | 0.91 | 0.04 | 0.01 | 0.01 | 0 | 0 | 0.06 | 0.04 | 0.02 | 0.02 |
| 6  | 0.92 | 0.04 | 0.01 | 0.01 | 0 | 0 | 0.05 | 0.03 | 0.02 | 0.02 |
| 7  | 0.92 | 0.04 | 0.01 | 0.01 | 0 | 0 | 0.04 | 0.03 | 0.02 | 0.02 |
| 8  | 0.94 | 0.04 | 0.01 | 0.02 | 0 | 0 | 0.03 | 0.03 | 0.02 | 0.02 |
| 9  | 0.92 | 0.04 | 0.01 | 0.02 | 0 | 0 | 0.04 | 0.04 | 0.02 | 0.02 |
| 10 | 0.93 | 0.04 | 0.01 | 0.01 | 0 | 0 | 0.04 | 0.04 | 0.01 | 0.02 |
| 11 | 0.93 | 0.04 | 0.02 | 0.02 | 0 | 0 | 0.04 | 0.04 | 0.01 | 0.02 |
| 12 | 0.93 | 0.04 | 0.02 | 0.02 | 0 | 0 | 0.04 | 0.04 | 0.01 | 0.02 |

**age=40 years, timing allo <6 months, cmv=others, graft=BM, In vivo Tcell depletion=yes,**

| Landmark time (y) | GRFS | se   | GF   | se   | AGVHD | se   | CGVHD | se   | Death | se   |
|-------------------|------|------|------|------|-------|------|-------|------|-------|------|
| 0                 | 0.76 | 0.07 | 0.02 | 0.02 | 0.01  | 0.02 | 0.11  | 0.06 | 0.09  | 0.04 |
| 1                 | 0.79 | 0.07 | 0.02 | 0.02 | 0.01  | 0.02 | 0.11  | 0.06 | 0.06  | 0.04 |
| 2                 | 0.82 | 0.07 | 0.01 | 0.01 | 0     | 0.01 | 0.12  | 0.06 | 0.05  | 0.04 |
| 3                 | 0.83 | 0.07 | 0.01 | 0.01 | 0     | 0    | 0.12  | 0.06 | 0.05  | 0.04 |
| 4                 | 0.84 | 0.07 | 0.01 | 0.01 | 0     | 0    | 0.11  | 0.06 | 0.04  | 0.04 |
| 5                 | 0.87 | 0.07 | 0.01 | 0.01 | 0     | 0    | 0.09  | 0.06 | 0.04  | 0.04 |
| 6                 | 0.88 | 0.07 | 0.02 | 0.02 | 0     | 0    | 0.07  | 0.06 | 0.04  | 0.04 |
| 7                 | 0.89 | 0.07 | 0.02 | 0.02 | 0     | 0    | 0.06  | 0.05 | 0.04  | 0.04 |
| 8                 | 0.91 | 0.06 | 0.02 | 0.02 | 0     | 0    | 0.04  | 0.05 | 0.03  | 0.03 |
| 9                 | 0.89 | 0.07 | 0.02 | 0.02 | 0     | 0    | 0.06  | 0.06 | 0.03  | 0.03 |
| 10                | 0.91 | 0.07 | 0.01 | 0.02 | 0     | 0    | 0.06  | 0.06 | 0.02  | 0.03 |
| 11                | 0.9  | 0.07 | 0.02 | 0.02 | 0     | 0    | 0.06  | 0.06 | 0.02  | 0.03 |
| 12                | 0.9  | 0.07 | 0.02 | 0.02 | 0     | 0    | 0.06  | 0.06 | 0.02  | 0.03 |

**age=50 years, timing allo <6 months, cmv=others, graft=BM, In vivo Tcell depletion=yes,**

| Landmark time (y) | GRFS | se   | GF   | se   | AGVHD | se   | CGVHD | se   | Death | se   |
|-------------------|------|------|------|------|-------|------|-------|------|-------|------|
| 0                 | 0.67 | 0.12 | 0.03 | 0.02 | 0.02  | 0.02 | 0.15  | 0.1  | 0.14  | 0.08 |
| 1                 | 0.71 | 0.12 | 0.02 | 0.02 | 0.01  | 0.02 | 0.15  | 0.1  | 0.1   | 0.07 |
| 2                 | 0.74 | 0.12 | 0.01 | 0.02 | 0     | 0.01 | 0.16  | 0.11 | 0.08  | 0.07 |
| 3                 | 0.75 | 0.12 | 0.01 | 0.02 | 0     | 0    | 0.16  | 0.11 | 0.07  | 0.07 |
| 4                 | 0.77 | 0.13 | 0.01 | 0.02 | 0     | 0    | 0.15  | 0.11 | 0.06  | 0.07 |
| 5                 | 0.81 | 0.13 | 0.01 | 0.02 | 0     | 0    | 0.12  | 0.11 | 0.06  | 0.07 |
| 6                 | 0.83 | 0.12 | 0.02 | 0.03 | 0     | 0    | 0.09  | 0.11 | 0.06  | 0.07 |
| 7                 | 0.85 | 0.12 | 0.02 | 0.03 | 0     | 0    | 0.08  | 0.1  | 0.06  | 0.07 |
| 8                 | 0.87 | 0.11 | 0.02 | 0.03 | 0     | 0    | 0.06  | 0.09 | 0.05  | 0.06 |
| 9                 | 0.85 | 0.13 | 0.02 | 0.03 | 0     | 0    | 0.09  | 0.11 | 0.05  | 0.06 |
| 10                | 0.87 | 0.13 | 0.01 | 0.02 | 0     | 0    | 0.09  | 0.12 | 0.03  | 0.06 |
| 11                | 0.86 | 0.13 | 0.02 | 0.03 | 0     | 0    | 0.09  | 0.12 | 0.03  | 0.06 |
| 12                | 0.86 | 0.13 | 0.02 | 0.03 | 0     | 0    | 0.09  | 0.12 | 0.03  | 0.06 |

**age=10 years, timing allo >6 months, cmv=D-/R-, graft=PBSC, In vivo Tcell depletion=yes,**

| Landmark time (y) | GRFS | se   | GF   | se   | AGVHD | se   | CGVHD | se   | Death | se   |
|-------------------|------|------|------|------|-------|------|-------|------|-------|------|
| 0                 | 0.88 | 0.08 | 0.04 | 0.04 | 0.05  | 0.06 | 0.01  | 0.01 | 0.02  | 0.03 |



|    |      |      |      |      |      |      |      |      |      |      |
|----|------|------|------|------|------|------|------|------|------|------|
| 1  | 0.9  | 0.08 | 0.03 | 0.04 | 0.04 | 0.06 | 0.01 | 0.02 | 0.02 | 0.03 |
| 2  | 0.95 | 0.06 | 0.02 | 0.04 | 0.01 | 0.04 | 0.01 | 0.02 | 0.02 | 0.03 |
| 3  | 0.96 | 0.05 | 0.02 | 0.04 | 0    | 0    | 0.01 | 0.02 | 0.01 | 0.03 |
| 4  | 0.96 | 0.05 | 0.02 | 0.04 | 0    | 0    | 0.01 | 0.02 | 0.01 | 0.03 |
| 5  | 0.97 | 0.05 | 0.02 | 0.04 | 0    | 0    | 0.01 | 0.02 | 0.01 | 0.02 |
| 6  | 0.96 | 0.06 | 0.03 | 0.05 | 0    | 0    | 0.01 | 0.01 | 0.01 | 0.02 |
| 7  | 0.96 | 0.06 | 0.03 | 0.05 | 0    | 0    | 0.01 | 0.01 | 0.01 | 0.02 |
| 8  | 0.96 | 0.06 | 0.03 | 0.05 | 0    | 0    | 0    | 0.01 | 0.01 | 0.02 |
| 9  | 0.96 | 0.06 | 0.03 | 0.05 | 0    | 0    | 0.01 | 0.02 | 0.01 | 0.02 |
| 10 | 0.97 | 0.05 | 0.02 | 0.05 | 0    | 0    | 0.01 | 0.02 | 0.01 | 0.02 |
| 11 | 0.96 | 0.07 | 0.03 | 0.06 | 0    | 0    | 0.01 | 0.02 | 0.01 | 0.02 |
| 12 | 0.96 | 0.07 | 0.03 | 0.06 | 0    | 0    | 0.01 | 0.02 | 0.01 | 0.02 |

**age=20 years, timing allo >6 months, cmv=D-/R-, graft=PBSC, In vivo Tcell depletion=yes,**

| Landmark time (y) | GRFS | se   | GF   | se   | AGVHD | se   | CGVHD | se   | Death | se   |
|-------------------|------|------|------|------|-------|------|-------|------|-------|------|
| 0                 | 0.85 | 0.09 | 0.04 | 0.04 | 0.05  | 0.06 | 0.01  | 0.02 | 0.04  | 0.04 |
| 1                 | 0.87 | 0.09 | 0.04 | 0.05 | 0.04  | 0.06 | 0.02  | 0.02 | 0.03  | 0.04 |
| 2                 | 0.93 | 0.07 | 0.02 | 0.04 | 0.01  | 0.04 | 0.02  | 0.02 | 0.02  | 0.04 |
| 3                 | 0.94 | 0.06 | 0.02 | 0.04 | 0     | 0    | 0.02  | 0.02 | 0.02  | 0.04 |
| 4                 | 0.95 | 0.06 | 0.02 | 0.04 | 0     | 0    | 0.02  | 0.02 | 0.02  | 0.04 |
| 5                 | 0.95 | 0.06 | 0.02 | 0.04 | 0     | 0    | 0.01  | 0.02 | 0.02  | 0.04 |
| 6                 | 0.95 | 0.07 | 0.03 | 0.05 | 0     | 0    | 0.01  | 0.02 | 0.02  | 0.04 |
| 7                 | 0.95 | 0.06 | 0.03 | 0.05 | 0     | 0    | 0.01  | 0.02 | 0.02  | 0.04 |
| 8                 | 0.95 | 0.06 | 0.03 | 0.05 | 0     | 0    | 0.01  | 0.02 | 0.01  | 0.03 |
| 9                 | 0.95 | 0.06 | 0.03 | 0.05 | 0     | 0    | 0.01  | 0.02 | 0.01  | 0.03 |
| 10                | 0.96 | 0.06 | 0.02 | 0.05 | 0     | 0    | 0.01  | 0.02 | 0.01  | 0.03 |
| 11                | 0.95 | 0.07 | 0.03 | 0.06 | 0     | 0    | 0.01  | 0.02 | 0.01  | 0.03 |
| 12                | 0.95 | 0.07 | 0.03 | 0.06 | 0     | 0    | 0.01  | 0.02 | 0.01  | 0.03 |

**age=30 years, timing allo >6 months, cmv=D-/R-, graft=PBSC, In vivo Tcell depletion=yes,**

| Landmark time (y) | GRFS | se   | GF   | se   | AGVHD | se   | CGVHD | se   | Death | se   |
|-------------------|------|------|------|------|-------|------|-------|------|-------|------|
| 0                 | 0.81 | 0.1  | 0.05 | 0.05 | 0.06  | 0.07 | 0.02  | 0.03 | 0.06  | 0.06 |
| 1                 | 0.84 | 0.1  | 0.04 | 0.05 | 0.05  | 0.07 | 0.02  | 0.03 | 0.04  | 0.06 |
| 2                 | 0.9  | 0.09 | 0.02 | 0.04 | 0.01  | 0.05 | 0.02  | 0.03 | 0.04  | 0.06 |
| 3                 | 0.92 | 0.08 | 0.02 | 0.04 | 0     | 0    | 0.02  | 0.03 | 0.04  | 0.06 |
| 4                 | 0.93 | 0.08 | 0.02 | 0.04 | 0     | 0    | 0.02  | 0.03 | 0.03  | 0.06 |
| 5                 | 0.94 | 0.07 | 0.02 | 0.04 | 0     | 0    | 0.02  | 0.03 | 0.03  | 0.06 |
| 6                 | 0.93 | 0.08 | 0.03 | 0.06 | 0     | 0    | 0.01  | 0.03 | 0.03  | 0.06 |
| 7                 | 0.93 | 0.08 | 0.03 | 0.06 | 0     | 0    | 0.01  | 0.02 | 0.03  | 0.06 |
| 8                 | 0.94 | 0.08 | 0.03 | 0.06 | 0     | 0    | 0.01  | 0.02 | 0.02  | 0.05 |
| 9                 | 0.94 | 0.08 | 0.03 | 0.06 | 0     | 0    | 0.01  | 0.03 | 0.02  | 0.05 |
| 10                | 0.95 | 0.07 | 0.02 | 0.05 | 0     | 0    | 0.01  | 0.03 | 0.01  | 0.05 |
| 11                | 0.93 | 0.09 | 0.04 | 0.07 | 0     | 0    | 0.01  | 0.03 | 0.01  | 0.05 |
| 12                | 0.93 | 0.09 | 0.04 | 0.07 | 0     | 0    | 0.01  | 0.03 | 0.01  | 0.05 |

**age=40 years, timing allo >6 months, cmv=D-/R-, graft=PBSC, In vivo Tcell depletion=yes,**

| Landmark time (y) | GRFS | se   | GF   | se   | AGVHD | se   | CGVHD | se   | Death | se   |
|-------------------|------|------|------|------|-------|------|-------|------|-------|------|
| 0                 | 0.75 | 0.13 | 0.05 | 0.05 | 0.07  | 0.08 | 0.03  | 0.04 | 0.1   | 0.1  |
| 1                 | 0.79 | 0.13 | 0.05 | 0.06 | 0.06  | 0.08 | 0.03  | 0.04 | 0.07  | 0.1  |
| 2                 | 0.87 | 0.12 | 0.02 | 0.04 | 0.02  | 0.06 | 0.03  | 0.04 | 0.06  | 0.1  |
| 3                 | 0.89 | 0.11 | 0.02 | 0.05 | 0     | 0    | 0.03  | 0.04 | 0.06  | 0.1  |
| 4                 | 0.9  | 0.11 | 0.02 | 0.05 | 0     | 0    | 0.03  | 0.04 | 0.05  | 0.09 |
| 5                 | 0.91 | 0.11 | 0.02 | 0.05 | 0     | 0    | 0.03  | 0.04 | 0.04  | 0.09 |
| 6                 | 0.9  | 0.11 | 0.04 | 0.06 | 0     | 0    | 0.02  | 0.04 | 0.04  | 0.09 |
| 7                 | 0.91 | 0.11 | 0.04 | 0.06 | 0     | 0    | 0.02  | 0.04 | 0.04  | 0.09 |
| 8                 | 0.92 | 0.11 | 0.04 | 0.07 | 0     | 0    | 0.01  | 0.03 | 0.03  | 0.08 |
| 9                 | 0.91 | 0.11 | 0.04 | 0.07 | 0     | 0    | 0.02  | 0.04 | 0.03  | 0.08 |
| 10                | 0.93 | 0.1  | 0.03 | 0.06 | 0     | 0    | 0.02  | 0.04 | 0.02  | 0.07 |
| 11                | 0.92 | 0.11 | 0.04 | 0.08 | 0     | 0    | 0.02  | 0.04 | 0.02  | 0.07 |
| 12                | 0.92 | 0.11 | 0.04 | 0.08 | 0     | 0    | 0.02  | 0.04 | 0.02  | 0.07 |

**age=50 years, timing allo >6 months, cmv=D-/R-, graft=PBSC, In vivo Tcell depletion=yes,**

| Landmark time (y) | GRFS | se   | GF   | se   | AGVHD | se   | CGVHD | se   | Death | se   |
|-------------------|------|------|------|------|-------|------|-------|------|-------|------|
| 0                 | 0.68 | 0.17 | 0.06 | 0.06 | 0.08  | 0.1  | 0.04  | 0.05 | 0.15  | 0.15 |
| 1                 | 0.73 | 0.18 | 0.05 | 0.07 | 0.07  | 0.1  | 0.04  | 0.05 | 0.11  | 0.15 |
| 2                 | 0.82 | 0.18 | 0.02 | 0.05 | 0.02  | 0.07 | 0.05  | 0.06 | 0.1   | 0.16 |
| 3                 | 0.84 | 0.17 | 0.02 | 0.05 | 0     | 0    | 0.05  | 0.06 | 0.09  | 0.15 |
| 4                 | 0.85 | 0.16 | 0.02 | 0.06 | 0     | 0    | 0.04  | 0.06 | 0.08  | 0.15 |
| 5                 | 0.87 | 0.16 | 0.02 | 0.06 | 0     | 0    | 0.04  | 0.06 | 0.07  | 0.14 |
| 6                 | 0.87 | 0.17 | 0.04 | 0.08 | 0     | 0    | 0.03  | 0.06 | 0.07  | 0.14 |
| 7                 | 0.87 | 0.17 | 0.04 | 0.08 | 0     | 0    | 0.02  | 0.05 | 0.07  | 0.14 |
| 8                 | 0.89 | 0.16 | 0.04 | 0.08 | 0     | 0    | 0.02  | 0.05 | 0.05  | 0.13 |
| 9                 | 0.88 | 0.16 | 0.04 | 0.08 | 0     | 0    | 0.02  | 0.06 | 0.05  | 0.13 |
| 10                | 0.91 | 0.15 | 0.03 | 0.07 | 0     | 0    | 0.02  | 0.06 | 0.04  | 0.12 |
| 11                | 0.89 | 0.16 | 0.05 | 0.1  | 0     | 0    | 0.02  | 0.06 | 0.04  | 0.12 |
| 12                | 0.89 | 0.16 | 0.05 | 0.1  | 0     | 0    | 0.02  | 0.06 | 0.04  | 0.12 |

**age=10 years, timing allo <6 months, cmv=D-/R-, graft=PBSC, In vivo Tcell depletion=yes,**

| Landmark time (y) | GRFS | se   | GF   | se   | AGVHD | se   | CGVHD | se   | Death | se   |
|-------------------|------|------|------|------|-------|------|-------|------|-------|------|
| 0                 | 0.95 | 0.03 | 0.01 | 0.01 | 0.02  | 0.03 | 0.01  | 0.01 | 0.01  | 0.01 |
| 1                 | 0.96 | 0.03 | 0.01 | 0.01 | 0.02  | 0.03 | 0.01  | 0.01 | 0     | 0.01 |
| 2                 | 0.98 | 0.02 | 0    | 0.01 | 0.01  | 0.02 | 0.01  | 0.01 | 0     | 0.01 |
| 3                 | 0.99 | 0.01 | 0    | 0.01 | 0     | 0    | 0.01  | 0.01 | 0     | 0.01 |
| 4                 | 0.99 | 0.01 | 0    | 0.01 | 0     | 0    | 0.01  | 0.01 | 0     | 0.01 |
| 5                 | 0.99 | 0.01 | 0    | 0.01 | 0     | 0    | 0     | 0.01 | 0     | 0.01 |
| 6                 | 0.99 | 0.02 | 0.01 | 0.01 | 0     | 0    | 0     | 0.01 | 0     | 0.01 |
| 7                 | 0.99 | 0.02 | 0.01 | 0.01 | 0     | 0    | 0     | 0.01 | 0     | 0.01 |
| 8                 | 0.99 | 0.02 | 0.01 | 0.01 | 0     | 0    | 0     | 0.01 | 0     | 0.01 |

|    |      |      |      |      |   |   |   |      |   |      |
|----|------|------|------|------|---|---|---|------|---|------|
| 9  | 0.99 | 0.02 | 0.01 | 0.01 | 0 | 0 | 0 | 0.01 | 0 | 0.01 |
| 10 | 0.99 | 0.01 | 0.01 | 0.01 | 0 | 0 | 0 | 0.01 | 0 | 0    |
| 11 | 0.99 | 0.02 | 0.01 | 0.02 | 0 | 0 | 0 | 0.01 | 0 | 0    |
| 12 | 0.99 | 0.02 | 0.01 | 0.02 | 0 | 0 | 0 | 0.01 | 0 | 0    |

**age=20 years, timing allo <6 months, cmv=D-/R-, graft=PBSC, In vivo Tcell depletion=yes,**

| Landmark time (y) | GRFS | se   | GF   | se   | AGVHD | se   | CGVHD | se   | Death | se   |
|-------------------|------|------|------|------|-------|------|-------|------|-------|------|
| 0                 | 0.94 | 0.03 | 0.01 | 0.01 | 0.03  | 0.03 | 0.01  | 0.01 | 0.01  | 0.01 |
| 1                 | 0.95 | 0.03 | 0.01 | 0.01 | 0.02  | 0.03 | 0.01  | 0.01 | 0.01  | 0.01 |
| 2                 | 0.98 | 0.02 | 0    | 0.01 | 0.01  | 0.02 | 0.01  | 0.01 | 0.01  | 0.01 |
| 3                 | 0.98 | 0.02 | 0    | 0.01 | 0     | 0    | 0.01  | 0.01 | 0.01  | 0.01 |
| 4                 | 0.98 | 0.02 | 0    | 0.01 | 0     | 0    | 0.01  | 0.01 | 0     | 0.01 |
| 5                 | 0.99 | 0.02 | 0    | 0.01 | 0     | 0    | 0.01  | 0.01 | 0     | 0.01 |
| 6                 | 0.98 | 0.02 | 0.01 | 0.01 | 0     | 0    | 0     | 0.01 | 0     | 0.01 |
| 7                 | 0.98 | 0.02 | 0.01 | 0.01 | 0     | 0    | 0     | 0.01 | 0     | 0.01 |
| 8                 | 0.99 | 0.02 | 0.01 | 0.01 | 0     | 0    | 0     | 0.01 | 0     | 0.01 |
| 9                 | 0.98 | 0.02 | 0.01 | 0.01 | 0     | 0    | 0     | 0.01 | 0     | 0.01 |
| 10                | 0.99 | 0.02 | 0.01 | 0.01 | 0     | 0    | 0     | 0.01 | 0     | 0.01 |
| 11                | 0.98 | 0.02 | 0.01 | 0.02 | 0     | 0    | 0     | 0.01 | 0     | 0.01 |
| 12                | 0.98 | 0.02 | 0.01 | 0.02 | 0     | 0    | 0     | 0.01 | 0     | 0.01 |

**age=30 years, timing allo <6 months, cmv=D-/R-, graft=PBSC, In vivo Tcell depletion=yes,**

| Landmark time (y) | GRFS | se   | GF   | se   | AGVHD | se   | CGVHD | se   | Death | se   |
|-------------------|------|------|------|------|-------|------|-------|------|-------|------|
| 0                 | 0.93 | 0.04 | 0.01 | 0.01 | 0.03  | 0.03 | 0.01  | 0.01 | 0.02  | 0.02 |
| 1                 | 0.94 | 0.04 | 0.01 | 0.01 | 0.02  | 0.03 | 0.01  | 0.01 | 0.01  | 0.02 |
| 2                 | 0.97 | 0.03 | 0.01 | 0.01 | 0.01  | 0.02 | 0.01  | 0.01 | 0.01  | 0.02 |
| 3                 | 0.97 | 0.02 | 0.01 | 0.01 | 0     | 0    | 0.01  | 0.01 | 0.01  | 0.02 |
| 4                 | 0.98 | 0.02 | 0.01 | 0.01 | 0     | 0    | 0.01  | 0.01 | 0.01  | 0.02 |
| 5                 | 0.98 | 0.02 | 0.01 | 0.01 | 0     | 0    | 0.01  | 0.01 | 0.01  | 0.01 |
| 6                 | 0.98 | 0.02 | 0.01 | 0.02 | 0     | 0    | 0.01  | 0.01 | 0.01  | 0.01 |
| 7                 | 0.98 | 0.02 | 0.01 | 0.02 | 0     | 0    | 0.01  | 0.01 | 0.01  | 0.01 |
| 8                 | 0.98 | 0.02 | 0.01 | 0.02 | 0     | 0    | 0     | 0.01 | 0.01  | 0.01 |
| 9                 | 0.98 | 0.02 | 0.01 | 0.02 | 0     | 0    | 0.01  | 0.01 | 0.01  | 0.01 |
| 10                | 0.98 | 0.02 | 0.01 | 0.01 | 0     | 0    | 0.01  | 0.01 | 0     | 0.01 |
| 11                | 0.98 | 0.03 | 0.01 | 0.02 | 0     | 0    | 0.01  | 0.01 | 0     | 0.01 |
| 12                | 0.98 | 0.03 | 0.01 | 0.02 | 0     | 0    | 0.01  | 0.01 | 0     | 0.01 |

**age=40 years, timing allo <6 months, cmv=D-/R-, graft=PBSC, In vivo Tcell depletion=yes,**

| Landmark time (y) | GRFS | se   | GF   | se   | AGVHD | se   | CGVHD | se   | Death | se   |
|-------------------|------|------|------|------|-------|------|-------|------|-------|------|
| 0                 | 0.91 | 0.05 | 0.02 | 0.02 | 0.03  | 0.04 | 0.02  | 0.02 | 0.03  | 0.03 |
| 1                 | 0.92 | 0.05 | 0.01 | 0.02 | 0.03  | 0.04 | 0.02  | 0.02 | 0.02  | 0.03 |
| 2                 | 0.95 | 0.04 | 0.01 | 0.01 | 0.01  | 0.02 | 0.02  | 0.02 | 0.02  | 0.03 |
| 3                 | 0.96 | 0.04 | 0.01 | 0.01 | 0     | 0    | 0.02  | 0.02 | 0.01  | 0.03 |
| 4                 | 0.97 | 0.03 | 0.01 | 0.01 | 0     | 0    | 0.02  | 0.02 | 0.01  | 0.02 |

|    |      |      |      |      |   |   |      |      |      |      |
|----|------|------|------|------|---|---|------|------|------|------|
| 5  | 0.97 | 0.03 | 0.01 | 0.01 | 0 | 0 | 0.01 | 0.02 | 0.01 | 0.02 |
| 6  | 0.97 | 0.03 | 0.01 | 0.02 | 0 | 0 | 0.01 | 0.02 | 0.01 | 0.02 |
| 7  | 0.97 | 0.03 | 0.01 | 0.02 | 0 | 0 | 0.01 | 0.02 | 0.01 | 0.02 |
| 8  | 0.98 | 0.03 | 0.01 | 0.02 | 0 | 0 | 0.01 | 0.02 | 0.01 | 0.02 |
| 9  | 0.97 | 0.03 | 0.01 | 0.02 | 0 | 0 | 0.01 | 0.02 | 0.01 | 0.02 |
| 10 | 0.98 | 0.03 | 0.01 | 0.02 | 0 | 0 | 0.01 | 0.02 | 0.01 | 0.02 |
| 11 | 0.97 | 0.04 | 0.01 | 0.02 | 0 | 0 | 0.01 | 0.02 | 0.01 | 0.02 |
| 12 | 0.97 | 0.04 | 0.01 | 0.02 | 0 | 0 | 0.01 | 0.02 | 0.01 | 0.02 |

**age=50 years, timing allo <6 months, cmv=D-/R-, graft=PBSC, In vivo Tcell depletion=yes,**

| Landmark time (y) | GRFS | se   | GF   | se   | AGVHD | se   | CGVHD | se   | Death | se   |
|-------------------|------|------|------|------|-------|------|-------|------|-------|------|
| 0                 | 0.88 | 0.07 | 0.02 | 0.02 | 0.04  | 0.05 | 0.02  | 0.03 | 0.04  | 0.04 |
| 1                 | 0.9  | 0.07 | 0.02 | 0.02 | 0.03  | 0.05 | 0.02  | 0.03 | 0.03  | 0.04 |
| 2                 | 0.93 | 0.06 | 0.01 | 0.02 | 0.01  | 0.03 | 0.02  | 0.03 | 0.03  | 0.04 |
| 3                 | 0.95 | 0.05 | 0.01 | 0.02 | 0     | 0    | 0.03  | 0.03 | 0.02  | 0.04 |
| 4                 | 0.95 | 0.05 | 0.01 | 0.02 | 0     | 0    | 0.02  | 0.03 | 0.02  | 0.04 |
| 5                 | 0.96 | 0.05 | 0.01 | 0.02 | 0     | 0    | 0.02  | 0.03 | 0.02  | 0.04 |
| 6                 | 0.96 | 0.05 | 0.01 | 0.02 | 0     | 0    | 0.01  | 0.03 | 0.02  | 0.04 |
| 7                 | 0.96 | 0.05 | 0.01 | 0.02 | 0     | 0    | 0.01  | 0.03 | 0.02  | 0.04 |
| 8                 | 0.97 | 0.05 | 0.01 | 0.02 | 0     | 0    | 0.01  | 0.02 | 0.01  | 0.03 |
| 9                 | 0.96 | 0.05 | 0.01 | 0.02 | 0     | 0    | 0.01  | 0.03 | 0.01  | 0.03 |
| 10                | 0.97 | 0.05 | 0.01 | 0.02 | 0     | 0    | 0.01  | 0.03 | 0.01  | 0.03 |
| 11                | 0.96 | 0.05 | 0.01 | 0.03 | 0     | 0    | 0.01  | 0.03 | 0.01  | 0.03 |
| 12                | 0.96 | 0.05 | 0.01 | 0.03 | 0     | 0    | 0.01  | 0.03 | 0.01  | 0.03 |

**age=10 years, timing allo >6 months, cmv=others, graft=PBSC, In vivo Tcell depletion=yes,**

| Landmark time (y) | GRFS | se   | GF   | se   | AGVHD | se   | CGVHD | se   | Death | se   |
|-------------------|------|------|------|------|-------|------|-------|------|-------|------|
| 0                 | 0.79 | 0.1  | 0.04 | 0.04 | 0.07  | 0.07 | 0.01  | 0.02 | 0.09  | 0.06 |
| 1                 | 0.83 | 0.1  | 0.04 | 0.04 | 0.06  | 0.07 | 0.02  | 0.02 | 0.06  | 0.06 |
| 2                 | 0.89 | 0.09 | 0.02 | 0.03 | 0.02  | 0.05 | 0.02  | 0.02 | 0.06  | 0.06 |
| 3                 | 0.91 | 0.07 | 0.02 | 0.03 | 0     | 0    | 0.02  | 0.02 | 0.05  | 0.06 |
| 4                 | 0.92 | 0.07 | 0.02 | 0.04 | 0     | 0    | 0.02  | 0.02 | 0.04  | 0.06 |
| 5                 | 0.93 | 0.07 | 0.02 | 0.04 | 0     | 0    | 0.01  | 0.02 | 0.04  | 0.06 |
| 6                 | 0.92 | 0.08 | 0.03 | 0.05 | 0     | 0    | 0.01  | 0.02 | 0.04  | 0.06 |
| 7                 | 0.93 | 0.08 | 0.03 | 0.05 | 0     | 0    | 0.01  | 0.02 | 0.04  | 0.06 |
| 8                 | 0.94 | 0.07 | 0.03 | 0.05 | 0     | 0    | 0.01  | 0.02 | 0.03  | 0.05 |
| 9                 | 0.93 | 0.07 | 0.03 | 0.05 | 0     | 0    | 0.01  | 0.02 | 0.03  | 0.05 |
| 10                | 0.95 | 0.07 | 0.02 | 0.04 | 0     | 0    | 0.01  | 0.02 | 0.02  | 0.05 |
| 11                | 0.94 | 0.08 | 0.03 | 0.06 | 0     | 0    | 0.01  | 0.02 | 0.02  | 0.05 |
| 12                | 0.94 | 0.08 | 0.03 | 0.06 | 0     | 0    | 0.01  | 0.02 | 0.02  | 0.05 |

**age=20 years, timing allo >6 months, cmv=others, graft=PBSC, In vivo Tcell depletion=yes,**

| Landmark time (y) | GRFS | se  | GF   | se   | AGVHD | se   | CGVHD | se   | Death | se   |
|-------------------|------|-----|------|------|-------|------|-------|------|-------|------|
| 0                 | 0.72 | 0.1 | 0.05 | 0.04 | 0.08  | 0.07 | 0.02  | 0.02 | 0.14  | 0.08 |

|    |      |      |      |      |      |      |      |      |      |      |
|----|------|------|------|------|------|------|------|------|------|------|
| 1  | 0.77 | 0.1  | 0.04 | 0.04 | 0.07 | 0.07 | 0.02 | 0.02 | 0.1  | 0.08 |
| 2  | 0.85 | 0.1  | 0.02 | 0.03 | 0.02 | 0.05 | 0.02 | 0.03 | 0.09 | 0.08 |
| 3  | 0.88 | 0.09 | 0.02 | 0.03 | 0    | 0    | 0.02 | 0.03 | 0.08 | 0.08 |
| 4  | 0.89 | 0.09 | 0.02 | 0.03 | 0    | 0    | 0.02 | 0.03 | 0.07 | 0.08 |
| 5  | 0.9  | 0.08 | 0.02 | 0.03 | 0    | 0    | 0.02 | 0.03 | 0.06 | 0.07 |
| 6  | 0.9  | 0.09 | 0.03 | 0.05 | 0    | 0    | 0.01 | 0.03 | 0.06 | 0.07 |
| 7  | 0.9  | 0.09 | 0.03 | 0.05 | 0    | 0    | 0.01 | 0.02 | 0.06 | 0.07 |
| 8  | 0.91 | 0.08 | 0.03 | 0.05 | 0    | 0    | 0.01 | 0.02 | 0.05 | 0.07 |
| 9  | 0.91 | 0.08 | 0.03 | 0.05 | 0    | 0    | 0.01 | 0.03 | 0.05 | 0.07 |
| 10 | 0.93 | 0.08 | 0.02 | 0.04 | 0    | 0    | 0.01 | 0.03 | 0.03 | 0.06 |
| 11 | 0.92 | 0.08 | 0.04 | 0.06 | 0    | 0    | 0.01 | 0.03 | 0.03 | 0.06 |
| 12 | 0.92 | 0.08 | 0.04 | 0.06 | 0    | 0    | 0.01 | 0.03 | 0.03 | 0.06 |

**age=30 years, timing allo >6 months, cmv=others, graft=PBSC, In vivo Tcell depletion=yes,**

| Landmark time (y) | GRFS | se   | GF   | se   | AGVHD | se   | CGVHD | se   | Death | se   |
|-------------------|------|------|------|------|-------|------|-------|------|-------|------|
| 0                 | 0.63 | 0.11 | 0.05 | 0.04 | 0.09  | 0.06 | 0.03  | 0.03 | 0.21  | 0.09 |
| 1                 | 0.7  | 0.11 | 0.05 | 0.04 | 0.07  | 0.07 | 0.03  | 0.03 | 0.15  | 0.09 |
| 2                 | 0.79 | 0.11 | 0.02 | 0.03 | 0.02  | 0.04 | 0.03  | 0.03 | 0.14  | 0.1  |
| 3                 | 0.82 | 0.11 | 0.02 | 0.03 | 0     | 0    | 0.03  | 0.04 | 0.13  | 0.1  |
| 4                 | 0.84 | 0.11 | 0.02 | 0.03 | 0     | 0    | 0.03  | 0.04 | 0.11  | 0.1  |
| 5                 | 0.86 | 0.1  | 0.02 | 0.03 | 0     | 0    | 0.03  | 0.04 | 0.09  | 0.09 |
| 6                 | 0.85 | 0.1  | 0.03 | 0.05 | 0     | 0    | 0.02  | 0.03 | 0.09  | 0.09 |
| 7                 | 0.85 | 0.1  | 0.04 | 0.05 | 0     | 0    | 0.02  | 0.03 | 0.09  | 0.09 |
| 8                 | 0.88 | 0.1  | 0.04 | 0.05 | 0     | 0    | 0.01  | 0.03 | 0.07  | 0.09 |
| 9                 | 0.87 | 0.1  | 0.04 | 0.05 | 0     | 0    | 0.02  | 0.03 | 0.07  | 0.09 |
| 10                | 0.9  | 0.09 | 0.03 | 0.04 | 0     | 0    | 0.02  | 0.04 | 0.05  | 0.08 |
| 11                | 0.89 | 0.1  | 0.04 | 0.06 | 0     | 0    | 0.02  | 0.04 | 0.05  | 0.08 |
| 12                | 0.89 | 0.1  | 0.04 | 0.06 | 0     | 0    | 0.02  | 0.04 | 0.05  | 0.08 |

**age=40 years, timing allo >6 months, cmv=others, graft=PBSC, In vivo Tcell depletion=yes,**

| Landmark time (y) | GRFS | se   | GF   | se   | AGVHD | se   | CGVHD | se   | Death | se   |
|-------------------|------|------|------|------|-------|------|-------|------|-------|------|
| 0                 | 0.52 | 0.12 | 0.05 | 0.04 | 0.09  | 0.07 | 0.03  | 0.03 | 0.31  | 0.11 |
| 1                 | 0.6  | 0.13 | 0.05 | 0.04 | 0.08  | 0.07 | 0.04  | 0.04 | 0.23  | 0.12 |
| 2                 | 0.7  | 0.14 | 0.02 | 0.03 | 0.02  | 0.05 | 0.04  | 0.05 | 0.21  | 0.13 |
| 3                 | 0.74 | 0.14 | 0.02 | 0.03 | 0     | 0    | 0.05  | 0.05 | 0.2   | 0.13 |
| 4                 | 0.76 | 0.14 | 0.02 | 0.04 | 0     | 0    | 0.04  | 0.05 | 0.17  | 0.13 |
| 5                 | 0.79 | 0.13 | 0.02 | 0.04 | 0     | 0    | 0.04  | 0.05 | 0.15  | 0.12 |
| 6                 | 0.79 | 0.14 | 0.04 | 0.05 | 0     | 0    | 0.03  | 0.04 | 0.15  | 0.13 |
| 7                 | 0.79 | 0.13 | 0.04 | 0.05 | 0     | 0    | 0.02  | 0.04 | 0.15  | 0.13 |
| 8                 | 0.83 | 0.13 | 0.04 | 0.05 | 0     | 0    | 0.02  | 0.04 | 0.12  | 0.12 |
| 9                 | 0.82 | 0.13 | 0.04 | 0.05 | 0     | 0    | 0.02  | 0.05 | 0.12  | 0.12 |
| 10                | 0.86 | 0.12 | 0.03 | 0.05 | 0     | 0    | 0.02  | 0.05 | 0.09  | 0.11 |
| 11                | 0.84 | 0.13 | 0.05 | 0.06 | 0     | 0    | 0.02  | 0.05 | 0.09  | 0.11 |
| 12                | 0.84 | 0.13 | 0.05 | 0.06 | 0     | 0    | 0.02  | 0.05 | 0.09  | 0.11 |

**age=50 years, timing allo >6 months, cmv=others, graft=PBSC, In vivo Tcell depletion=yes,**

| Landmark time (y) | GRFS | se   | GF   | se   | AGVHD | se   | CGVHD | se   | Death | se   |
|-------------------|------|------|------|------|-------|------|-------|------|-------|------|
| 0                 | 0.38 | 0.14 | 0.05 | 0.04 | 0.1   | 0.08 | 0.04  | 0.04 | 0.44  | 0.14 |
| 1                 | 0.47 | 0.16 | 0.05 | 0.05 | 0.09  | 0.09 | 0.05  | 0.05 | 0.34  | 0.16 |
| 2                 | 0.58 | 0.18 | 0.02 | 0.04 | 0.03  | 0.07 | 0.06  | 0.06 | 0.32  | 0.18 |
| 3                 | 0.62 | 0.19 | 0.02 | 0.04 | 0     | 0    | 0.06  | 0.06 | 0.3   | 0.19 |
| 4                 | 0.66 | 0.19 | 0.02 | 0.04 | 0     | 0    | 0.06  | 0.07 | 0.26  | 0.19 |
| 5                 | 0.7  | 0.19 | 0.02 | 0.04 | 0     | 0    | 0.05  | 0.07 | 0.23  | 0.19 |
| 6                 | 0.7  | 0.19 | 0.04 | 0.06 | 0     | 0    | 0.04  | 0.06 | 0.23  | 0.19 |
| 7                 | 0.7  | 0.19 | 0.04 | 0.06 | 0     | 0    | 0.03  | 0.06 | 0.23  | 0.19 |
| 8                 | 0.75 | 0.19 | 0.04 | 0.06 | 0     | 0    | 0.02  | 0.05 | 0.18  | 0.18 |
| 9                 | 0.74 | 0.19 | 0.04 | 0.06 | 0     | 0    | 0.03  | 0.06 | 0.18  | 0.18 |
| 10                | 0.8  | 0.18 | 0.03 | 0.06 | 0     | 0    | 0.03  | 0.07 | 0.14  | 0.17 |
| 11                | 0.78 | 0.18 | 0.05 | 0.08 | 0     | 0    | 0.03  | 0.07 | 0.14  | 0.17 |
| 12                | 0.78 | 0.18 | 0.05 | 0.08 | 0     | 0    | 0.03  | 0.07 | 0.14  | 0.17 |

**age=10 years, timing allo <6 months, cmv=others, graft=PBSC, In vivo Tcell depletion=yes,**

| Landmark time (y) | GRFS | se   | GF   | se   | AGVHD | se   | CGVHD | se   | Death | se   |
|-------------------|------|------|------|------|-------|------|-------|------|-------|------|
| 0                 | 0.92 | 0.04 | 0.01 | 0.01 | 0.03  | 0.04 | 0.01  | 0.01 | 0.02  | 0.02 |
| 1                 | 0.94 | 0.04 | 0.01 | 0.01 | 0.03  | 0.04 | 0.01  | 0.01 | 0.02  | 0.02 |
| 2                 | 0.96 | 0.03 | 0    | 0.01 | 0.01  | 0.02 | 0.01  | 0.01 | 0.01  | 0.02 |
| 3                 | 0.97 | 0.02 | 0    | 0.01 | 0     | 0    | 0.01  | 0.01 | 0.01  | 0.02 |
| 4                 | 0.98 | 0.02 | 0    | 0.01 | 0     | 0    | 0.01  | 0.01 | 0.01  | 0.02 |
| 5                 | 0.98 | 0.02 | 0    | 0.01 | 0     | 0    | 0.01  | 0.01 | 0.01  | 0.02 |
| 6                 | 0.98 | 0.02 | 0.01 | 0.01 | 0     | 0    | 0     | 0.01 | 0.01  | 0.02 |
| 7                 | 0.98 | 0.02 | 0.01 | 0.01 | 0     | 0    | 0     | 0.01 | 0.01  | 0.02 |
| 8                 | 0.98 | 0.02 | 0.01 | 0.01 | 0     | 0    | 0     | 0.01 | 0.01  | 0.01 |
| 9                 | 0.98 | 0.02 | 0.01 | 0.01 | 0     | 0    | 0     | 0.01 | 0.01  | 0.01 |
| 10                | 0.98 | 0.02 | 0.01 | 0.01 | 0     | 0    | 0     | 0.01 | 0.01  | 0.01 |
| 11                | 0.98 | 0.02 | 0.01 | 0.02 | 0     | 0    | 0     | 0.01 | 0.01  | 0.01 |
| 12                | 0.98 | 0.02 | 0.01 | 0.02 | 0     | 0    | 0     | 0.01 | 0.01  | 0.01 |

**age=20 years, timing allo <6 months, cmv=others, graft=PBSC, In vivo Tcell depletion=yes,**

| Landmark time (y) | GRFS | se   | GF   | se   | AGVHD | se   | CGVHD | se   | Death | se   |
|-------------------|------|------|------|------|-------|------|-------|------|-------|------|
| 0                 | 0.9  | 0.05 | 0.01 | 0.01 | 0.04  | 0.04 | 0.01  | 0.01 | 0.04  | 0.02 |
| 1                 | 0.92 | 0.04 | 0.01 | 0.01 | 0.03  | 0.03 | 0.01  | 0.01 | 0.03  | 0.02 |
| 2                 | 0.95 | 0.04 | 0.01 | 0.01 | 0.01  | 0.02 | 0.01  | 0.01 | 0.02  | 0.02 |
| 3                 | 0.96 | 0.03 | 0.01 | 0.01 | 0     | 0    | 0.01  | 0.01 | 0.02  | 0.02 |
| 4                 | 0.97 | 0.03 | 0.01 | 0.01 | 0     | 0    | 0.01  | 0.01 | 0.02  | 0.02 |
| 5                 | 0.97 | 0.03 | 0.01 | 0.01 | 0     | 0    | 0.01  | 0.01 | 0.01  | 0.02 |
| 6                 | 0.97 | 0.03 | 0.01 | 0.01 | 0     | 0    | 0.01  | 0.01 | 0.01  | 0.02 |
| 7                 | 0.97 | 0.03 | 0.01 | 0.01 | 0     | 0    | 0.01  | 0.01 | 0.01  | 0.02 |
| 8                 | 0.98 | 0.03 | 0.01 | 0.01 | 0     | 0    | 0     | 0.01 | 0.01  | 0.02 |

|    |      |      |      |      |   |   |      |      |      |      |
|----|------|------|------|------|---|---|------|------|------|------|
| 9  | 0.97 | 0.03 | 0.01 | 0.01 | 0 | 0 | 0.01 | 0.01 | 0.01 | 0.02 |
| 10 | 0.98 | 0.02 | 0.01 | 0.01 | 0 | 0 | 0.01 | 0.01 | 0.01 | 0.02 |
| 11 | 0.97 | 0.03 | 0.01 | 0.02 | 0 | 0 | 0.01 | 0.01 | 0.01 | 0.02 |
| 12 | 0.97 | 0.03 | 0.01 | 0.02 | 0 | 0 | 0.01 | 0.01 | 0.01 | 0.02 |

**age=30 years, timing allo <6 months, cmv=others, graft=PBSC, In vivo Tcell depletion=yes,**

| Landmark time (y) | GRFS | se   | GF   | se   | AGVHD | se   | CGVHD | se   | Death | se   |
|-------------------|------|------|------|------|-------|------|-------|------|-------|------|
| 0                 | 0.87 | 0.05 | 0.01 | 0.01 | 0.05  | 0.04 | 0.02  | 0.02 | 0.06  | 0.03 |
| 1                 | 0.89 | 0.05 | 0.01 | 0.01 | 0.04  | 0.04 | 0.02  | 0.02 | 0.04  | 0.03 |
| 2                 | 0.93 | 0.04 | 0.01 | 0.01 | 0.01  | 0.02 | 0.02  | 0.02 | 0.04  | 0.03 |
| 3                 | 0.94 | 0.04 | 0.01 | 0.01 | 0     | 0    | 0.02  | 0.02 | 0.03  | 0.03 |
| 4                 | 0.95 | 0.04 | 0.01 | 0.01 | 0     | 0    | 0.02  | 0.02 | 0.03  | 0.03 |
| 5                 | 0.96 | 0.03 | 0.01 | 0.01 | 0     | 0    | 0.01  | 0.02 | 0.02  | 0.03 |
| 6                 | 0.96 | 0.04 | 0.01 | 0.01 | 0     | 0    | 0.01  | 0.02 | 0.02  | 0.03 |
| 7                 | 0.96 | 0.03 | 0.01 | 0.01 | 0     | 0    | 0.01  | 0.02 | 0.02  | 0.03 |
| 8                 | 0.96 | 0.03 | 0.01 | 0.01 | 0     | 0    | 0.01  | 0.01 | 0.02  | 0.03 |
| 9                 | 0.96 | 0.03 | 0.01 | 0.01 | 0     | 0    | 0.01  | 0.02 | 0.02  | 0.03 |
| 10                | 0.97 | 0.03 | 0.01 | 0.01 | 0     | 0    | 0.01  | 0.02 | 0.01  | 0.02 |
| 11                | 0.97 | 0.03 | 0.01 | 0.02 | 0     | 0    | 0.01  | 0.02 | 0.01  | 0.02 |
| 12                | 0.97 | 0.03 | 0.01 | 0.02 | 0     | 0    | 0.01  | 0.02 | 0.01  | 0.02 |

**age=40 years, timing allo <6 months, cmv=others, graft=PBSC, In vivo Tcell depletion=yes,**

| Landmark time (y) | GRFS | se   | GF   | se   | AGVHD | se   | CGVHD | se   | Death | se   |
|-------------------|------|------|------|------|-------|------|-------|------|-------|------|
| 0                 | 0.82 | 0.07 | 0.02 | 0.01 | 0.05  | 0.04 | 0.02  | 0.02 | 0.09  | 0.05 |
| 1                 | 0.85 | 0.07 | 0.02 | 0.01 | 0.04  | 0.04 | 0.02  | 0.02 | 0.07  | 0.05 |
| 2                 | 0.9  | 0.06 | 0.01 | 0.01 | 0.01  | 0.03 | 0.03  | 0.03 | 0.06  | 0.05 |
| 3                 | 0.92 | 0.05 | 0.01 | 0.01 | 0     | 0    | 0.03  | 0.03 | 0.05  | 0.05 |
| 4                 | 0.92 | 0.05 | 0.01 | 0.01 | 0     | 0    | 0.02  | 0.03 | 0.05  | 0.04 |
| 5                 | 0.94 | 0.05 | 0.01 | 0.01 | 0     | 0    | 0.02  | 0.03 | 0.04  | 0.04 |
| 6                 | 0.94 | 0.05 | 0.01 | 0.02 | 0     | 0    | 0.01  | 0.02 | 0.04  | 0.04 |
| 7                 | 0.94 | 0.05 | 0.01 | 0.02 | 0     | 0    | 0.01  | 0.02 | 0.04  | 0.04 |
| 8                 | 0.95 | 0.05 | 0.01 | 0.02 | 0     | 0    | 0.01  | 0.02 | 0.03  | 0.04 |
| 9                 | 0.95 | 0.05 | 0.01 | 0.02 | 0     | 0    | 0.01  | 0.03 | 0.03  | 0.04 |
| 10                | 0.96 | 0.04 | 0.01 | 0.01 | 0     | 0    | 0.01  | 0.03 | 0.02  | 0.03 |
| 11                | 0.95 | 0.05 | 0.01 | 0.02 | 0     | 0    | 0.01  | 0.03 | 0.02  | 0.03 |
| 12                | 0.95 | 0.05 | 0.01 | 0.02 | 0     | 0    | 0.01  | 0.03 | 0.02  | 0.03 |

**age=50 years, timing allo <6 months, cmv=others, graft=PBSC, In vivo Tcell depletion=yes,**

| Landmark time (y) | GRFS | se   | GF   | se   | AGVHD | se   | CGVHD | se   | Death | se   |
|-------------------|------|------|------|------|-------|------|-------|------|-------|------|
| 0                 | 0.75 | 0.09 | 0.02 | 0.02 | 0.06  | 0.05 | 0.03  | 0.03 | 0.14  | 0.07 |
| 1                 | 0.8  | 0.09 | 0.02 | 0.02 | 0.05  | 0.05 | 0.03  | 0.04 | 0.1   | 0.07 |
| 2                 | 0.85 | 0.09 | 0.01 | 0.01 | 0.01  | 0.03 | 0.04  | 0.04 | 0.09  | 0.07 |
| 3                 | 0.87 | 0.08 | 0.01 | 0.01 | 0     | 0    | 0.04  | 0.04 | 0.08  | 0.07 |
| 4                 | 0.89 | 0.08 | 0.01 | 0.01 | 0     | 0    | 0.03  | 0.04 | 0.07  | 0.07 |

|    |      |      |      |      |   |   |      |      |      |      |
|----|------|------|------|------|---|---|------|------|------|------|
| 5  | 0.9  | 0.08 | 0.01 | 0.01 | 0 | 0 | 0.03 | 0.04 | 0.06 | 0.07 |
| 6  | 0.91 | 0.08 | 0.01 | 0.02 | 0 | 0 | 0.02 | 0.04 | 0.06 | 0.07 |
| 7  | 0.91 | 0.08 | 0.01 | 0.02 | 0 | 0 | 0.02 | 0.03 | 0.06 | 0.07 |
| 8  | 0.93 | 0.07 | 0.01 | 0.02 | 0 | 0 | 0.01 | 0.03 | 0.05 | 0.06 |
| 9  | 0.92 | 0.07 | 0.01 | 0.02 | 0 | 0 | 0.02 | 0.04 | 0.05 | 0.06 |
| 10 | 0.94 | 0.07 | 0.01 | 0.02 | 0 | 0 | 0.02 | 0.04 | 0.03 | 0.05 |
| 11 | 0.93 | 0.07 | 0.01 | 0.03 | 0 | 0 | 0.02 | 0.04 | 0.03 | 0.05 |
| 12 | 0.93 | 0.07 | 0.01 | 0.03 | 0 | 0 | 0.02 | 0.04 | 0.03 | 0.05 |



**Supplementary Table 6:** Predicted probabilities of GRFS and GRFS failures within the next 2 years after landmark time that ranges from 0 to 12 months after Allo-HSCT, in the upfront cohort. Each sub-table correspond to one covariate combination. AGVHD: acute GVHD, CGVHD: Chronic GVHD, GF: graft failure; se: standard error.

**age=10 years, timing allo >6 months, cmv=D-/R-, donor=MRD, graft=BM, TBI=no TBI, In vivo Tcell depletion=no,**

| Landmark time (y) | GRFS | se   | GF   | se   | AGVHD | se   | CGVHD | se   | Death | se   |
|-------------------|------|------|------|------|-------|------|-------|------|-------|------|
| 0                 | 0.84 | 0.06 | 0.03 | 0.03 | 0.03  | 0.02 | 0.02  | 0.02 | 0.08  | 0.04 |
| 1                 | 0.85 | 0.06 | 0.03 | 0.03 | 0.02  | 0.02 | 0.02  | 0.02 | 0.07  | 0.04 |
| 2                 | 0.88 | 0.06 | 0.03 | 0.03 | 0     | 0.01 | 0.03  | 0.02 | 0.07  | 0.04 |
| 3                 | 0.89 | 0.06 | 0.03 | 0.03 | 0     | 0    | 0.03  | 0.03 | 0.06  | 0.04 |
| 4                 | 0.92 | 0.05 | 0.02 | 0.03 | 0     | 0    | 0.02  | 0.03 | 0.04  | 0.04 |
| 5                 | 0.93 | 0.05 | 0.01 | 0.03 | 0     | 0    | 0.02  | 0.03 | 0.03  | 0.04 |
| 6                 | 0.94 | 0.05 | 0.01 | 0.03 | 0     | 0    | 0.02  | 0.02 | 0.03  | 0.04 |
| 7                 | 0.95 | 0.05 | 0.01 | 0.03 | 0     | 0    | 0.01  | 0.02 | 0.03  | 0.03 |
| 8                 | 0.95 | 0.05 | 0.01 | 0.03 | 0     | 0    | 0.01  | 0.02 | 0.03  | 0.03 |
| 9                 | 0.95 | 0.05 | 0.01 | 0.03 | 0     | 0    | 0.01  | 0.02 | 0.03  | 0.03 |
| 10                | 0.96 | 0.05 | 0.01 | 0.03 | 0     | 0    | 0.01  | 0.02 | 0.02  | 0.03 |
| 11                | 0.96 | 0.04 | 0.01 | 0.03 | 0     | 0    | 0.01  | 0.02 | 0.02  | 0.03 |
| 12                | 0.96 | 0.04 | 0.01 | 0.02 | 0     | 0    | 0.01  | 0.02 | 0.02  | 0.03 |

**age=20 years, timing allo >6 months, cmv=D-/R-, donor=MRD, graft=BM, TBI=no TBI, In vivo Tcell depletion=no,**

| Landmark time (y) | GRFS | se   | GF   | se   | AGVHD | se   | CGVHD | se   | Death | se   |
|-------------------|------|------|------|------|-------|------|-------|------|-------|------|
| 0                 | 0.78 | 0.07 | 0.04 | 0.03 | 0.04  | 0.03 | 0.03  | 0.03 | 0.11  | 0.05 |
| 1                 | 0.8  | 0.07 | 0.04 | 0.03 | 0.03  | 0.03 | 0.03  | 0.03 | 0.1   | 0.06 |
| 2                 | 0.83 | 0.07 | 0.03 | 0.03 | 0.01  | 0.02 | 0.04  | 0.03 | 0.1   | 0.06 |
| 3                 | 0.85 | 0.07 | 0.03 | 0.03 | 0     | 0    | 0.04  | 0.03 | 0.08  | 0.06 |
| 4                 | 0.89 | 0.07 | 0.02 | 0.03 | 0     | 0    | 0.03  | 0.03 | 0.06  | 0.05 |
| 5                 | 0.9  | 0.07 | 0.02 | 0.03 | 0     | 0    | 0.03  | 0.03 | 0.05  | 0.05 |
| 6                 | 0.92 | 0.06 | 0.01 | 0.03 | 0     | 0    | 0.02  | 0.03 | 0.04  | 0.05 |
| 7                 | 0.93 | 0.06 | 0.01 | 0.03 | 0     | 0    | 0.01  | 0.03 | 0.04  | 0.05 |
| 8                 | 0.94 | 0.06 | 0.01 | 0.03 | 0     | 0    | 0.01  | 0.03 | 0.04  | 0.05 |
| 9                 | 0.93 | 0.06 | 0.01 | 0.03 | 0     | 0    | 0.01  | 0.03 | 0.04  | 0.05 |
| 10                | 0.94 | 0.06 | 0.01 | 0.03 | 0     | 0    | 0.01  | 0.02 | 0.03  | 0.04 |
| 11                | 0.95 | 0.06 | 0.01 | 0.03 | 0     | 0    | 0.01  | 0.02 | 0.03  | 0.04 |
| 12                | 0.95 | 0.06 | 0.01 | 0.03 | 0     | 0    | 0.01  | 0.02 | 0.03  | 0.04 |

**age=30 years, timing allo >6 months, cmv=D-/R-, donor=MRD, graft=BM, TBI=no TBI, In vivo Tcell depletion=no,**

| Landmark time (y) | GRFS | se   | GF   | se   | AGVHD | se   | CGVHD | se   | Death | se   |
|-------------------|------|------|------|------|-------|------|-------|------|-------|------|
| 0                 | 0.71 | 0.09 | 0.04 | 0.03 | 0.05  | 0.04 | 0.04  | 0.04 | 0.16  | 0.07 |
| 1                 | 0.74 | 0.09 | 0.04 | 0.03 | 0.04  | 0.04 | 0.05  | 0.04 | 0.14  | 0.07 |
| 2                 | 0.77 | 0.09 | 0.03 | 0.03 | 0.01  | 0.02 | 0.05  | 0.04 | 0.13  | 0.08 |
| 3                 | 0.8  | 0.09 | 0.03 | 0.04 | 0     | 0    | 0.05  | 0.05 | 0.12  | 0.08 |
| 4                 | 0.85 | 0.09 | 0.02 | 0.03 | 0     | 0    | 0.05  | 0.05 | 0.09  | 0.07 |

|    |      |      |      |      |   |   |      |      |      |      |
|----|------|------|------|------|---|---|------|------|------|------|
| 5  | 0.87 | 0.09 | 0.02 | 0.03 | 0 | 0 | 0.05 | 0.05 | 0.07 | 0.07 |
| 6  | 0.89 | 0.08 | 0.01 | 0.03 | 0 | 0 | 0.03 | 0.04 | 0.06 | 0.07 |
| 7  | 0.91 | 0.08 | 0.02 | 0.03 | 0 | 0 | 0.02 | 0.04 | 0.06 | 0.06 |
| 8  | 0.91 | 0.08 | 0.02 | 0.03 | 0 | 0 | 0.02 | 0.04 | 0.05 | 0.06 |
| 9  | 0.91 | 0.08 | 0.02 | 0.03 | 0 | 0 | 0.02 | 0.04 | 0.05 | 0.06 |
| 10 | 0.92 | 0.07 | 0.01 | 0.03 | 0 | 0 | 0.02 | 0.03 | 0.05 | 0.06 |
| 11 | 0.93 | 0.07 | 0.01 | 0.03 | 0 | 0 | 0.02 | 0.03 | 0.04 | 0.06 |
| 12 | 0.93 | 0.07 | 0.01 | 0.03 | 0 | 0 | 0.02 | 0.03 | 0.04 | 0.06 |

**age=40 years, timing allo >6 months, cmv=D-/R-, donor=MRD, graft=BM, TBI=no TBI, In vivo Tcell depletion=no,**

| Landmark time (y) | GRFS | se   | GF   | se   | AGVHD | se   | CGVHD | se   | Death | se   |
|-------------------|------|------|------|------|-------|------|-------|------|-------|------|
| 0                 | 0.62 | 0.11 | 0.04 | 0.03 | 0.07  | 0.06 | 0.06  | 0.05 | 0.21  | 0.09 |
| 1                 | 0.65 | 0.11 | 0.04 | 0.04 | 0.06  | 0.06 | 0.06  | 0.05 | 0.19  | 0.09 |
| 2                 | 0.7  | 0.12 | 0.03 | 0.04 | 0.01  | 0.03 | 0.07  | 0.06 | 0.19  | 0.1  |
| 3                 | 0.73 | 0.12 | 0.03 | 0.04 | 0     | 0    | 0.07  | 0.06 | 0.16  | 0.1  |
| 4                 | 0.79 | 0.12 | 0.02 | 0.03 | 0     | 0    | 0.07  | 0.07 | 0.12  | 0.1  |
| 5                 | 0.82 | 0.11 | 0.02 | 0.03 | 0     | 0    | 0.07  | 0.07 | 0.1   | 0.09 |
| 6                 | 0.85 | 0.11 | 0.02 | 0.03 | 0     | 0    | 0.05  | 0.06 | 0.09  | 0.09 |
| 7                 | 0.87 | 0.11 | 0.02 | 0.03 | 0     | 0    | 0.03  | 0.05 | 0.08  | 0.09 |
| 8                 | 0.88 | 0.1  | 0.02 | 0.03 | 0     | 0    | 0.03  | 0.05 | 0.07  | 0.09 |
| 9                 | 0.88 | 0.11 | 0.02 | 0.03 | 0     | 0    | 0.03  | 0.06 | 0.08  | 0.09 |
| 10                | 0.89 | 0.1  | 0.02 | 0.03 | 0     | 0    | 0.02  | 0.05 | 0.07  | 0.09 |
| 11                | 0.9  | 0.1  | 0.02 | 0.03 | 0     | 0    | 0.02  | 0.05 | 0.06  | 0.08 |
| 12                | 0.9  | 0.1  | 0.01 | 0.03 | 0     | 0    | 0.02  | 0.05 | 0.06  | 0.09 |

**age=50 years, timing allo >6 months, cmv=D-/R-, donor=MRD, graft=BM, TBI=no TBI, In vivo Tcell depletion=no,**

| Landmark time (y) | GRFS | se   | GF   | se   | AGVHD | se   | CGVHD | se   | Death | se   |
|-------------------|------|------|------|------|-------|------|-------|------|-------|------|
| 0                 | 0.51 | 0.13 | 0.04 | 0.03 | 0.1   | 0.08 | 0.08  | 0.06 | 0.28  | 0.12 |
| 1                 | 0.55 | 0.14 | 0.04 | 0.04 | 0.08  | 0.08 | 0.08  | 0.07 | 0.25  | 0.12 |
| 2                 | 0.6  | 0.15 | 0.03 | 0.04 | 0.01  | 0.05 | 0.1   | 0.08 | 0.25  | 0.14 |
| 3                 | 0.64 | 0.15 | 0.04 | 0.04 | 0     | 0    | 0.1   | 0.09 | 0.23  | 0.14 |
| 4                 | 0.71 | 0.16 | 0.02 | 0.04 | 0     | 0    | 0.09  | 0.1  | 0.17  | 0.14 |
| 5                 | 0.75 | 0.16 | 0.02 | 0.04 | 0     | 0    | 0.1   | 0.1  | 0.14  | 0.13 |
| 6                 | 0.79 | 0.15 | 0.02 | 0.04 | 0     | 0    | 0.07  | 0.1  | 0.12  | 0.13 |
| 7                 | 0.82 | 0.15 | 0.02 | 0.04 | 0     | 0    | 0.04  | 0.08 | 0.12  | 0.13 |
| 8                 | 0.83 | 0.15 | 0.02 | 0.04 | 0     | 0    | 0.04  | 0.08 | 0.11  | 0.12 |
| 9                 | 0.83 | 0.15 | 0.02 | 0.04 | 0     | 0    | 0.04  | 0.08 | 0.11  | 0.13 |
| 10                | 0.85 | 0.14 | 0.02 | 0.04 | 0     | 0    | 0.03  | 0.07 | 0.1   | 0.13 |
| 11                | 0.86 | 0.14 | 0.02 | 0.04 | 0     | 0    | 0.03  | 0.08 | 0.09  | 0.12 |
| 12                | 0.86 | 0.14 | 0.01 | 0.03 | 0     | 0    | 0.03  | 0.08 | 0.09  | 0.12 |

**age=10 years, timing allo <6 months, cmv=D-/R-, donor=MRD, graft=BM, TBI=no TBI, In vivo Tcell depletion=no,**

| Landmark time (y) | GRFS | se   | GF   | se   | AGVHD | se   | CGVHD | se   | Death | se   |
|-------------------|------|------|------|------|-------|------|-------|------|-------|------|
| 0                 | 0.8  | 0.07 | 0.03 | 0.02 | 0.05  | 0.04 | 0.05  | 0.04 | 0.07  | 0.04 |

|    |      |      |      |      |      |      |      |      |      |      |
|----|------|------|------|------|------|------|------|------|------|------|
| 1  | 0.82 | 0.07 | 0.03 | 0.03 | 0.04 | 0.04 | 0.05 | 0.04 | 0.06 | 0.04 |
| 2  | 0.85 | 0.07 | 0.02 | 0.03 | 0.01 | 0.02 | 0.06 | 0.05 | 0.06 | 0.04 |
| 3  | 0.87 | 0.06 | 0.02 | 0.03 | 0    | 0    | 0.06 | 0.05 | 0.05 | 0.04 |
| 4  | 0.9  | 0.06 | 0.02 | 0.02 | 0    | 0    | 0.05 | 0.05 | 0.04 | 0.03 |
| 5  | 0.91 | 0.06 | 0.01 | 0.02 | 0    | 0    | 0.05 | 0.05 | 0.03 | 0.03 |
| 6  | 0.93 | 0.06 | 0.01 | 0.02 | 0    | 0    | 0.04 | 0.05 | 0.03 | 0.03 |
| 7  | 0.94 | 0.05 | 0.01 | 0.02 | 0    | 0    | 0.02 | 0.04 | 0.02 | 0.03 |
| 8  | 0.95 | 0.05 | 0.01 | 0.02 | 0    | 0    | 0.02 | 0.04 | 0.02 | 0.03 |
| 9  | 0.94 | 0.05 | 0.01 | 0.02 | 0    | 0    | 0.02 | 0.04 | 0.02 | 0.03 |
| 10 | 0.95 | 0.05 | 0.01 | 0.02 | 0    | 0    | 0.02 | 0.04 | 0.02 | 0.03 |
| 11 | 0.95 | 0.05 | 0.01 | 0.02 | 0    | 0    | 0.02 | 0.04 | 0.02 | 0.03 |
| 12 | 0.96 | 0.05 | 0.01 | 0.02 | 0    | 0    | 0.02 | 0.04 | 0.02 | 0.03 |

**age=20 years, timing allo <6 months, cmv=D-/R-, donor=MRD, graft=BM, TBI=no TBI, In vivo Tcell depletion=no,**

| Landmark time (y) | GRFS | se   | GF   | se   | AGVHD | se   | CGVHD | se   | Death | se   |
|-------------------|------|------|------|------|-------|------|-------|------|-------|------|
| 0                 | 0.73 | 0.09 | 0.03 | 0.03 | 0.07  | 0.06 | 0.07  | 0.06 | 0.09  | 0.05 |
| 1                 | 0.76 | 0.09 | 0.03 | 0.03 | 0.06  | 0.06 | 0.07  | 0.06 | 0.08  | 0.05 |
| 2                 | 0.8  | 0.09 | 0.03 | 0.03 | 0.01  | 0.03 | 0.08  | 0.07 | 0.08  | 0.05 |
| 3                 | 0.82 | 0.08 | 0.03 | 0.03 | 0     | 0    | 0.08  | 0.07 | 0.07  | 0.05 |
| 4                 | 0.86 | 0.08 | 0.02 | 0.02 | 0     | 0    | 0.07  | 0.07 | 0.05  | 0.05 |
| 5                 | 0.87 | 0.08 | 0.01 | 0.02 | 0     | 0    | 0.07  | 0.07 | 0.04  | 0.04 |
| 6                 | 0.9  | 0.08 | 0.01 | 0.02 | 0     | 0    | 0.05  | 0.07 | 0.04  | 0.04 |
| 7                 | 0.92 | 0.07 | 0.01 | 0.02 | 0     | 0    | 0.03  | 0.06 | 0.03  | 0.04 |
| 8                 | 0.92 | 0.07 | 0.01 | 0.02 | 0     | 0    | 0.03  | 0.06 | 0.03  | 0.04 |
| 9                 | 0.92 | 0.07 | 0.01 | 0.02 | 0     | 0    | 0.03  | 0.06 | 0.03  | 0.04 |
| 10                | 0.93 | 0.07 | 0.01 | 0.02 | 0     | 0    | 0.03  | 0.05 | 0.03  | 0.04 |
| 11                | 0.94 | 0.07 | 0.01 | 0.02 | 0     | 0    | 0.03  | 0.05 | 0.03  | 0.04 |
| 12                | 0.94 | 0.07 | 0.01 | 0.02 | 0     | 0    | 0.03  | 0.05 | 0.03  | 0.04 |

**age=30 years, timing allo <6 months, cmv=D-/R-, donor=MRD, graft=BM, TBI=no TBI, In vivo Tcell depletion=no,**

| Landmark time (y) | GRFS | se   | GF   | se   | AGVHD | se   | CGVHD | se   | Death | se   |
|-------------------|------|------|------|------|-------|------|-------|------|-------|------|
| 0                 | 0.65 | 0.11 | 0.03 | 0.03 | 0.1   | 0.08 | 0.09  | 0.08 | 0.13  | 0.06 |
| 1                 | 0.68 | 0.11 | 0.03 | 0.03 | 0.08  | 0.08 | 0.1   | 0.08 | 0.11  | 0.06 |
| 2                 | 0.73 | 0.11 | 0.03 | 0.03 | 0.01  | 0.04 | 0.12  | 0.09 | 0.11  | 0.07 |
| 3                 | 0.76 | 0.11 | 0.03 | 0.03 | 0     | 0    | 0.11  | 0.1  | 0.1   | 0.07 |
| 4                 | 0.81 | 0.11 | 0.02 | 0.03 | 0     | 0    | 0.1   | 0.1  | 0.07  | 0.06 |
| 5                 | 0.82 | 0.11 | 0.01 | 0.03 | 0     | 0    | 0.1   | 0.1  | 0.06  | 0.06 |
| 6                 | 0.86 | 0.11 | 0.01 | 0.02 | 0     | 0    | 0.08  | 0.1  | 0.05  | 0.06 |
| 7                 | 0.89 | 0.1  | 0.01 | 0.03 | 0     | 0    | 0.05  | 0.08 | 0.05  | 0.06 |
| 8                 | 0.89 | 0.1  | 0.01 | 0.03 | 0     | 0    | 0.05  | 0.08 | 0.04  | 0.06 |
| 9                 | 0.89 | 0.1  | 0.01 | 0.03 | 0     | 0    | 0.05  | 0.08 | 0.05  | 0.06 |
| 10                | 0.91 | 0.09 | 0.01 | 0.03 | 0     | 0    | 0.04  | 0.07 | 0.04  | 0.06 |
| 11                | 0.91 | 0.09 | 0.01 | 0.03 | 0     | 0    | 0.04  | 0.08 | 0.04  | 0.05 |
| 12                | 0.91 | 0.09 | 0.01 | 0.02 | 0     | 0    | 0.04  | 0.08 | 0.04  | 0.05 |

**age=40 years, timing allo <6 months, cmv=D-/R-, donor=MRD, graft=BM, TBI=no TBI, In vivo Tcell depletion=no,**

| Landmark time (y) | GRFS | se   | GF   | se   | AGVHD | se   | CGVHD | se   | Death | se   |
|-------------------|------|------|------|------|-------|------|-------|------|-------|------|
| 0                 | 0.54 | 0.14 | 0.03 | 0.03 | 0.13  | 0.11 | 0.12  | 0.1  | 0.17  | 0.08 |
| 1                 | 0.58 | 0.14 | 0.03 | 0.03 | 0.11  | 0.11 | 0.13  | 0.11 | 0.15  | 0.08 |
| 2                 | 0.63 | 0.15 | 0.03 | 0.03 | 0.02  | 0.06 | 0.16  | 0.13 | 0.16  | 0.09 |
| 3                 | 0.67 | 0.15 | 0.03 | 0.03 | 0     | 0    | 0.16  | 0.13 | 0.14  | 0.09 |
| 4                 | 0.73 | 0.16 | 0.02 | 0.03 | 0     | 0    | 0.14  | 0.14 | 0.1   | 0.09 |
| 5                 | 0.75 | 0.16 | 0.02 | 0.03 | 0     | 0    | 0.15  | 0.15 | 0.08  | 0.08 |
| 6                 | 0.8  | 0.16 | 0.01 | 0.03 | 0     | 0    | 0.11  | 0.14 | 0.07  | 0.08 |
| 7                 | 0.85 | 0.15 | 0.02 | 0.03 | 0     | 0    | 0.07  | 0.12 | 0.07  | 0.08 |
| 8                 | 0.85 | 0.14 | 0.02 | 0.03 | 0     | 0    | 0.07  | 0.12 | 0.06  | 0.08 |
| 9                 | 0.85 | 0.15 | 0.02 | 0.03 | 0     | 0    | 0.07  | 0.12 | 0.06  | 0.08 |
| 10                | 0.87 | 0.14 | 0.01 | 0.03 | 0     | 0    | 0.05  | 0.11 | 0.06  | 0.08 |
| 11                | 0.88 | 0.14 | 0.01 | 0.03 | 0     | 0    | 0.05  | 0.11 | 0.05  | 0.08 |
| 12                | 0.88 | 0.14 | 0.01 | 0.03 | 0     | 0    | 0.05  | 0.12 | 0.05  | 0.08 |

**age=50 years, timing allo <6 months, cmv=D-/R-, donor=MRD, graft=BM, TBI=no TBI, In vivo Tcell depletion=no,**

| Landmark time (y) | GRFS | se   | GF   | se   | AGVHD | se   | CGVHD | se   | Death | se   |
|-------------------|------|------|------|------|-------|------|-------|------|-------|------|
| 0                 | 0.42 | 0.16 | 0.03 | 0.03 | 0.18  | 0.15 | 0.15  | 0.13 | 0.22  | 0.11 |
| 1                 | 0.46 | 0.18 | 0.04 | 0.03 | 0.15  | 0.16 | 0.17  | 0.14 | 0.2   | 0.11 |
| 2                 | 0.52 | 0.19 | 0.03 | 0.03 | 0.03  | 0.1  | 0.22  | 0.17 | 0.21  | 0.13 |
| 3                 | 0.56 | 0.2  | 0.03 | 0.04 | 0     | 0    | 0.22  | 0.19 | 0.19  | 0.13 |
| 4                 | 0.64 | 0.22 | 0.02 | 0.03 | 0     | 0    | 0.2   | 0.2  | 0.14  | 0.13 |
| 5                 | 0.67 | 0.22 | 0.02 | 0.03 | 0     | 0    | 0.21  | 0.21 | 0.11  | 0.12 |
| 6                 | 0.73 | 0.23 | 0.02 | 0.03 | 0     | 0    | 0.16  | 0.21 | 0.1   | 0.12 |
| 7                 | 0.79 | 0.21 | 0.02 | 0.03 | 0     | 0    | 0.1   | 0.19 | 0.1   | 0.12 |
| 8                 | 0.8  | 0.21 | 0.02 | 0.03 | 0     | 0    | 0.1   | 0.19 | 0.09  | 0.12 |
| 9                 | 0.79 | 0.21 | 0.02 | 0.03 | 0     | 0    | 0.1   | 0.19 | 0.09  | 0.12 |
| 10                | 0.82 | 0.2  | 0.01 | 0.03 | 0     | 0    | 0.08  | 0.18 | 0.08  | 0.12 |
| 11                | 0.83 | 0.2  | 0.02 | 0.03 | 0     | 0    | 0.08  | 0.18 | 0.07  | 0.11 |
| 12                | 0.83 | 0.2  | 0.01 | 0.03 | 0     | 0    | 0.08  | 0.18 | 0.08  | 0.12 |

**age=10 years, timing allo >6 months, cmv=others, donor=MRD, graft=BM, TBI=no TBI, In vivo Tcell depletion=no,**

| Landmark time (y) | GRFS | se   | GF   | se   | AGVHD | se   | CGVHD | se   | Death | se   |
|-------------------|------|------|------|------|-------|------|-------|------|-------|------|
| 0                 | 0.73 | 0.09 | 0.14 | 0.08 | 0.05  | 0.04 | 0.02  | 0.01 | 0.06  | 0.03 |
| 1                 | 0.75 | 0.09 | 0.13 | 0.08 | 0.04  | 0.04 | 0.02  | 0.02 | 0.05  | 0.03 |
| 2                 | 0.81 | 0.09 | 0.11 | 0.09 | 0.01  | 0.02 | 0.02  | 0.02 | 0.05  | 0.03 |
| 3                 | 0.82 | 0.09 | 0.11 | 0.09 | 0     | 0    | 0.02  | 0.02 | 0.05  | 0.03 |
| 4                 | 0.87 | 0.09 | 0.07 | 0.08 | 0     | 0    | 0.02  | 0.02 | 0.04  | 0.03 |
| 5                 | 0.89 | 0.08 | 0.06 | 0.08 | 0     | 0    | 0.02  | 0.02 | 0.03  | 0.03 |
| 6                 | 0.91 | 0.08 | 0.05 | 0.07 | 0     | 0    | 0.01  | 0.02 | 0.02  | 0.03 |
| 7                 | 0.92 | 0.08 | 0.05 | 0.07 | 0     | 0    | 0.01  | 0.01 | 0.02  | 0.03 |
| 8                 | 0.92 | 0.08 | 0.05 | 0.07 | 0     | 0    | 0.01  | 0.01 | 0.02  | 0.03 |

|    |      |      |      |      |   |   |      |      |      |      |
|----|------|------|------|------|---|---|------|------|------|------|
| 9  | 0.92 | 0.08 | 0.06 | 0.08 | 0 | 0 | 0.01 | 0.01 | 0.02 | 0.03 |
| 10 | 0.93 | 0.08 | 0.05 | 0.07 | 0 | 0 | 0.01 | 0.01 | 0.02 | 0.03 |
| 11 | 0.93 | 0.08 | 0.05 | 0.07 | 0 | 0 | 0.01 | 0.01 | 0.02 | 0.03 |
| 12 | 0.94 | 0.07 | 0.04 | 0.07 | 0 | 0 | 0.01 | 0.01 | 0.02 | 0.03 |

**age=20 years, timing allo >6 months, cmv=others, donor=MRD, graft=BM, TBI=no TBI, In vivo Tcell depletion=no,**

| Landmark time (y) | GRFS | se   | GF   | se   | AGVHD | se   | CGVHD | se   | Death | se   |
|-------------------|------|------|------|------|-------|------|-------|------|-------|------|
| 0                 | 0.67 | 0.09 | 0.15 | 0.08 | 0.07  | 0.04 | 0.02  | 0.02 | 0.09  | 0.04 |
| 1                 | 0.7  | 0.09 | 0.15 | 0.08 | 0.06  | 0.04 | 0.02  | 0.02 | 0.08  | 0.04 |
| 2                 | 0.76 | 0.09 | 0.12 | 0.08 | 0.01  | 0.02 | 0.03  | 0.02 | 0.08  | 0.04 |
| 3                 | 0.78 | 0.09 | 0.13 | 0.09 | 0     | 0    | 0.03  | 0.02 | 0.07  | 0.04 |
| 4                 | 0.84 | 0.09 | 0.08 | 0.08 | 0     | 0    | 0.02  | 0.02 | 0.05  | 0.04 |
| 5                 | 0.87 | 0.08 | 0.07 | 0.07 | 0     | 0    | 0.03  | 0.02 | 0.04  | 0.04 |
| 6                 | 0.89 | 0.08 | 0.06 | 0.07 | 0     | 0    | 0.02  | 0.02 | 0.04  | 0.04 |
| 7                 | 0.9  | 0.08 | 0.06 | 0.07 | 0     | 0    | 0.01  | 0.02 | 0.03  | 0.04 |
| 8                 | 0.9  | 0.08 | 0.06 | 0.07 | 0     | 0    | 0.01  | 0.02 | 0.03  | 0.03 |
| 9                 | 0.9  | 0.08 | 0.06 | 0.08 | 0     | 0    | 0.01  | 0.02 | 0.03  | 0.04 |
| 10                | 0.91 | 0.08 | 0.05 | 0.07 | 0     | 0    | 0.01  | 0.02 | 0.03  | 0.03 |
| 11                | 0.91 | 0.08 | 0.05 | 0.07 | 0     | 0    | 0.01  | 0.02 | 0.02  | 0.03 |
| 12                | 0.92 | 0.08 | 0.04 | 0.07 | 0     | 0    | 0.01  | 0.02 | 0.03  | 0.03 |

**age=30 years, timing allo >6 months, cmv=others, donor=MRD, graft=BM, TBI=no TBI, In vivo Tcell depletion=no,**

| Landmark time (y) | GRFS | se   | GF   | se   | AGVHD | se   | CGVHD | se   | Death | se   |
|-------------------|------|------|------|------|-------|------|-------|------|-------|------|
| 0                 | 0.6  | 0.09 | 0.16 | 0.07 | 0.1   | 0.05 | 0.03  | 0.02 | 0.12  | 0.05 |
| 1                 | 0.63 | 0.09 | 0.16 | 0.08 | 0.08  | 0.05 | 0.03  | 0.02 | 0.1   | 0.05 |
| 2                 | 0.71 | 0.1  | 0.13 | 0.08 | 0.01  | 0.03 | 0.04  | 0.03 | 0.11  | 0.06 |
| 3                 | 0.73 | 0.1  | 0.14 | 0.09 | 0     | 0    | 0.04  | 0.03 | 0.09  | 0.06 |
| 4                 | 0.8  | 0.1  | 0.09 | 0.08 | 0     | 0    | 0.04  | 0.03 | 0.07  | 0.05 |
| 5                 | 0.83 | 0.09 | 0.07 | 0.08 | 0     | 0    | 0.04  | 0.03 | 0.06  | 0.05 |
| 6                 | 0.86 | 0.09 | 0.07 | 0.07 | 0     | 0    | 0.03  | 0.03 | 0.05  | 0.05 |
| 7                 | 0.87 | 0.09 | 0.07 | 0.07 | 0     | 0    | 0.02  | 0.03 | 0.05  | 0.05 |
| 8                 | 0.88 | 0.09 | 0.07 | 0.07 | 0     | 0    | 0.02  | 0.03 | 0.04  | 0.05 |
| 9                 | 0.87 | 0.09 | 0.07 | 0.08 | 0     | 0    | 0.02  | 0.03 | 0.04  | 0.05 |
| 10                | 0.89 | 0.09 | 0.06 | 0.08 | 0     | 0    | 0.01  | 0.02 | 0.04  | 0.05 |
| 11                | 0.89 | 0.09 | 0.06 | 0.08 | 0     | 0    | 0.01  | 0.02 | 0.04  | 0.04 |
| 12                | 0.9  | 0.08 | 0.05 | 0.07 | 0     | 0    | 0.01  | 0.02 | 0.04  | 0.05 |

**age=40 years, timing allo >6 months, cmv=others, donor=MRD, graft=BM, TBI=no TBI, In vivo Tcell depletion=no,**

| Landmark time (y) | GRFS | se   | GF   | se   | AGVHD | se   | CGVHD | se   | Death | se   |
|-------------------|------|------|------|------|-------|------|-------|------|-------|------|
| 0                 | 0.51 | 0.09 | 0.16 | 0.07 | 0.13  | 0.07 | 0.04  | 0.03 | 0.16  | 0.06 |
| 1                 | 0.55 | 0.1  | 0.16 | 0.08 | 0.1   | 0.07 | 0.04  | 0.03 | 0.14  | 0.06 |
| 2                 | 0.63 | 0.11 | 0.14 | 0.08 | 0.02  | 0.04 | 0.06  | 0.04 | 0.15  | 0.07 |
| 3                 | 0.67 | 0.11 | 0.15 | 0.09 | 0     | 0    | 0.05  | 0.04 | 0.13  | 0.07 |
| 4                 | 0.75 | 0.11 | 0.1  | 0.08 | 0     | 0    | 0.05  | 0.04 | 0.1   | 0.07 |

|    |      |      |      |      |   |   |      |      |      |      |
|----|------|------|------|------|---|---|------|------|------|------|
| 5  | 0.79 | 0.11 | 0.08 | 0.08 | 0 | 0 | 0.05 | 0.04 | 0.08 | 0.07 |
| 6  | 0.82 | 0.1  | 0.07 | 0.08 | 0 | 0 | 0.04 | 0.04 | 0.07 | 0.07 |
| 7  | 0.84 | 0.1  | 0.07 | 0.08 | 0 | 0 | 0.02 | 0.03 | 0.07 | 0.06 |
| 8  | 0.84 | 0.1  | 0.07 | 0.08 | 0 | 0 | 0.02 | 0.04 | 0.06 | 0.06 |
| 9  | 0.84 | 0.11 | 0.08 | 0.08 | 0 | 0 | 0.02 | 0.04 | 0.06 | 0.06 |
| 10 | 0.86 | 0.1  | 0.07 | 0.08 | 0 | 0 | 0.02 | 0.03 | 0.06 | 0.06 |
| 11 | 0.87 | 0.1  | 0.07 | 0.08 | 0 | 0 | 0.02 | 0.03 | 0.05 | 0.06 |
| 12 | 0.87 | 0.1  | 0.05 | 0.08 | 0 | 0 | 0.02 | 0.03 | 0.05 | 0.06 |

**age=50 years, timing allo >6 months, cmv=others, donor=MRD, graft=BM, TBI=no TBI, In vivo Tcell depletion=no,**

| Landmark time (y) | GRFS | se   | GF   | se   | AGVHD | se   | CGVHD | se   | Death | se   |
|-------------------|------|------|------|------|-------|------|-------|------|-------|------|
| 0                 | 0.41 | 0.1  | 0.16 | 0.07 | 0.17  | 0.09 | 0.05  | 0.04 | 0.21  | 0.07 |
| 1                 | 0.45 | 0.11 | 0.17 | 0.08 | 0.14  | 0.09 | 0.06  | 0.04 | 0.18  | 0.08 |
| 2                 | 0.55 | 0.12 | 0.15 | 0.09 | 0.03  | 0.06 | 0.08  | 0.05 | 0.2   | 0.09 |
| 3                 | 0.59 | 0.13 | 0.16 | 0.1  | 0     | 0    | 0.07  | 0.05 | 0.18  | 0.1  |
| 4                 | 0.68 | 0.13 | 0.11 | 0.09 | 0     | 0    | 0.07  | 0.06 | 0.14  | 0.1  |
| 5                 | 0.73 | 0.13 | 0.09 | 0.09 | 0     | 0    | 0.08  | 0.06 | 0.11  | 0.09 |
| 6                 | 0.77 | 0.13 | 0.08 | 0.09 | 0     | 0    | 0.06  | 0.06 | 0.1   | 0.09 |
| 7                 | 0.79 | 0.13 | 0.08 | 0.09 | 0     | 0    | 0.03  | 0.05 | 0.09  | 0.09 |
| 8                 | 0.8  | 0.13 | 0.08 | 0.09 | 0     | 0    | 0.03  | 0.05 | 0.09  | 0.09 |
| 9                 | 0.79 | 0.13 | 0.08 | 0.1  | 0     | 0    | 0.03  | 0.05 | 0.09  | 0.09 |
| 10                | 0.82 | 0.13 | 0.07 | 0.09 | 0     | 0    | 0.03  | 0.05 | 0.08  | 0.09 |
| 11                | 0.83 | 0.13 | 0.07 | 0.09 | 0     | 0    | 0.03  | 0.05 | 0.07  | 0.08 |
| 12                | 0.84 | 0.13 | 0.06 | 0.09 | 0     | 0    | 0.03  | 0.05 | 0.07  | 0.09 |

**age=10 years, timing allo <6 months, cmv=others, donor=MRD, graft=BM, TBI=no TBI, In vivo Tcell depletion=no,**

| Landmark time (y) | GRFS | se   | GF   | se   | AGVHD | se   | CGVHD | se   | Death | se   |
|-------------------|------|------|------|------|-------|------|-------|------|-------|------|
| 0                 | 0.7  | 0.07 | 0.12 | 0.05 | 0.09  | 0.05 | 0.04  | 0.03 | 0.05  | 0.03 |
| 1                 | 0.72 | 0.07 | 0.12 | 0.05 | 0.07  | 0.05 | 0.04  | 0.03 | 0.05  | 0.03 |
| 2                 | 0.79 | 0.07 | 0.1  | 0.06 | 0.01  | 0.03 | 0.05  | 0.03 | 0.05  | 0.03 |
| 3                 | 0.81 | 0.07 | 0.1  | 0.06 | 0     | 0    | 0.04  | 0.03 | 0.04  | 0.03 |
| 4                 | 0.86 | 0.07 | 0.07 | 0.05 | 0     | 0    | 0.04  | 0.03 | 0.03  | 0.03 |
| 5                 | 0.88 | 0.06 | 0.05 | 0.05 | 0     | 0    | 0.04  | 0.03 | 0.02  | 0.02 |
| 6                 | 0.9  | 0.06 | 0.05 | 0.05 | 0     | 0    | 0.03  | 0.03 | 0.02  | 0.02 |
| 7                 | 0.91 | 0.06 | 0.05 | 0.05 | 0     | 0    | 0.02  | 0.03 | 0.02  | 0.02 |
| 8                 | 0.92 | 0.06 | 0.05 | 0.05 | 0     | 0    | 0.02  | 0.03 | 0.02  | 0.02 |
| 9                 | 0.91 | 0.06 | 0.05 | 0.05 | 0     | 0    | 0.02  | 0.03 | 0.02  | 0.02 |
| 10                | 0.93 | 0.06 | 0.04 | 0.05 | 0     | 0    | 0.01  | 0.02 | 0.02  | 0.02 |
| 11                | 0.93 | 0.06 | 0.04 | 0.05 | 0     | 0    | 0.01  | 0.02 | 0.01  | 0.02 |
| 12                | 0.94 | 0.05 | 0.04 | 0.04 | 0     | 0    | 0.01  | 0.02 | 0.02  | 0.02 |

**age=20 years, timing allo <6 months, cmv=others, donor=MRD, graft=BM, TBI=no TBI, In vivo Tcell depletion=no,**

| Landmark time (y) | GRFS | se   | GF   | se   | AGVHD | se   | CGVHD | se   | Death | se   |
|-------------------|------|------|------|------|-------|------|-------|------|-------|------|
| 0                 | 0.62 | 0.08 | 0.13 | 0.05 | 0.13  | 0.06 | 0.05  | 0.03 | 0.07  | 0.03 |

|    |      |      |      |      |      |      |      |      |      |      |
|----|------|------|------|------|------|------|------|------|------|------|
| 1  | 0.66 | 0.08 | 0.13 | 0.05 | 0.1  | 0.06 | 0.05 | 0.03 | 0.06 | 0.03 |
| 2  | 0.74 | 0.08 | 0.11 | 0.06 | 0.02 | 0.03 | 0.06 | 0.04 | 0.07 | 0.04 |
| 3  | 0.77 | 0.08 | 0.11 | 0.06 | 0    | 0    | 0.06 | 0.04 | 0.06 | 0.04 |
| 4  | 0.83 | 0.07 | 0.07 | 0.05 | 0    | 0    | 0.06 | 0.04 | 0.04 | 0.03 |
| 5  | 0.85 | 0.07 | 0.06 | 0.05 | 0    | 0    | 0.06 | 0.04 | 0.03 | 0.03 |
| 6  | 0.87 | 0.07 | 0.05 | 0.05 | 0    | 0    | 0.04 | 0.04 | 0.03 | 0.03 |
| 7  | 0.89 | 0.07 | 0.05 | 0.05 | 0    | 0    | 0.03 | 0.03 | 0.03 | 0.03 |
| 8  | 0.89 | 0.07 | 0.05 | 0.05 | 0    | 0    | 0.03 | 0.04 | 0.03 | 0.03 |
| 9  | 0.89 | 0.07 | 0.06 | 0.05 | 0    | 0    | 0.03 | 0.04 | 0.03 | 0.03 |
| 10 | 0.91 | 0.06 | 0.05 | 0.05 | 0    | 0    | 0.02 | 0.03 | 0.02 | 0.03 |
| 11 | 0.91 | 0.06 | 0.05 | 0.05 | 0    | 0    | 0.02 | 0.03 | 0.02 | 0.03 |
| 12 | 0.92 | 0.06 | 0.04 | 0.05 | 0    | 0    | 0.02 | 0.03 | 0.02 | 0.03 |

**age=30 years, timing allo <6 months, cmv=others, donor=MRD, graft=BM, TBI=no TBI, In vivo Tcell depletion=no,**

| Landmark time (y) | GRFS | se   | GF   | se   | AGVHD | se   | CGVHD | se   | Death | se   |
|-------------------|------|------|------|------|-------|------|-------|------|-------|------|
| 0                 | 0.53 | 0.09 | 0.13 | 0.05 | 0.17  | 0.08 | 0.06  | 0.04 | 0.09  | 0.04 |
| 1                 | 0.57 | 0.09 | 0.13 | 0.06 | 0.14  | 0.08 | 0.07  | 0.04 | 0.08  | 0.04 |
| 2                 | 0.67 | 0.09 | 0.12 | 0.06 | 0.03  | 0.05 | 0.09  | 0.05 | 0.09  | 0.05 |
| 3                 | 0.71 | 0.09 | 0.12 | 0.06 | 0     | 0    | 0.09  | 0.06 | 0.08  | 0.05 |
| 4                 | 0.78 | 0.09 | 0.08 | 0.06 | 0     | 0    | 0.08  | 0.06 | 0.06  | 0.05 |
| 5                 | 0.8  | 0.09 | 0.07 | 0.06 | 0     | 0    | 0.08  | 0.06 | 0.05  | 0.04 |
| 6                 | 0.84 | 0.09 | 0.06 | 0.05 | 0     | 0    | 0.06  | 0.06 | 0.04  | 0.04 |
| 7                 | 0.86 | 0.08 | 0.06 | 0.06 | 0     | 0    | 0.04  | 0.05 | 0.04  | 0.04 |
| 8                 | 0.87 | 0.08 | 0.06 | 0.06 | 0     | 0    | 0.04  | 0.05 | 0.04  | 0.04 |
| 9                 | 0.86 | 0.08 | 0.06 | 0.06 | 0     | 0    | 0.04  | 0.05 | 0.04  | 0.04 |
| 10                | 0.88 | 0.08 | 0.05 | 0.06 | 0     | 0    | 0.03  | 0.05 | 0.03  | 0.04 |
| 11                | 0.89 | 0.08 | 0.05 | 0.06 | 0     | 0    | 0.03  | 0.05 | 0.03  | 0.04 |
| 12                | 0.89 | 0.08 | 0.04 | 0.05 | 0     | 0    | 0.03  | 0.05 | 0.03  | 0.04 |

**age=40 years, timing allo <6 months, cmv=others, donor=MRD, graft=BM, TBI=no TBI, In vivo Tcell depletion=no,**

| Landmark time (y) | GRFS | se   | GF   | se   | AGVHD | se   | CGVHD | se   | Death | se   |
|-------------------|------|------|------|------|-------|------|-------|------|-------|------|
| 0                 | 0.43 | 0.1  | 0.13 | 0.06 | 0.23  | 0.11 | 0.08  | 0.05 | 0.12  | 0.05 |
| 1                 | 0.47 | 0.11 | 0.14 | 0.06 | 0.19  | 0.11 | 0.09  | 0.06 | 0.11  | 0.05 |
| 2                 | 0.59 | 0.11 | 0.13 | 0.07 | 0.04  | 0.07 | 0.12  | 0.08 | 0.12  | 0.07 |
| 3                 | 0.63 | 0.11 | 0.13 | 0.07 | 0     | 0    | 0.12  | 0.08 | 0.11  | 0.07 |
| 4                 | 0.71 | 0.12 | 0.09 | 0.07 | 0     | 0    | 0.11  | 0.09 | 0.08  | 0.06 |
| 5                 | 0.74 | 0.12 | 0.07 | 0.07 | 0     | 0    | 0.12  | 0.09 | 0.07  | 0.06 |
| 6                 | 0.79 | 0.11 | 0.06 | 0.07 | 0     | 0    | 0.09  | 0.09 | 0.06  | 0.06 |
| 7                 | 0.82 | 0.11 | 0.07 | 0.07 | 0     | 0    | 0.05  | 0.07 | 0.06  | 0.06 |
| 8                 | 0.83 | 0.11 | 0.07 | 0.07 | 0     | 0    | 0.05  | 0.07 | 0.05  | 0.06 |
| 9                 | 0.82 | 0.11 | 0.07 | 0.07 | 0     | 0    | 0.05  | 0.07 | 0.05  | 0.06 |
| 10                | 0.85 | 0.11 | 0.06 | 0.07 | 0     | 0    | 0.04  | 0.07 | 0.05  | 0.06 |
| 11                | 0.85 | 0.11 | 0.06 | 0.07 | 0     | 0    | 0.04  | 0.07 | 0.04  | 0.05 |
| 12                | 0.86 | 0.1  | 0.05 | 0.06 | 0     | 0    | 0.04  | 0.07 | 0.04  | 0.06 |

**age=50 years, timing allo <6 months, cmv=others, donor=MRD, graft=BM, TBI=no TBI, In vivo Tcell depletion=no,**

| Landmark time (y) | GRFS | se   | GF   | se   | AGVHD | se   | CGVHD | se   | Death | se   |
|-------------------|------|------|------|------|-------|------|-------|------|-------|------|
| 0                 | 0.32 | 0.11 | 0.13 | 0.06 | 0.31  | 0.15 | 0.1   | 0.07 | 0.15  | 0.06 |
| 1                 | 0.36 | 0.13 | 0.13 | 0.07 | 0.26  | 0.16 | 0.11  | 0.08 | 0.14  | 0.07 |
| 2                 | 0.49 | 0.14 | 0.13 | 0.08 | 0.05  | 0.11 | 0.16  | 0.11 | 0.17  | 0.09 |
| 3                 | 0.54 | 0.14 | 0.14 | 0.09 | 0     | 0    | 0.17  | 0.12 | 0.15  | 0.09 |
| 4                 | 0.63 | 0.16 | 0.09 | 0.09 | 0     | 0    | 0.16  | 0.13 | 0.12  | 0.09 |
| 5                 | 0.67 | 0.16 | 0.08 | 0.08 | 0     | 0    | 0.17  | 0.14 | 0.09  | 0.09 |
| 6                 | 0.72 | 0.16 | 0.07 | 0.08 | 0     | 0    | 0.12  | 0.13 | 0.08  | 0.09 |
| 7                 | 0.77 | 0.15 | 0.07 | 0.09 | 0     | 0    | 0.07  | 0.11 | 0.08  | 0.09 |
| 8                 | 0.78 | 0.15 | 0.07 | 0.09 | 0     | 0    | 0.07  | 0.12 | 0.07  | 0.08 |
| 9                 | 0.77 | 0.16 | 0.08 | 0.09 | 0     | 0    | 0.08  | 0.12 | 0.07  | 0.09 |
| 10                | 0.81 | 0.15 | 0.07 | 0.09 | 0     | 0    | 0.06  | 0.11 | 0.07  | 0.08 |
| 11                | 0.81 | 0.15 | 0.07 | 0.09 | 0     | 0    | 0.06  | 0.11 | 0.06  | 0.08 |
| 12                | 0.82 | 0.15 | 0.05 | 0.08 | 0     | 0    | 0.06  | 0.11 | 0.06  | 0.08 |

**age=10 years, timing allo >6 months, cmv=D-/R-, donor=UD, graft=BM, TBI=no TBI, In vivo Tcell depletion=no,**

| Landmark time (y) | GRFS | se   | GF   | se   | AGVHD | se   | CGVHD | se   | Death | se   |
|-------------------|------|------|------|------|-------|------|-------|------|-------|------|
| 0                 | 0.64 | 0.15 | 0.02 | 0.02 | 0.19  | 0.16 | 0.02  | 0.02 | 0.12  | 0.07 |
| 1                 | 0.69 | 0.15 | 0.02 | 0.02 | 0.15  | 0.16 | 0.02  | 0.02 | 0.11  | 0.07 |
| 2                 | 0.8  | 0.12 | 0.02 | 0.03 | 0.03  | 0.1  | 0.03  | 0.03 | 0.12  | 0.08 |
| 3                 | 0.84 | 0.09 | 0.02 | 0.03 | 0     | 0    | 0.03  | 0.03 | 0.11  | 0.08 |
| 4                 | 0.88 | 0.08 | 0.01 | 0.02 | 0     | 0    | 0.02  | 0.03 | 0.08  | 0.07 |
| 5                 | 0.9  | 0.08 | 0.01 | 0.02 | 0     | 0    | 0.02  | 0.03 | 0.06  | 0.07 |
| 6                 | 0.92 | 0.07 | 0.01 | 0.02 | 0     | 0    | 0.02  | 0.03 | 0.06  | 0.07 |
| 7                 | 0.93 | 0.07 | 0.01 | 0.02 | 0     | 0    | 0.01  | 0.02 | 0.05  | 0.07 |
| 8                 | 0.93 | 0.07 | 0.01 | 0.02 | 0     | 0    | 0.01  | 0.02 | 0.05  | 0.06 |
| 9                 | 0.93 | 0.07 | 0.01 | 0.02 | 0     | 0    | 0.01  | 0.02 | 0.05  | 0.06 |
| 10                | 0.94 | 0.07 | 0.01 | 0.02 | 0     | 0    | 0.01  | 0.02 | 0.04  | 0.06 |
| 11                | 0.94 | 0.07 | 0.01 | 0.02 | 0     | 0    | 0.01  | 0.02 | 0.04  | 0.06 |
| 12                | 0.94 | 0.07 | 0.01 | 0.02 | 0     | 0    | 0.01  | 0.02 | 0.04  | 0.06 |

**age=20 years, timing allo >6 months, cmv=D-/R-, donor=UD, graft=BM, TBI=no TBI, In vivo Tcell depletion=no,**

| Landmark time (y) | GRFS | se   | GF   | se   | AGVHD | se   | CGVHD | se   | Death | se   |
|-------------------|------|------|------|------|-------|------|-------|------|-------|------|
| 0                 | 0.54 | 0.16 | 0.02 | 0.02 | 0.25  | 0.19 | 0.02  | 0.02 | 0.16  | 0.08 |
| 1                 | 0.59 | 0.17 | 0.02 | 0.02 | 0.21  | 0.2  | 0.03  | 0.03 | 0.15  | 0.09 |
| 2                 | 0.73 | 0.14 | 0.02 | 0.03 | 0.04  | 0.13 | 0.04  | 0.04 | 0.17  | 0.1  |
| 3                 | 0.79 | 0.11 | 0.02 | 0.03 | 0     | 0    | 0.04  | 0.04 | 0.15  | 0.1  |
| 4                 | 0.84 | 0.11 | 0.02 | 0.03 | 0     | 0    | 0.03  | 0.04 | 0.11  | 0.1  |
| 5                 | 0.86 | 0.1  | 0.01 | 0.02 | 0     | 0    | 0.03  | 0.04 | 0.09  | 0.09 |
| 6                 | 0.88 | 0.1  | 0.01 | 0.02 | 0     | 0    | 0.02  | 0.04 | 0.08  | 0.09 |
| 7                 | 0.9  | 0.09 | 0.01 | 0.02 | 0     | 0    | 0.01  | 0.03 | 0.07  | 0.09 |
| 8                 | 0.91 | 0.09 | 0.01 | 0.02 | 0     | 0    | 0.01  | 0.03 | 0.07  | 0.09 |



|    |      |      |      |      |   |   |      |      |      |      |
|----|------|------|------|------|---|---|------|------|------|------|
| 9  | 0.9  | 0.09 | 0.01 | 0.03 | 0 | 0 | 0.02 | 0.03 | 0.07 | 0.09 |
| 10 | 0.92 | 0.09 | 0.01 | 0.02 | 0 | 0 | 0.01 | 0.03 | 0.06 | 0.08 |
| 11 | 0.92 | 0.09 | 0.01 | 0.02 | 0 | 0 | 0.01 | 0.03 | 0.06 | 0.08 |
| 12 | 0.92 | 0.09 | 0.01 | 0.02 | 0 | 0 | 0.01 | 0.03 | 0.06 | 0.08 |

**age=30 years, timing allo >6 months, cmv=D-/R-, donor=UD, graft=BM, TBI=no TBI, In vivo Tcell depletion=no,**

| Landmark time (y) | GRFS | se   | GF   | se   | AGVHD | se   | CGVHD | se   | Death | se   |
|-------------------|------|------|------|------|-------|------|-------|------|-------|------|
| 0                 | 0.41 | 0.17 | 0.02 | 0.02 | 0.33  | 0.22 | 0.03  | 0.03 | 0.2   | 0.1  |
| 1                 | 0.48 | 0.19 | 0.02 | 0.02 | 0.28  | 0.25 | 0.03  | 0.03 | 0.18  | 0.11 |
| 2                 | 0.64 | 0.18 | 0.02 | 0.03 | 0.06  | 0.17 | 0.05  | 0.05 | 0.23  | 0.13 |
| 3                 | 0.71 | 0.14 | 0.03 | 0.03 | 0     | 0    | 0.05  | 0.05 | 0.21  | 0.14 |
| 4                 | 0.78 | 0.14 | 0.02 | 0.03 | 0     | 0    | 0.05  | 0.05 | 0.16  | 0.13 |
| 5                 | 0.81 | 0.13 | 0.01 | 0.03 | 0     | 0    | 0.05  | 0.06 | 0.13  | 0.13 |
| 6                 | 0.84 | 0.13 | 0.01 | 0.03 | 0     | 0    | 0.04  | 0.05 | 0.11  | 0.12 |
| 7                 | 0.86 | 0.13 | 0.01 | 0.03 | 0     | 0    | 0.02  | 0.04 | 0.11  | 0.12 |
| 8                 | 0.87 | 0.12 | 0.01 | 0.03 | 0     | 0    | 0.02  | 0.04 | 0.1   | 0.12 |
| 9                 | 0.87 | 0.13 | 0.01 | 0.03 | 0     | 0    | 0.02  | 0.04 | 0.1   | 0.12 |
| 10                | 0.88 | 0.12 | 0.01 | 0.03 | 0     | 0    | 0.02  | 0.04 | 0.09  | 0.12 |
| 11                | 0.89 | 0.12 | 0.01 | 0.03 | 0     | 0    | 0.02  | 0.04 | 0.08  | 0.11 |
| 12                | 0.89 | 0.12 | 0.01 | 0.02 | 0     | 0    | 0.02  | 0.04 | 0.08  | 0.12 |

**age=40 years, timing allo >6 months, cmv=D-/R-, donor=UD, graft=BM, TBI=no TBI, In vivo Tcell depletion=no,**

| Landmark time (y) | GRFS | se   | GF   | se   | AGVHD | se   | CGVHD | se   | Death | se   |
|-------------------|------|------|------|------|-------|------|-------|------|-------|------|
| 0                 | 0.29 | 0.17 | 0.02 | 0.02 | 0.42  | 0.26 | 0.03  | 0.03 | 0.24  | 0.12 |
| 1                 | 0.35 | 0.2  | 0.02 | 0.02 | 0.37  | 0.3  | 0.04  | 0.04 | 0.22  | 0.14 |
| 2                 | 0.53 | 0.21 | 0.02 | 0.03 | 0.08  | 0.24 | 0.07  | 0.06 | 0.3   | 0.17 |
| 3                 | 0.61 | 0.18 | 0.03 | 0.03 | 0     | 0    | 0.07  | 0.07 | 0.29  | 0.18 |
| 4                 | 0.7  | 0.18 | 0.02 | 0.03 | 0     | 0    | 0.07  | 0.07 | 0.22  | 0.18 |
| 5                 | 0.74 | 0.18 | 0.01 | 0.03 | 0     | 0    | 0.07  | 0.08 | 0.18  | 0.17 |
| 6                 | 0.78 | 0.18 | 0.01 | 0.03 | 0     | 0    | 0.05  | 0.07 | 0.16  | 0.17 |
| 7                 | 0.81 | 0.18 | 0.01 | 0.03 | 0     | 0    | 0.03  | 0.06 | 0.15  | 0.17 |
| 8                 | 0.82 | 0.17 | 0.01 | 0.03 | 0     | 0    | 0.03  | 0.06 | 0.14  | 0.16 |
| 9                 | 0.81 | 0.18 | 0.01 | 0.03 | 0     | 0    | 0.03  | 0.06 | 0.14  | 0.17 |
| 10                | 0.84 | 0.17 | 0.01 | 0.03 | 0     | 0    | 0.02  | 0.06 | 0.13  | 0.16 |
| 11                | 0.85 | 0.17 | 0.01 | 0.03 | 0     | 0    | 0.02  | 0.06 | 0.11  | 0.16 |
| 12                | 0.85 | 0.17 | 0.01 | 0.03 | 0     | 0    | 0.03  | 0.06 | 0.12  | 0.16 |

**age=50 years, timing allo >6 months, cmv=D-/R-, donor=UD, graft=BM, TBI=no TBI, In vivo Tcell depletion=no,**

| Landmark time (y) | GRFS | se   | GF   | se   | AGVHD | se   | CGVHD | se   | Death | se   |
|-------------------|------|------|------|------|-------|------|-------|------|-------|------|
| 0                 | 0.17 | 0.15 | 0.02 | 0.02 | 0.52  | 0.28 | 0.03  | 0.04 | 0.27  | 0.15 |
| 1                 | 0.22 | 0.19 | 0.02 | 0.02 | 0.47  | 0.36 | 0.04  | 0.05 | 0.24  | 0.19 |
| 2                 | 0.4  | 0.24 | 0.02 | 0.03 | 0.11  | 0.34 | 0.08  | 0.08 | 0.38  | 0.23 |
| 3                 | 0.5  | 0.21 | 0.03 | 0.03 | 0     | 0    | 0.09  | 0.09 | 0.38  | 0.22 |
| 4                 | 0.59 | 0.23 | 0.02 | 0.03 | 0     | 0    | 0.09  | 0.1  | 0.3   | 0.23 |

|    |      |      |      |      |   |   |      |      |      |      |
|----|------|------|------|------|---|---|------|------|------|------|
| 5  | 0.65 | 0.24 | 0.02 | 0.03 | 0 | 0 | 0.1  | 0.11 | 0.24 | 0.23 |
| 6  | 0.7  | 0.24 | 0.01 | 0.03 | 0 | 0 | 0.07 | 0.11 | 0.22 | 0.23 |
| 7  | 0.74 | 0.24 | 0.01 | 0.03 | 0 | 0 | 0.04 | 0.09 | 0.21 | 0.23 |
| 8  | 0.75 | 0.24 | 0.02 | 0.03 | 0 | 0 | 0.04 | 0.09 | 0.19 | 0.23 |
| 9  | 0.75 | 0.24 | 0.02 | 0.03 | 0 | 0 | 0.04 | 0.09 | 0.19 | 0.23 |
| 10 | 0.77 | 0.24 | 0.01 | 0.03 | 0 | 0 | 0.03 | 0.09 | 0.18 | 0.23 |
| 11 | 0.79 | 0.23 | 0.01 | 0.03 | 0 | 0 | 0.04 | 0.09 | 0.16 | 0.22 |
| 12 | 0.79 | 0.24 | 0.01 | 0.03 | 0 | 0 | 0.04 | 0.09 | 0.16 | 0.23 |

**age=10 years, timing allo <6 months, cmv=D-/R-, donor=UD, graft=BM, TBI=no TBI, In vivo Tcell depletion=no,**

| Landmark time (y) | GRFS | se   | GF   | se   | AGVHD | se   | CGVHD | se   | Death | se   |
|-------------------|------|------|------|------|-------|------|-------|------|-------|------|
| 0                 | 0.52 | 0.22 | 0.02 | 0.02 | 0.33  | 0.26 | 0.04  | 0.04 | 0.09  | 0.06 |
| 1                 | 0.58 | 0.24 | 0.02 | 0.02 | 0.27  | 0.28 | 0.04  | 0.04 | 0.08  | 0.06 |
| 2                 | 0.77 | 0.18 | 0.02 | 0.02 | 0.06  | 0.19 | 0.06  | 0.06 | 0.1   | 0.07 |
| 3                 | 0.83 | 0.09 | 0.02 | 0.02 | 0     | 0    | 0.06  | 0.06 | 0.09  | 0.07 |
| 4                 | 0.87 | 0.09 | 0.01 | 0.02 | 0     | 0    | 0.05  | 0.06 | 0.07  | 0.07 |
| 5                 | 0.88 | 0.09 | 0.01 | 0.02 | 0     | 0    | 0.05  | 0.06 | 0.05  | 0.06 |
| 6                 | 0.9  | 0.08 | 0.01 | 0.02 | 0     | 0    | 0.04  | 0.06 | 0.05  | 0.06 |
| 7                 | 0.92 | 0.08 | 0.01 | 0.02 | 0     | 0    | 0.02  | 0.05 | 0.04  | 0.06 |
| 8                 | 0.93 | 0.08 | 0.01 | 0.02 | 0     | 0    | 0.02  | 0.05 | 0.04  | 0.06 |
| 9                 | 0.92 | 0.08 | 0.01 | 0.02 | 0     | 0    | 0.02  | 0.05 | 0.04  | 0.06 |
| 10                | 0.94 | 0.07 | 0.01 | 0.02 | 0     | 0    | 0.02  | 0.04 | 0.04  | 0.06 |
| 11                | 0.94 | 0.07 | 0.01 | 0.02 | 0     | 0    | 0.02  | 0.04 | 0.03  | 0.05 |
| 12                | 0.94 | 0.07 | 0.01 | 0.02 | 0     | 0    | 0.02  | 0.04 | 0.03  | 0.06 |

**age=20 years, timing allo <6 months, cmv=D-/R-, donor=UD, graft=BM, TBI=no TBI, In vivo Tcell depletion=no,**

| Landmark time (y) | GRFS | se   | GF   | se   | AGVHD | se   | CGVHD | se   | Death | se   |
|-------------------|------|------|------|------|-------|------|-------|------|-------|------|
| 0                 | 0.4  | 0.23 | 0.02 | 0.02 | 0.43  | 0.3  | 0.04  | 0.04 | 0.11  | 0.07 |
| 1                 | 0.47 | 0.27 | 0.02 | 0.02 | 0.36  | 0.34 | 0.05  | 0.05 | 0.1   | 0.08 |
| 2                 | 0.68 | 0.22 | 0.02 | 0.02 | 0.08  | 0.26 | 0.08  | 0.08 | 0.14  | 0.1  |
| 3                 | 0.76 | 0.12 | 0.02 | 0.03 | 0     | 0    | 0.08  | 0.08 | 0.13  | 0.1  |
| 4                 | 0.81 | 0.12 | 0.01 | 0.02 | 0     | 0    | 0.07  | 0.08 | 0.1   | 0.09 |
| 5                 | 0.84 | 0.12 | 0.01 | 0.02 | 0     | 0    | 0.08  | 0.08 | 0.08  | 0.09 |
| 6                 | 0.87 | 0.11 | 0.01 | 0.02 | 0     | 0    | 0.06  | 0.08 | 0.07  | 0.08 |
| 7                 | 0.89 | 0.11 | 0.01 | 0.02 | 0     | 0    | 0.03  | 0.07 | 0.06  | 0.08 |
| 8                 | 0.9  | 0.1  | 0.01 | 0.02 | 0     | 0    | 0.03  | 0.07 | 0.06  | 0.08 |
| 9                 | 0.9  | 0.11 | 0.01 | 0.02 | 0     | 0    | 0.03  | 0.07 | 0.06  | 0.08 |
| 10                | 0.91 | 0.1  | 0.01 | 0.02 | 0     | 0    | 0.03  | 0.06 | 0.05  | 0.08 |
| 11                | 0.92 | 0.1  | 0.01 | 0.02 | 0     | 0    | 0.03  | 0.06 | 0.05  | 0.08 |
| 12                | 0.92 | 0.1  | 0.01 | 0.02 | 0     | 0    | 0.03  | 0.06 | 0.05  | 0.08 |

**age=30 years, timing allo <6 months, cmv=D-/R-, donor=UD, graft=BM, TBI=no TBI, In vivo Tcell depletion=no,**

| Landmark time (y) | GRFS | se   | GF   | se   | AGVHD | se   | CGVHD | se   | Death | se   |
|-------------------|------|------|------|------|-------|------|-------|------|-------|------|
| 0                 | 0.27 | 0.23 | 0.01 | 0.01 | 0.54  | 0.33 | 0.04  | 0.05 | 0.13  | 0.09 |

|    |      |      |      |      |      |      |      |      |      |      |
|----|------|------|------|------|------|------|------|------|------|------|
| 1  | 0.34 | 0.28 | 0.02 | 0.02 | 0.47 | 0.4  | 0.06 | 0.07 | 0.12 | 0.11 |
| 2  | 0.58 | 0.27 | 0.02 | 0.03 | 0.11 | 0.36 | 0.11 | 0.1  | 0.18 | 0.14 |
| 3  | 0.68 | 0.16 | 0.02 | 0.03 | 0    | 0    | 0.12 | 0.11 | 0.18 | 0.13 |
| 4  | 0.74 | 0.16 | 0.02 | 0.03 | 0    | 0    | 0.11 | 0.12 | 0.13 | 0.13 |
| 5  | 0.77 | 0.16 | 0.01 | 0.02 | 0    | 0    | 0.11 | 0.12 | 0.11 | 0.12 |
| 6  | 0.81 | 0.16 | 0.01 | 0.02 | 0    | 0    | 0.08 | 0.11 | 0.1  | 0.12 |
| 7  | 0.85 | 0.15 | 0.01 | 0.02 | 0    | 0    | 0.05 | 0.1  | 0.09 | 0.12 |
| 8  | 0.86 | 0.15 | 0.01 | 0.02 | 0    | 0    | 0.05 | 0.1  | 0.08 | 0.11 |
| 9  | 0.85 | 0.15 | 0.01 | 0.03 | 0    | 0    | 0.05 | 0.1  | 0.08 | 0.12 |
| 10 | 0.87 | 0.14 | 0.01 | 0.02 | 0    | 0    | 0.04 | 0.09 | 0.08 | 0.11 |
| 11 | 0.88 | 0.14 | 0.01 | 0.02 | 0    | 0    | 0.04 | 0.09 | 0.07 | 0.11 |
| 12 | 0.88 | 0.14 | 0.01 | 0.02 | 0    | 0    | 0.04 | 0.09 | 0.07 | 0.11 |

**age=40 years, timing allo <6 months, cmv=D-/R-, donor=UD, graft=BM, TBI=no TBI, In vivo Tcell depletion=no,**

| Landmark time (y) | GRFS | se   | GF   | se   | AGVHD | se   | CGVHD | se   | Death | se   |
|-------------------|------|------|------|------|-------|------|-------|------|-------|------|
| 0                 | 0.15 | 0.19 | 0.01 | 0.01 | 0.65  | 0.34 | 0.04  | 0.06 | 0.14  | 0.11 |
| 1                 | 0.21 | 0.26 | 0.01 | 0.02 | 0.59  | 0.45 | 0.06  | 0.08 | 0.13  | 0.14 |
| 2                 | 0.46 | 0.32 | 0.02 | 0.03 | 0.15  | 0.51 | 0.14  | 0.15 | 0.24  | 0.2  |
| 3                 | 0.57 | 0.2  | 0.02 | 0.03 | 0     | 0    | 0.16  | 0.15 | 0.24  | 0.17 |
| 4                 | 0.65 | 0.21 | 0.02 | 0.03 | 0     | 0    | 0.15  | 0.16 | 0.18  | 0.17 |
| 5                 | 0.69 | 0.22 | 0.01 | 0.03 | 0     | 0    | 0.15  | 0.17 | 0.15  | 0.16 |
| 6                 | 0.74 | 0.22 | 0.01 | 0.03 | 0     | 0    | 0.11  | 0.17 | 0.13  | 0.16 |
| 7                 | 0.79 | 0.21 | 0.01 | 0.03 | 0     | 0    | 0.07  | 0.14 | 0.13  | 0.17 |
| 8                 | 0.8  | 0.21 | 0.01 | 0.03 | 0     | 0    | 0.07  | 0.15 | 0.12  | 0.16 |
| 9                 | 0.8  | 0.21 | 0.01 | 0.03 | 0     | 0    | 0.07  | 0.15 | 0.12  | 0.17 |
| 10                | 0.82 | 0.2  | 0.01 | 0.03 | 0     | 0    | 0.06  | 0.13 | 0.11  | 0.16 |
| 11                | 0.84 | 0.2  | 0.01 | 0.03 | 0     | 0    | 0.06  | 0.14 | 0.1   | 0.16 |
| 12                | 0.83 | 0.2  | 0.01 | 0.03 | 0     | 0    | 0.06  | 0.14 | 0.1   | 0.16 |

**age=50 years, timing allo <6 months, cmv=D-/R-, donor=UD, graft=BM, TBI=no TBI, In vivo Tcell depletion=no,**

| Landmark time (y) | GRFS | se   | GF   | se   | AGVHD | se   | CGVHD | se   | Death | se   |
|-------------------|------|------|------|------|-------|------|-------|------|-------|------|
| 0                 | 0.07 | 0.13 | 0.01 | 0.01 | 0.75  | 0.3  | 0.03  | 0.06 | 0.14  | 0.13 |
| 1                 | 0.11 | 0.19 | 0.01 | 0.02 | 0.71  | 0.44 | 0.05  | 0.09 | 0.12  | 0.18 |
| 2                 | 0.32 | 0.34 | 0.02 | 0.03 | 0.21  | 0.71 | 0.16  | 0.21 | 0.29  | 0.3  |
| 3                 | 0.45 | 0.24 | 0.03 | 0.03 | 0     | 0    | 0.2   | 0.2  | 0.32  | 0.23 |
| 4                 | 0.54 | 0.27 | 0.02 | 0.03 | 0     | 0    | 0.2   | 0.23 | 0.25  | 0.23 |
| 5                 | 0.58 | 0.28 | 0.01 | 0.03 | 0     | 0    | 0.21  | 0.24 | 0.19  | 0.22 |
| 6                 | 0.65 | 0.3  | 0.01 | 0.03 | 0     | 0    | 0.16  | 0.24 | 0.18  | 0.23 |
| 7                 | 0.71 | 0.29 | 0.01 | 0.03 | 0     | 0    | 0.1   | 0.21 | 0.18  | 0.24 |
| 8                 | 0.73 | 0.29 | 0.01 | 0.03 | 0     | 0    | 0.1   | 0.22 | 0.16  | 0.23 |
| 9                 | 0.72 | 0.3  | 0.01 | 0.03 | 0     | 0    | 0.1   | 0.22 | 0.16  | 0.23 |
| 10                | 0.76 | 0.29 | 0.01 | 0.03 | 0     | 0    | 0.08  | 0.2  | 0.15  | 0.23 |
| 11                | 0.77 | 0.29 | 0.01 | 0.03 | 0     | 0    | 0.08  | 0.21 | 0.14  | 0.22 |
| 12                | 0.77 | 0.29 | 0.01 | 0.03 | 0     | 0    | 0.08  | 0.21 | 0.14  | 0.23 |

**age=10 years, timing allo >6 months, cmv=others, donor=UD, graft=BM, TBI=no TBI, In vivo Tcell depletion=no,**

| Landmark time (y) | GRFS | se   | GF   | se   | AGVHD | se   | CGVHD | se   | Death | se   |
|-------------------|------|------|------|------|-------|------|-------|------|-------|------|
| 0                 | 0.49 | 0.21 | 0.08 | 0.06 | 0.33  | 0.25 | 0.01  | 0.01 | 0.09  | 0.05 |
| 1                 | 0.55 | 0.23 | 0.09 | 0.06 | 0.27  | 0.27 | 0.01  | 0.01 | 0.08  | 0.05 |
| 2                 | 0.74 | 0.18 | 0.09 | 0.08 | 0.06  | 0.19 | 0.02  | 0.02 | 0.1   | 0.07 |
| 3                 | 0.8  | 0.1  | 0.1  | 0.08 | 0     | 0    | 0.02  | 0.02 | 0.09  | 0.07 |
| 4                 | 0.85 | 0.1  | 0.06 | 0.07 | 0     | 0    | 0.02  | 0.02 | 0.07  | 0.06 |
| 5                 | 0.88 | 0.09 | 0.05 | 0.07 | 0     | 0    | 0.02  | 0.02 | 0.05  | 0.06 |
| 6                 | 0.9  | 0.09 | 0.04 | 0.07 | 0     | 0    | 0.01  | 0.02 | 0.05  | 0.06 |
| 7                 | 0.9  | 0.09 | 0.04 | 0.07 | 0     | 0    | 0.01  | 0.02 | 0.04  | 0.06 |
| 8                 | 0.91 | 0.09 | 0.05 | 0.07 | 0     | 0    | 0.01  | 0.02 | 0.04  | 0.05 |
| 9                 | 0.91 | 0.09 | 0.05 | 0.07 | 0     | 0    | 0.01  | 0.02 | 0.04  | 0.05 |
| 10                | 0.92 | 0.09 | 0.04 | 0.07 | 0     | 0    | 0.01  | 0.02 | 0.04  | 0.05 |
| 11                | 0.92 | 0.08 | 0.04 | 0.07 | 0     | 0    | 0.01  | 0.02 | 0.03  | 0.05 |
| 12                | 0.93 | 0.08 | 0.03 | 0.06 | 0     | 0    | 0.01  | 0.02 | 0.03  | 0.05 |

**age=20 years, timing allo >6 months, cmv=others, donor=UD, graft=BM, TBI=no TBI, In vivo Tcell depletion=no,**

| Landmark time (y) | GRFS | se   | GF   | se   | AGVHD | se   | CGVHD | se   | Death | se   |
|-------------------|------|------|------|------|-------|------|-------|------|-------|------|
| 0                 | 0.37 | 0.2  | 0.08 | 0.05 | 0.43  | 0.27 | 0.01  | 0.02 | 0.11  | 0.06 |
| 1                 | 0.44 | 0.23 | 0.09 | 0.06 | 0.36  | 0.31 | 0.02  | 0.02 | 0.1   | 0.07 |
| 2                 | 0.67 | 0.2  | 0.09 | 0.08 | 0.08  | 0.24 | 0.03  | 0.03 | 0.13  | 0.09 |
| 3                 | 0.74 | 0.11 | 0.1  | 0.08 | 0     | 0    | 0.03  | 0.03 | 0.12  | 0.08 |
| 4                 | 0.81 | 0.11 | 0.07 | 0.08 | 0     | 0    | 0.03  | 0.03 | 0.09  | 0.08 |
| 5                 | 0.84 | 0.11 | 0.06 | 0.07 | 0     | 0    | 0.03  | 0.03 | 0.07  | 0.08 |
| 6                 | 0.87 | 0.1  | 0.05 | 0.07 | 0     | 0    | 0.02  | 0.03 | 0.07  | 0.07 |
| 7                 | 0.88 | 0.1  | 0.05 | 0.07 | 0     | 0    | 0.01  | 0.02 | 0.06  | 0.07 |
| 8                 | 0.88 | 0.1  | 0.05 | 0.07 | 0     | 0    | 0.01  | 0.02 | 0.06  | 0.07 |
| 9                 | 0.88 | 0.1  | 0.05 | 0.07 | 0     | 0    | 0.01  | 0.02 | 0.06  | 0.07 |
| 10                | 0.89 | 0.1  | 0.04 | 0.07 | 0     | 0    | 0.01  | 0.02 | 0.05  | 0.07 |
| 11                | 0.9  | 0.1  | 0.05 | 0.07 | 0     | 0    | 0.01  | 0.02 | 0.05  | 0.07 |
| 12                | 0.91 | 0.1  | 0.04 | 0.07 | 0     | 0    | 0.01  | 0.02 | 0.05  | 0.07 |

**age=30 years, timing allo >6 months, cmv=others, donor=UD, graft=BM, TBI=no TBI, In vivo Tcell depletion=no,**

| Landmark time (y) | GRFS | se   | GF   | se   | AGVHD | se   | CGVHD | se   | Death | se   |
|-------------------|------|------|------|------|-------|------|-------|------|-------|------|
| 0                 | 0.26 | 0.19 | 0.07 | 0.05 | 0.54  | 0.28 | 0.01  | 0.02 | 0.12  | 0.07 |
| 1                 | 0.32 | 0.23 | 0.08 | 0.06 | 0.47  | 0.34 | 0.02  | 0.02 | 0.11  | 0.09 |
| 2                 | 0.58 | 0.23 | 0.1  | 0.08 | 0.11  | 0.31 | 0.04  | 0.03 | 0.18  | 0.11 |
| 3                 | 0.68 | 0.13 | 0.11 | 0.09 | 0     | 0    | 0.04  | 0.04 | 0.17  | 0.11 |
| 4                 | 0.76 | 0.13 | 0.07 | 0.08 | 0     | 0    | 0.04  | 0.04 | 0.13  | 0.11 |
| 5                 | 0.79 | 0.13 | 0.06 | 0.08 | 0     | 0    | 0.04  | 0.04 | 0.11  | 0.1  |
| 6                 | 0.82 | 0.12 | 0.05 | 0.08 | 0     | 0    | 0.03  | 0.04 | 0.09  | 0.1  |
| 7                 | 0.84 | 0.12 | 0.06 | 0.08 | 0     | 0    | 0.02  | 0.03 | 0.09  | 0.1  |
| 8                 | 0.85 | 0.12 | 0.06 | 0.08 | 0     | 0    | 0.02  | 0.03 | 0.08  | 0.09 |

|    |      |      |      |      |   |   |      |      |      |      |
|----|------|------|------|------|---|---|------|------|------|------|
| 9  | 0.84 | 0.13 | 0.06 | 0.08 | 0 | 0 | 0.02 | 0.03 | 0.08 | 0.1  |
| 10 | 0.86 | 0.12 | 0.05 | 0.08 | 0 | 0 | 0.01 | 0.03 | 0.07 | 0.09 |
| 11 | 0.87 | 0.12 | 0.05 | 0.08 | 0 | 0 | 0.01 | 0.03 | 0.07 | 0.09 |
| 12 | 0.88 | 0.12 | 0.04 | 0.07 | 0 | 0 | 0.01 | 0.03 | 0.07 | 0.09 |

**age=40 years, timing allo >6 months, cmv=others, donor=UD, graft=BM, TBI=no TBI, In vivo Tcell depletion=no,**

| Landmark time (y) | GRFS | se   | GF   | se   | AGVHD | se   | CGVHD | se   | Death | se   |
|-------------------|------|------|------|------|-------|------|-------|------|-------|------|
| 0                 | 0.15 | 0.15 | 0.06 | 0.04 | 0.65  | 0.26 | 0.01  | 0.02 | 0.13  | 0.09 |
| 1                 | 0.21 | 0.2  | 0.07 | 0.06 | 0.58  | 0.35 | 0.02  | 0.02 | 0.12  | 0.11 |
| 2                 | 0.48 | 0.26 | 0.1  | 0.09 | 0.15  | 0.41 | 0.05  | 0.05 | 0.23  | 0.16 |
| 3                 | 0.59 | 0.15 | 0.12 | 0.09 | 0     | 0    | 0.05  | 0.05 | 0.23  | 0.14 |
| 4                 | 0.69 | 0.16 | 0.08 | 0.09 | 0     | 0    | 0.05  | 0.06 | 0.18  | 0.14 |
| 5                 | 0.73 | 0.16 | 0.07 | 0.09 | 0     | 0    | 0.06  | 0.06 | 0.15  | 0.14 |
| 6                 | 0.77 | 0.16 | 0.06 | 0.08 | 0     | 0    | 0.04  | 0.06 | 0.13  | 0.13 |
| 7                 | 0.79 | 0.16 | 0.06 | 0.09 | 0     | 0    | 0.02  | 0.05 | 0.12  | 0.13 |
| 8                 | 0.8  | 0.15 | 0.06 | 0.09 | 0     | 0    | 0.02  | 0.05 | 0.11  | 0.13 |
| 9                 | 0.8  | 0.16 | 0.06 | 0.09 | 0     | 0    | 0.02  | 0.05 | 0.11  | 0.13 |
| 10                | 0.82 | 0.15 | 0.05 | 0.09 | 0     | 0    | 0.02  | 0.04 | 0.1   | 0.13 |
| 11                | 0.83 | 0.15 | 0.06 | 0.09 | 0     | 0    | 0.02  | 0.04 | 0.09  | 0.12 |
| 12                | 0.84 | 0.15 | 0.05 | 0.08 | 0     | 0    | 0.02  | 0.04 | 0.1   | 0.13 |

**age=50 years, timing allo >6 months, cmv=others, donor=UD, graft=BM, TBI=no TBI, In vivo Tcell depletion=no,**

| Landmark time (y) | GRFS | se   | GF   | se   | AGVHD | se   | CGVHD | se   | Death | se   |
|-------------------|------|------|------|------|-------|------|-------|------|-------|------|
| 0                 | 0.07 | 0.1  | 0.04 | 0.04 | 0.74  | 0.22 | 0.01  | 0.02 | 0.14  | 0.09 |
| 1                 | 0.11 | 0.15 | 0.06 | 0.05 | 0.7   | 0.33 | 0.02  | 0.03 | 0.11  | 0.13 |
| 2                 | 0.36 | 0.28 | 0.09 | 0.1  | 0.21  | 0.54 | 0.06  | 0.06 | 0.28  | 0.23 |
| 3                 | 0.49 | 0.18 | 0.13 | 0.1  | 0     | 0    | 0.07  | 0.07 | 0.31  | 0.18 |
| 4                 | 0.6  | 0.2  | 0.08 | 0.1  | 0     | 0    | 0.07  | 0.08 | 0.25  | 0.19 |
| 5                 | 0.65 | 0.2  | 0.07 | 0.1  | 0     | 0    | 0.08  | 0.08 | 0.2   | 0.18 |
| 6                 | 0.7  | 0.2  | 0.06 | 0.1  | 0     | 0    | 0.06  | 0.08 | 0.18  | 0.18 |
| 7                 | 0.73 | 0.2  | 0.07 | 0.1  | 0     | 0    | 0.03  | 0.07 | 0.17  | 0.18 |
| 8                 | 0.74 | 0.2  | 0.07 | 0.1  | 0     | 0    | 0.03  | 0.07 | 0.16  | 0.18 |
| 9                 | 0.74 | 0.21 | 0.07 | 0.11 | 0     | 0    | 0.04  | 0.07 | 0.16  | 0.18 |
| 10                | 0.77 | 0.2  | 0.06 | 0.1  | 0     | 0    | 0.03  | 0.06 | 0.15  | 0.18 |
| 11                | 0.78 | 0.2  | 0.06 | 0.1  | 0     | 0    | 0.03  | 0.06 | 0.13  | 0.18 |
| 12                | 0.79 | 0.2  | 0.05 | 0.1  | 0     | 0    | 0.03  | 0.07 | 0.14  | 0.18 |

**age=10 years, timing allo <6 months, cmv=others, donor=UD, graft=BM, TBI=no TBI, In vivo Tcell depletion=no,**

| Landmark time (y) | GRFS | se   | GF   | se   | AGVHD | se   | CGVHD | se   | Death | se   |
|-------------------|------|------|------|------|-------|------|-------|------|-------|------|
| 0                 | 0.33 | 0.25 | 0.06 | 0.04 | 0.54  | 0.32 | 0.02  | 0.02 | 0.06  | 0.04 |
| 1                 | 0.4  | 0.3  | 0.06 | 0.05 | 0.46  | 0.38 | 0.02  | 0.03 | 0.05  | 0.05 |
| 2                 | 0.7  | 0.28 | 0.08 | 0.07 | 0.11  | 0.34 | 0.04  | 0.04 | 0.08  | 0.06 |
| 3                 | 0.79 | 0.09 | 0.09 | 0.07 | 0     | 0    | 0.05  | 0.04 | 0.08  | 0.06 |
| 4                 | 0.85 | 0.09 | 0.06 | 0.06 | 0     | 0    | 0.04  | 0.05 | 0.06  | 0.06 |

|    |      |      |      |      |   |   |      |      |      |      |
|----|------|------|------|------|---|---|------|------|------|------|
| 5  | 0.87 | 0.09 | 0.05 | 0.06 | 0 | 0 | 0.04 | 0.05 | 0.05 | 0.05 |
| 6  | 0.89 | 0.08 | 0.04 | 0.06 | 0 | 0 | 0.03 | 0.04 | 0.04 | 0.05 |
| 7  | 0.9  | 0.08 | 0.04 | 0.06 | 0 | 0 | 0.02 | 0.04 | 0.04 | 0.05 |
| 8  | 0.91 | 0.08 | 0.04 | 0.06 | 0 | 0 | 0.02 | 0.04 | 0.03 | 0.05 |
| 9  | 0.9  | 0.08 | 0.04 | 0.06 | 0 | 0 | 0.02 | 0.04 | 0.03 | 0.05 |
| 10 | 0.92 | 0.08 | 0.04 | 0.06 | 0 | 0 | 0.01 | 0.03 | 0.03 | 0.05 |
| 11 | 0.92 | 0.08 | 0.04 | 0.06 | 0 | 0 | 0.01 | 0.03 | 0.03 | 0.04 |
| 12 | 0.93 | 0.08 | 0.03 | 0.05 | 0 | 0 | 0.01 | 0.03 | 0.03 | 0.05 |

**age=20 years, timing allo <6 months, cmv=others, donor=UD, graft=BM, TBI=no TBI, In vivo Tcell depletion=no,**

| Landmark time (y) | GRFS | se   | GF   | se   | AGVHD | se   | CGVHD | se   | Death | se   |
|-------------------|------|------|------|------|-------|------|-------|------|-------|------|
| 0                 | 0.21 | 0.22 | 0.05 | 0.04 | 0.66  | 0.31 | 0.02  | 0.02 | 0.06  | 0.05 |
| 1                 | 0.28 | 0.28 | 0.06 | 0.05 | 0.58  | 0.39 | 0.02  | 0.03 | 0.06  | 0.06 |
| 2                 | 0.61 | 0.33 | 0.08 | 0.07 | 0.15  | 0.44 | 0.06  | 0.06 | 0.11  | 0.08 |
| 3                 | 0.73 | 0.11 | 0.1  | 0.07 | 0     | 0    | 0.06  | 0.06 | 0.11  | 0.08 |
| 4                 | 0.8  | 0.11 | 0.06 | 0.07 | 0     | 0    | 0.06  | 0.06 | 0.08  | 0.07 |
| 5                 | 0.83 | 0.11 | 0.05 | 0.06 | 0     | 0    | 0.06  | 0.06 | 0.06  | 0.07 |
| 6                 | 0.85 | 0.1  | 0.04 | 0.06 | 0     | 0    | 0.04  | 0.06 | 0.06  | 0.07 |
| 7                 | 0.88 | 0.1  | 0.05 | 0.06 | 0     | 0    | 0.03  | 0.05 | 0.05  | 0.07 |
| 8                 | 0.88 | 0.1  | 0.05 | 0.06 | 0     | 0    | 0.03  | 0.05 | 0.05  | 0.06 |
| 9                 | 0.88 | 0.1  | 0.05 | 0.07 | 0     | 0    | 0.03  | 0.05 | 0.05  | 0.07 |
| 10                | 0.89 | 0.1  | 0.04 | 0.06 | 0     | 0    | 0.02  | 0.05 | 0.04  | 0.06 |
| 11                | 0.9  | 0.1  | 0.04 | 0.06 | 0     | 0    | 0.02  | 0.05 | 0.04  | 0.06 |
| 12                | 0.9  | 0.09 | 0.03 | 0.06 | 0     | 0    | 0.02  | 0.05 | 0.04  | 0.06 |

**age=30 years, timing allo <6 months, cmv=others, donor=UD, graft=BM, TBI=no TBI, In vivo Tcell depletion=no,**

| Landmark time (y) | GRFS | se   | GF   | se   | AGVHD | se   | CGVHD | se   | Death | se   |
|-------------------|------|------|------|------|-------|------|-------|------|-------|------|
| 0                 | 0.11 | 0.17 | 0.04 | 0.04 | 0.77  | 0.26 | 0.02  | 0.03 | 0.06  | 0.05 |
| 1                 | 0.17 | 0.24 | 0.05 | 0.05 | 0.7   | 0.37 | 0.02  | 0.04 | 0.06  | 0.07 |
| 2                 | 0.51 | 0.38 | 0.08 | 0.09 | 0.2   | 0.57 | 0.08  | 0.08 | 0.14  | 0.13 |
| 3                 | 0.66 | 0.13 | 0.1  | 0.08 | 0     | 0    | 0.09  | 0.08 | 0.15  | 0.1  |
| 4                 | 0.74 | 0.14 | 0.07 | 0.08 | 0     | 0    | 0.08  | 0.08 | 0.11  | 0.1  |
| 5                 | 0.77 | 0.14 | 0.05 | 0.07 | 0     | 0    | 0.09  | 0.09 | 0.09  | 0.09 |
| 6                 | 0.81 | 0.13 | 0.05 | 0.07 | 0     | 0    | 0.06  | 0.08 | 0.08  | 0.09 |
| 7                 | 0.84 | 0.13 | 0.05 | 0.07 | 0     | 0    | 0.04  | 0.07 | 0.07  | 0.09 |
| 8                 | 0.84 | 0.13 | 0.05 | 0.07 | 0     | 0    | 0.04  | 0.07 | 0.07  | 0.09 |
| 9                 | 0.84 | 0.13 | 0.05 | 0.08 | 0     | 0    | 0.04  | 0.07 | 0.07  | 0.09 |
| 10                | 0.86 | 0.13 | 0.05 | 0.07 | 0     | 0    | 0.03  | 0.07 | 0.06  | 0.09 |
| 11                | 0.87 | 0.12 | 0.05 | 0.07 | 0     | 0    | 0.03  | 0.07 | 0.06  | 0.08 |
| 12                | 0.87 | 0.12 | 0.04 | 0.07 | 0     | 0    | 0.03  | 0.07 | 0.06  | 0.09 |

**age=40 years, timing allo <6 months, cmv=others, donor=UD, graft=BM, TBI=no TBI, In vivo Tcell depletion=no,**

| Landmark time (y) | GRFS | se   | GF   | se   | AGVHD | se   | CGVHD | se   | Death | se   |
|-------------------|------|------|------|------|-------|------|-------|------|-------|------|
| 0                 | 0.04 | 0.09 | 0.03 | 0.03 | 0.86  | 0.18 | 0.01  | 0.02 | 0.06  | 0.05 |

|    |      |      |      |      |      |      |      |      |      |      |
|----|------|------|------|------|------|------|------|------|------|------|
| 1  | 0.08 | 0.16 | 0.04 | 0.04 | 0.82 | 0.3  | 0.02 | 0.04 | 0.05 | 0.08 |
| 2  | 0.39 | 0.42 | 0.07 | 0.1  | 0.28 | 0.75 | 0.09 | 0.12 | 0.17 | 0.2  |
| 3  | 0.57 | 0.16 | 0.11 | 0.09 | 0    | 0    | 0.12 | 0.11 | 0.2  | 0.14 |
| 4  | 0.66 | 0.18 | 0.07 | 0.09 | 0    | 0    | 0.12 | 0.12 | 0.15 | 0.14 |
| 5  | 0.7  | 0.18 | 0.06 | 0.08 | 0    | 0    | 0.12 | 0.12 | 0.12 | 0.13 |
| 6  | 0.75 | 0.18 | 0.05 | 0.08 | 0    | 0    | 0.09 | 0.12 | 0.11 | 0.13 |
| 7  | 0.78 | 0.17 | 0.06 | 0.09 | 0    | 0    | 0.05 | 0.1  | 0.11 | 0.13 |
| 8  | 0.79 | 0.17 | 0.06 | 0.09 | 0    | 0    | 0.06 | 0.1  | 0.1  | 0.13 |
| 9  | 0.79 | 0.18 | 0.06 | 0.09 | 0    | 0    | 0.06 | 0.1  | 0.1  | 0.13 |
| 10 | 0.82 | 0.17 | 0.05 | 0.09 | 0    | 0    | 0.04 | 0.1  | 0.09 | 0.13 |
| 11 | 0.83 | 0.17 | 0.05 | 0.09 | 0    | 0    | 0.04 | 0.1  | 0.08 | 0.12 |
| 12 | 0.83 | 0.17 | 0.04 | 0.08 | 0    | 0    | 0.05 | 0.1  | 0.08 | 0.12 |

**age=50 years, timing allo <6 months, cmv=others, donor=UD, graft=BM, TBI=no TBI, In vivo Tcell depletion=no,**

| Landmark time (y) | GRFS | se   | GF   | se   | AGVHD | se   | CGVHD | se   | Death | se   |
|-------------------|------|------|------|------|-------|------|-------|------|-------|------|
| 0                 | 0.01 | 0.03 | 0.02 | 0.02 | 0.9   | 0.1  | 0     | 0.01 | 0.06  | 0.05 |
| 1                 | 0.03 | 0.08 | 0.03 | 0.03 | 0.9   | 0.19 | 0.01  | 0.03 | 0.04  | 0.07 |
| 2                 | 0.26 | 0.43 | 0.07 | 0.12 | 0.38  | 0.97 | 0.1   | 0.18 | 0.19  | 0.31 |
| 3                 | 0.46 | 0.2  | 0.11 | 0.1  | 0     | 0    | 0.16  | 0.14 | 0.27  | 0.18 |
| 4                 | 0.56 | 0.22 | 0.07 | 0.1  | 0     | 0    | 0.16  | 0.17 | 0.21  | 0.19 |
| 5                 | 0.6  | 0.23 | 0.06 | 0.09 | 0     | 0    | 0.17  | 0.18 | 0.17  | 0.18 |
| 6                 | 0.66 | 0.24 | 0.06 | 0.1  | 0     | 0    | 0.13  | 0.18 | 0.15  | 0.18 |
| 7                 | 0.72 | 0.23 | 0.06 | 0.1  | 0     | 0    | 0.08  | 0.15 | 0.15  | 0.18 |
| 8                 | 0.73 | 0.23 | 0.06 | 0.11 | 0     | 0    | 0.08  | 0.15 | 0.13  | 0.18 |
| 9                 | 0.72 | 0.24 | 0.06 | 0.11 | 0     | 0    | 0.08  | 0.16 | 0.14  | 0.18 |
| 10                | 0.76 | 0.23 | 0.05 | 0.1  | 0     | 0    | 0.06  | 0.14 | 0.13  | 0.18 |
| 11                | 0.77 | 0.23 | 0.06 | 0.11 | 0     | 0    | 0.06  | 0.15 | 0.11  | 0.17 |
| 12                | 0.77 | 0.23 | 0.05 | 0.1  | 0     | 0    | 0.07  | 0.15 | 0.12  | 0.18 |

**age=10 years, timing allo >6 months, cmv=D-/R-, donor=MRD, graft=PBSC, TBI=no TBI, In vivo Tcell depletion=no,**

| Landmark time (y) | GRFS | se   | GF   | se   | AGVHD | se   | CGVHD | se   | Death | se   |
|-------------------|------|------|------|------|-------|------|-------|------|-------|------|
| 0                 | 0.9  | 0.05 | 0.01 | 0.02 | 0.02  | 0.02 | 0.02  | 0.02 | 0.05  | 0.03 |
| 1                 | 0.91 | 0.05 | 0.01 | 0.02 | 0.01  | 0.02 | 0.02  | 0.02 | 0.05  | 0.03 |
| 2                 | 0.92 | 0.05 | 0.01 | 0.02 | 0     | 0.01 | 0.02  | 0.02 | 0.04  | 0.03 |
| 3                 | 0.93 | 0.04 | 0.01 | 0.02 | 0     | 0    | 0.02  | 0.03 | 0.04  | 0.03 |
| 4                 | 0.95 | 0.04 | 0.01 | 0.01 | 0     | 0    | 0.02  | 0.03 | 0.03  | 0.03 |
| 5                 | 0.95 | 0.04 | 0.01 | 0.01 | 0     | 0    | 0.02  | 0.03 | 0.02  | 0.03 |
| 6                 | 0.96 | 0.04 | 0.01 | 0.01 | 0     | 0    | 0.01  | 0.02 | 0.02  | 0.03 |
| 7                 | 0.97 | 0.03 | 0.01 | 0.01 | 0     | 0    | 0.01  | 0.02 | 0.02  | 0.03 |
| 8                 | 0.97 | 0.03 | 0.01 | 0.01 | 0     | 0    | 0.01  | 0.02 | 0.02  | 0.02 |
| 9                 | 0.97 | 0.03 | 0.01 | 0.01 | 0     | 0    | 0.01  | 0.02 | 0.02  | 0.03 |
| 10                | 0.97 | 0.03 | 0    | 0.01 | 0     | 0    | 0.01  | 0.02 | 0.01  | 0.02 |
| 11                | 0.98 | 0.03 | 0    | 0.01 | 0     | 0    | 0.01  | 0.02 | 0.01  | 0.02 |
| 12                | 0.98 | 0.03 | 0    | 0.01 | 0     | 0    | 0.01  | 0.02 | 0.01  | 0.02 |

**age=20 years, timing allo >6 months, cmv=D-/R-, donor=MRD, graft=PBSC, TBI=no TBI, In vivo Tcell depletion=no,**

| Landmark time (y) | GRFS | se   | GF   | se   | AGVHD | se   | CGVHD | se   | Death | se   |
|-------------------|------|------|------|------|-------|------|-------|------|-------|------|
| 0                 | 0.86 | 0.06 | 0.02 | 0.02 | 0.02  | 0.02 | 0.03  | 0.03 | 0.07  | 0.04 |
| 1                 | 0.87 | 0.06 | 0.02 | 0.02 | 0.02  | 0.02 | 0.03  | 0.03 | 0.06  | 0.04 |
| 2                 | 0.89 | 0.06 | 0.01 | 0.02 | 0     | 0.01 | 0.03  | 0.03 | 0.06  | 0.04 |
| 3                 | 0.9  | 0.06 | 0.01 | 0.02 | 0     | 0    | 0.03  | 0.03 | 0.05  | 0.04 |
| 4                 | 0.93 | 0.05 | 0.01 | 0.02 | 0     | 0    | 0.03  | 0.03 | 0.04  | 0.04 |
| 5                 | 0.93 | 0.05 | 0.01 | 0.01 | 0     | 0    | 0.03  | 0.03 | 0.03  | 0.04 |
| 6                 | 0.95 | 0.05 | 0.01 | 0.01 | 0     | 0    | 0.02  | 0.03 | 0.03  | 0.04 |
| 7                 | 0.96 | 0.04 | 0.01 | 0.01 | 0     | 0    | 0.01  | 0.03 | 0.03  | 0.03 |
| 8                 | 0.96 | 0.04 | 0.01 | 0.01 | 0     | 0    | 0.01  | 0.03 | 0.02  | 0.03 |
| 9                 | 0.96 | 0.05 | 0.01 | 0.01 | 0     | 0    | 0.01  | 0.03 | 0.02  | 0.03 |
| 10                | 0.96 | 0.04 | 0.01 | 0.01 | 0     | 0    | 0.01  | 0.02 | 0.02  | 0.03 |
| 11                | 0.97 | 0.04 | 0.01 | 0.01 | 0     | 0    | 0.01  | 0.02 | 0.02  | 0.03 |
| 12                | 0.97 | 0.04 | 0    | 0.01 | 0     | 0    | 0.01  | 0.02 | 0.02  | 0.03 |

**age=30 years, timing allo >6 months, cmv=D-/R-, donor=MRD, graft=PBSC, TBI=no TBI, In vivo Tcell depletion=no,**

| Landmark time (y) | GRFS | se   | GF   | se   | AGVHD | se   | CGVHD | se   | Death | se   |
|-------------------|------|------|------|------|-------|------|-------|------|-------|------|
| 0                 | 0.8  | 0.07 | 0.02 | 0.02 | 0.03  | 0.03 | 0.04  | 0.04 | 0.1   | 0.05 |
| 1                 | 0.82 | 0.07 | 0.02 | 0.02 | 0.03  | 0.03 | 0.04  | 0.04 | 0.09  | 0.06 |
| 2                 | 0.85 | 0.07 | 0.01 | 0.02 | 0     | 0.02 | 0.05  | 0.04 | 0.09  | 0.06 |
| 3                 | 0.86 | 0.07 | 0.01 | 0.02 | 0     | 0    | 0.04  | 0.05 | 0.08  | 0.06 |
| 4                 | 0.9  | 0.07 | 0.01 | 0.02 | 0     | 0    | 0.04  | 0.05 | 0.06  | 0.05 |
| 5                 | 0.91 | 0.07 | 0.01 | 0.02 | 0     | 0    | 0.04  | 0.05 | 0.04  | 0.05 |
| 6                 | 0.93 | 0.06 | 0.01 | 0.02 | 0     | 0    | 0.03  | 0.04 | 0.04  | 0.05 |
| 7                 | 0.94 | 0.06 | 0.01 | 0.02 | 0     | 0    | 0.02  | 0.04 | 0.04  | 0.05 |
| 8                 | 0.94 | 0.06 | 0.01 | 0.02 | 0     | 0    | 0.02  | 0.04 | 0.03  | 0.04 |
| 9                 | 0.94 | 0.06 | 0.01 | 0.02 | 0     | 0    | 0.02  | 0.04 | 0.03  | 0.05 |
| 10                | 0.95 | 0.06 | 0.01 | 0.02 | 0     | 0    | 0.01  | 0.03 | 0.03  | 0.04 |
| 11                | 0.95 | 0.05 | 0.01 | 0.02 | 0     | 0    | 0.01  | 0.03 | 0.03  | 0.04 |
| 12                | 0.95 | 0.06 | 0    | 0.01 | 0     | 0    | 0.01  | 0.03 | 0.03  | 0.04 |

**age=40 years, timing allo >6 months, cmv=D-/R-, donor=MRD, graft=PBSC, TBI=no TBI, In vivo Tcell depletion=no,**

| Landmark time (y) | GRFS | se   | GF   | se   | AGVHD | se   | CGVHD | se   | Death | se   |
|-------------------|------|------|------|------|-------|------|-------|------|-------|------|
| 0                 | 0.73 | 0.09 | 0.02 | 0.02 | 0.05  | 0.04 | 0.06  | 0.05 | 0.14  | 0.07 |
| 1                 | 0.76 | 0.09 | 0.02 | 0.02 | 0.04  | 0.04 | 0.06  | 0.05 | 0.13  | 0.07 |
| 2                 | 0.79 | 0.1  | 0.02 | 0.02 | 0.01  | 0.02 | 0.07  | 0.06 | 0.12  | 0.08 |
| 3                 | 0.81 | 0.1  | 0.02 | 0.02 | 0     | 0    | 0.06  | 0.06 | 0.11  | 0.08 |
| 4                 | 0.85 | 0.09 | 0.01 | 0.02 | 0     | 0    | 0.06  | 0.06 | 0.08  | 0.07 |
| 5                 | 0.87 | 0.09 | 0.01 | 0.02 | 0     | 0    | 0.06  | 0.06 | 0.06  | 0.07 |
| 6                 | 0.89 | 0.09 | 0.01 | 0.02 | 0     | 0    | 0.04  | 0.06 | 0.06  | 0.06 |
| 7                 | 0.92 | 0.08 | 0.01 | 0.02 | 0     | 0    | 0.03  | 0.05 | 0.05  | 0.06 |
| 8                 | 0.92 | 0.08 | 0.01 | 0.02 | 0     | 0    | 0.03  | 0.05 | 0.05  | 0.06 |



|    |      |      |      |      |   |   |      |      |      |      |
|----|------|------|------|------|---|---|------|------|------|------|
| 9  | 0.92 | 0.08 | 0.01 | 0.02 | 0 | 0 | 0.03 | 0.05 | 0.05 | 0.06 |
| 10 | 0.93 | 0.08 | 0.01 | 0.02 | 0 | 0 | 0.02 | 0.05 | 0.04 | 0.06 |
| 11 | 0.93 | 0.08 | 0.01 | 0.02 | 0 | 0 | 0.02 | 0.05 | 0.04 | 0.06 |
| 12 | 0.93 | 0.08 | 0.01 | 0.02 | 0 | 0 | 0.02 | 0.05 | 0.04 | 0.06 |

**age=50 years, timing allo >6 months, cmv=D-/R-, donor=MRD, graft=PBSC, TBI=no TBI, In vivo Tcell depletion=no,**

| Landmark time (y) | GRFS | se   | GF   | se   | AGVHD | se   | CGVHD | se   | Death | se   |
|-------------------|------|------|------|------|-------|------|-------|------|-------|------|
| 0                 | 0.64 | 0.12 | 0.02 | 0.02 | 0.06  | 0.06 | 0.08  | 0.07 | 0.2   | 0.09 |
| 1                 | 0.68 | 0.12 | 0.02 | 0.02 | 0.05  | 0.06 | 0.08  | 0.07 | 0.17  | 0.1  |
| 2                 | 0.71 | 0.13 | 0.02 | 0.02 | 0.01  | 0.03 | 0.09  | 0.08 | 0.17  | 0.1  |
| 3                 | 0.74 | 0.13 | 0.02 | 0.02 | 0     | 0    | 0.09  | 0.09 | 0.15  | 0.1  |
| 4                 | 0.8  | 0.13 | 0.01 | 0.02 | 0     | 0    | 0.08  | 0.09 | 0.11  | 0.1  |
| 5                 | 0.82 | 0.13 | 0.01 | 0.02 | 0     | 0    | 0.08  | 0.09 | 0.09  | 0.09 |
| 6                 | 0.85 | 0.12 | 0.01 | 0.02 | 0     | 0    | 0.06  | 0.09 | 0.08  | 0.09 |
| 7                 | 0.88 | 0.11 | 0.01 | 0.02 | 0     | 0    | 0.04  | 0.07 | 0.07  | 0.09 |
| 8                 | 0.89 | 0.11 | 0.01 | 0.02 | 0     | 0    | 0.04  | 0.07 | 0.07  | 0.09 |
| 9                 | 0.88 | 0.11 | 0.01 | 0.02 | 0     | 0    | 0.04  | 0.08 | 0.07  | 0.09 |
| 10                | 0.9  | 0.11 | 0.01 | 0.02 | 0     | 0    | 0.03  | 0.07 | 0.06  | 0.09 |
| 11                | 0.91 | 0.11 | 0.01 | 0.02 | 0     | 0    | 0.03  | 0.07 | 0.06  | 0.08 |
| 12                | 0.91 | 0.11 | 0.01 | 0.02 | 0     | 0    | 0.03  | 0.07 | 0.06  | 0.09 |

**age=10 years, timing allo <6 months, cmv=D-/R-, donor=MRD, graft=PBSC, TBI=no TBI, In vivo Tcell depletion=no,**

| Landmark time (y) | GRFS | se   | GF   | se   | AGVHD | se   | CGVHD | se   | Death | se   |
|-------------------|------|------|------|------|-------|------|-------|------|-------|------|
| 0                 | 0.87 | 0.06 | 0.01 | 0.01 | 0.03  | 0.03 | 0.04  | 0.05 | 0.04  | 0.03 |
| 1                 | 0.88 | 0.06 | 0.01 | 0.01 | 0.03  | 0.03 | 0.05  | 0.05 | 0.04  | 0.03 |
| 2                 | 0.9  | 0.06 | 0.01 | 0.01 | 0     | 0.02 | 0.05  | 0.05 | 0.04  | 0.03 |
| 3                 | 0.91 | 0.06 | 0.01 | 0.01 | 0     | 0    | 0.05  | 0.05 | 0.03  | 0.03 |
| 4                 | 0.93 | 0.06 | 0.01 | 0.01 | 0     | 0    | 0.04  | 0.05 | 0.02  | 0.03 |
| 5                 | 0.93 | 0.06 | 0.01 | 0.01 | 0     | 0    | 0.04  | 0.05 | 0.02  | 0.02 |
| 6                 | 0.95 | 0.06 | 0    | 0.01 | 0     | 0    | 0.03  | 0.05 | 0.02  | 0.02 |
| 7                 | 0.96 | 0.05 | 0    | 0.01 | 0     | 0    | 0.02  | 0.04 | 0.02  | 0.02 |
| 8                 | 0.96 | 0.05 | 0    | 0.01 | 0     | 0    | 0.02  | 0.04 | 0.01  | 0.02 |
| 9                 | 0.96 | 0.05 | 0.01 | 0.01 | 0     | 0    | 0.02  | 0.04 | 0.01  | 0.02 |
| 10                | 0.97 | 0.05 | 0    | 0.01 | 0     | 0    | 0.01  | 0.04 | 0.01  | 0.02 |
| 11                | 0.97 | 0.05 | 0    | 0.01 | 0     | 0    | 0.01  | 0.04 | 0.01  | 0.02 |
| 12                | 0.97 | 0.05 | 0    | 0.01 | 0     | 0    | 0.01  | 0.04 | 0.01  | 0.02 |

**age=20 years, timing allo <6 months, cmv=D-/R-, donor=MRD, graft=PBSC, TBI=no TBI, In vivo Tcell depletion=no,**

| Landmark time (y) | GRFS | se   | GF   | se   | AGVHD | se   | CGVHD | se   | Death | se   |
|-------------------|------|------|------|------|-------|------|-------|------|-------|------|
| 0                 | 0.81 | 0.08 | 0.01 | 0.01 | 0.05  | 0.04 | 0.06  | 0.06 | 0.06  | 0.04 |
| 1                 | 0.83 | 0.08 | 0.01 | 0.01 | 0.04  | 0.04 | 0.06  | 0.06 | 0.05  | 0.04 |
| 2                 | 0.86 | 0.08 | 0.01 | 0.01 | 0.01  | 0.02 | 0.07  | 0.07 | 0.05  | 0.04 |
| 3                 | 0.87 | 0.08 | 0.01 | 0.02 | 0     | 0    | 0.07  | 0.07 | 0.05  | 0.04 |
| 4                 | 0.9  | 0.08 | 0.01 | 0.01 | 0     | 0    | 0.06  | 0.07 | 0.03  | 0.04 |

|    |      |      |      |      |   |   |      |      |      |      |
|----|------|------|------|------|---|---|------|------|------|------|
| 5  | 0.91 | 0.08 | 0.01 | 0.01 | 0 | 0 | 0.06 | 0.08 | 0.03 | 0.03 |
| 6  | 0.93 | 0.08 | 0.01 | 0.01 | 0 | 0 | 0.04 | 0.07 | 0.02 | 0.03 |
| 7  | 0.95 | 0.07 | 0.01 | 0.01 | 0 | 0 | 0.03 | 0.06 | 0.02 | 0.03 |
| 8  | 0.95 | 0.07 | 0.01 | 0.01 | 0 | 0 | 0.03 | 0.06 | 0.02 | 0.03 |
| 9  | 0.95 | 0.07 | 0.01 | 0.01 | 0 | 0 | 0.03 | 0.06 | 0.02 | 0.03 |
| 10 | 0.96 | 0.06 | 0    | 0.01 | 0 | 0 | 0.02 | 0.05 | 0.02 | 0.03 |
| 11 | 0.96 | 0.06 | 0    | 0.01 | 0 | 0 | 0.02 | 0.05 | 0.02 | 0.03 |
| 12 | 0.96 | 0.06 | 0    | 0.01 | 0 | 0 | 0.02 | 0.05 | 0.02 | 0.03 |

**age=30 years, timing allo <6 months, cmv=D-/R-, donor=MRD, graft=PBSC, TBI=no TBI, In vivo Tcell depletion=no,**

| Landmark time (y) | GRFS | se   | GF   | se   | AGVHD | se   | CGVHD | se   | Death | se   |
|-------------------|------|------|------|------|-------|------|-------|------|-------|------|
| 0                 | 0.75 | 0.11 | 0.02 | 0.02 | 0.06  | 0.06 | 0.09  | 0.09 | 0.09  | 0.05 |
| 1                 | 0.77 | 0.11 | 0.02 | 0.02 | 0.05  | 0.06 | 0.09  | 0.09 | 0.08  | 0.05 |
| 2                 | 0.8  | 0.11 | 0.01 | 0.02 | 0.01  | 0.03 | 0.1   | 0.1  | 0.07  | 0.05 |
| 3                 | 0.82 | 0.11 | 0.01 | 0.02 | 0     | 0    | 0.1   | 0.1  | 0.07  | 0.05 |
| 4                 | 0.86 | 0.11 | 0.01 | 0.01 | 0     | 0    | 0.09  | 0.1  | 0.05  | 0.05 |
| 5                 | 0.87 | 0.11 | 0.01 | 0.01 | 0     | 0    | 0.09  | 0.11 | 0.04  | 0.04 |
| 6                 | 0.9  | 0.11 | 0.01 | 0.01 | 0     | 0    | 0.07  | 0.1  | 0.03  | 0.04 |
| 7                 | 0.92 | 0.09 | 0.01 | 0.01 | 0     | 0    | 0.04  | 0.09 | 0.03  | 0.04 |
| 8                 | 0.93 | 0.09 | 0.01 | 0.01 | 0     | 0    | 0.04  | 0.09 | 0.03  | 0.04 |
| 9                 | 0.92 | 0.09 | 0.01 | 0.01 | 0     | 0    | 0.04  | 0.09 | 0.03  | 0.04 |
| 10                | 0.94 | 0.09 | 0.01 | 0.01 | 0     | 0    | 0.03  | 0.08 | 0.03  | 0.04 |
| 11                | 0.94 | 0.09 | 0.01 | 0.01 | 0     | 0    | 0.03  | 0.08 | 0.02  | 0.04 |
| 12                | 0.94 | 0.09 | 0    | 0.01 | 0     | 0    | 0.03  | 0.08 | 0.02  | 0.04 |

**age=40 years, timing allo <6 months, cmv=D-/R-, donor=MRD, graft=PBSC, TBI=no TBI, In vivo Tcell depletion=no,**

| Landmark time (y) | GRFS | se   | GF   | se   | AGVHD | se   | CGVHD | se   | Death | se   |
|-------------------|------|------|------|------|-------|------|-------|------|-------|------|
| 0                 | 0.66 | 0.14 | 0.02 | 0.02 | 0.09  | 0.08 | 0.12  | 0.11 | 0.12  | 0.07 |
| 1                 | 0.69 | 0.14 | 0.02 | 0.02 | 0.07  | 0.08 | 0.12  | 0.12 | 0.1   | 0.07 |
| 2                 | 0.72 | 0.15 | 0.01 | 0.02 | 0.01  | 0.04 | 0.15  | 0.14 | 0.1   | 0.07 |
| 3                 | 0.75 | 0.15 | 0.01 | 0.02 | 0     | 0    | 0.14  | 0.14 | 0.09  | 0.07 |
| 4                 | 0.8  | 0.16 | 0.01 | 0.02 | 0     | 0    | 0.13  | 0.15 | 0.07  | 0.07 |
| 5                 | 0.81 | 0.16 | 0.01 | 0.01 | 0     | 0    | 0.13  | 0.15 | 0.05  | 0.06 |
| 6                 | 0.85 | 0.15 | 0.01 | 0.01 | 0     | 0    | 0.09  | 0.14 | 0.05  | 0.06 |
| 7                 | 0.89 | 0.14 | 0.01 | 0.01 | 0     | 0    | 0.06  | 0.12 | 0.04  | 0.06 |
| 8                 | 0.89 | 0.13 | 0.01 | 0.02 | 0     | 0    | 0.06  | 0.12 | 0.04  | 0.06 |
| 9                 | 0.89 | 0.14 | 0.01 | 0.02 | 0     | 0    | 0.06  | 0.12 | 0.04  | 0.06 |
| 10                | 0.91 | 0.13 | 0.01 | 0.01 | 0     | 0    | 0.04  | 0.11 | 0.04  | 0.06 |
| 11                | 0.92 | 0.12 | 0.01 | 0.01 | 0     | 0    | 0.05  | 0.11 | 0.03  | 0.06 |
| 12                | 0.91 | 0.13 | 0    | 0.01 | 0     | 0    | 0.05  | 0.11 | 0.03  | 0.06 |

**age=50 years, timing allo <6 months, cmv=D-/R-, donor=MRD, graft=PBSC, TBI=no TBI, In vivo Tcell depletion=no,**

| Landmark time (y) | GRFS | se   | GF   | se   | AGVHD | se   | CGVHD | se   | Death | se   |
|-------------------|------|------|------|------|-------|------|-------|------|-------|------|
| 0                 | 0.55 | 0.17 | 0.02 | 0.02 | 0.12  | 0.11 | 0.16  | 0.15 | 0.16  | 0.09 |

|    |      |      |      |      |      |      |      |      |      |      |
|----|------|------|------|------|------|------|------|------|------|------|
| 1  | 0.58 | 0.18 | 0.02 | 0.02 | 0.1  | 0.11 | 0.17 | 0.16 | 0.14 | 0.09 |
| 2  | 0.63 | 0.2  | 0.01 | 0.02 | 0.02 | 0.06 | 0.2  | 0.19 | 0.14 | 0.1  |
| 3  | 0.66 | 0.2  | 0.01 | 0.02 | 0    | 0    | 0.2  | 0.2  | 0.13 | 0.1  |
| 4  | 0.72 | 0.21 | 0.01 | 0.02 | 0    | 0    | 0.18 | 0.21 | 0.09 | 0.09 |
| 5  | 0.74 | 0.22 | 0.01 | 0.02 | 0    | 0    | 0.18 | 0.21 | 0.07 | 0.09 |
| 6  | 0.79 | 0.21 | 0.01 | 0.02 | 0    | 0    | 0.13 | 0.21 | 0.07 | 0.09 |
| 7  | 0.85 | 0.2  | 0.01 | 0.02 | 0    | 0    | 0.08 | 0.18 | 0.06 | 0.09 |
| 8  | 0.85 | 0.2  | 0.01 | 0.02 | 0    | 0    | 0.08 | 0.18 | 0.06 | 0.08 |
| 9  | 0.85 | 0.2  | 0.01 | 0.02 | 0    | 0    | 0.08 | 0.18 | 0.06 | 0.09 |
| 10 | 0.87 | 0.18 | 0.01 | 0.02 | 0    | 0    | 0.07 | 0.17 | 0.05 | 0.08 |
| 11 | 0.88 | 0.18 | 0.01 | 0.02 | 0    | 0    | 0.07 | 0.17 | 0.05 | 0.08 |
| 12 | 0.88 | 0.18 | 0.01 | 0.02 | 0    | 0    | 0.07 | 0.17 | 0.05 | 0.08 |

**age=10 years, timing allo >6 months, cmv=others, donor=MRD, graft=PBSC, TBI=no TBI, In vivo Tcell depletion=no,**

| Landmark time (y) | GRFS | se   | GF   | se   | AGVHD | se   | CGVHD | se   | Death | se   |
|-------------------|------|------|------|------|-------|------|-------|------|-------|------|
| 0                 | 0.85 | 0.07 | 0.06 | 0.05 | 0.03  | 0.03 | 0.02  | 0.02 | 0.04  | 0.03 |
| 1                 | 0.86 | 0.07 | 0.06 | 0.06 | 0.03  | 0.03 | 0.02  | 0.02 | 0.04  | 0.03 |
| 2                 | 0.89 | 0.07 | 0.05 | 0.06 | 0     | 0.02 | 0.02  | 0.02 | 0.04  | 0.03 |
| 3                 | 0.9  | 0.06 | 0.05 | 0.06 | 0     | 0    | 0.02  | 0.02 | 0.03  | 0.03 |
| 4                 | 0.93 | 0.06 | 0.03 | 0.05 | 0     | 0    | 0.01  | 0.02 | 0.02  | 0.03 |
| 5                 | 0.94 | 0.05 | 0.03 | 0.05 | 0     | 0    | 0.01  | 0.02 | 0.02  | 0.02 |
| 6                 | 0.95 | 0.05 | 0.02 | 0.04 | 0     | 0    | 0.01  | 0.02 | 0.02  | 0.02 |
| 7                 | 0.96 | 0.05 | 0.02 | 0.04 | 0     | 0    | 0.01  | 0.02 | 0.01  | 0.02 |
| 8                 | 0.96 | 0.05 | 0.02 | 0.04 | 0     | 0    | 0.01  | 0.02 | 0.01  | 0.02 |
| 9                 | 0.96 | 0.05 | 0.02 | 0.05 | 0     | 0    | 0.01  | 0.02 | 0.01  | 0.02 |
| 10                | 0.96 | 0.05 | 0.02 | 0.04 | 0     | 0    | 0.01  | 0.01 | 0.01  | 0.02 |
| 11                | 0.96 | 0.05 | 0.02 | 0.04 | 0     | 0    | 0.01  | 0.01 | 0.01  | 0.02 |
| 12                | 0.97 | 0.05 | 0.02 | 0.04 | 0     | 0    | 0.01  | 0.01 | 0.01  | 0.02 |

**age=20 years, timing allo >6 months, cmv=others, donor=MRD, graft=PBSC, TBI=no TBI, In vivo Tcell depletion=no,**

| Landmark time (y) | GRFS | se   | GF   | se   | AGVHD | se   | CGVHD | se   | Death | se   |
|-------------------|------|------|------|------|-------|------|-------|------|-------|------|
| 0                 | 0.8  | 0.07 | 0.07 | 0.05 | 0.05  | 0.04 | 0.02  | 0.02 | 0.06  | 0.03 |
| 1                 | 0.82 | 0.08 | 0.07 | 0.06 | 0.04  | 0.04 | 0.02  | 0.02 | 0.05  | 0.03 |
| 2                 | 0.86 | 0.07 | 0.06 | 0.06 | 0.01  | 0.02 | 0.03  | 0.02 | 0.05  | 0.04 |
| 3                 | 0.88 | 0.07 | 0.06 | 0.06 | 0     | 0    | 0.02  | 0.03 | 0.04  | 0.04 |
| 4                 | 0.91 | 0.06 | 0.04 | 0.05 | 0     | 0    | 0.02  | 0.03 | 0.03  | 0.03 |
| 5                 | 0.92 | 0.06 | 0.03 | 0.05 | 0     | 0    | 0.02  | 0.03 | 0.03  | 0.03 |
| 6                 | 0.94 | 0.06 | 0.03 | 0.05 | 0     | 0    | 0.02  | 0.02 | 0.02  | 0.03 |
| 7                 | 0.94 | 0.06 | 0.03 | 0.05 | 0     | 0    | 0.01  | 0.02 | 0.02  | 0.03 |
| 8                 | 0.95 | 0.06 | 0.03 | 0.05 | 0     | 0    | 0.01  | 0.02 | 0.02  | 0.03 |
| 9                 | 0.94 | 0.06 | 0.03 | 0.05 | 0     | 0    | 0.01  | 0.02 | 0.02  | 0.03 |
| 10                | 0.95 | 0.06 | 0.02 | 0.05 | 0     | 0    | 0.01  | 0.02 | 0.02  | 0.03 |
| 11                | 0.95 | 0.05 | 0.02 | 0.05 | 0     | 0    | 0.01  | 0.02 | 0.02  | 0.03 |
| 12                | 0.96 | 0.05 | 0.02 | 0.04 | 0     | 0    | 0.01  | 0.02 | 0.02  | 0.03 |

**age=30 years, timing allo >6 months, cmv=others, donor=MRD, graft=PBSC, TBI=no TBI, In vivo Tcell depletion=no,**

| Landmark time (y) | GRFS | se   | GF   | se   | AGVHD | se   | CGVHD | se   | Death | se   |
|-------------------|------|------|------|------|-------|------|-------|------|-------|------|
| 0                 | 0.75 | 0.08 | 0.07 | 0.05 | 0.06  | 0.05 | 0.03  | 0.03 | 0.08  | 0.04 |
| 1                 | 0.77 | 0.08 | 0.07 | 0.06 | 0.05  | 0.05 | 0.03  | 0.03 | 0.07  | 0.04 |
| 2                 | 0.82 | 0.08 | 0.06 | 0.06 | 0.01  | 0.03 | 0.04  | 0.03 | 0.07  | 0.05 |
| 3                 | 0.84 | 0.08 | 0.06 | 0.06 | 0     | 0    | 0.03  | 0.03 | 0.06  | 0.05 |
| 4                 | 0.88 | 0.07 | 0.04 | 0.05 | 0     | 0    | 0.03  | 0.03 | 0.05  | 0.04 |
| 5                 | 0.9  | 0.07 | 0.03 | 0.05 | 0     | 0    | 0.03  | 0.03 | 0.04  | 0.04 |
| 6                 | 0.92 | 0.07 | 0.03 | 0.05 | 0     | 0    | 0.02  | 0.03 | 0.03  | 0.04 |
| 7                 | 0.93 | 0.06 | 0.03 | 0.05 | 0     | 0    | 0.01  | 0.03 | 0.03  | 0.04 |
| 8                 | 0.93 | 0.06 | 0.03 | 0.05 | 0     | 0    | 0.01  | 0.03 | 0.03  | 0.04 |
| 9                 | 0.93 | 0.07 | 0.03 | 0.05 | 0     | 0    | 0.01  | 0.03 | 0.03  | 0.04 |
| 10                | 0.94 | 0.06 | 0.03 | 0.05 | 0     | 0    | 0.01  | 0.02 | 0.03  | 0.04 |
| 11                | 0.94 | 0.06 | 0.03 | 0.05 | 0     | 0    | 0.01  | 0.02 | 0.02  | 0.03 |
| 12                | 0.94 | 0.06 | 0.02 | 0.04 | 0     | 0    | 0.01  | 0.02 | 0.02  | 0.04 |

**age=40 years, timing allo >6 months, cmv=others, donor=MRD, graft=PBSC, TBI=no TBI, In vivo Tcell depletion=no,**

| Landmark time (y) | GRFS | se   | GF   | se   | AGVHD | se   | CGVHD | se   | Death | se   |
|-------------------|------|------|------|------|-------|------|-------|------|-------|------|
| 0                 | 0.68 | 0.09 | 0.08 | 0.05 | 0.09  | 0.07 | 0.04  | 0.03 | 0.11  | 0.05 |
| 1                 | 0.71 | 0.1  | 0.08 | 0.06 | 0.07  | 0.07 | 0.04  | 0.04 | 0.1   | 0.06 |
| 2                 | 0.77 | 0.09 | 0.07 | 0.06 | 0.01  | 0.04 | 0.05  | 0.04 | 0.1   | 0.06 |
| 3                 | 0.79 | 0.09 | 0.07 | 0.06 | 0     | 0    | 0.05  | 0.04 | 0.09  | 0.06 |
| 4                 | 0.84 | 0.09 | 0.04 | 0.05 | 0     | 0    | 0.04  | 0.05 | 0.07  | 0.06 |
| 5                 | 0.87 | 0.08 | 0.04 | 0.05 | 0     | 0    | 0.05  | 0.05 | 0.05  | 0.05 |
| 6                 | 0.89 | 0.08 | 0.03 | 0.05 | 0     | 0    | 0.03  | 0.04 | 0.05  | 0.05 |
| 7                 | 0.9  | 0.08 | 0.03 | 0.05 | 0     | 0    | 0.02  | 0.04 | 0.04  | 0.05 |
| 8                 | 0.91 | 0.08 | 0.03 | 0.05 | 0     | 0    | 0.02  | 0.04 | 0.04  | 0.05 |
| 9                 | 0.91 | 0.08 | 0.03 | 0.05 | 0     | 0    | 0.02  | 0.04 | 0.04  | 0.05 |
| 10                | 0.92 | 0.08 | 0.03 | 0.05 | 0     | 0    | 0.02  | 0.03 | 0.04  | 0.05 |
| 11                | 0.92 | 0.07 | 0.03 | 0.05 | 0     | 0    | 0.02  | 0.03 | 0.03  | 0.05 |
| 12                | 0.93 | 0.07 | 0.02 | 0.05 | 0     | 0    | 0.02  | 0.03 | 0.03  | 0.05 |

**age=50 years, timing allo >6 months, cmv=others, donor=MRD, graft=PBSC, TBI=no TBI, In vivo Tcell depletion=no,**

| Landmark time (y) | GRFS | se   | GF   | se   | AGVHD | se   | CGVHD | se   | Death | se   |
|-------------------|------|------|------|------|-------|------|-------|------|-------|------|
| 0                 | 0.59 | 0.11 | 0.08 | 0.05 | 0.12  | 0.09 | 0.06  | 0.04 | 0.15  | 0.07 |
| 1                 | 0.63 | 0.11 | 0.08 | 0.06 | 0.1   | 0.09 | 0.06  | 0.05 | 0.14  | 0.07 |
| 2                 | 0.7  | 0.11 | 0.07 | 0.06 | 0.02  | 0.05 | 0.07  | 0.06 | 0.14  | 0.08 |
| 3                 | 0.73 | 0.11 | 0.07 | 0.06 | 0     | 0    | 0.07  | 0.06 | 0.12  | 0.08 |
| 4                 | 0.79 | 0.11 | 0.05 | 0.06 | 0     | 0    | 0.06  | 0.06 | 0.09  | 0.08 |
| 5                 | 0.82 | 0.1  | 0.04 | 0.05 | 0     | 0    | 0.07  | 0.06 | 0.07  | 0.07 |
| 6                 | 0.85 | 0.1  | 0.04 | 0.05 | 0     | 0    | 0.05  | 0.06 | 0.07  | 0.07 |
| 7                 | 0.87 | 0.1  | 0.04 | 0.05 | 0     | 0    | 0.03  | 0.05 | 0.06  | 0.07 |
| 8                 | 0.88 | 0.1  | 0.04 | 0.06 | 0     | 0    | 0.03  | 0.05 | 0.06  | 0.07 |

|    |      |      |      |      |   |   |      |      |      |      |
|----|------|------|------|------|---|---|------|------|------|------|
| 9  | 0.88 | 0.1  | 0.04 | 0.06 | 0 | 0 | 0.03 | 0.05 | 0.06 | 0.07 |
| 10 | 0.89 | 0.09 | 0.03 | 0.05 | 0 | 0 | 0.02 | 0.05 | 0.05 | 0.07 |
| 11 | 0.9  | 0.09 | 0.03 | 0.06 | 0 | 0 | 0.02 | 0.05 | 0.05 | 0.06 |
| 12 | 0.9  | 0.09 | 0.03 | 0.05 | 0 | 0 | 0.02 | 0.05 | 0.05 | 0.07 |

**age=10 years, timing allo <6 months, cmv=others, donor=MRD, graft=PBSC, TBI=no TBI, In vivo Tcell depletion=no,**

| Landmark time (y) | GRFS | se   | GF   | se   | AGVHD | se   | CGVHD | se   | Death | se   |
|-------------------|------|------|------|------|-------|------|-------|------|-------|------|
| 0                 | 0.81 | 0.07 | 0.06 | 0.04 | 0.06  | 0.05 | 0.03  | 0.03 | 0.04  | 0.02 |
| 1                 | 0.83 | 0.07 | 0.06 | 0.04 | 0.05  | 0.05 | 0.03  | 0.03 | 0.03  | 0.02 |
| 2                 | 0.87 | 0.07 | 0.05 | 0.04 | 0.01  | 0.03 | 0.04  | 0.04 | 0.03  | 0.02 |
| 3                 | 0.89 | 0.06 | 0.05 | 0.04 | 0     | 0    | 0.04  | 0.04 | 0.03  | 0.02 |
| 4                 | 0.92 | 0.06 | 0.03 | 0.04 | 0     | 0    | 0.03  | 0.04 | 0.02  | 0.02 |
| 5                 | 0.93 | 0.06 | 0.02 | 0.04 | 0     | 0    | 0.03  | 0.04 | 0.02  | 0.02 |
| 6                 | 0.94 | 0.05 | 0.02 | 0.04 | 0     | 0    | 0.02  | 0.04 | 0.01  | 0.02 |
| 7                 | 0.95 | 0.05 | 0.02 | 0.04 | 0     | 0    | 0.01  | 0.03 | 0.01  | 0.02 |
| 8                 | 0.95 | 0.05 | 0.02 | 0.04 | 0     | 0    | 0.01  | 0.03 | 0.01  | 0.02 |
| 9                 | 0.95 | 0.05 | 0.02 | 0.04 | 0     | 0    | 0.01  | 0.03 | 0.01  | 0.02 |
| 10                | 0.96 | 0.05 | 0.02 | 0.04 | 0     | 0    | 0.01  | 0.03 | 0.01  | 0.02 |
| 11                | 0.96 | 0.05 | 0.02 | 0.04 | 0     | 0    | 0.01  | 0.03 | 0.01  | 0.02 |
| 12                | 0.96 | 0.05 | 0.02 | 0.03 | 0     | 0    | 0.01  | 0.03 | 0.01  | 0.02 |

**age=20 years, timing allo <6 months, cmv=others, donor=MRD, graft=PBSC, TBI=no TBI, In vivo Tcell depletion=no,**

| Landmark time (y) | GRFS | se   | GF   | se   | AGVHD | se   | CGVHD | se   | Death | se   |
|-------------------|------|------|------|------|-------|------|-------|------|-------|------|
| 0                 | 0.76 | 0.09 | 0.06 | 0.04 | 0.08  | 0.07 | 0.05  | 0.04 | 0.05  | 0.03 |
| 1                 | 0.78 | 0.09 | 0.06 | 0.04 | 0.07  | 0.07 | 0.05  | 0.04 | 0.04  | 0.03 |
| 2                 | 0.84 | 0.08 | 0.05 | 0.05 | 0.01  | 0.04 | 0.06  | 0.05 | 0.04  | 0.03 |
| 3                 | 0.86 | 0.07 | 0.05 | 0.05 | 0     | 0    | 0.06  | 0.05 | 0.04  | 0.03 |
| 4                 | 0.89 | 0.07 | 0.03 | 0.04 | 0     | 0    | 0.05  | 0.05 | 0.03  | 0.03 |
| 5                 | 0.9  | 0.07 | 0.03 | 0.04 | 0     | 0    | 0.05  | 0.06 | 0.02  | 0.03 |
| 6                 | 0.92 | 0.07 | 0.02 | 0.04 | 0     | 0    | 0.04  | 0.05 | 0.02  | 0.03 |
| 7                 | 0.94 | 0.06 | 0.02 | 0.04 | 0     | 0    | 0.02  | 0.04 | 0.02  | 0.02 |
| 8                 | 0.94 | 0.06 | 0.02 | 0.04 | 0     | 0    | 0.02  | 0.04 | 0.02  | 0.02 |
| 9                 | 0.94 | 0.06 | 0.02 | 0.04 | 0     | 0    | 0.02  | 0.04 | 0.02  | 0.02 |
| 10                | 0.95 | 0.06 | 0.02 | 0.04 | 0     | 0    | 0.02  | 0.04 | 0.02  | 0.02 |
| 11                | 0.95 | 0.06 | 0.02 | 0.04 | 0     | 0    | 0.02  | 0.04 | 0.01  | 0.02 |
| 12                | 0.95 | 0.06 | 0.02 | 0.03 | 0     | 0    | 0.02  | 0.04 | 0.01  | 0.02 |

**age=30 years, timing allo <6 months, cmv=others, donor=MRD, graft=PBSC, TBI=no TBI, In vivo Tcell depletion=no,**

| Landmark time (y) | GRFS | se   | GF   | se   | AGVHD | se   | CGVHD | se   | Death | se   |
|-------------------|------|------|------|------|-------|------|-------|------|-------|------|
| 0                 | 0.69 | 0.1  | 0.06 | 0.04 | 0.12  | 0.08 | 0.06  | 0.06 | 0.07  | 0.04 |
| 1                 | 0.72 | 0.1  | 0.06 | 0.04 | 0.09  | 0.08 | 0.07  | 0.06 | 0.06  | 0.04 |
| 2                 | 0.78 | 0.1  | 0.05 | 0.05 | 0.02  | 0.05 | 0.08  | 0.07 | 0.06  | 0.04 |
| 3                 | 0.81 | 0.09 | 0.06 | 0.05 | 0     | 0    | 0.08  | 0.07 | 0.05  | 0.04 |
| 4                 | 0.85 | 0.09 | 0.04 | 0.04 | 0     | 0    | 0.07  | 0.07 | 0.04  | 0.04 |

|    |      |      |      |      |   |   |      |      |      |      |
|----|------|------|------|------|---|---|------|------|------|------|
| 5  | 0.87 | 0.09 | 0.03 | 0.04 | 0 | 0 | 0.07 | 0.08 | 0.03 | 0.04 |
| 6  | 0.89 | 0.09 | 0.03 | 0.04 | 0 | 0 | 0.05 | 0.07 | 0.03 | 0.03 |
| 7  | 0.92 | 0.08 | 0.03 | 0.04 | 0 | 0 | 0.03 | 0.06 | 0.03 | 0.03 |
| 8  | 0.92 | 0.08 | 0.03 | 0.04 | 0 | 0 | 0.03 | 0.06 | 0.02 | 0.03 |
| 9  | 0.92 | 0.08 | 0.03 | 0.04 | 0 | 0 | 0.03 | 0.06 | 0.02 | 0.03 |
| 10 | 0.93 | 0.07 | 0.02 | 0.04 | 0 | 0 | 0.02 | 0.05 | 0.02 | 0.03 |
| 11 | 0.93 | 0.07 | 0.02 | 0.04 | 0 | 0 | 0.02 | 0.05 | 0.02 | 0.03 |
| 12 | 0.94 | 0.07 | 0.02 | 0.04 | 0 | 0 | 0.02 | 0.06 | 0.02 | 0.03 |

**age=40 years, timing allo <6 months, cmv=others, donor=MRD, graft=PBSC, TBI=no TBI, In vivo Tcell depletion=no,**

| Landmark time (y) | GRFS | se   | GF   | se   | AGVHD | se   | CGVHD | se   | Death | se   |
|-------------------|------|------|------|------|-------|------|-------|------|-------|------|
| 0                 | 0.6  | 0.12 | 0.07 | 0.04 | 0.16  | 0.11 | 0.09  | 0.07 | 0.09  | 0.05 |
| 1                 | 0.63 | 0.12 | 0.07 | 0.05 | 0.13  | 0.11 | 0.09  | 0.08 | 0.08  | 0.05 |
| 2                 | 0.72 | 0.12 | 0.06 | 0.05 | 0.02  | 0.06 | 0.11  | 0.09 | 0.09  | 0.06 |
| 3                 | 0.75 | 0.12 | 0.06 | 0.05 | 0     | 0    | 0.11  | 0.1  | 0.08  | 0.06 |
| 4                 | 0.8  | 0.12 | 0.04 | 0.05 | 0     | 0    | 0.1   | 0.1  | 0.06  | 0.05 |
| 5                 | 0.82 | 0.12 | 0.03 | 0.04 | 0     | 0    | 0.1   | 0.1  | 0.04  | 0.05 |
| 6                 | 0.86 | 0.11 | 0.03 | 0.04 | 0     | 0    | 0.08  | 0.1  | 0.04  | 0.05 |
| 7                 | 0.89 | 0.1  | 0.03 | 0.04 | 0     | 0    | 0.05  | 0.08 | 0.04  | 0.05 |
| 8                 | 0.89 | 0.1  | 0.03 | 0.04 | 0     | 0    | 0.05  | 0.09 | 0.03  | 0.05 |
| 9                 | 0.89 | 0.1  | 0.03 | 0.05 | 0     | 0    | 0.05  | 0.09 | 0.03  | 0.05 |
| 10                | 0.91 | 0.1  | 0.03 | 0.04 | 0     | 0    | 0.04  | 0.08 | 0.03  | 0.05 |
| 11                | 0.91 | 0.1  | 0.03 | 0.04 | 0     | 0    | 0.04  | 0.08 | 0.03  | 0.04 |
| 12                | 0.91 | 0.1  | 0.02 | 0.04 | 0     | 0    | 0.04  | 0.08 | 0.03  | 0.04 |

**age=50 years, timing allo <6 months, cmv=others, donor=MRD, graft=PBSC, TBI=no TBI, In vivo Tcell depletion=no,**

| Landmark time (y) | GRFS | se   | GF   | se   | AGVHD | se   | CGVHD | se   | Death | se   |
|-------------------|------|------|------|------|-------|------|-------|------|-------|------|
| 0                 | 0.49 | 0.14 | 0.07 | 0.04 | 0.21  | 0.14 | 0.11  | 0.09 | 0.12  | 0.06 |
| 1                 | 0.53 | 0.15 | 0.07 | 0.05 | 0.17  | 0.15 | 0.12  | 0.1  | 0.11  | 0.06 |
| 2                 | 0.63 | 0.15 | 0.06 | 0.05 | 0.03  | 0.09 | 0.16  | 0.13 | 0.12  | 0.07 |
| 3                 | 0.67 | 0.15 | 0.07 | 0.06 | 0     | 0    | 0.16  | 0.14 | 0.11  | 0.08 |
| 4                 | 0.74 | 0.16 | 0.04 | 0.05 | 0     | 0    | 0.14  | 0.14 | 0.08  | 0.07 |
| 5                 | 0.76 | 0.16 | 0.03 | 0.05 | 0     | 0    | 0.15  | 0.15 | 0.06  | 0.07 |
| 6                 | 0.81 | 0.16 | 0.03 | 0.05 | 0     | 0    | 0.11  | 0.14 | 0.06  | 0.07 |
| 7                 | 0.85 | 0.14 | 0.03 | 0.05 | 0     | 0    | 0.07  | 0.12 | 0.05  | 0.07 |
| 8                 | 0.85 | 0.14 | 0.03 | 0.05 | 0     | 0    | 0.07  | 0.13 | 0.05  | 0.06 |
| 9                 | 0.85 | 0.14 | 0.03 | 0.05 | 0     | 0    | 0.07  | 0.13 | 0.05  | 0.07 |
| 10                | 0.87 | 0.14 | 0.03 | 0.05 | 0     | 0    | 0.05  | 0.12 | 0.05  | 0.06 |
| 11                | 0.88 | 0.14 | 0.03 | 0.05 | 0     | 0    | 0.05  | 0.12 | 0.04  | 0.06 |
| 12                | 0.88 | 0.14 | 0.02 | 0.05 | 0     | 0    | 0.05  | 0.12 | 0.04  | 0.06 |

**age=10 years, timing allo >6 months, cmv=D-/R-, donor=UD, graft=PBSC, TBI=no TBI, In vivo Tcell depletion=no,**

| Landmark time (y) | GRFS | se   | GF   | se   | AGVHD | se   | CGVHD | se   | Death | se   |
|-------------------|------|------|------|------|-------|------|-------|------|-------|------|
| 0                 | 0.76 | 0.12 | 0.01 | 0.01 | 0.13  | 0.12 | 0.02  | 0.02 | 0.09  | 0.05 |

|    |      |      |      |      |      |      |      |      |      |      |
|----|------|------|------|------|------|------|------|------|------|------|
| 1  | 0.79 | 0.12 | 0.01 | 0.01 | 0.1  | 0.12 | 0.02 | 0.02 | 0.08 | 0.05 |
| 2  | 0.87 | 0.09 | 0.01 | 0.01 | 0.02 | 0.07 | 0.02 | 0.03 | 0.08 | 0.06 |
| 3  | 0.9  | 0.06 | 0.01 | 0.01 | 0    | 0    | 0.02 | 0.03 | 0.07 | 0.06 |
| 4  | 0.92 | 0.06 | 0.01 | 0.01 | 0    | 0    | 0.02 | 0.03 | 0.05 | 0.05 |
| 5  | 0.93 | 0.06 | 0    | 0.01 | 0    | 0    | 0.02 | 0.03 | 0.04 | 0.05 |
| 6  | 0.95 | 0.05 | 0    | 0.01 | 0    | 0    | 0.01 | 0.02 | 0.04 | 0.05 |
| 7  | 0.95 | 0.05 | 0    | 0.01 | 0    | 0    | 0.01 | 0.02 | 0.03 | 0.05 |
| 8  | 0.96 | 0.05 | 0    | 0.01 | 0    | 0    | 0.01 | 0.02 | 0.03 | 0.04 |
| 9  | 0.96 | 0.05 | 0    | 0.01 | 0    | 0    | 0.01 | 0.02 | 0.03 | 0.05 |
| 10 | 0.96 | 0.05 | 0    | 0.01 | 0    | 0    | 0.01 | 0.02 | 0.03 | 0.04 |
| 11 | 0.96 | 0.05 | 0    | 0.01 | 0    | 0    | 0.01 | 0.02 | 0.02 | 0.04 |
| 12 | 0.96 | 0.05 | 0    | 0.01 | 0    | 0    | 0.01 | 0.02 | 0.03 | 0.04 |

**age=20 years, timing allo >6 months, cmv=D-/R-, donor=UD, graft=PBSC, TBI=no TBI, In vivo Tcell depletion=no,**

| Landmark time (y) | GRFS | se   | GF   | se   | AGVHD | se   | CGVHD | se   | Death | se   |
|-------------------|------|------|------|------|-------|------|-------|------|-------|------|
| 0                 | 0.68 | 0.13 | 0.01 | 0.01 | 0.17  | 0.14 | 0.02  | 0.03 | 0.12  | 0.06 |
| 1                 | 0.72 | 0.14 | 0.01 | 0.01 | 0.14  | 0.14 | 0.03  | 0.03 | 0.1   | 0.07 |
| 2                 | 0.82 | 0.11 | 0.01 | 0.01 | 0.03  | 0.08 | 0.03  | 0.03 | 0.11  | 0.07 |
| 3                 | 0.86 | 0.08 | 0.01 | 0.01 | 0     | 0    | 0.03  | 0.03 | 0.1   | 0.07 |
| 4                 | 0.89 | 0.08 | 0.01 | 0.01 | 0     | 0    | 0.03  | 0.03 | 0.07  | 0.07 |
| 5                 | 0.91 | 0.07 | 0.01 | 0.01 | 0     | 0    | 0.03  | 0.04 | 0.06  | 0.07 |
| 6                 | 0.92 | 0.07 | 0    | 0.01 | 0     | 0    | 0.02  | 0.03 | 0.05  | 0.06 |
| 7                 | 0.94 | 0.07 | 0    | 0.01 | 0     | 0    | 0.01  | 0.03 | 0.05  | 0.06 |
| 8                 | 0.94 | 0.07 | 0    | 0.01 | 0     | 0    | 0.01  | 0.03 | 0.04  | 0.06 |
| 9                 | 0.94 | 0.07 | 0.01 | 0.01 | 0     | 0    | 0.01  | 0.03 | 0.04  | 0.06 |
| 10                | 0.95 | 0.06 | 0    | 0.01 | 0     | 0    | 0.01  | 0.03 | 0.04  | 0.06 |
| 11                | 0.95 | 0.06 | 0    | 0.01 | 0     | 0    | 0.01  | 0.03 | 0.04  | 0.06 |
| 12                | 0.95 | 0.06 | 0    | 0.01 | 0     | 0    | 0.01  | 0.03 | 0.04  | 0.06 |

**age=30 years, timing allo >6 months, cmv=D-/R-, donor=UD, graft=PBSC, TBI=no TBI, In vivo Tcell depletion=no,**

| Landmark time (y) | GRFS | se   | GF   | se   | AGVHD | se   | CGVHD | se   | Death | se   |
|-------------------|------|------|------|------|-------|------|-------|------|-------|------|
| 0                 | 0.57 | 0.15 | 0.01 | 0.01 | 0.23  | 0.16 | 0.03  | 0.03 | 0.15  | 0.08 |
| 1                 | 0.63 | 0.16 | 0.01 | 0.01 | 0.19  | 0.17 | 0.03  | 0.03 | 0.14  | 0.08 |
| 2                 | 0.75 | 0.13 | 0.01 | 0.01 | 0.04  | 0.11 | 0.05  | 0.04 | 0.15  | 0.1  |
| 3                 | 0.8  | 0.1  | 0.01 | 0.02 | 0     | 0    | 0.05  | 0.05 | 0.14  | 0.1  |
| 4                 | 0.85 | 0.1  | 0.01 | 0.01 | 0     | 0    | 0.04  | 0.05 | 0.1   | 0.09 |
| 5                 | 0.87 | 0.1  | 0.01 | 0.01 | 0     | 0    | 0.04  | 0.05 | 0.08  | 0.09 |
| 6                 | 0.89 | 0.09 | 0.01 | 0.01 | 0     | 0    | 0.03  | 0.05 | 0.07  | 0.08 |
| 7                 | 0.91 | 0.09 | 0.01 | 0.01 | 0     | 0    | 0.02  | 0.04 | 0.07  | 0.08 |
| 8                 | 0.91 | 0.09 | 0.01 | 0.01 | 0     | 0    | 0.02  | 0.04 | 0.06  | 0.08 |
| 9                 | 0.91 | 0.09 | 0.01 | 0.01 | 0     | 0    | 0.02  | 0.04 | 0.06  | 0.08 |
| 10                | 0.92 | 0.09 | 0    | 0.01 | 0     | 0    | 0.01  | 0.03 | 0.06  | 0.08 |
| 11                | 0.93 | 0.08 | 0    | 0.01 | 0     | 0    | 0.01  | 0.03 | 0.05  | 0.08 |
| 12                | 0.93 | 0.09 | 0    | 0.01 | 0     | 0    | 0.01  | 0.04 | 0.05  | 0.08 |

**age=40 years, timing allo >6 months, cmv=D-/R-, donor=UD, graft=PBSC, TBI=no TBI, In vivo Tcell depletion=no,**

| Landmark time (y) | GRFS | se   | GF   | se   | AGVHD | se   | CGVHD | se   | Death | se   |
|-------------------|------|------|------|------|-------|------|-------|------|-------|------|
| 0                 | 0.45 | 0.16 | 0.01 | 0.01 | 0.3   | 0.19 | 0.04  | 0.04 | 0.2   | 0.09 |
| 1                 | 0.51 | 0.18 | 0.01 | 0.01 | 0.25  | 0.21 | 0.04  | 0.04 | 0.18  | 0.1  |
| 2                 | 0.66 | 0.16 | 0.01 | 0.02 | 0.05  | 0.14 | 0.06  | 0.06 | 0.21  | 0.13 |
| 3                 | 0.73 | 0.14 | 0.01 | 0.02 | 0     | 0    | 0.06  | 0.06 | 0.2   | 0.13 |
| 4                 | 0.79 | 0.14 | 0.01 | 0.02 | 0     | 0    | 0.06  | 0.06 | 0.15  | 0.12 |
| 5                 | 0.82 | 0.13 | 0.01 | 0.01 | 0     | 0    | 0.06  | 0.07 | 0.12  | 0.12 |
| 6                 | 0.85 | 0.13 | 0.01 | 0.01 | 0     | 0    | 0.04  | 0.06 | 0.1   | 0.11 |
| 7                 | 0.87 | 0.12 | 0.01 | 0.01 | 0     | 0    | 0.03  | 0.05 | 0.1   | 0.11 |
| 8                 | 0.88 | 0.12 | 0.01 | 0.01 | 0     | 0    | 0.03  | 0.05 | 0.09  | 0.11 |
| 9                 | 0.88 | 0.12 | 0.01 | 0.02 | 0     | 0    | 0.03  | 0.05 | 0.09  | 0.11 |
| 10                | 0.89 | 0.12 | 0.01 | 0.01 | 0     | 0    | 0.02  | 0.05 | 0.08  | 0.11 |
| 11                | 0.9  | 0.11 | 0.01 | 0.01 | 0     | 0    | 0.02  | 0.05 | 0.07  | 0.11 |
| 12                | 0.9  | 0.12 | 0    | 0.01 | 0     | 0    | 0.02  | 0.05 | 0.08  | 0.11 |

**age=50 years, timing allo >6 months, cmv=D-/R-, donor=UD, graft=PBSC, TBI=no TBI, In vivo Tcell depletion=no,**

| Landmark time (y) | GRFS | se   | GF   | se   | AGVHD | se   | CGVHD | se   | Death | se   |
|-------------------|------|------|------|------|-------|------|-------|------|-------|------|
| 0                 | 0.32 | 0.16 | 0.01 | 0.01 | 0.39  | 0.23 | 0.04  | 0.04 | 0.24  | 0.11 |
| 1                 | 0.38 | 0.19 | 0.01 | 0.01 | 0.34  | 0.26 | 0.05  | 0.05 | 0.22  | 0.13 |
| 2                 | 0.55 | 0.19 | 0.01 | 0.02 | 0.07  | 0.19 | 0.08  | 0.08 | 0.28  | 0.16 |
| 3                 | 0.63 | 0.17 | 0.01 | 0.02 | 0     | 0    | 0.09  | 0.08 | 0.27  | 0.17 |
| 4                 | 0.71 | 0.18 | 0.01 | 0.02 | 0     | 0    | 0.08  | 0.09 | 0.2   | 0.17 |
| 5                 | 0.75 | 0.18 | 0.01 | 0.02 | 0     | 0    | 0.09  | 0.1  | 0.16  | 0.16 |
| 6                 | 0.79 | 0.17 | 0.01 | 0.02 | 0     | 0    | 0.06  | 0.09 | 0.14  | 0.16 |
| 7                 | 0.82 | 0.17 | 0.01 | 0.02 | 0     | 0    | 0.04  | 0.08 | 0.14  | 0.16 |
| 8                 | 0.83 | 0.17 | 0.01 | 0.02 | 0     | 0    | 0.04  | 0.08 | 0.12  | 0.15 |
| 9                 | 0.83 | 0.17 | 0.01 | 0.02 | 0     | 0    | 0.04  | 0.08 | 0.13  | 0.16 |
| 10                | 0.85 | 0.17 | 0.01 | 0.02 | 0     | 0    | 0.03  | 0.07 | 0.12  | 0.15 |
| 11                | 0.86 | 0.16 | 0.01 | 0.02 | 0     | 0    | 0.03  | 0.07 | 0.1   | 0.15 |
| 12                | 0.86 | 0.17 | 0    | 0.01 | 0     | 0    | 0.03  | 0.07 | 0.11  | 0.15 |

**age=10 years, timing allo <6 months, cmv=D-/R-, donor=UD, graft=PBSC, TBI=no TBI, In vivo Tcell depletion=no,**

| Landmark time (y) | GRFS | se   | GF   | se   | AGVHD | se   | CGVHD | se   | Death | se   |
|-------------------|------|------|------|------|-------|------|-------|------|-------|------|
| 0                 | 0.66 | 0.18 | 0.01 | 0.01 | 0.23  | 0.2  | 0.04  | 0.04 | 0.07  | 0.04 |
| 1                 | 0.71 | 0.19 | 0.01 | 0.01 | 0.18  | 0.2  | 0.04  | 0.04 | 0.06  | 0.05 |
| 2                 | 0.84 | 0.13 | 0.01 | 0.01 | 0.04  | 0.13 | 0.05  | 0.06 | 0.07  | 0.05 |
| 3                 | 0.88 | 0.08 | 0.01 | 0.01 | 0     | 0    | 0.05  | 0.06 | 0.06  | 0.05 |
| 4                 | 0.91 | 0.07 | 0.01 | 0.01 | 0     | 0    | 0.04  | 0.06 | 0.04  | 0.05 |
| 5                 | 0.92 | 0.07 | 0    | 0.01 | 0     | 0    | 0.05  | 0.06 | 0.03  | 0.04 |
| 6                 | 0.93 | 0.07 | 0    | 0.01 | 0     | 0    | 0.03  | 0.05 | 0.03  | 0.04 |
| 7                 | 0.95 | 0.06 | 0    | 0.01 | 0     | 0    | 0.02  | 0.05 | 0.03  | 0.04 |
| 8                 | 0.95 | 0.06 | 0    | 0.01 | 0     | 0    | 0.02  | 0.05 | 0.03  | 0.04 |



|    |      |      |   |      |   |   |      |      |      |      |
|----|------|------|---|------|---|---|------|------|------|------|
| 9  | 0.95 | 0.06 | 0 | 0.01 | 0 | 0 | 0.02 | 0.05 | 0.03 | 0.04 |
| 10 | 0.96 | 0.06 | 0 | 0.01 | 0 | 0 | 0.02 | 0.04 | 0.02 | 0.04 |
| 11 | 0.96 | 0.06 | 0 | 0.01 | 0 | 0 | 0.02 | 0.04 | 0.02 | 0.04 |
| 12 | 0.96 | 0.06 | 0 | 0.01 | 0 | 0 | 0.02 | 0.04 | 0.02 | 0.04 |

**age=20 years, timing allo <6 months, cmv=D-/R-, donor=UD, graft=PBSC, TBI=no TBI, In vivo Tcell depletion=no,**

| Landmark time (y) | GRFS | se   | GF   | se   | AGVHD | se   | CGVHD | se   | Death | se   |
|-------------------|------|------|------|------|-------|------|-------|------|-------|------|
| 0                 | 0.55 | 0.2  | 0.01 | 0.01 | 0.3   | 0.24 | 0.05  | 0.05 | 0.09  | 0.05 |
| 1                 | 0.61 | 0.22 | 0.01 | 0.01 | 0.25  | 0.25 | 0.05  | 0.06 | 0.08  | 0.06 |
| 2                 | 0.77 | 0.17 | 0.01 | 0.01 | 0.05  | 0.17 | 0.07  | 0.07 | 0.09  | 0.07 |
| 3                 | 0.83 | 0.1  | 0.01 | 0.01 | 0     | 0    | 0.07  | 0.08 | 0.09  | 0.07 |
| 4                 | 0.87 | 0.1  | 0.01 | 0.01 | 0     | 0    | 0.06  | 0.08 | 0.06  | 0.07 |
| 5                 | 0.88 | 0.1  | 0    | 0.01 | 0     | 0    | 0.07  | 0.08 | 0.05  | 0.06 |
| 6                 | 0.9  | 0.09 | 0    | 0.01 | 0     | 0    | 0.05  | 0.08 | 0.04  | 0.06 |
| 7                 | 0.93 | 0.09 | 0    | 0.01 | 0     | 0    | 0.03  | 0.06 | 0.04  | 0.06 |
| 8                 | 0.93 | 0.08 | 0    | 0.01 | 0     | 0    | 0.03  | 0.06 | 0.04  | 0.06 |
| 9                 | 0.93 | 0.09 | 0    | 0.01 | 0     | 0    | 0.03  | 0.06 | 0.04  | 0.06 |
| 10                | 0.94 | 0.08 | 0    | 0.01 | 0     | 0    | 0.02  | 0.06 | 0.03  | 0.06 |
| 11                | 0.94 | 0.08 | 0    | 0.01 | 0     | 0    | 0.02  | 0.06 | 0.03  | 0.05 |
| 12                | 0.94 | 0.08 | 0    | 0.01 | 0     | 0    | 0.02  | 0.06 | 0.03  | 0.05 |

**age=30 years, timing allo <6 months, cmv=D-/R-, donor=UD, graft=PBSC, TBI=no TBI, In vivo Tcell depletion=no,**

| Landmark time (y) | GRFS | se   | GF   | se   | AGVHD | se   | CGVHD | se   | Death | se   |
|-------------------|------|------|------|------|-------|------|-------|------|-------|------|
| 0                 | 0.43 | 0.22 | 0.01 | 0.01 | 0.39  | 0.28 | 0.06  | 0.06 | 0.11  | 0.07 |
| 1                 | 0.5  | 0.25 | 0.01 | 0.01 | 0.33  | 0.31 | 0.06  | 0.07 | 0.1   | 0.08 |
| 2                 | 0.69 | 0.21 | 0.01 | 0.01 | 0.07  | 0.22 | 0.1   | 0.1  | 0.13  | 0.09 |
| 3                 | 0.77 | 0.14 | 0.01 | 0.01 | 0     | 0    | 0.1   | 0.11 | 0.12  | 0.1  |
| 4                 | 0.81 | 0.14 | 0.01 | 0.01 | 0     | 0    | 0.09  | 0.11 | 0.09  | 0.09 |
| 5                 | 0.83 | 0.13 | 0.01 | 0.01 | 0     | 0    | 0.09  | 0.11 | 0.07  | 0.08 |
| 6                 | 0.86 | 0.13 | 0    | 0.01 | 0     | 0    | 0.07  | 0.11 | 0.06  | 0.08 |
| 7                 | 0.89 | 0.12 | 0    | 0.01 | 0     | 0    | 0.04  | 0.09 | 0.06  | 0.08 |
| 8                 | 0.9  | 0.12 | 0.01 | 0.01 | 0     | 0    | 0.04  | 0.09 | 0.05  | 0.08 |
| 9                 | 0.9  | 0.12 | 0.01 | 0.01 | 0     | 0    | 0.04  | 0.09 | 0.05  | 0.08 |
| 10                | 0.91 | 0.11 | 0    | 0.01 | 0     | 0    | 0.03  | 0.08 | 0.05  | 0.08 |
| 11                | 0.92 | 0.11 | 0    | 0.01 | 0     | 0    | 0.03  | 0.08 | 0.04  | 0.07 |
| 12                | 0.92 | 0.11 | 0    | 0.01 | 0     | 0    | 0.03  | 0.08 | 0.05  | 0.08 |

**age=40 years, timing allo <6 months, cmv=D-/R-, donor=UD, graft=PBSC, TBI=no TBI, In vivo Tcell depletion=no,**

| Landmark time (y) | GRFS | se   | GF   | se   | AGVHD | se   | CGVHD | se   | Death | se   |
|-------------------|------|------|------|------|-------|------|-------|------|-------|------|
| 0                 | 0.3  | 0.22 | 0.01 | 0.01 | 0.5   | 0.31 | 0.06  | 0.07 | 0.13  | 0.09 |
| 1                 | 0.37 | 0.26 | 0.01 | 0.01 | 0.43  | 0.37 | 0.07  | 0.09 | 0.12  | 0.1  |
| 2                 | 0.59 | 0.26 | 0.01 | 0.01 | 0.1   | 0.31 | 0.13  | 0.13 | 0.17  | 0.13 |
| 3                 | 0.68 | 0.18 | 0.01 | 0.02 | 0     | 0    | 0.14  | 0.14 | 0.17  | 0.13 |
| 4                 | 0.74 | 0.18 | 0.01 | 0.01 | 0     | 0    | 0.13  | 0.15 | 0.12  | 0.12 |

|    |      |      |      |      |   |   |      |      |      |      |
|----|------|------|------|------|---|---|------|------|------|------|
| 5  | 0.76 | 0.18 | 0.01 | 0.01 | 0 | 0 | 0.13 | 0.16 | 0.1  | 0.12 |
| 6  | 0.81 | 0.18 | 0.01 | 0.01 | 0 | 0 | 0.1  | 0.15 | 0.09 | 0.11 |
| 7  | 0.85 | 0.17 | 0.01 | 0.01 | 0 | 0 | 0.06 | 0.13 | 0.08 | 0.11 |
| 8  | 0.86 | 0.17 | 0.01 | 0.01 | 0 | 0 | 0.06 | 0.13 | 0.08 | 0.11 |
| 9  | 0.86 | 0.17 | 0.01 | 0.01 | 0 | 0 | 0.06 | 0.13 | 0.08 | 0.11 |
| 10 | 0.88 | 0.16 | 0    | 0.01 | 0 | 0 | 0.05 | 0.12 | 0.07 | 0.11 |
| 11 | 0.88 | 0.16 | 0    | 0.01 | 0 | 0 | 0.05 | 0.12 | 0.06 | 0.11 |
| 12 | 0.88 | 0.16 | 0    | 0.01 | 0 | 0 | 0.05 | 0.12 | 0.06 | 0.11 |

**age=50 years, timing allo <6 months, cmv=D-/R-, donor=UD, graft=PBSC, TBI=no TBI, In vivo Tcell depletion=no,**

| Landmark time (y) | GRFS | se   | GF   | se   | AGVHD | se   | CGVHD | se   | Death | se   |
|-------------------|------|------|------|------|-------|------|-------|------|-------|------|
| 0                 | 0.18 | 0.19 | 0.01 | 0.01 | 0.61  | 0.33 | 0.06  | 0.08 | 0.14  | 0.11 |
| 1                 | 0.24 | 0.25 | 0.01 | 0.01 | 0.55  | 0.42 | 0.08  | 0.11 | 0.13  | 0.13 |
| 2                 | 0.46 | 0.3  | 0.01 | 0.01 | 0.13  | 0.43 | 0.17  | 0.18 | 0.22  | 0.18 |
| 3                 | 0.57 | 0.23 | 0.01 | 0.02 | 0     | 0    | 0.19  | 0.19 | 0.22  | 0.17 |
| 4                 | 0.65 | 0.24 | 0.01 | 0.02 | 0     | 0    | 0.18  | 0.21 | 0.17  | 0.17 |
| 5                 | 0.67 | 0.25 | 0.01 | 0.01 | 0     | 0    | 0.19  | 0.22 | 0.13  | 0.16 |
| 6                 | 0.73 | 0.25 | 0.01 | 0.01 | 0     | 0    | 0.14  | 0.22 | 0.12  | 0.16 |
| 7                 | 0.79 | 0.24 | 0.01 | 0.02 | 0     | 0    | 0.09  | 0.19 | 0.12  | 0.16 |
| 8                 | 0.8  | 0.24 | 0.01 | 0.02 | 0     | 0    | 0.09  | 0.19 | 0.11  | 0.16 |
| 9                 | 0.8  | 0.24 | 0.01 | 0.02 | 0     | 0    | 0.09  | 0.2  | 0.11  | 0.16 |
| 10                | 0.83 | 0.23 | 0.01 | 0.02 | 0     | 0    | 0.07  | 0.18 | 0.1   | 0.16 |
| 11                | 0.84 | 0.23 | 0.01 | 0.02 | 0     | 0    | 0.07  | 0.18 | 0.09  | 0.15 |
| 12                | 0.83 | 0.23 | 0    | 0.01 | 0     | 0    | 0.07  | 0.18 | 0.09  | 0.16 |

**age=10 years, timing allo >6 months, cmv=others, donor=UD, graft=PBSC, TBI=no TBI, In vivo Tcell depletion=no,**

| Landmark time (y) | GRFS | se   | GF   | se   | AGVHD | se   | CGVHD | se   | Death | se   |
|-------------------|------|------|------|------|-------|------|-------|------|-------|------|
| 0                 | 0.65 | 0.2  | 0.04 | 0.04 | 0.23  | 0.22 | 0.01  | 0.01 | 0.06  | 0.04 |
| 1                 | 0.7  | 0.21 | 0.04 | 0.04 | 0.18  | 0.23 | 0.01  | 0.02 | 0.06  | 0.04 |
| 2                 | 0.84 | 0.14 | 0.04 | 0.05 | 0.04  | 0.14 | 0.02  | 0.02 | 0.06  | 0.05 |
| 3                 | 0.88 | 0.07 | 0.04 | 0.05 | 0     | 0    | 0.02  | 0.02 | 0.06  | 0.05 |
| 4                 | 0.91 | 0.06 | 0.03 | 0.04 | 0     | 0    | 0.02  | 0.02 | 0.04  | 0.05 |
| 5                 | 0.93 | 0.06 | 0.02 | 0.04 | 0     | 0    | 0.02  | 0.02 | 0.03  | 0.04 |
| 6                 | 0.94 | 0.06 | 0.02 | 0.04 | 0     | 0    | 0.01  | 0.02 | 0.03  | 0.04 |
| 7                 | 0.95 | 0.06 | 0.02 | 0.04 | 0     | 0    | 0.01  | 0.02 | 0.03  | 0.04 |
| 8                 | 0.95 | 0.06 | 0.02 | 0.04 | 0     | 0    | 0.01  | 0.02 | 0.02  | 0.04 |
| 9                 | 0.95 | 0.06 | 0.02 | 0.04 | 0     | 0    | 0.01  | 0.02 | 0.03  | 0.04 |
| 10                | 0.95 | 0.06 | 0.02 | 0.04 | 0     | 0    | 0.01  | 0.02 | 0.02  | 0.04 |
| 11                | 0.96 | 0.05 | 0.02 | 0.04 | 0     | 0    | 0.01  | 0.02 | 0.02  | 0.04 |
| 12                | 0.96 | 0.05 | 0.01 | 0.04 | 0     | 0    | 0.01  | 0.02 | 0.02  | 0.04 |

**age=20 years, timing allo >6 months, cmv=others, donor=UD, graft=PBSC, TBI=no TBI, In vivo Tcell depletion=no,**

| Landmark time (y) | GRFS | se   | GF   | se   | AGVHD | se   | CGVHD | se   | Death | se   |
|-------------------|------|------|------|------|-------|------|-------|------|-------|------|
| 0                 | 0.55 | 0.21 | 0.04 | 0.04 | 0.3   | 0.25 | 0.02  | 0.02 | 0.08  | 0.05 |

|    |      |      |      |      |      |      |      |      |      |      |
|----|------|------|------|------|------|------|------|------|------|------|
| 1  | 0.61 | 0.23 | 0.05 | 0.04 | 0.25 | 0.27 | 0.02 | 0.02 | 0.08 | 0.05 |
| 2  | 0.79 | 0.17 | 0.04 | 0.05 | 0.05 | 0.18 | 0.03 | 0.03 | 0.09 | 0.06 |
| 3  | 0.85 | 0.08 | 0.05 | 0.05 | 0    | 0    | 0.03 | 0.03 | 0.08 | 0.06 |
| 4  | 0.89 | 0.08 | 0.03 | 0.04 | 0    | 0    | 0.02 | 0.03 | 0.06 | 0.06 |
| 5  | 0.9  | 0.07 | 0.02 | 0.04 | 0    | 0    | 0.02 | 0.03 | 0.05 | 0.06 |
| 6  | 0.92 | 0.07 | 0.02 | 0.04 | 0    | 0    | 0.02 | 0.03 | 0.04 | 0.05 |
| 7  | 0.93 | 0.07 | 0.02 | 0.04 | 0    | 0    | 0.01 | 0.02 | 0.04 | 0.05 |
| 8  | 0.93 | 0.07 | 0.02 | 0.04 | 0    | 0    | 0.01 | 0.02 | 0.04 | 0.05 |
| 9  | 0.93 | 0.07 | 0.02 | 0.04 | 0    | 0    | 0.01 | 0.02 | 0.04 | 0.05 |
| 10 | 0.94 | 0.07 | 0.02 | 0.04 | 0    | 0    | 0.01 | 0.02 | 0.03 | 0.05 |
| 11 | 0.94 | 0.06 | 0.02 | 0.04 | 0    | 0    | 0.01 | 0.02 | 0.03 | 0.05 |
| 12 | 0.95 | 0.06 | 0.02 | 0.04 | 0    | 0    | 0.01 | 0.02 | 0.03 | 0.05 |

**age=30 years, timing allo >6 months, cmv=others, donor=UD, graft=PBSC, TBI=no TBI, In vivo Tcell depletion=no,**

| Landmark time (y) | GRFS | se   | GF   | se   | AGVHD | se   | CGVHD | se   | Death | se   |
|-------------------|------|------|------|------|-------|------|-------|------|-------|------|
| 0                 | 0.44 | 0.22 | 0.04 | 0.03 | 0.39  | 0.27 | 0.02  | 0.02 | 0.11  | 0.06 |
| 1                 | 0.51 | 0.24 | 0.05 | 0.04 | 0.33  | 0.3  | 0.02  | 0.02 | 0.1   | 0.07 |
| 2                 | 0.72 | 0.2  | 0.05 | 0.05 | 0.07  | 0.22 | 0.04  | 0.03 | 0.12  | 0.08 |
| 3                 | 0.8  | 0.1  | 0.05 | 0.05 | 0     | 0    | 0.04  | 0.04 | 0.12  | 0.08 |
| 4                 | 0.85 | 0.1  | 0.03 | 0.05 | 0     | 0    | 0.03  | 0.04 | 0.09  | 0.08 |
| 5                 | 0.87 | 0.09 | 0.03 | 0.04 | 0     | 0    | 0.03  | 0.04 | 0.07  | 0.07 |
| 6                 | 0.89 | 0.09 | 0.02 | 0.04 | 0     | 0    | 0.02  | 0.04 | 0.06  | 0.07 |
| 7                 | 0.9  | 0.09 | 0.02 | 0.04 | 0     | 0    | 0.01  | 0.03 | 0.06  | 0.07 |
| 8                 | 0.91 | 0.08 | 0.02 | 0.04 | 0     | 0    | 0.01  | 0.03 | 0.05  | 0.07 |
| 9                 | 0.91 | 0.09 | 0.03 | 0.05 | 0     | 0    | 0.01  | 0.03 | 0.05  | 0.07 |
| 10                | 0.92 | 0.08 | 0.02 | 0.04 | 0     | 0    | 0.01  | 0.03 | 0.05  | 0.07 |
| 11                | 0.92 | 0.08 | 0.02 | 0.04 | 0     | 0    | 0.01  | 0.03 | 0.04  | 0.06 |
| 12                | 0.93 | 0.08 | 0.02 | 0.04 | 0     | 0    | 0.01  | 0.03 | 0.04  | 0.07 |

**age=40 years, timing allo >6 months, cmv=others, donor=UD, graft=PBSC, TBI=no TBI, In vivo Tcell depletion=no,**

| Landmark time (y) | GRFS | se   | GF   | se   | AGVHD | se   | CGVHD | se   | Death | se   |
|-------------------|------|------|------|------|-------|------|-------|------|-------|------|
| 0                 | 0.32 | 0.21 | 0.04 | 0.03 | 0.5   | 0.28 | 0.02  | 0.02 | 0.12  | 0.07 |
| 1                 | 0.39 | 0.25 | 0.04 | 0.04 | 0.43  | 0.34 | 0.03  | 0.03 | 0.11  | 0.09 |
| 2                 | 0.64 | 0.23 | 0.05 | 0.05 | 0.1   | 0.29 | 0.05  | 0.04 | 0.17  | 0.11 |
| 3                 | 0.73 | 0.12 | 0.06 | 0.05 | 0     | 0    | 0.05  | 0.05 | 0.16  | 0.11 |
| 4                 | 0.79 | 0.12 | 0.04 | 0.05 | 0     | 0    | 0.05  | 0.05 | 0.12  | 0.11 |
| 5                 | 0.82 | 0.12 | 0.03 | 0.05 | 0     | 0    | 0.05  | 0.05 | 0.1   | 0.1  |
| 6                 | 0.85 | 0.11 | 0.03 | 0.05 | 0     | 0    | 0.04  | 0.05 | 0.09  | 0.1  |
| 7                 | 0.87 | 0.11 | 0.03 | 0.05 | 0     | 0    | 0.02  | 0.04 | 0.08  | 0.1  |
| 8                 | 0.88 | 0.11 | 0.03 | 0.05 | 0     | 0    | 0.02  | 0.04 | 0.07  | 0.09 |
| 9                 | 0.87 | 0.11 | 0.03 | 0.05 | 0     | 0    | 0.02  | 0.04 | 0.08  | 0.09 |
| 10                | 0.89 | 0.11 | 0.02 | 0.05 | 0     | 0    | 0.02  | 0.04 | 0.07  | 0.09 |
| 11                | 0.9  | 0.1  | 0.02 | 0.05 | 0     | 0    | 0.02  | 0.04 | 0.06  | 0.09 |
| 12                | 0.9  | 0.11 | 0.02 | 0.04 | 0     | 0    | 0.02  | 0.04 | 0.06  | 0.09 |

**age=50 years, timing allo >6 months, cmv=others, donor=UD, graft=PBSC, TBI=no TBI, In vivo Tcell depletion=no,**

| Landmark time (y) | GRFS | se   | GF   | se   | AGVHD | se   | CGVHD | se   | Death | se   |
|-------------------|------|------|------|------|-------|------|-------|------|-------|------|
| 0                 | 0.2  | 0.18 | 0.03 | 0.03 | 0.61  | 0.28 | 0.02  | 0.03 | 0.14  | 0.09 |
| 1                 | 0.26 | 0.23 | 0.04 | 0.03 | 0.55  | 0.36 | 0.03  | 0.03 | 0.13  | 0.11 |
| 2                 | 0.53 | 0.26 | 0.05 | 0.05 | 0.14  | 0.37 | 0.06  | 0.06 | 0.22  | 0.15 |
| 3                 | 0.65 | 0.15 | 0.06 | 0.06 | 0     | 0    | 0.07  | 0.06 | 0.22  | 0.14 |
| 4                 | 0.72 | 0.15 | 0.04 | 0.05 | 0     | 0    | 0.07  | 0.07 | 0.17  | 0.14 |
| 5                 | 0.76 | 0.15 | 0.03 | 0.05 | 0     | 0    | 0.07  | 0.07 | 0.14  | 0.13 |
| 6                 | 0.8  | 0.15 | 0.03 | 0.05 | 0     | 0    | 0.05  | 0.07 | 0.12  | 0.13 |
| 7                 | 0.83 | 0.15 | 0.03 | 0.05 | 0     | 0    | 0.03  | 0.06 | 0.11  | 0.13 |
| 8                 | 0.84 | 0.14 | 0.03 | 0.05 | 0     | 0    | 0.03  | 0.06 | 0.1   | 0.13 |
| 9                 | 0.83 | 0.15 | 0.03 | 0.06 | 0     | 0    | 0.03  | 0.06 | 0.11  | 0.13 |
| 10                | 0.85 | 0.14 | 0.03 | 0.05 | 0     | 0    | 0.02  | 0.05 | 0.1   | 0.13 |
| 11                | 0.86 | 0.14 | 0.03 | 0.05 | 0     | 0    | 0.02  | 0.05 | 0.09  | 0.12 |
| 12                | 0.86 | 0.14 | 0.02 | 0.05 | 0     | 0    | 0.02  | 0.06 | 0.09  | 0.13 |

**age=10 years, timing allo <6 months, cmv=others, donor=UD, graft=PBSC, TBI=no TBI, In vivo Tcell depletion=no,**

| Landmark time (y) | GRFS | se   | GF   | se   | AGVHD | se   | CGVHD | se   | Death | se   |
|-------------------|------|------|------|------|-------|------|-------|------|-------|------|
| 0                 | 0.51 | 0.27 | 0.03 | 0.03 | 0.39  | 0.31 | 0.02  | 0.03 | 0.05  | 0.03 |
| 1                 | 0.57 | 0.3  | 0.03 | 0.03 | 0.32  | 0.34 | 0.03  | 0.03 | 0.04  | 0.04 |
| 2                 | 0.8  | 0.22 | 0.04 | 0.04 | 0.07  | 0.25 | 0.04  | 0.04 | 0.05  | 0.04 |
| 3                 | 0.87 | 0.07 | 0.04 | 0.04 | 0     | 0    | 0.04  | 0.05 | 0.05  | 0.04 |
| 4                 | 0.9  | 0.07 | 0.03 | 0.04 | 0     | 0    | 0.04  | 0.05 | 0.04  | 0.04 |
| 5                 | 0.91 | 0.07 | 0.02 | 0.03 | 0     | 0    | 0.04  | 0.05 | 0.03  | 0.04 |
| 6                 | 0.93 | 0.06 | 0.02 | 0.03 | 0     | 0    | 0.03  | 0.04 | 0.03  | 0.04 |
| 7                 | 0.94 | 0.06 | 0.02 | 0.03 | 0     | 0    | 0.02  | 0.04 | 0.02  | 0.04 |
| 8                 | 0.94 | 0.06 | 0.02 | 0.03 | 0     | 0    | 0.02  | 0.04 | 0.02  | 0.03 |
| 9                 | 0.94 | 0.06 | 0.02 | 0.04 | 0     | 0    | 0.02  | 0.04 | 0.02  | 0.04 |
| 10                | 0.95 | 0.06 | 0.02 | 0.03 | 0     | 0    | 0.01  | 0.03 | 0.02  | 0.03 |
| 11                | 0.95 | 0.06 | 0.02 | 0.03 | 0     | 0    | 0.01  | 0.03 | 0.02  | 0.03 |
| 12                | 0.96 | 0.06 | 0.01 | 0.03 | 0     | 0    | 0.01  | 0.03 | 0.02  | 0.03 |

**age=20 years, timing allo <6 months, cmv=others, donor=UD, graft=PBSC, TBI=no TBI, In vivo Tcell depletion=no,**

| Landmark time (y) | GRFS | se   | GF   | se   | AGVHD | se   | CGVHD | se   | Death | se   |
|-------------------|------|------|------|------|-------|------|-------|------|-------|------|
| 0                 | 0.39 | 0.27 | 0.03 | 0.03 | 0.5   | 0.33 | 0.03  | 0.03 | 0.06  | 0.04 |
| 1                 | 0.46 | 0.32 | 0.03 | 0.03 | 0.42  | 0.38 | 0.03  | 0.04 | 0.05  | 0.05 |
| 2                 | 0.74 | 0.27 | 0.04 | 0.04 | 0.09  | 0.32 | 0.06  | 0.06 | 0.07  | 0.06 |
| 3                 | 0.83 | 0.09 | 0.04 | 0.04 | 0     | 0    | 0.06  | 0.06 | 0.07  | 0.06 |
| 4                 | 0.87 | 0.09 | 0.03 | 0.04 | 0     | 0    | 0.05  | 0.06 | 0.05  | 0.06 |
| 5                 | 0.88 | 0.09 | 0.02 | 0.04 | 0     | 0    | 0.05  | 0.06 | 0.04  | 0.05 |
| 6                 | 0.91 | 0.08 | 0.02 | 0.04 | 0     | 0    | 0.04  | 0.06 | 0.04  | 0.05 |
| 7                 | 0.92 | 0.08 | 0.02 | 0.04 | 0     | 0    | 0.02  | 0.05 | 0.03  | 0.05 |
| 8                 | 0.93 | 0.08 | 0.02 | 0.04 | 0     | 0    | 0.02  | 0.05 | 0.03  | 0.05 |

|    |      |      |      |      |   |   |      |      |      |      |
|----|------|------|------|------|---|---|------|------|------|------|
| 9  | 0.92 | 0.08 | 0.02 | 0.04 | 0 | 0 | 0.02 | 0.05 | 0.03 | 0.05 |
| 10 | 0.94 | 0.07 | 0.02 | 0.04 | 0 | 0 | 0.02 | 0.05 | 0.03 | 0.05 |
| 11 | 0.94 | 0.07 | 0.02 | 0.04 | 0 | 0 | 0.02 | 0.05 | 0.03 | 0.04 |
| 12 | 0.94 | 0.07 | 0.01 | 0.03 | 0 | 0 | 0.02 | 0.05 | 0.03 | 0.05 |

**age=30 years, timing allo <6 months, cmv=others, donor=UD, graft=PBSC, TBI=no TBI, In vivo Tcell depletion=no,**

| Landmark time (y) | GRFS | se   | GF   | se   | AGVHD | se   | CGVHD | se   | Death | se   |
|-------------------|------|------|------|------|-------|------|-------|------|-------|------|
| 0                 | 0.26 | 0.25 | 0.03 | 0.02 | 0.62  | 0.33 | 0.03  | 0.04 | 0.06  | 0.05 |
| 1                 | 0.34 | 0.31 | 0.03 | 0.03 | 0.54  | 0.41 | 0.03  | 0.05 | 0.06  | 0.06 |
| 2                 | 0.65 | 0.33 | 0.04 | 0.05 | 0.13  | 0.41 | 0.08  | 0.08 | 0.1   | 0.08 |
| 3                 | 0.77 | 0.11 | 0.05 | 0.05 | 0     | 0    | 0.08  | 0.08 | 0.1   | 0.08 |
| 4                 | 0.82 | 0.11 | 0.03 | 0.04 | 0     | 0    | 0.07  | 0.08 | 0.07  | 0.08 |
| 5                 | 0.84 | 0.11 | 0.02 | 0.04 | 0     | 0    | 0.08  | 0.09 | 0.06  | 0.07 |
| 6                 | 0.87 | 0.11 | 0.02 | 0.04 | 0     | 0    | 0.06  | 0.08 | 0.05  | 0.07 |
| 7                 | 0.9  | 0.1  | 0.02 | 0.04 | 0     | 0    | 0.03  | 0.07 | 0.05  | 0.07 |
| 8                 | 0.9  | 0.1  | 0.02 | 0.04 | 0     | 0    | 0.03  | 0.07 | 0.04  | 0.06 |
| 9                 | 0.9  | 0.1  | 0.02 | 0.04 | 0     | 0    | 0.03  | 0.07 | 0.05  | 0.07 |
| 10                | 0.91 | 0.1  | 0.02 | 0.04 | 0     | 0    | 0.03  | 0.06 | 0.04  | 0.06 |
| 11                | 0.92 | 0.09 | 0.02 | 0.04 | 0     | 0    | 0.03  | 0.06 | 0.04  | 0.06 |
| 12                | 0.92 | 0.1  | 0.02 | 0.04 | 0     | 0    | 0.03  | 0.06 | 0.04  | 0.06 |

**age=40 years, timing allo <6 months, cmv=others, donor=UD, graft=PBSC, TBI=no TBI, In vivo Tcell depletion=no,**

| Landmark time (y) | GRFS | se   | GF   | se   | AGVHD | se   | CGVHD | se   | Death | se   |
|-------------------|------|------|------|------|-------|------|-------|------|-------|------|
| 0                 | 0.15 | 0.2  | 0.02 | 0.02 | 0.74  | 0.29 | 0.02  | 0.04 | 0.07  | 0.06 |
| 1                 | 0.21 | 0.27 | 0.03 | 0.03 | 0.67  | 0.4  | 0.03  | 0.05 | 0.06  | 0.07 |
| 2                 | 0.55 | 0.38 | 0.04 | 0.05 | 0.18  | 0.54 | 0.1   | 0.11 | 0.13  | 0.12 |
| 3                 | 0.7  | 0.15 | 0.05 | 0.05 | 0     | 0    | 0.11  | 0.11 | 0.14  | 0.11 |
| 4                 | 0.76 | 0.15 | 0.03 | 0.05 | 0     | 0    | 0.1   | 0.12 | 0.1   | 0.1  |
| 5                 | 0.78 | 0.15 | 0.03 | 0.05 | 0     | 0    | 0.11  | 0.12 | 0.08  | 0.1  |
| 6                 | 0.82 | 0.15 | 0.02 | 0.04 | 0     | 0    | 0.08  | 0.11 | 0.07  | 0.09 |
| 7                 | 0.86 | 0.14 | 0.02 | 0.05 | 0     | 0    | 0.05  | 0.1  | 0.07  | 0.09 |
| 8                 | 0.86 | 0.14 | 0.02 | 0.05 | 0     | 0    | 0.05  | 0.1  | 0.06  | 0.09 |
| 9                 | 0.86 | 0.14 | 0.03 | 0.05 | 0     | 0    | 0.05  | 0.1  | 0.06  | 0.09 |
| 10                | 0.88 | 0.13 | 0.02 | 0.05 | 0     | 0    | 0.04  | 0.09 | 0.06  | 0.09 |
| 11                | 0.89 | 0.13 | 0.02 | 0.05 | 0     | 0    | 0.04  | 0.09 | 0.05  | 0.09 |
| 12                | 0.89 | 0.13 | 0.02 | 0.04 | 0     | 0    | 0.04  | 0.09 | 0.05  | 0.09 |

**age=50 years, timing allo <6 months, cmv=others, donor=UD, graft=PBSC, TBI=no TBI, In vivo Tcell depletion=no,**

| Landmark time (y) | GRFS | se   | GF   | se   | AGVHD | se   | CGVHD | se   | Death | se   |
|-------------------|------|------|------|------|-------|------|-------|------|-------|------|
| 0                 | 0.07 | 0.13 | 0.01 | 0.02 | 0.84  | 0.22 | 0.02  | 0.03 | 0.07  | 0.06 |
| 1                 | 0.11 | 0.2  | 0.02 | 0.03 | 0.79  | 0.34 | 0.03  | 0.06 | 0.06  | 0.08 |
| 2                 | 0.43 | 0.43 | 0.04 | 0.06 | 0.25  | 0.71 | 0.12  | 0.16 | 0.16  | 0.18 |
| 3                 | 0.6  | 0.19 | 0.05 | 0.06 | 0     | 0    | 0.16  | 0.15 | 0.19  | 0.14 |
| 4                 | 0.68 | 0.2  | 0.04 | 0.05 | 0     | 0    | 0.15  | 0.16 | 0.14  | 0.14 |

|    |      |      |      |      |   |   |      |      |      |      |
|----|------|------|------|------|---|---|------|------|------|------|
| 5  | 0.71 | 0.2  | 0.03 | 0.05 | 0 | 0 | 0.15 | 0.17 | 0.11 | 0.13 |
| 6  | 0.76 | 0.2  | 0.03 | 0.05 | 0 | 0 | 0.11 | 0.16 | 0.1  | 0.13 |
| 7  | 0.81 | 0.19 | 0.03 | 0.05 | 0 | 0 | 0.07 | 0.14 | 0.1  | 0.13 |
| 8  | 0.81 | 0.19 | 0.03 | 0.05 | 0 | 0 | 0.07 | 0.14 | 0.09 | 0.13 |
| 9  | 0.81 | 0.19 | 0.03 | 0.06 | 0 | 0 | 0.07 | 0.15 | 0.09 | 0.13 |
| 10 | 0.84 | 0.18 | 0.02 | 0.05 | 0 | 0 | 0.05 | 0.13 | 0.08 | 0.13 |
| 11 | 0.85 | 0.18 | 0.02 | 0.05 | 0 | 0 | 0.06 | 0.13 | 0.07 | 0.12 |
| 12 | 0.85 | 0.18 | 0.02 | 0.05 | 0 | 0 | 0.06 | 0.14 | 0.08 | 0.13 |

**age=10 years, timing allo >6 months, cmv=D-/R-, donor=MRD, graft=BM, TBI=TBI, In vivo Tcell depletion=no,**

| Landmark time (y) | GRFS | se   | GF   | se   | AGVHD | se   | CGVHD | se   | Death | se   |
|-------------------|------|------|------|------|-------|------|-------|------|-------|------|
| 0                 | 0.86 | 0.07 | 0.01 | 0.01 | 0.01  | 0.01 | 0.04  | 0.05 | 0.07  | 0.05 |
| 1                 | 0.87 | 0.07 | 0.01 | 0.01 | 0.01  | 0.01 | 0.04  | 0.05 | 0.06  | 0.05 |
| 2                 | 0.88 | 0.07 | 0.01 | 0.01 | 0     | 0.01 | 0.05  | 0.05 | 0.06  | 0.05 |
| 3                 | 0.89 | 0.07 | 0.01 | 0.01 | 0     | 0    | 0.05  | 0.05 | 0.05  | 0.05 |
| 4                 | 0.92 | 0.07 | 0    | 0.01 | 0     | 0    | 0.04  | 0.05 | 0.04  | 0.04 |
| 5                 | 0.92 | 0.07 | 0    | 0.01 | 0     | 0    | 0.04  | 0.05 | 0.03  | 0.04 |
| 6                 | 0.94 | 0.06 | 0    | 0.01 | 0     | 0    | 0.03  | 0.05 | 0.03  | 0.04 |
| 7                 | 0.95 | 0.06 | 0    | 0.01 | 0     | 0    | 0.02  | 0.04 | 0.03  | 0.04 |
| 8                 | 0.96 | 0.06 | 0    | 0.01 | 0     | 0    | 0.02  | 0.04 | 0.02  | 0.04 |
| 9                 | 0.95 | 0.06 | 0    | 0.01 | 0     | 0    | 0.02  | 0.04 | 0.02  | 0.04 |
| 10                | 0.96 | 0.05 | 0    | 0.01 | 0     | 0    | 0.01  | 0.04 | 0.02  | 0.04 |
| 11                | 0.96 | 0.05 | 0    | 0.01 | 0     | 0    | 0.01  | 0.04 | 0.02  | 0.03 |
| 12                | 0.96 | 0.05 | 0    | 0.01 | 0     | 0    | 0.01  | 0.04 | 0.02  | 0.03 |

**age=20 years, timing allo >6 months, cmv=D-/R-, donor=MRD, graft=BM, TBI=TBI, In vivo Tcell depletion=no,**

| Landmark time (y) | GRFS | se   | GF   | se   | AGVHD | se   | CGVHD | se   | Death | se   |
|-------------------|------|------|------|------|-------|------|-------|------|-------|------|
| 0                 | 0.81 | 0.08 | 0.01 | 0.01 | 0.02  | 0.02 | 0.06  | 0.06 | 0.1   | 0.06 |
| 1                 | 0.82 | 0.09 | 0.01 | 0.01 | 0.01  | 0.02 | 0.06  | 0.06 | 0.09  | 0.06 |
| 2                 | 0.83 | 0.09 | 0.01 | 0.01 | 0     | 0.01 | 0.07  | 0.07 | 0.09  | 0.06 |
| 3                 | 0.85 | 0.09 | 0.01 | 0.01 | 0     | 0    | 0.07  | 0.07 | 0.08  | 0.06 |
| 4                 | 0.88 | 0.09 | 0.01 | 0.01 | 0     | 0    | 0.06  | 0.07 | 0.06  | 0.06 |
| 5                 | 0.89 | 0.09 | 0    | 0.01 | 0     | 0    | 0.06  | 0.07 | 0.04  | 0.05 |
| 6                 | 0.91 | 0.08 | 0    | 0.01 | 0     | 0    | 0.04  | 0.07 | 0.04  | 0.05 |
| 7                 | 0.93 | 0.08 | 0    | 0.01 | 0     | 0    | 0.03  | 0.06 | 0.04  | 0.05 |
| 8                 | 0.94 | 0.07 | 0    | 0.01 | 0     | 0    | 0.03  | 0.06 | 0.03  | 0.05 |
| 9                 | 0.94 | 0.08 | 0    | 0.01 | 0     | 0    | 0.03  | 0.06 | 0.03  | 0.05 |
| 10                | 0.95 | 0.07 | 0    | 0.01 | 0     | 0    | 0.02  | 0.05 | 0.03  | 0.05 |
| 11                | 0.95 | 0.07 | 0    | 0.01 | 0     | 0    | 0.02  | 0.05 | 0.03  | 0.04 |
| 12                | 0.95 | 0.07 | 0    | 0.01 | 0     | 0    | 0.02  | 0.05 | 0.03  | 0.05 |

**age=30 years, timing allo >6 months, cmv=D-/R-, donor=MRD, graft=BM, TBI=TBI, In vivo Tcell depletion=no,**

| Landmark time (y) | GRFS | se   | GF   | se   | AGVHD | se   | CGVHD | se   | Death | se   |
|-------------------|------|------|------|------|-------|------|-------|------|-------|------|
| 0                 | 0.73 | 0.11 | 0.01 | 0.01 | 0.02  | 0.02 | 0.08  | 0.08 | 0.15  | 0.08 |

|    |      |      |      |      |      |      |      |      |      |      |
|----|------|------|------|------|------|------|------|------|------|------|
| 1  | 0.76 | 0.11 | 0.01 | 0.01 | 0.02 | 0.02 | 0.09 | 0.08 | 0.13 | 0.08 |
| 2  | 0.77 | 0.12 | 0.01 | 0.01 | 0    | 0.01 | 0.1  | 0.09 | 0.12 | 0.08 |
| 3  | 0.79 | 0.12 | 0.01 | 0.01 | 0    | 0    | 0.09 | 0.09 | 0.11 | 0.08 |
| 4  | 0.83 | 0.12 | 0.01 | 0.01 | 0    | 0    | 0.08 | 0.1  | 0.08 | 0.07 |
| 5  | 0.85 | 0.12 | 0    | 0.01 | 0    | 0    | 0.09 | 0.1  | 0.06 | 0.07 |
| 6  | 0.88 | 0.11 | 0    | 0.01 | 0    | 0    | 0.06 | 0.09 | 0.06 | 0.07 |
| 7  | 0.91 | 0.1  | 0    | 0.01 | 0    | 0    | 0.04 | 0.08 | 0.05 | 0.07 |
| 8  | 0.91 | 0.1  | 0    | 0.01 | 0    | 0    | 0.04 | 0.08 | 0.05 | 0.06 |
| 9  | 0.91 | 0.1  | 0    | 0.01 | 0    | 0    | 0.04 | 0.08 | 0.05 | 0.07 |
| 10 | 0.92 | 0.1  | 0    | 0.01 | 0    | 0    | 0.03 | 0.07 | 0.04 | 0.06 |
| 11 | 0.93 | 0.09 | 0    | 0.01 | 0    | 0    | 0.03 | 0.07 | 0.04 | 0.06 |
| 12 | 0.93 | 0.09 | 0    | 0.01 | 0    | 0    | 0.03 | 0.07 | 0.04 | 0.06 |

**age=40 years, timing allo >6 months, cmv=D-/R-, donor=MRD, graft=BM, TBI=TBI, In vivo Tcell depletion=no,**

| Landmark time (y) | GRFS | se   | GF   | se   | AGVHD | se   | CGVHD | se   | Death | se   |
|-------------------|------|------|------|------|-------|------|-------|------|-------|------|
| 0                 | 0.64 | 0.13 | 0.01 | 0.01 | 0.03  | 0.03 | 0.12  | 0.1  | 0.2   | 0.1  |
| 1                 | 0.67 | 0.14 | 0.01 | 0.01 | 0.03  | 0.03 | 0.12  | 0.11 | 0.18  | 0.1  |
| 2                 | 0.68 | 0.15 | 0.01 | 0.01 | 0     | 0.02 | 0.14  | 0.12 | 0.17  | 0.1  |
| 3                 | 0.71 | 0.15 | 0.01 | 0.01 | 0     | 0    | 0.13  | 0.13 | 0.15  | 0.1  |
| 4                 | 0.77 | 0.16 | 0.01 | 0.01 | 0     | 0    | 0.12  | 0.13 | 0.11  | 0.1  |
| 5                 | 0.79 | 0.15 | 0.01 | 0.01 | 0     | 0    | 0.12  | 0.13 | 0.09  | 0.09 |
| 6                 | 0.83 | 0.15 | 0    | 0.01 | 0     | 0    | 0.09  | 0.13 | 0.08  | 0.09 |
| 7                 | 0.87 | 0.14 | 0    | 0.01 | 0     | 0    | 0.05  | 0.11 | 0.07  | 0.09 |
| 8                 | 0.87 | 0.14 | 0    | 0.01 | 0     | 0    | 0.05  | 0.11 | 0.07  | 0.09 |
| 9                 | 0.87 | 0.14 | 0.01 | 0.01 | 0     | 0    | 0.06  | 0.11 | 0.07  | 0.09 |
| 10                | 0.89 | 0.13 | 0    | 0.01 | 0     | 0    | 0.04  | 0.1  | 0.06  | 0.09 |
| 11                | 0.9  | 0.13 | 0    | 0.01 | 0     | 0    | 0.04  | 0.1  | 0.06  | 0.08 |
| 12                | 0.9  | 0.13 | 0    | 0.01 | 0     | 0    | 0.04  | 0.1  | 0.06  | 0.09 |

**age=50 years, timing allo >6 months, cmv=D-/R-, donor=MRD, graft=BM, TBI=TBI, In vivo Tcell depletion=no,**

| Landmark time (y) | GRFS | se   | GF   | se   | AGVHD | se   | CGVHD | se   | Death | se   |
|-------------------|------|------|------|------|-------|------|-------|------|-------|------|
| 0                 | 0.53 | 0.16 | 0.01 | 0.01 | 0.04  | 0.04 | 0.15  | 0.13 | 0.27  | 0.12 |
| 1                 | 0.56 | 0.17 | 0.01 | 0.01 | 0.04  | 0.04 | 0.16  | 0.14 | 0.24  | 0.13 |
| 2                 | 0.57 | 0.18 | 0.01 | 0.01 | 0.01  | 0.02 | 0.18  | 0.16 | 0.23  | 0.13 |
| 3                 | 0.61 | 0.19 | 0.01 | 0.01 | 0     | 0    | 0.18  | 0.17 | 0.2   | 0.14 |
| 4                 | 0.68 | 0.2  | 0.01 | 0.01 | 0     | 0    | 0.16  | 0.18 | 0.15  | 0.13 |
| 5                 | 0.7  | 0.21 | 0.01 | 0.01 | 0     | 0    | 0.17  | 0.19 | 0.12  | 0.13 |
| 6                 | 0.76 | 0.21 | 0    | 0.01 | 0     | 0    | 0.13  | 0.18 | 0.11  | 0.12 |
| 7                 | 0.81 | 0.19 | 0.01 | 0.01 | 0     | 0    | 0.08  | 0.16 | 0.1   | 0.13 |
| 8                 | 0.82 | 0.19 | 0.01 | 0.01 | 0     | 0    | 0.08  | 0.16 | 0.1   | 0.12 |
| 9                 | 0.82 | 0.2  | 0.01 | 0.01 | 0     | 0    | 0.08  | 0.16 | 0.1   | 0.13 |
| 10                | 0.84 | 0.19 | 0    | 0.01 | 0     | 0    | 0.06  | 0.15 | 0.09  | 0.12 |
| 11                | 0.85 | 0.18 | 0    | 0.01 | 0     | 0    | 0.06  | 0.15 | 0.08  | 0.12 |
| 12                | 0.85 | 0.19 | 0    | 0.01 | 0     | 0    | 0.06  | 0.15 | 0.08  | 0.12 |

**age=10 years, timing allo <6 months, cmv=D-/R-, donor=MRD, graft=BM, TBI=TBI, In vivo Tcell depletion=no,**

| Landmark time (y) | GRFS | se   | GF   | se   | AGVHD | se   | CGVHD | se   | Death | se   |
|-------------------|------|------|------|------|-------|------|-------|------|-------|------|
| 0                 | 0.81 | 0.1  | 0.01 | 0.01 | 0.02  | 0.02 | 0.1   | 0.1  | 0.06  | 0.04 |
| 1                 | 0.82 | 0.11 | 0.01 | 0.01 | 0.02  | 0.02 | 0.1   | 0.1  | 0.05  | 0.04 |
| 2                 | 0.83 | 0.11 | 0.01 | 0.01 | 0     | 0.01 | 0.11  | 0.11 | 0.05  | 0.04 |
| 3                 | 0.84 | 0.11 | 0.01 | 0.01 | 0     | 0    | 0.1   | 0.11 | 0.05  | 0.04 |
| 4                 | 0.87 | 0.12 | 0    | 0.01 | 0     | 0    | 0.09  | 0.11 | 0.03  | 0.04 |
| 5                 | 0.88 | 0.12 | 0    | 0.01 | 0     | 0    | 0.09  | 0.11 | 0.03  | 0.03 |
| 6                 | 0.91 | 0.11 | 0    | 0.01 | 0     | 0    | 0.07  | 0.11 | 0.02  | 0.03 |
| 7                 | 0.93 | 0.1  | 0    | 0.01 | 0     | 0    | 0.04  | 0.09 | 0.02  | 0.03 |
| 8                 | 0.94 | 0.1  | 0    | 0.01 | 0     | 0    | 0.04  | 0.09 | 0.02  | 0.03 |
| 9                 | 0.94 | 0.1  | 0    | 0.01 | 0     | 0    | 0.04  | 0.09 | 0.02  | 0.03 |
| 10                | 0.95 | 0.09 | 0    | 0.01 | 0     | 0    | 0.03  | 0.08 | 0.02  | 0.03 |
| 11                | 0.95 | 0.09 | 0    | 0.01 | 0     | 0    | 0.03  | 0.08 | 0.02  | 0.03 |
| 12                | 0.95 | 0.09 | 0    | 0.01 | 0     | 0    | 0.03  | 0.08 | 0.02  | 0.03 |

**age=20 years, timing allo <6 months, cmv=D-/R-, donor=MRD, graft=BM, TBI=TBI, In vivo Tcell depletion=no,**

| Landmark time (y) | GRFS | se   | GF   | se   | AGVHD | se   | CGVHD | se   | Death | se   |
|-------------------|------|------|------|------|-------|------|-------|------|-------|------|
| 0                 | 0.74 | 0.13 | 0.01 | 0.01 | 0.03  | 0.03 | 0.13  | 0.13 | 0.09  | 0.05 |
| 1                 | 0.75 | 0.14 | 0.01 | 0.01 | 0.02  | 0.03 | 0.14  | 0.13 | 0.08  | 0.05 |
| 2                 | 0.76 | 0.15 | 0.01 | 0.01 | 0     | 0.02 | 0.15  | 0.14 | 0.07  | 0.05 |
| 3                 | 0.78 | 0.15 | 0.01 | 0.01 | 0     | 0    | 0.15  | 0.15 | 0.06  | 0.05 |
| 4                 | 0.82 | 0.15 | 0    | 0.01 | 0     | 0    | 0.13  | 0.15 | 0.05  | 0.05 |
| 5                 | 0.83 | 0.15 | 0    | 0.01 | 0     | 0    | 0.13  | 0.15 | 0.04  | 0.04 |
| 6                 | 0.87 | 0.15 | 0    | 0.01 | 0     | 0    | 0.1   | 0.15 | 0.03  | 0.04 |
| 7                 | 0.91 | 0.13 | 0    | 0.01 | 0     | 0    | 0.06  | 0.13 | 0.03  | 0.04 |
| 8                 | 0.91 | 0.13 | 0    | 0.01 | 0     | 0    | 0.06  | 0.13 | 0.03  | 0.04 |
| 9                 | 0.91 | 0.13 | 0    | 0.01 | 0     | 0    | 0.06  | 0.13 | 0.03  | 0.04 |
| 10                | 0.92 | 0.12 | 0    | 0.01 | 0     | 0    | 0.05  | 0.12 | 0.03  | 0.04 |
| 11                | 0.93 | 0.12 | 0    | 0.01 | 0     | 0    | 0.05  | 0.12 | 0.02  | 0.04 |
| 12                | 0.93 | 0.12 | 0    | 0.01 | 0     | 0    | 0.05  | 0.12 | 0.02  | 0.04 |

**age=30 years, timing allo <6 months, cmv=D-/R-, donor=MRD, graft=BM, TBI=TBI, In vivo Tcell depletion=no,**

| Landmark time (y) | GRFS | se   | GF   | se   | AGVHD | se   | CGVHD | se   | Death | se   |
|-------------------|------|------|------|------|-------|------|-------|------|-------|------|
| 0                 | 0.64 | 0.17 | 0.01 | 0.01 | 0.04  | 0.04 | 0.18  | 0.16 | 0.12  | 0.07 |
| 1                 | 0.66 | 0.17 | 0.01 | 0.01 | 0.03  | 0.04 | 0.19  | 0.17 | 0.11  | 0.07 |
| 2                 | 0.67 | 0.19 | 0.01 | 0.01 | 0.01  | 0.02 | 0.21  | 0.19 | 0.1   | 0.07 |
| 3                 | 0.7  | 0.2  | 0.01 | 0.01 | 0     | 0    | 0.21  | 0.19 | 0.09  | 0.07 |
| 4                 | 0.75 | 0.2  | 0.01 | 0.01 | 0     | 0    | 0.18  | 0.2  | 0.06  | 0.07 |
| 5                 | 0.76 | 0.21 | 0    | 0.01 | 0     | 0    | 0.19  | 0.21 | 0.05  | 0.06 |
| 6                 | 0.81 | 0.2  | 0    | 0.01 | 0     | 0    | 0.14  | 0.2  | 0.05  | 0.06 |
| 7                 | 0.87 | 0.18 | 0    | 0.01 | 0     | 0    | 0.09  | 0.18 | 0.04  | 0.06 |
| 8                 | 0.87 | 0.18 | 0    | 0.01 | 0     | 0    | 0.09  | 0.18 | 0.04  | 0.06 |



|    |      |      |   |      |   |   |      |      |      |      |
|----|------|------|---|------|---|---|------|------|------|------|
| 9  | 0.87 | 0.18 | 0 | 0.01 | 0 | 0 | 0.09 | 0.18 | 0.04 | 0.06 |
| 10 | 0.89 | 0.17 | 0 | 0.01 | 0 | 0 | 0.07 | 0.16 | 0.04 | 0.06 |
| 11 | 0.9  | 0.17 | 0 | 0.01 | 0 | 0 | 0.07 | 0.17 | 0.03 | 0.05 |
| 12 | 0.9  | 0.17 | 0 | 0.01 | 0 | 0 | 0.07 | 0.17 | 0.03 | 0.06 |

**age=40 years, timing allo <6 months, cmv=D-/R-, donor=MRD, graft=BM, TBI=TBI, In vivo Tcell depletion=no,**

| Landmark time (y) | GRFS | se   | GF   | se   | AGVHD | se   | CGVHD | se   | Death | se   |
|-------------------|------|------|------|------|-------|------|-------|------|-------|------|
| 0                 | 0.53 | 0.21 | 0.01 | 0.01 | 0.06  | 0.06 | 0.24  | 0.21 | 0.16  | 0.09 |
| 1                 | 0.55 | 0.22 | 0.01 | 0.01 | 0.05  | 0.06 | 0.25  | 0.22 | 0.14  | 0.09 |
| 2                 | 0.56 | 0.24 | 0.01 | 0.01 | 0.01  | 0.03 | 0.29  | 0.24 | 0.14  | 0.09 |
| 3                 | 0.59 | 0.25 | 0.01 | 0.01 | 0     | 0    | 0.28  | 0.25 | 0.12  | 0.09 |
| 4                 | 0.65 | 0.27 | 0.01 | 0.01 | 0     | 0    | 0.25  | 0.27 | 0.09  | 0.09 |
| 5                 | 0.67 | 0.27 | 0    | 0.01 | 0     | 0    | 0.26  | 0.28 | 0.07  | 0.08 |
| 6                 | 0.74 | 0.28 | 0    | 0.01 | 0     | 0    | 0.2   | 0.28 | 0.06  | 0.08 |
| 7                 | 0.81 | 0.26 | 0    | 0.01 | 0     | 0    | 0.12  | 0.25 | 0.06  | 0.08 |
| 8                 | 0.82 | 0.26 | 0    | 0.01 | 0     | 0    | 0.12  | 0.25 | 0.06  | 0.08 |
| 9                 | 0.81 | 0.26 | 0    | 0.01 | 0     | 0    | 0.12  | 0.26 | 0.06  | 0.08 |
| 10                | 0.85 | 0.24 | 0    | 0.01 | 0     | 0    | 0.1   | 0.24 | 0.05  | 0.08 |
| 11                | 0.85 | 0.24 | 0    | 0.01 | 0     | 0    | 0.1   | 0.24 | 0.05  | 0.08 |
| 12                | 0.85 | 0.24 | 0    | 0.01 | 0     | 0    | 0.1   | 0.24 | 0.05  | 0.08 |

**age=50 years, timing allo <6 months, cmv=D-/R-, donor=MRD, graft=BM, TBI=TBI, In vivo Tcell depletion=no,**

| Landmark time (y) | GRFS | se   | GF   | se   | AGVHD | se   | CGVHD | se   | Death | se   |
|-------------------|------|------|------|------|-------|------|-------|------|-------|------|
| 0                 | 0.39 | 0.24 | 0.01 | 0.01 | 0.08  | 0.08 | 0.3   | 0.25 | 0.21  | 0.11 |
| 1                 | 0.42 | 0.25 | 0.01 | 0.01 | 0.07  | 0.09 | 0.32  | 0.26 | 0.19  | 0.11 |
| 2                 | 0.43 | 0.28 | 0.01 | 0.01 | 0.01  | 0.05 | 0.37  | 0.29 | 0.18  | 0.12 |
| 3                 | 0.46 | 0.3  | 0.01 | 0.01 | 0     | 0    | 0.37  | 0.32 | 0.16  | 0.12 |
| 4                 | 0.53 | 0.34 | 0.01 | 0.01 | 0     | 0    | 0.34  | 0.35 | 0.12  | 0.12 |
| 5                 | 0.55 | 0.35 | 0    | 0.01 | 0     | 0    | 0.35  | 0.37 | 0.09  | 0.11 |
| 6                 | 0.64 | 0.37 | 0    | 0.01 | 0     | 0    | 0.27  | 0.38 | 0.08  | 0.11 |
| 7                 | 0.74 | 0.36 | 0    | 0.01 | 0     | 0    | 0.17  | 0.36 | 0.09  | 0.12 |
| 8                 | 0.74 | 0.36 | 0    | 0.01 | 0     | 0    | 0.17  | 0.36 | 0.08  | 0.12 |
| 9                 | 0.74 | 0.36 | 0    | 0.01 | 0     | 0    | 0.18  | 0.37 | 0.08  | 0.12 |
| 10                | 0.78 | 0.35 | 0    | 0.01 | 0     | 0    | 0.14  | 0.35 | 0.07  | 0.12 |
| 11                | 0.79 | 0.35 | 0    | 0.01 | 0     | 0    | 0.14  | 0.35 | 0.07  | 0.11 |
| 12                | 0.79 | 0.35 | 0    | 0.01 | 0     | 0    | 0.14  | 0.35 | 0.07  | 0.11 |

**age=10 years, timing allo >6 months, cmv=others, donor=MRD, graft=BM, TBI=TBI, In vivo Tcell depletion=no,**

| Landmark time (y) | GRFS | se   | GF   | se   | AGVHD | se   | CGVHD | se   | Death | se   |
|-------------------|------|------|------|------|-------|------|-------|------|-------|------|
| 0                 | 0.84 | 0.07 | 0.04 | 0.04 | 0.02  | 0.02 | 0.03  | 0.03 | 0.06  | 0.04 |
| 1                 | 0.85 | 0.07 | 0.04 | 0.04 | 0.02  | 0.02 | 0.03  | 0.04 | 0.05  | 0.04 |
| 2                 | 0.87 | 0.07 | 0.03 | 0.04 | 0     | 0.01 | 0.04  | 0.04 | 0.05  | 0.04 |
| 3                 | 0.88 | 0.07 | 0.03 | 0.04 | 0     | 0    | 0.04  | 0.04 | 0.04  | 0.04 |
| 4                 | 0.91 | 0.06 | 0.02 | 0.04 | 0     | 0    | 0.03  | 0.04 | 0.03  | 0.03 |

|    |      |      |      |      |   |   |      |      |      |      |
|----|------|------|------|------|---|---|------|------|------|------|
| 5  | 0.92 | 0.06 | 0.02 | 0.03 | 0 | 0 | 0.03 | 0.04 | 0.03 | 0.03 |
| 6  | 0.94 | 0.06 | 0.02 | 0.03 | 0 | 0 | 0.02 | 0.04 | 0.02 | 0.03 |
| 7  | 0.95 | 0.05 | 0.02 | 0.03 | 0 | 0 | 0.01 | 0.03 | 0.02 | 0.03 |
| 8  | 0.95 | 0.05 | 0.02 | 0.03 | 0 | 0 | 0.01 | 0.03 | 0.02 | 0.03 |
| 9  | 0.95 | 0.06 | 0.02 | 0.03 | 0 | 0 | 0.01 | 0.03 | 0.02 | 0.03 |
| 10 | 0.96 | 0.05 | 0.01 | 0.03 | 0 | 0 | 0.01 | 0.03 | 0.02 | 0.03 |
| 11 | 0.96 | 0.05 | 0.01 | 0.03 | 0 | 0 | 0.01 | 0.03 | 0.02 | 0.03 |
| 12 | 0.96 | 0.05 | 0.01 | 0.03 | 0 | 0 | 0.01 | 0.03 | 0.02 | 0.03 |

**age=20 years, timing allo >6 months, cmv=others, donor=MRD, graft=BM, TBI=TBI, In vivo Tcell depletion=no,**

| Landmark time (y) | GRFS | se   | GF   | se   | AGVHD | se   | CGVHD | se   | Death | se   |
|-------------------|------|------|------|------|-------|------|-------|------|-------|------|
| 0                 | 0.79 | 0.08 | 0.05 | 0.04 | 0.03  | 0.03 | 0.05  | 0.04 | 0.09  | 0.05 |
| 1                 | 0.81 | 0.08 | 0.05 | 0.04 | 0.02  | 0.03 | 0.05  | 0.05 | 0.07  | 0.05 |
| 2                 | 0.83 | 0.08 | 0.04 | 0.04 | 0     | 0.02 | 0.06  | 0.05 | 0.07  | 0.05 |
| 3                 | 0.85 | 0.08 | 0.04 | 0.04 | 0     | 0    | 0.05  | 0.05 | 0.06  | 0.05 |
| 4                 | 0.88 | 0.08 | 0.02 | 0.04 | 0     | 0    | 0.05  | 0.05 | 0.05  | 0.05 |
| 5                 | 0.9  | 0.07 | 0.02 | 0.03 | 0     | 0    | 0.05  | 0.05 | 0.04  | 0.04 |
| 6                 | 0.92 | 0.07 | 0.02 | 0.03 | 0     | 0    | 0.03  | 0.05 | 0.03  | 0.04 |
| 7                 | 0.93 | 0.07 | 0.02 | 0.03 | 0     | 0    | 0.02  | 0.04 | 0.03  | 0.04 |
| 8                 | 0.93 | 0.06 | 0.02 | 0.03 | 0     | 0    | 0.02  | 0.04 | 0.03  | 0.04 |
| 9                 | 0.93 | 0.07 | 0.02 | 0.04 | 0     | 0    | 0.02  | 0.04 | 0.03  | 0.04 |
| 10                | 0.94 | 0.06 | 0.02 | 0.03 | 0     | 0    | 0.02  | 0.04 | 0.03  | 0.04 |
| 11                | 0.95 | 0.06 | 0.02 | 0.03 | 0     | 0    | 0.02  | 0.04 | 0.02  | 0.04 |
| 12                | 0.95 | 0.06 | 0.01 | 0.03 | 0     | 0    | 0.02  | 0.04 | 0.02  | 0.04 |

**age=30 years, timing allo >6 months, cmv=others, donor=MRD, graft=BM, TBI=TBI, In vivo Tcell depletion=no,**

| Landmark time (y) | GRFS | se   | GF   | se   | AGVHD | se   | CGVHD | se   | Death | se   |
|-------------------|------|------|------|------|-------|------|-------|------|-------|------|
| 0                 | 0.72 | 0.09 | 0.05 | 0.04 | 0.04  | 0.04 | 0.07  | 0.06 | 0.12  | 0.06 |
| 1                 | 0.74 | 0.09 | 0.05 | 0.04 | 0.03  | 0.04 | 0.07  | 0.06 | 0.1   | 0.06 |
| 2                 | 0.77 | 0.1  | 0.04 | 0.04 | 0.01  | 0.02 | 0.08  | 0.07 | 0.1   | 0.06 |
| 3                 | 0.79 | 0.09 | 0.04 | 0.04 | 0     | 0    | 0.08  | 0.07 | 0.09  | 0.06 |
| 4                 | 0.84 | 0.09 | 0.03 | 0.04 | 0     | 0    | 0.07  | 0.07 | 0.07  | 0.06 |
| 5                 | 0.86 | 0.09 | 0.02 | 0.04 | 0     | 0    | 0.07  | 0.07 | 0.05  | 0.05 |
| 6                 | 0.88 | 0.09 | 0.02 | 0.04 | 0     | 0    | 0.05  | 0.07 | 0.05  | 0.05 |
| 7                 | 0.91 | 0.08 | 0.02 | 0.04 | 0     | 0    | 0.03  | 0.06 | 0.04  | 0.05 |
| 8                 | 0.91 | 0.08 | 0.02 | 0.04 | 0     | 0    | 0.03  | 0.06 | 0.04  | 0.05 |
| 9                 | 0.91 | 0.08 | 0.02 | 0.04 | 0     | 0    | 0.03  | 0.06 | 0.04  | 0.05 |
| 10                | 0.92 | 0.08 | 0.02 | 0.04 | 0     | 0    | 0.02  | 0.05 | 0.04  | 0.05 |
| 11                | 0.93 | 0.08 | 0.02 | 0.04 | 0     | 0    | 0.02  | 0.05 | 0.03  | 0.05 |
| 12                | 0.93 | 0.08 | 0.01 | 0.03 | 0     | 0    | 0.02  | 0.05 | 0.03  | 0.05 |

**age=40 years, timing allo >6 months, cmv=others, donor=MRD, graft=BM, TBI=TBI, In vivo Tcell depletion=no,**

| Landmark time (y) | GRFS | se  | GF   | se   | AGVHD | se   | CGVHD | se   | Death | se   |
|-------------------|------|-----|------|------|-------|------|-------|------|-------|------|
| 0                 | 0.63 | 0.1 | 0.05 | 0.04 | 0.06  | 0.05 | 0.09  | 0.07 | 0.16  | 0.07 |

|    |      |      |      |      |      |      |      |      |      |      |
|----|------|------|------|------|------|------|------|------|------|------|
| 1  | 0.66 | 0.11 | 0.05 | 0.04 | 0.05 | 0.05 | 0.09 | 0.07 | 0.14 | 0.08 |
| 2  | 0.7  | 0.12 | 0.04 | 0.04 | 0.01 | 0.03 | 0.11 | 0.09 | 0.14 | 0.08 |
| 3  | 0.73 | 0.12 | 0.04 | 0.04 | 0    | 0    | 0.11 | 0.09 | 0.12 | 0.08 |
| 4  | 0.78 | 0.12 | 0.03 | 0.04 | 0    | 0    | 0.1  | 0.09 | 0.09 | 0.08 |
| 5  | 0.81 | 0.12 | 0.02 | 0.04 | 0    | 0    | 0.1  | 0.09 | 0.07 | 0.07 |
| 6  | 0.84 | 0.11 | 0.02 | 0.04 | 0    | 0    | 0.07 | 0.09 | 0.07 | 0.07 |
| 7  | 0.87 | 0.11 | 0.02 | 0.04 | 0    | 0    | 0.04 | 0.08 | 0.06 | 0.07 |
| 8  | 0.88 | 0.11 | 0.02 | 0.04 | 0    | 0    | 0.04 | 0.08 | 0.06 | 0.07 |
| 9  | 0.88 | 0.11 | 0.02 | 0.04 | 0    | 0    | 0.04 | 0.08 | 0.06 | 0.07 |
| 10 | 0.89 | 0.1  | 0.02 | 0.04 | 0    | 0    | 0.03 | 0.07 | 0.05 | 0.07 |
| 11 | 0.9  | 0.1  | 0.02 | 0.04 | 0    | 0    | 0.03 | 0.07 | 0.05 | 0.06 |
| 12 | 0.9  | 0.1  | 0.02 | 0.04 | 0    | 0    | 0.03 | 0.07 | 0.05 | 0.07 |

**age=50 years, timing allo >6 months, cmv=others, donor=MRD, graft=BM, TBI=TBI, In vivo Tcell depletion=no,**

| Landmark time (y) | GRFS | se   | GF   | se   | AGVHD | se   | CGVHD | se   | Death | se   |
|-------------------|------|------|------|------|-------|------|-------|------|-------|------|
| 0                 | 0.53 | 0.12 | 0.06 | 0.04 | 0.08  | 0.06 | 0.12  | 0.09 | 0.22  | 0.09 |
| 1                 | 0.56 | 0.13 | 0.06 | 0.04 | 0.07  | 0.06 | 0.12  | 0.1  | 0.19  | 0.09 |
| 2                 | 0.6  | 0.14 | 0.05 | 0.04 | 0.01  | 0.04 | 0.15  | 0.11 | 0.19  | 0.1  |
| 3                 | 0.64 | 0.15 | 0.05 | 0.05 | 0     | 0    | 0.15  | 0.12 | 0.17  | 0.1  |
| 4                 | 0.71 | 0.15 | 0.03 | 0.04 | 0     | 0    | 0.13  | 0.13 | 0.13  | 0.1  |
| 5                 | 0.73 | 0.15 | 0.02 | 0.04 | 0     | 0    | 0.14  | 0.13 | 0.1   | 0.1  |
| 6                 | 0.78 | 0.15 | 0.02 | 0.04 | 0     | 0    | 0.1   | 0.13 | 0.09  | 0.09 |
| 7                 | 0.83 | 0.14 | 0.02 | 0.04 | 0     | 0    | 0.06  | 0.11 | 0.09  | 0.1  |
| 8                 | 0.83 | 0.14 | 0.02 | 0.04 | 0     | 0    | 0.06  | 0.11 | 0.08  | 0.09 |
| 9                 | 0.83 | 0.14 | 0.02 | 0.04 | 0     | 0    | 0.06  | 0.11 | 0.08  | 0.09 |
| 10                | 0.85 | 0.14 | 0.02 | 0.04 | 0     | 0    | 0.05  | 0.1  | 0.07  | 0.09 |
| 11                | 0.86 | 0.14 | 0.02 | 0.04 | 0     | 0    | 0.05  | 0.1  | 0.07  | 0.09 |
| 12                | 0.86 | 0.14 | 0.02 | 0.04 | 0     | 0    | 0.05  | 0.1  | 0.07  | 0.09 |

**age=10 years, timing allo <6 months, cmv=others, donor=MRD, graft=BM, TBI=TBI, In vivo Tcell depletion=no,**

| Landmark time (y) | GRFS | se   | GF   | se   | AGVHD | se   | CGVHD | se   | Death | se   |
|-------------------|------|------|------|------|-------|------|-------|------|-------|------|
| 0                 | 0.79 | 0.08 | 0.04 | 0.03 | 0.04  | 0.04 | 0.07  | 0.07 | 0.05  | 0.03 |
| 1                 | 0.81 | 0.08 | 0.04 | 0.03 | 0.03  | 0.04 | 0.08  | 0.07 | 0.04  | 0.03 |
| 2                 | 0.83 | 0.09 | 0.03 | 0.03 | 0.01  | 0.02 | 0.09  | 0.08 | 0.04  | 0.03 |
| 3                 | 0.85 | 0.09 | 0.03 | 0.03 | 0     | 0    | 0.08  | 0.08 | 0.04  | 0.03 |
| 4                 | 0.88 | 0.09 | 0.02 | 0.03 | 0     | 0    | 0.07  | 0.08 | 0.03  | 0.03 |
| 5                 | 0.89 | 0.09 | 0.02 | 0.03 | 0     | 0    | 0.07  | 0.08 | 0.02  | 0.03 |
| 6                 | 0.91 | 0.08 | 0.01 | 0.03 | 0     | 0    | 0.05  | 0.08 | 0.02  | 0.03 |
| 7                 | 0.94 | 0.07 | 0.01 | 0.03 | 0     | 0    | 0.03  | 0.07 | 0.02  | 0.03 |
| 8                 | 0.94 | 0.07 | 0.01 | 0.03 | 0     | 0    | 0.03  | 0.07 | 0.02  | 0.02 |
| 9                 | 0.94 | 0.07 | 0.01 | 0.03 | 0     | 0    | 0.03  | 0.07 | 0.02  | 0.02 |
| 10                | 0.95 | 0.07 | 0.01 | 0.03 | 0     | 0    | 0.03  | 0.06 | 0.02  | 0.02 |
| 11                | 0.95 | 0.07 | 0.01 | 0.03 | 0     | 0    | 0.03  | 0.06 | 0.01  | 0.02 |
| 12                | 0.95 | 0.07 | 0.01 | 0.02 | 0     | 0    | 0.03  | 0.06 | 0.01  | 0.02 |

**age=20 years, timing allo <6 months, cmv=others, donor=MRD, graft=BM, TBI=TBI, In vivo Tcell depletion=no,**

| Landmark time (y) | GRFS | se   | GF   | se   | AGVHD | se   | CGVHD | se   | Death | se   |
|-------------------|------|------|------|------|-------|------|-------|------|-------|------|
| 0                 | 0.73 | 0.1  | 0.04 | 0.03 | 0.06  | 0.05 | 0.1   | 0.09 | 0.07  | 0.04 |
| 1                 | 0.74 | 0.1  | 0.04 | 0.03 | 0.05  | 0.05 | 0.11  | 0.09 | 0.06  | 0.04 |
| 2                 | 0.77 | 0.11 | 0.03 | 0.03 | 0.01  | 0.02 | 0.12  | 0.1  | 0.06  | 0.04 |
| 3                 | 0.8  | 0.11 | 0.03 | 0.03 | 0     | 0    | 0.12  | 0.1  | 0.05  | 0.04 |
| 4                 | 0.84 | 0.11 | 0.02 | 0.03 | 0     | 0    | 0.1   | 0.11 | 0.04  | 0.04 |
| 5                 | 0.85 | 0.11 | 0.02 | 0.03 | 0     | 0    | 0.11  | 0.11 | 0.03  | 0.03 |
| 6                 | 0.88 | 0.11 | 0.02 | 0.03 | 0     | 0    | 0.08  | 0.1  | 0.03  | 0.03 |
| 7                 | 0.91 | 0.1  | 0.02 | 0.03 | 0     | 0    | 0.05  | 0.09 | 0.03  | 0.03 |
| 8                 | 0.91 | 0.1  | 0.02 | 0.03 | 0     | 0    | 0.05  | 0.09 | 0.02  | 0.03 |
| 9                 | 0.91 | 0.1  | 0.02 | 0.03 | 0     | 0    | 0.05  | 0.09 | 0.02  | 0.03 |
| 10                | 0.93 | 0.09 | 0.01 | 0.03 | 0     | 0    | 0.04  | 0.08 | 0.02  | 0.03 |
| 11                | 0.93 | 0.09 | 0.01 | 0.03 | 0     | 0    | 0.04  | 0.08 | 0.02  | 0.03 |
| 12                | 0.93 | 0.09 | 0.01 | 0.03 | 0     | 0    | 0.04  | 0.08 | 0.02  | 0.03 |

**age=30 years, timing allo <6 months, cmv=others, donor=MRD, graft=BM, TBI=TBI, In vivo Tcell depletion=no,**

| Landmark time (y) | GRFS | se   | GF   | se   | AGVHD | se   | CGVHD | se   | Death | se   |
|-------------------|------|------|------|------|-------|------|-------|------|-------|------|
| 0                 | 0.64 | 0.12 | 0.04 | 0.03 | 0.08  | 0.06 | 0.14  | 0.11 | 0.1   | 0.05 |
| 1                 | 0.66 | 0.13 | 0.04 | 0.03 | 0.06  | 0.06 | 0.15  | 0.11 | 0.09  | 0.05 |
| 2                 | 0.7  | 0.14 | 0.04 | 0.03 | 0.01  | 0.03 | 0.17  | 0.13 | 0.09  | 0.05 |
| 3                 | 0.72 | 0.14 | 0.04 | 0.03 | 0     | 0    | 0.17  | 0.14 | 0.07  | 0.05 |
| 4                 | 0.77 | 0.15 | 0.02 | 0.03 | 0     | 0    | 0.15  | 0.14 | 0.06  | 0.05 |
| 5                 | 0.79 | 0.15 | 0.02 | 0.03 | 0     | 0    | 0.15  | 0.14 | 0.04  | 0.05 |
| 6                 | 0.83 | 0.14 | 0.02 | 0.03 | 0     | 0    | 0.11  | 0.14 | 0.04  | 0.05 |
| 7                 | 0.88 | 0.13 | 0.02 | 0.03 | 0     | 0    | 0.07  | 0.12 | 0.04  | 0.05 |
| 8                 | 0.88 | 0.13 | 0.02 | 0.03 | 0     | 0    | 0.07  | 0.12 | 0.03  | 0.04 |
| 9                 | 0.88 | 0.13 | 0.02 | 0.03 | 0     | 0    | 0.07  | 0.12 | 0.03  | 0.05 |
| 10                | 0.9  | 0.12 | 0.02 | 0.03 | 0     | 0    | 0.05  | 0.11 | 0.03  | 0.04 |
| 11                | 0.9  | 0.12 | 0.02 | 0.03 | 0     | 0    | 0.05  | 0.11 | 0.03  | 0.04 |
| 12                | 0.9  | 0.12 | 0.01 | 0.03 | 0     | 0    | 0.05  | 0.11 | 0.03  | 0.04 |

**age=40 years, timing allo <6 months, cmv=others, donor=MRD, graft=BM, TBI=TBI, In vivo Tcell depletion=no,**

| Landmark time (y) | GRFS | se   | GF   | se   | AGVHD | se   | CGVHD | se   | Death | se   |
|-------------------|------|------|------|------|-------|------|-------|------|-------|------|
| 0                 | 0.53 | 0.15 | 0.05 | 0.03 | 0.11  | 0.08 | 0.18  | 0.14 | 0.13  | 0.06 |
| 1                 | 0.56 | 0.16 | 0.05 | 0.03 | 0.09  | 0.08 | 0.19  | 0.15 | 0.11  | 0.06 |
| 2                 | 0.6  | 0.17 | 0.04 | 0.03 | 0.02  | 0.05 | 0.23  | 0.17 | 0.12  | 0.07 |
| 3                 | 0.63 | 0.18 | 0.04 | 0.04 | 0     | 0    | 0.23  | 0.18 | 0.1   | 0.07 |
| 4                 | 0.69 | 0.19 | 0.03 | 0.03 | 0     | 0    | 0.21  | 0.19 | 0.08  | 0.07 |
| 5                 | 0.71 | 0.19 | 0.02 | 0.03 | 0     | 0    | 0.21  | 0.19 | 0.06  | 0.06 |
| 6                 | 0.77 | 0.19 | 0.02 | 0.03 | 0     | 0    | 0.16  | 0.19 | 0.05  | 0.06 |
| 7                 | 0.83 | 0.18 | 0.02 | 0.03 | 0     | 0    | 0.1   | 0.17 | 0.05  | 0.06 |
| 8                 | 0.83 | 0.18 | 0.02 | 0.03 | 0     | 0    | 0.1   | 0.17 | 0.05  | 0.06 |

|    |      |      |      |      |   |   |      |      |      |      |
|----|------|------|------|------|---|---|------|------|------|------|
| 9  | 0.83 | 0.18 | 0.02 | 0.03 | 0 | 0 | 0.1  | 0.17 | 0.05 | 0.06 |
| 10 | 0.86 | 0.17 | 0.02 | 0.03 | 0 | 0 | 0.08 | 0.16 | 0.04 | 0.06 |
| 11 | 0.87 | 0.17 | 0.02 | 0.03 | 0 | 0 | 0.08 | 0.16 | 0.04 | 0.06 |
| 12 | 0.87 | 0.17 | 0.01 | 0.03 | 0 | 0 | 0.08 | 0.16 | 0.04 | 0.06 |

**age=50 years, timing allo <6 months, cmv=others, donor=MRD, graft=BM, TBI=TBI, In vivo Tcell depletion=no,**

| Landmark time (y) | GRFS | se   | GF   | se   | AGVHD | se   | CGVHD | se   | Death | se   |
|-------------------|------|------|------|------|-------|------|-------|------|-------|------|
| 0                 | 0.4  | 0.17 | 0.05 | 0.03 | 0.15  | 0.11 | 0.23  | 0.17 | 0.17  | 0.08 |
| 1                 | 0.43 | 0.18 | 0.05 | 0.03 | 0.12  | 0.11 | 0.25  | 0.18 | 0.15  | 0.08 |
| 2                 | 0.48 | 0.21 | 0.04 | 0.04 | 0.02  | 0.07 | 0.31  | 0.22 | 0.15  | 0.09 |
| 3                 | 0.51 | 0.22 | 0.04 | 0.04 | 0     | 0    | 0.31  | 0.23 | 0.14  | 0.09 |
| 4                 | 0.59 | 0.25 | 0.03 | 0.04 | 0     | 0    | 0.28  | 0.25 | 0.1   | 0.09 |
| 5                 | 0.61 | 0.25 | 0.02 | 0.03 | 0     | 0    | 0.29  | 0.26 | 0.08  | 0.08 |
| 6                 | 0.68 | 0.26 | 0.02 | 0.03 | 0     | 0    | 0.22  | 0.27 | 0.07  | 0.09 |
| 7                 | 0.77 | 0.25 | 0.02 | 0.04 | 0     | 0    | 0.14  | 0.25 | 0.07  | 0.09 |
| 8                 | 0.77 | 0.25 | 0.02 | 0.04 | 0     | 0    | 0.14  | 0.25 | 0.07  | 0.09 |
| 9                 | 0.77 | 0.25 | 0.02 | 0.04 | 0     | 0    | 0.14  | 0.25 | 0.07  | 0.09 |
| 10                | 0.81 | 0.24 | 0.02 | 0.04 | 0     | 0    | 0.11  | 0.23 | 0.06  | 0.09 |
| 11                | 0.81 | 0.24 | 0.02 | 0.04 | 0     | 0    | 0.11  | 0.24 | 0.06  | 0.08 |
| 12                | 0.81 | 0.24 | 0.02 | 0.03 | 0     | 0    | 0.11  | 0.24 | 0.06  | 0.08 |

**age=10 years, timing allo >6 months, cmv=D-/R-, donor=UD, graft=BM, TBI=TBI, In vivo Tcell depletion=no,**

| Landmark time (y) | GRFS | se   | GF   | se   | AGVHD | se   | CGVHD | se   | Death | se   |
|-------------------|------|------|------|------|-------|------|-------|------|-------|------|
| 0                 | 0.74 | 0.1  | 0.01 | 0.01 | 0.09  | 0.08 | 0.04  | 0.04 | 0.13  | 0.07 |
| 1                 | 0.77 | 0.1  | 0.01 | 0.01 | 0.07  | 0.08 | 0.04  | 0.04 | 0.11  | 0.07 |
| 2                 | 0.82 | 0.09 | 0.01 | 0.01 | 0.01  | 0.04 | 0.05  | 0.05 | 0.11  | 0.08 |
| 3                 | 0.85 | 0.09 | 0.01 | 0.01 | 0     | 0    | 0.05  | 0.05 | 0.1   | 0.07 |
| 4                 | 0.88 | 0.09 | 0    | 0.01 | 0     | 0    | 0.04  | 0.05 | 0.07  | 0.07 |
| 5                 | 0.9  | 0.08 | 0    | 0.01 | 0     | 0    | 0.04  | 0.05 | 0.06  | 0.07 |
| 6                 | 0.92 | 0.08 | 0    | 0.01 | 0     | 0    | 0.03  | 0.05 | 0.05  | 0.06 |
| 7                 | 0.93 | 0.07 | 0    | 0.01 | 0     | 0    | 0.02  | 0.04 | 0.05  | 0.06 |
| 8                 | 0.94 | 0.07 | 0    | 0.01 | 0     | 0    | 0.02  | 0.04 | 0.04  | 0.06 |
| 9                 | 0.93 | 0.07 | 0    | 0.01 | 0     | 0    | 0.02  | 0.04 | 0.04  | 0.06 |
| 10                | 0.94 | 0.07 | 0    | 0.01 | 0     | 0    | 0.01  | 0.04 | 0.04  | 0.06 |
| 11                | 0.95 | 0.07 | 0    | 0.01 | 0     | 0    | 0.01  | 0.04 | 0.04  | 0.06 |
| 12                | 0.95 | 0.07 | 0    | 0.01 | 0     | 0    | 0.01  | 0.04 | 0.04  | 0.06 |

**age=20 years, timing allo >6 months, cmv=D-/R-, donor=UD, graft=BM, TBI=TBI, In vivo Tcell depletion=no,**

| Landmark time (y) | GRFS | se   | GF   | se   | AGVHD | se   | CGVHD | se   | Death | se   |
|-------------------|------|------|------|------|-------|------|-------|------|-------|------|
| 0                 | 0.65 | 0.12 | 0.01 | 0.01 | 0.12  | 0.1  | 0.05  | 0.05 | 0.17  | 0.08 |
| 1                 | 0.69 | 0.12 | 0.01 | 0.01 | 0.1   | 0.1  | 0.06  | 0.05 | 0.15  | 0.09 |
| 2                 | 0.75 | 0.12 | 0.01 | 0.01 | 0.02  | 0.06 | 0.07  | 0.06 | 0.16  | 0.1  |
| 3                 | 0.79 | 0.11 | 0.01 | 0.01 | 0     | 0    | 0.07  | 0.07 | 0.14  | 0.1  |
| 4                 | 0.83 | 0.11 | 0    | 0.01 | 0     | 0    | 0.06  | 0.07 | 0.1   | 0.09 |

|    |      |      |   |      |   |   |      |      |      |      |
|----|------|------|---|------|---|---|------|------|------|------|
| 5  | 0.85 | 0.11 | 0 | 0.01 | 0 | 0 | 0.06 | 0.07 | 0.08 | 0.09 |
| 6  | 0.88 | 0.1  | 0 | 0.01 | 0 | 0 | 0.05 | 0.07 | 0.07 | 0.08 |
| 7  | 0.9  | 0.1  | 0 | 0.01 | 0 | 0 | 0.03 | 0.06 | 0.07 | 0.08 |
| 8  | 0.91 | 0.09 | 0 | 0.01 | 0 | 0 | 0.03 | 0.06 | 0.06 | 0.08 |
| 9  | 0.91 | 0.1  | 0 | 0.01 | 0 | 0 | 0.03 | 0.06 | 0.06 | 0.08 |
| 10 | 0.92 | 0.09 | 0 | 0.01 | 0 | 0 | 0.02 | 0.05 | 0.06 | 0.08 |
| 11 | 0.92 | 0.09 | 0 | 0.01 | 0 | 0 | 0.02 | 0.05 | 0.05 | 0.07 |
| 12 | 0.92 | 0.09 | 0 | 0.01 | 0 | 0 | 0.02 | 0.05 | 0.05 | 0.08 |

**age=30 years, timing allo >6 months, cmv=D-/R-, donor=UD, graft=BM, TBI=TBI, In vivo Tcell depletion=no,**

| Landmark time (y) | GRFS | se   | GF   | se   | AGVHD | se   | CGVHD | se   | Death | se   |
|-------------------|------|------|------|------|-------|------|-------|------|-------|------|
| 0                 | 0.54 | 0.13 | 0.01 | 0.01 | 0.16  | 0.12 | 0.07  | 0.06 | 0.23  | 0.1  |
| 1                 | 0.58 | 0.14 | 0.01 | 0.01 | 0.13  | 0.12 | 0.08  | 0.07 | 0.2   | 0.11 |
| 2                 | 0.66 | 0.14 | 0.01 | 0.01 | 0.03  | 0.07 | 0.1   | 0.08 | 0.21  | 0.12 |
| 3                 | 0.71 | 0.14 | 0.01 | 0.01 | 0     | 0    | 0.1   | 0.09 | 0.19  | 0.12 |
| 4                 | 0.77 | 0.14 | 0    | 0.01 | 0     | 0    | 0.09  | 0.09 | 0.14  | 0.12 |
| 5                 | 0.79 | 0.14 | 0    | 0.01 | 0     | 0    | 0.09  | 0.09 | 0.11  | 0.11 |
| 6                 | 0.83 | 0.14 | 0    | 0.01 | 0     | 0    | 0.07  | 0.09 | 0.1   | 0.11 |
| 7                 | 0.86 | 0.13 | 0    | 0.01 | 0     | 0    | 0.04  | 0.08 | 0.1   | 0.11 |
| 8                 | 0.87 | 0.13 | 0    | 0.01 | 0     | 0    | 0.04  | 0.08 | 0.09  | 0.11 |
| 9                 | 0.87 | 0.13 | 0    | 0.01 | 0     | 0    | 0.04  | 0.08 | 0.09  | 0.11 |
| 10                | 0.88 | 0.12 | 0    | 0.01 | 0     | 0    | 0.03  | 0.07 | 0.08  | 0.11 |
| 11                | 0.89 | 0.12 | 0    | 0.01 | 0     | 0    | 0.03  | 0.07 | 0.07  | 0.1  |
| 12                | 0.89 | 0.12 | 0    | 0.01 | 0     | 0    | 0.03  | 0.07 | 0.07  | 0.1  |

**age=40 years, timing allo >6 months, cmv=D-/R-, donor=UD, graft=BM, TBI=TBI, In vivo Tcell depletion=no,**

| Landmark time (y) | GRFS | se   | GF   | se   | AGVHD | se   | CGVHD | se   | Death | se   |
|-------------------|------|------|------|------|-------|------|-------|------|-------|------|
| 0                 | 0.41 | 0.14 | 0.01 | 0.01 | 0.21  | 0.15 | 0.08  | 0.07 | 0.29  | 0.12 |
| 1                 | 0.46 | 0.16 | 0.01 | 0.01 | 0.18  | 0.16 | 0.1   | 0.08 | 0.26  | 0.13 |
| 2                 | 0.55 | 0.17 | 0.01 | 0.01 | 0.04  | 0.1  | 0.13  | 0.1  | 0.28  | 0.15 |
| 3                 | 0.6  | 0.17 | 0.01 | 0.01 | 0     | 0    | 0.13  | 0.11 | 0.26  | 0.16 |
| 4                 | 0.68 | 0.18 | 0.01 | 0.01 | 0     | 0    | 0.12  | 0.12 | 0.2   | 0.16 |
| 5                 | 0.71 | 0.18 | 0    | 0.01 | 0     | 0    | 0.13  | 0.13 | 0.16  | 0.15 |
| 6                 | 0.76 | 0.18 | 0    | 0.01 | 0     | 0    | 0.09  | 0.12 | 0.14  | 0.15 |
| 7                 | 0.8  | 0.17 | 0    | 0.01 | 0     | 0    | 0.06  | 0.11 | 0.13  | 0.15 |
| 8                 | 0.82 | 0.17 | 0    | 0.01 | 0     | 0    | 0.06  | 0.11 | 0.12  | 0.14 |
| 9                 | 0.81 | 0.17 | 0    | 0.01 | 0     | 0    | 0.06  | 0.11 | 0.13  | 0.15 |
| 10                | 0.84 | 0.17 | 0    | 0.01 | 0     | 0    | 0.04  | 0.1  | 0.12  | 0.14 |
| 11                | 0.85 | 0.17 | 0    | 0.01 | 0     | 0    | 0.05  | 0.1  | 0.1   | 0.14 |
| 12                | 0.85 | 0.17 | 0    | 0.01 | 0     | 0    | 0.05  | 0.1  | 0.11  | 0.14 |

**age=50 years, timing allo >6 months, cmv=D-/R-, donor=UD, graft=BM, TBI=TBI, In vivo Tcell depletion=no,**

| Landmark time (y) | GRFS | se   | GF   | se   | AGVHD | se   | CGVHD | se   | Death | se   |
|-------------------|------|------|------|------|-------|------|-------|------|-------|------|
| 0                 | 0.27 | 0.14 | 0.01 | 0.01 | 0.28  | 0.18 | 0.09  | 0.08 | 0.35  | 0.14 |

|    |      |      |      |      |      |      |      |      |      |      |
|----|------|------|------|------|------|------|------|------|------|------|
| 1  | 0.32 | 0.16 | 0.01 | 0.01 | 0.24 | 0.21 | 0.11 | 0.1  | 0.31 | 0.16 |
| 2  | 0.41 | 0.19 | 0.01 | 0.01 | 0.05 | 0.14 | 0.16 | 0.13 | 0.37 | 0.18 |
| 3  | 0.48 | 0.2  | 0.01 | 0.01 | 0    | 0    | 0.17 | 0.15 | 0.34 | 0.19 |
| 4  | 0.57 | 0.23 | 0.01 | 0.01 | 0    | 0    | 0.16 | 0.16 | 0.26 | 0.2  |
| 5  | 0.61 | 0.23 | 0    | 0.01 | 0    | 0    | 0.18 | 0.18 | 0.21 | 0.19 |
| 6  | 0.67 | 0.24 | 0    | 0.01 | 0    | 0    | 0.13 | 0.17 | 0.19 | 0.2  |
| 7  | 0.73 | 0.24 | 0    | 0.01 | 0    | 0    | 0.08 | 0.15 | 0.19 | 0.2  |
| 8  | 0.74 | 0.23 | 0    | 0.01 | 0    | 0    | 0.08 | 0.15 | 0.17 | 0.2  |
| 9  | 0.74 | 0.24 | 0    | 0.01 | 0    | 0    | 0.08 | 0.16 | 0.18 | 0.2  |
| 10 | 0.77 | 0.23 | 0    | 0.01 | 0    | 0    | 0.06 | 0.14 | 0.16 | 0.2  |
| 11 | 0.79 | 0.23 | 0    | 0.01 | 0    | 0    | 0.07 | 0.15 | 0.14 | 0.19 |
| 12 | 0.78 | 0.23 | 0    | 0.01 | 0    | 0    | 0.07 | 0.15 | 0.15 | 0.2  |

**age=10 years, timing allo <6 months, cmv=D-/R-, donor=UD, graft=BM, TBI=TBI, In vivo Tcell depletion=no,**

| Landmark time (y) | GRFS | se   | GF   | se   | AGVHD | se   | CGVHD | se   | Death | se   |
|-------------------|------|------|------|------|-------|------|-------|------|-------|------|
| 0                 | 0.65 | 0.15 | 0.01 | 0.01 | 0.16  | 0.14 | 0.08  | 0.08 | 0.1   | 0.06 |
| 1                 | 0.69 | 0.15 | 0.01 | 0.01 | 0.13  | 0.15 | 0.09  | 0.09 | 0.09  | 0.06 |
| 2                 | 0.77 | 0.14 | 0.01 | 0.01 | 0.02  | 0.08 | 0.11  | 0.1  | 0.09  | 0.07 |
| 3                 | 0.8  | 0.12 | 0.01 | 0.01 | 0     | 0    | 0.11  | 0.11 | 0.08  | 0.07 |
| 4                 | 0.84 | 0.12 | 0    | 0.01 | 0     | 0    | 0.1   | 0.11 | 0.06  | 0.06 |
| 5                 | 0.85 | 0.12 | 0    | 0.01 | 0     | 0    | 0.1   | 0.11 | 0.05  | 0.06 |
| 6                 | 0.88 | 0.12 | 0    | 0.01 | 0     | 0    | 0.07  | 0.11 | 0.04  | 0.06 |
| 7                 | 0.91 | 0.1  | 0    | 0.01 | 0     | 0    | 0.04  | 0.09 | 0.04  | 0.06 |
| 8                 | 0.92 | 0.1  | 0    | 0.01 | 0     | 0    | 0.04  | 0.09 | 0.04  | 0.05 |
| 9                 | 0.92 | 0.1  | 0    | 0.01 | 0     | 0    | 0.04  | 0.09 | 0.04  | 0.06 |
| 10                | 0.93 | 0.1  | 0    | 0.01 | 0     | 0    | 0.03  | 0.08 | 0.03  | 0.05 |
| 11                | 0.93 | 0.1  | 0    | 0.01 | 0     | 0    | 0.03  | 0.08 | 0.03  | 0.05 |
| 12                | 0.93 | 0.1  | 0    | 0.01 | 0     | 0    | 0.03  | 0.08 | 0.03  | 0.05 |

**age=20 years, timing allo <6 months, cmv=D-/R-, donor=UD, graft=BM, TBI=TBI, In vivo Tcell depletion=no,**

| Landmark time (y) | GRFS | se   | GF   | se   | AGVHD | se   | CGVHD | se   | Death | se   |
|-------------------|------|------|------|------|-------|------|-------|------|-------|------|
| 0                 | 0.54 | 0.17 | 0.01 | 0.01 | 0.21  | 0.18 | 0.11  | 0.1  | 0.13  | 0.07 |
| 1                 | 0.58 | 0.18 | 0.01 | 0.01 | 0.18  | 0.19 | 0.12  | 0.11 | 0.12  | 0.08 |
| 2                 | 0.68 | 0.17 | 0.01 | 0.01 | 0.03  | 0.11 | 0.15  | 0.13 | 0.13  | 0.09 |
| 3                 | 0.73 | 0.16 | 0.01 | 0.01 | 0     | 0    | 0.15  | 0.14 | 0.12  | 0.09 |
| 4                 | 0.78 | 0.16 | 0    | 0.01 | 0     | 0    | 0.13  | 0.15 | 0.09  | 0.08 |
| 5                 | 0.79 | 0.16 | 0    | 0.01 | 0     | 0    | 0.14  | 0.15 | 0.07  | 0.08 |
| 6                 | 0.84 | 0.16 | 0    | 0.01 | 0     | 0    | 0.1   | 0.14 | 0.06  | 0.08 |
| 7                 | 0.88 | 0.14 | 0    | 0.01 | 0     | 0    | 0.06  | 0.12 | 0.06  | 0.08 |
| 8                 | 0.88 | 0.14 | 0    | 0.01 | 0     | 0    | 0.06  | 0.13 | 0.05  | 0.07 |
| 9                 | 0.88 | 0.14 | 0    | 0.01 | 0     | 0    | 0.06  | 0.13 | 0.05  | 0.08 |
| 10                | 0.9  | 0.13 | 0    | 0.01 | 0     | 0    | 0.05  | 0.11 | 0.05  | 0.07 |
| 11                | 0.9  | 0.13 | 0    | 0.01 | 0     | 0    | 0.05  | 0.12 | 0.04  | 0.07 |
| 12                | 0.9  | 0.13 | 0    | 0.01 | 0     | 0    | 0.05  | 0.12 | 0.04  | 0.07 |

**age=30 years, timing allo <6 months, cmv=D-/R-, donor=UD, graft=BM, TBI=TBI, In vivo Tcell depletion=no,**

| Landmark time (y) | GRFS | se   | GF   | se   | AGVHD | se   | CGVHD | se   | Death | se   |
|-------------------|------|------|------|------|-------|------|-------|------|-------|------|
| 0                 | 0.41 | 0.18 | 0.01 | 0.01 | 0.29  | 0.22 | 0.13  | 0.12 | 0.17  | 0.09 |
| 1                 | 0.46 | 0.2  | 0.01 | 0.01 | 0.24  | 0.24 | 0.15  | 0.13 | 0.15  | 0.1  |
| 2                 | 0.57 | 0.2  | 0.01 | 0.01 | 0.05  | 0.16 | 0.2   | 0.17 | 0.17  | 0.11 |
| 3                 | 0.63 | 0.2  | 0.01 | 0.01 | 0     | 0    | 0.21  | 0.18 | 0.16  | 0.12 |
| 4                 | 0.69 | 0.21 | 0    | 0.01 | 0     | 0    | 0.19  | 0.2  | 0.12  | 0.11 |
| 5                 | 0.71 | 0.21 | 0    | 0.01 | 0     | 0    | 0.19  | 0.2  | 0.09  | 0.1  |
| 6                 | 0.77 | 0.21 | 0    | 0.01 | 0     | 0    | 0.15  | 0.2  | 0.08  | 0.1  |
| 7                 | 0.83 | 0.2  | 0    | 0.01 | 0     | 0    | 0.09  | 0.17 | 0.08  | 0.11 |
| 8                 | 0.83 | 0.2  | 0    | 0.01 | 0     | 0    | 0.09  | 0.18 | 0.07  | 0.1  |
| 9                 | 0.83 | 0.2  | 0    | 0.01 | 0     | 0    | 0.09  | 0.18 | 0.08  | 0.1  |
| 10                | 0.86 | 0.19 | 0    | 0.01 | 0     | 0    | 0.07  | 0.16 | 0.07  | 0.1  |
| 11                | 0.86 | 0.18 | 0    | 0.01 | 0     | 0    | 0.07  | 0.16 | 0.06  | 0.1  |
| 12                | 0.86 | 0.19 | 0    | 0.01 | 0     | 0    | 0.07  | 0.17 | 0.06  | 0.1  |

**age=40 years, timing allo <6 months, cmv=D-/R-, donor=UD, graft=BM, TBI=TBI, In vivo Tcell depletion=no,**

| Landmark time (y) | GRFS | se   | GF   | se   | AGVHD | se   | CGVHD | se   | Death | se   |
|-------------------|------|------|------|------|-------|------|-------|------|-------|------|
| 0                 | 0.28 | 0.18 | 0.01 | 0.01 | 0.37  | 0.27 | 0.15  | 0.14 | 0.2   | 0.11 |
| 1                 | 0.32 | 0.21 | 0.01 | 0.01 | 0.32  | 0.31 | 0.17  | 0.16 | 0.18  | 0.13 |
| 2                 | 0.44 | 0.24 | 0.01 | 0.01 | 0.07  | 0.22 | 0.26  | 0.22 | 0.23  | 0.15 |
| 3                 | 0.5  | 0.24 | 0.01 | 0.01 | 0     | 0    | 0.28  | 0.23 | 0.21  | 0.15 |
| 4                 | 0.58 | 0.26 | 0    | 0.01 | 0     | 0    | 0.26  | 0.26 | 0.16  | 0.15 |
| 5                 | 0.61 | 0.27 | 0    | 0.01 | 0     | 0    | 0.27  | 0.27 | 0.12  | 0.14 |
| 6                 | 0.68 | 0.28 | 0    | 0.01 | 0     | 0    | 0.2   | 0.27 | 0.11  | 0.14 |
| 7                 | 0.76 | 0.27 | 0    | 0.01 | 0     | 0    | 0.13  | 0.25 | 0.11  | 0.15 |
| 8                 | 0.76 | 0.27 | 0    | 0.01 | 0     | 0    | 0.13  | 0.25 | 0.1   | 0.14 |
| 9                 | 0.76 | 0.27 | 0    | 0.01 | 0     | 0    | 0.13  | 0.25 | 0.11  | 0.15 |
| 10                | 0.8  | 0.26 | 0    | 0.01 | 0     | 0    | 0.1   | 0.24 | 0.1   | 0.14 |
| 11                | 0.81 | 0.26 | 0    | 0.01 | 0     | 0    | 0.1   | 0.24 | 0.09  | 0.14 |
| 12                | 0.81 | 0.26 | 0    | 0.01 | 0     | 0    | 0.1   | 0.24 | 0.09  | 0.14 |

**age=50 years, timing allo <6 months, cmv=D-/R-, donor=UD, graft=BM, TBI=TBI, In vivo Tcell depletion=no,**

| Landmark time (y) | GRFS | se   | GF   | se   | AGVHD | se   | CGVHD | se   | Death | se   |
|-------------------|------|------|------|------|-------|------|-------|------|-------|------|
| 0                 | 0.16 | 0.15 | 0    | 0.01 | 0.47  | 0.32 | 0.14  | 0.15 | 0.23  | 0.14 |
| 1                 | 0.2  | 0.19 | 0.01 | 0.01 | 0.41  | 0.39 | 0.18  | 0.19 | 0.21  | 0.16 |
| 2                 | 0.3  | 0.25 | 0.01 | 0.01 | 0.09  | 0.32 | 0.32  | 0.26 | 0.28  | 0.2  |
| 3                 | 0.37 | 0.27 | 0.01 | 0.01 | 0     | 0    | 0.35  | 0.29 | 0.28  | 0.2  |
| 4                 | 0.45 | 0.32 | 0    | 0.01 | 0     | 0    | 0.34  | 0.33 | 0.21  | 0.2  |
| 5                 | 0.48 | 0.33 | 0    | 0.01 | 0     | 0    | 0.36  | 0.35 | 0.16  | 0.18 |
| 6                 | 0.57 | 0.37 | 0    | 0.01 | 0     | 0    | 0.28  | 0.37 | 0.15  | 0.19 |
| 7                 | 0.66 | 0.37 | 0    | 0.01 | 0     | 0    | 0.18  | 0.35 | 0.16  | 0.21 |
| 8                 | 0.67 | 0.37 | 0    | 0.01 | 0     | 0    | 0.18  | 0.36 | 0.14  | 0.2  |



|    |      |      |   |      |   |   |      |      |      |      |
|----|------|------|---|------|---|---|------|------|------|------|
| 9  | 0.67 | 0.37 | 0 | 0.01 | 0 | 0 | 0.18 | 0.36 | 0.14 | 0.2  |
| 10 | 0.72 | 0.36 | 0 | 0.01 | 0 | 0 | 0.14 | 0.34 | 0.14 | 0.2  |
| 11 | 0.73 | 0.37 | 0 | 0.01 | 0 | 0 | 0.15 | 0.35 | 0.12 | 0.19 |
| 12 | 0.73 | 0.37 | 0 | 0.01 | 0 | 0 | 0.15 | 0.35 | 0.12 | 0.2  |

**age=10 years, timing allo >6 months, cmv=others, donor=UD, graft=BM, TBI=TBI, In vivo Tcell depletion=no,**

| Landmark time (y) | GRFS | se   | GF   | se   | AGVHD | se   | CGVHD | se   | Death | se   |
|-------------------|------|------|------|------|-------|------|-------|------|-------|------|
| 0                 | 0.68 | 0.14 | 0.03 | 0.03 | 0.16  | 0.14 | 0.03  | 0.03 | 0.1   | 0.06 |
| 1                 | 0.72 | 0.14 | 0.03 | 0.03 | 0.13  | 0.15 | 0.03  | 0.03 | 0.09  | 0.06 |
| 2                 | 0.82 | 0.11 | 0.03 | 0.03 | 0.02  | 0.09 | 0.04  | 0.04 | 0.09  | 0.06 |
| 3                 | 0.85 | 0.08 | 0.03 | 0.03 | 0     | 0    | 0.04  | 0.04 | 0.08  | 0.06 |
| 4                 | 0.89 | 0.08 | 0.02 | 0.03 | 0     | 0    | 0.03  | 0.04 | 0.06  | 0.06 |
| 5                 | 0.9  | 0.07 | 0.01 | 0.03 | 0     | 0    | 0.03  | 0.04 | 0.05  | 0.06 |
| 6                 | 0.92 | 0.07 | 0.01 | 0.03 | 0     | 0    | 0.03  | 0.04 | 0.04  | 0.05 |
| 7                 | 0.93 | 0.07 | 0.01 | 0.03 | 0     | 0    | 0.02  | 0.03 | 0.04  | 0.05 |
| 8                 | 0.94 | 0.07 | 0.01 | 0.03 | 0     | 0    | 0.02  | 0.03 | 0.04  | 0.05 |
| 9                 | 0.93 | 0.07 | 0.01 | 0.03 | 0     | 0    | 0.02  | 0.03 | 0.04  | 0.05 |
| 10                | 0.94 | 0.06 | 0.01 | 0.03 | 0     | 0    | 0.01  | 0.03 | 0.03  | 0.05 |
| 11                | 0.95 | 0.06 | 0.01 | 0.03 | 0     | 0    | 0.01  | 0.03 | 0.03  | 0.05 |
| 12                | 0.95 | 0.06 | 0.01 | 0.02 | 0     | 0    | 0.01  | 0.03 | 0.03  | 0.05 |

**age=20 years, timing allo >6 months, cmv=others, donor=UD, graft=BM, TBI=TBI, In vivo Tcell depletion=no,**

| Landmark time (y) | GRFS | se   | GF   | se   | AGVHD | se   | CGVHD | se   | Death | se   |
|-------------------|------|------|------|------|-------|------|-------|------|-------|------|
| 0                 | 0.58 | 0.15 | 0.03 | 0.03 | 0.22  | 0.17 | 0.04  | 0.04 | 0.13  | 0.07 |
| 1                 | 0.63 | 0.16 | 0.03 | 0.03 | 0.18  | 0.17 | 0.04  | 0.04 | 0.12  | 0.07 |
| 2                 | 0.75 | 0.13 | 0.03 | 0.03 | 0.03  | 0.11 | 0.06  | 0.05 | 0.13  | 0.08 |
| 3                 | 0.8  | 0.1  | 0.03 | 0.03 | 0     | 0    | 0.05  | 0.05 | 0.12  | 0.08 |
| 4                 | 0.84 | 0.09 | 0.02 | 0.03 | 0     | 0    | 0.05  | 0.05 | 0.09  | 0.08 |
| 5                 | 0.87 | 0.09 | 0.02 | 0.03 | 0     | 0    | 0.05  | 0.05 | 0.07  | 0.07 |
| 6                 | 0.89 | 0.09 | 0.01 | 0.03 | 0     | 0    | 0.04  | 0.05 | 0.06  | 0.07 |
| 7                 | 0.91 | 0.08 | 0.01 | 0.03 | 0     | 0    | 0.02  | 0.04 | 0.06  | 0.07 |
| 8                 | 0.91 | 0.08 | 0.01 | 0.03 | 0     | 0    | 0.02  | 0.04 | 0.05  | 0.07 |
| 9                 | 0.91 | 0.08 | 0.02 | 0.03 | 0     | 0    | 0.02  | 0.04 | 0.05  | 0.07 |
| 10                | 0.92 | 0.08 | 0.01 | 0.03 | 0     | 0    | 0.02  | 0.04 | 0.05  | 0.07 |
| 11                | 0.93 | 0.08 | 0.01 | 0.03 | 0     | 0    | 0.02  | 0.04 | 0.04  | 0.06 |
| 12                | 0.93 | 0.08 | 0.01 | 0.03 | 0     | 0    | 0.02  | 0.04 | 0.04  | 0.07 |

**age=30 years, timing allo >6 months, cmv=others, donor=UD, graft=BM, TBI=TBI, In vivo Tcell depletion=no,**

| Landmark time (y) | GRFS | se   | GF   | se   | AGVHD | se   | CGVHD | se   | Death | se   |
|-------------------|------|------|------|------|-------|------|-------|------|-------|------|
| 0                 | 0.47 | 0.15 | 0.03 | 0.02 | 0.29  | 0.19 | 0.05  | 0.04 | 0.17  | 0.08 |
| 1                 | 0.53 | 0.17 | 0.03 | 0.03 | 0.24  | 0.2  | 0.05  | 0.05 | 0.15  | 0.09 |
| 2                 | 0.67 | 0.15 | 0.03 | 0.03 | 0.05  | 0.13 | 0.08  | 0.06 | 0.18  | 0.1  |
| 3                 | 0.73 | 0.12 | 0.03 | 0.03 | 0     | 0    | 0.08  | 0.07 | 0.16  | 0.1  |
| 4                 | 0.79 | 0.12 | 0.02 | 0.03 | 0     | 0    | 0.07  | 0.07 | 0.12  | 0.1  |

|    |      |      |      |      |   |   |      |      |      |      |
|----|------|------|------|------|---|---|------|------|------|------|
| 5  | 0.81 | 0.12 | 0.02 | 0.03 | 0 | 0 | 0.07 | 0.07 | 0.1  | 0.09 |
| 6  | 0.85 | 0.11 | 0.02 | 0.03 | 0 | 0 | 0.05 | 0.07 | 0.09 | 0.09 |
| 7  | 0.87 | 0.11 | 0.02 | 0.03 | 0 | 0 | 0.03 | 0.06 | 0.08 | 0.09 |
| 8  | 0.88 | 0.11 | 0.02 | 0.03 | 0 | 0 | 0.03 | 0.06 | 0.07 | 0.09 |
| 9  | 0.88 | 0.11 | 0.02 | 0.03 | 0 | 0 | 0.03 | 0.06 | 0.07 | 0.09 |
| 10 | 0.89 | 0.1  | 0.01 | 0.03 | 0 | 0 | 0.02 | 0.05 | 0.07 | 0.09 |
| 11 | 0.9  | 0.1  | 0.01 | 0.03 | 0 | 0 | 0.03 | 0.05 | 0.06 | 0.08 |
| 12 | 0.9  | 0.1  | 0.01 | 0.03 | 0 | 0 | 0.03 | 0.05 | 0.06 | 0.09 |

**age=40 years, timing allo >6 months, cmv=others, donor=UD, graft=BM, TBI=TBI, In vivo Tcell depletion=no,**

| Landmark time (y) | GRFS | se   | GF   | se   | AGVHD | se   | CGVHD | se   | Death | se   |
|-------------------|------|------|------|------|-------|------|-------|------|-------|------|
| 0                 | 0.34 | 0.15 | 0.03 | 0.02 | 0.37  | 0.21 | 0.05  | 0.05 | 0.2   | 0.09 |
| 1                 | 0.4  | 0.17 | 0.03 | 0.03 | 0.32  | 0.24 | 0.06  | 0.06 | 0.18  | 0.1  |
| 2                 | 0.56 | 0.17 | 0.03 | 0.03 | 0.07  | 0.17 | 0.1   | 0.08 | 0.24  | 0.13 |
| 3                 | 0.64 | 0.14 | 0.04 | 0.04 | 0     | 0    | 0.11  | 0.09 | 0.22  | 0.13 |
| 4                 | 0.71 | 0.15 | 0.02 | 0.03 | 0     | 0    | 0.1   | 0.09 | 0.17  | 0.13 |
| 5                 | 0.75 | 0.15 | 0.02 | 0.03 | 0     | 0    | 0.1   | 0.1  | 0.13  | 0.12 |
| 6                 | 0.79 | 0.15 | 0.02 | 0.03 | 0     | 0    | 0.08  | 0.09 | 0.12  | 0.12 |
| 7                 | 0.82 | 0.14 | 0.02 | 0.03 | 0     | 0    | 0.05  | 0.08 | 0.11  | 0.12 |
| 8                 | 0.83 | 0.14 | 0.02 | 0.03 | 0     | 0    | 0.05  | 0.08 | 0.1   | 0.12 |
| 9                 | 0.83 | 0.14 | 0.02 | 0.03 | 0     | 0    | 0.05  | 0.08 | 0.11  | 0.12 |
| 10                | 0.85 | 0.14 | 0.02 | 0.03 | 0     | 0    | 0.04  | 0.07 | 0.1   | 0.12 |
| 11                | 0.86 | 0.13 | 0.02 | 0.03 | 0     | 0    | 0.04  | 0.07 | 0.09  | 0.11 |
| 12                | 0.86 | 0.14 | 0.01 | 0.03 | 0     | 0    | 0.04  | 0.07 | 0.09  | 0.12 |

**age=50 years, timing allo >6 months, cmv=others, donor=UD, graft=BM, TBI=TBI, In vivo Tcell depletion=no,**

| Landmark time (y) | GRFS | se   | GF   | se   | AGVHD | se   | CGVHD | se   | Death | se   |
|-------------------|------|------|------|------|-------|------|-------|------|-------|------|
| 0                 | 0.22 | 0.13 | 0.03 | 0.02 | 0.47  | 0.23 | 0.06  | 0.05 | 0.23  | 0.11 |
| 1                 | 0.27 | 0.16 | 0.03 | 0.02 | 0.41  | 0.28 | 0.07  | 0.06 | 0.21  | 0.13 |
| 2                 | 0.44 | 0.19 | 0.03 | 0.03 | 0.09  | 0.23 | 0.13  | 0.1  | 0.31  | 0.16 |
| 3                 | 0.52 | 0.17 | 0.04 | 0.04 | 0     | 0    | 0.14  | 0.11 | 0.3   | 0.16 |
| 4                 | 0.61 | 0.19 | 0.02 | 0.04 | 0     | 0    | 0.13  | 0.12 | 0.23  | 0.17 |
| 5                 | 0.65 | 0.19 | 0.02 | 0.03 | 0     | 0    | 0.14  | 0.13 | 0.18  | 0.16 |
| 6                 | 0.71 | 0.19 | 0.02 | 0.03 | 0     | 0    | 0.11  | 0.13 | 0.16  | 0.16 |
| 7                 | 0.76 | 0.19 | 0.02 | 0.04 | 0     | 0    | 0.06  | 0.11 | 0.16  | 0.16 |
| 8                 | 0.77 | 0.19 | 0.02 | 0.04 | 0     | 0    | 0.06  | 0.11 | 0.15  | 0.16 |
| 9                 | 0.77 | 0.19 | 0.02 | 0.04 | 0     | 0    | 0.07  | 0.11 | 0.15  | 0.16 |
| 10                | 0.79 | 0.18 | 0.02 | 0.04 | 0     | 0    | 0.05  | 0.1  | 0.14  | 0.16 |
| 11                | 0.81 | 0.18 | 0.02 | 0.04 | 0     | 0    | 0.05  | 0.11 | 0.12  | 0.15 |
| 12                | 0.81 | 0.18 | 0.01 | 0.03 | 0     | 0    | 0.05  | 0.11 | 0.12  | 0.16 |

**age=10 years, timing allo <6 months, cmv=others, donor=UD, graft=BM, TBI=TBI, In vivo Tcell depletion=no,**

| Landmark time (y) | GRFS | se   | GF   | se   | AGVHD | se   | CGVHD | se   | Death | se   |
|-------------------|------|------|------|------|-------|------|-------|------|-------|------|
| 0                 | 0.56 | 0.19 | 0.02 | 0.02 | 0.28  | 0.22 | 0.06  | 0.06 | 0.07  | 0.04 |

|    |      |      |      |      |      |      |      |      |      |      |
|----|------|------|------|------|------|------|------|------|------|------|
| 1  | 0.61 | 0.2  | 0.03 | 0.02 | 0.23 | 0.24 | 0.06 | 0.06 | 0.07 | 0.05 |
| 2  | 0.77 | 0.16 | 0.02 | 0.03 | 0.05 | 0.15 | 0.09 | 0.08 | 0.08 | 0.06 |
| 3  | 0.82 | 0.1  | 0.03 | 0.03 | 0    | 0    | 0.09 | 0.08 | 0.07 | 0.06 |
| 4  | 0.86 | 0.1  | 0.02 | 0.02 | 0    | 0    | 0.08 | 0.08 | 0.05 | 0.05 |
| 5  | 0.87 | 0.1  | 0.01 | 0.02 | 0    | 0    | 0.08 | 0.09 | 0.04 | 0.05 |
| 6  | 0.9  | 0.09 | 0.01 | 0.02 | 0    | 0    | 0.06 | 0.08 | 0.04 | 0.05 |
| 7  | 0.92 | 0.08 | 0.01 | 0.02 | 0    | 0    | 0.03 | 0.07 | 0.03 | 0.05 |
| 8  | 0.92 | 0.08 | 0.01 | 0.02 | 0    | 0    | 0.03 | 0.07 | 0.03 | 0.04 |
| 9  | 0.92 | 0.08 | 0.01 | 0.02 | 0    | 0    | 0.03 | 0.07 | 0.03 | 0.05 |
| 10 | 0.93 | 0.08 | 0.01 | 0.02 | 0    | 0    | 0.03 | 0.06 | 0.03 | 0.04 |
| 11 | 0.94 | 0.08 | 0.01 | 0.02 | 0    | 0    | 0.03 | 0.06 | 0.03 | 0.04 |
| 12 | 0.94 | 0.08 | 0.01 | 0.02 | 0    | 0    | 0.03 | 0.06 | 0.03 | 0.04 |

**age=20 years, timing allo <6 months, cmv=others, donor=UD, graft=BM, TBI=TBI, In vivo Tcell depletion=no,**

| Landmark time (y) | GRFS | se   | GF   | se   | AGVHD | se   | CGVHD | se   | Death | se   |
|-------------------|------|------|------|------|-------|------|-------|------|-------|------|
| 0                 | 0.44 | 0.2  | 0.02 | 0.02 | 0.37  | 0.26 | 0.07  | 0.06 | 0.09  | 0.05 |
| 1                 | 0.5  | 0.22 | 0.03 | 0.02 | 0.31  | 0.28 | 0.08  | 0.07 | 0.08  | 0.06 |
| 2                 | 0.68 | 0.19 | 0.03 | 0.03 | 0.06  | 0.2  | 0.12  | 0.1  | 0.11  | 0.07 |
| 3                 | 0.75 | 0.12 | 0.03 | 0.03 | 0     | 0    | 0.12  | 0.11 | 0.1   | 0.07 |
| 4                 | 0.8  | 0.13 | 0.02 | 0.03 | 0     | 0    | 0.11  | 0.11 | 0.07  | 0.07 |
| 5                 | 0.82 | 0.13 | 0.01 | 0.02 | 0     | 0    | 0.11  | 0.11 | 0.06  | 0.06 |
| 6                 | 0.85 | 0.12 | 0.01 | 0.02 | 0     | 0    | 0.08  | 0.11 | 0.05  | 0.06 |
| 7                 | 0.89 | 0.11 | 0.01 | 0.02 | 0     | 0    | 0.05  | 0.09 | 0.05  | 0.06 |
| 8                 | 0.89 | 0.11 | 0.01 | 0.02 | 0     | 0    | 0.05  | 0.09 | 0.04  | 0.06 |
| 9                 | 0.89 | 0.11 | 0.01 | 0.03 | 0     | 0    | 0.05  | 0.09 | 0.04  | 0.06 |
| 10                | 0.91 | 0.1  | 0.01 | 0.02 | 0     | 0    | 0.04  | 0.09 | 0.04  | 0.06 |
| 11                | 0.91 | 0.1  | 0.01 | 0.02 | 0     | 0    | 0.04  | 0.09 | 0.04  | 0.06 |
| 12                | 0.91 | 0.1  | 0.01 | 0.02 | 0     | 0    | 0.04  | 0.09 | 0.04  | 0.06 |

**age=30 years, timing allo <6 months, cmv=others, donor=UD, graft=BM, TBI=TBI, In vivo Tcell depletion=no,**

| Landmark time (y) | GRFS | se   | GF   | se   | AGVHD | se   | CGVHD | se   | Death | se   |
|-------------------|------|------|------|------|-------|------|-------|------|-------|------|
| 0                 | 0.31 | 0.2  | 0.02 | 0.02 | 0.48  | 0.28 | 0.08  | 0.07 | 0.11  | 0.07 |
| 1                 | 0.37 | 0.23 | 0.02 | 0.02 | 0.41  | 0.33 | 0.09  | 0.09 | 0.1   | 0.08 |
| 2                 | 0.58 | 0.22 | 0.03 | 0.03 | 0.09  | 0.27 | 0.16  | 0.13 | 0.14  | 0.1  |
| 3                 | 0.66 | 0.16 | 0.03 | 0.03 | 0     | 0    | 0.17  | 0.14 | 0.14  | 0.1  |
| 4                 | 0.73 | 0.16 | 0.02 | 0.03 | 0     | 0    | 0.15  | 0.15 | 0.1   | 0.09 |
| 5                 | 0.75 | 0.16 | 0.02 | 0.03 | 0     | 0    | 0.16  | 0.15 | 0.08  | 0.09 |
| 6                 | 0.8  | 0.16 | 0.01 | 0.03 | 0     | 0    | 0.12  | 0.15 | 0.07  | 0.08 |
| 7                 | 0.85 | 0.15 | 0.01 | 0.03 | 0     | 0    | 0.07  | 0.13 | 0.07  | 0.09 |
| 8                 | 0.85 | 0.15 | 0.01 | 0.03 | 0     | 0    | 0.07  | 0.13 | 0.06  | 0.08 |
| 9                 | 0.85 | 0.15 | 0.02 | 0.03 | 0     | 0    | 0.07  | 0.13 | 0.06  | 0.08 |
| 10                | 0.87 | 0.14 | 0.01 | 0.03 | 0     | 0    | 0.06  | 0.12 | 0.06  | 0.08 |
| 11                | 0.88 | 0.14 | 0.01 | 0.03 | 0     | 0    | 0.06  | 0.12 | 0.05  | 0.08 |
| 12                | 0.88 | 0.14 | 0.01 | 0.02 | 0     | 0    | 0.06  | 0.12 | 0.05  | 0.08 |

**age=40 years, timing allo <6 months, cmv=others, donor=UD, graft=BM, TBI=TBI, In vivo Tcell depletion=no,**

| Landmark time (y) | GRFS | se   | GF   | se   | AGVHD | se   | CGVHD | se   | Death | se   |
|-------------------|------|------|------|------|-------|------|-------|------|-------|------|
| 0                 | 0.19 | 0.17 | 0.02 | 0.02 | 0.59  | 0.29 | 0.08  | 0.08 | 0.13  | 0.08 |
| 1                 | 0.25 | 0.21 | 0.02 | 0.02 | 0.52  | 0.37 | 0.1   | 0.11 | 0.11  | 0.1  |
| 2                 | 0.46 | 0.25 | 0.03 | 0.03 | 0.12  | 0.36 | 0.21  | 0.17 | 0.18  | 0.13 |
| 3                 | 0.56 | 0.19 | 0.03 | 0.03 | 0     | 0    | 0.23  | 0.18 | 0.18  | 0.12 |
| 4                 | 0.63 | 0.21 | 0.02 | 0.03 | 0     | 0    | 0.21  | 0.2  | 0.14  | 0.12 |
| 5                 | 0.66 | 0.21 | 0.02 | 0.03 | 0     | 0    | 0.22  | 0.2  | 0.11  | 0.11 |
| 6                 | 0.72 | 0.22 | 0.01 | 0.03 | 0     | 0    | 0.17  | 0.2  | 0.1   | 0.11 |
| 7                 | 0.79 | 0.2  | 0.02 | 0.03 | 0     | 0    | 0.1   | 0.18 | 0.1   | 0.12 |
| 8                 | 0.79 | 0.2  | 0.02 | 0.03 | 0     | 0    | 0.1   | 0.18 | 0.09  | 0.11 |
| 9                 | 0.79 | 0.21 | 0.02 | 0.03 | 0     | 0    | 0.1   | 0.18 | 0.09  | 0.12 |
| 10                | 0.82 | 0.2  | 0.01 | 0.03 | 0     | 0    | 0.08  | 0.17 | 0.08  | 0.12 |
| 11                | 0.83 | 0.19 | 0.01 | 0.03 | 0     | 0    | 0.08  | 0.17 | 0.07  | 0.11 |
| 12                | 0.83 | 0.2  | 0.01 | 0.03 | 0     | 0    | 0.08  | 0.17 | 0.07  | 0.11 |

**age=50 years, timing allo <6 months, cmv=others, donor=UD, graft=BM, TBI=TBI, In vivo Tcell depletion=no,**

| Landmark time (y) | GRFS | se   | GF   | se   | AGVHD | se   | CGVHD | se   | Death | se   |
|-------------------|------|------|------|------|-------|------|-------|------|-------|------|
| 0                 | 0.09 | 0.12 | 0.01 | 0.01 | 0.7   | 0.28 | 0.06  | 0.09 | 0.13  | 0.09 |
| 1                 | 0.13 | 0.17 | 0.02 | 0.02 | 0.64  | 0.39 | 0.09  | 0.12 | 0.11  | 0.12 |
| 2                 | 0.32 | 0.26 | 0.02 | 0.03 | 0.17  | 0.5  | 0.25  | 0.23 | 0.23  | 0.19 |
| 3                 | 0.43 | 0.23 | 0.03 | 0.04 | 0     | 0    | 0.3   | 0.23 | 0.24  | 0.16 |
| 4                 | 0.51 | 0.26 | 0.02 | 0.03 | 0     | 0    | 0.29  | 0.26 | 0.18  | 0.16 |
| 5                 | 0.54 | 0.27 | 0.02 | 0.03 | 0     | 0    | 0.3   | 0.27 | 0.14  | 0.15 |
| 6                 | 0.62 | 0.28 | 0.02 | 0.03 | 0     | 0    | 0.23  | 0.28 | 0.13  | 0.16 |
| 7                 | 0.71 | 0.28 | 0.02 | 0.03 | 0     | 0    | 0.14  | 0.26 | 0.13  | 0.17 |
| 8                 | 0.72 | 0.28 | 0.02 | 0.04 | 0     | 0    | 0.14  | 0.26 | 0.12  | 0.16 |
| 9                 | 0.71 | 0.28 | 0.02 | 0.04 | 0     | 0    | 0.15  | 0.26 | 0.12  | 0.16 |
| 10                | 0.75 | 0.27 | 0.02 | 0.03 | 0     | 0    | 0.12  | 0.25 | 0.12  | 0.16 |
| 11                | 0.76 | 0.27 | 0.02 | 0.04 | 0     | 0    | 0.12  | 0.25 | 0.1   | 0.15 |
| 12                | 0.76 | 0.28 | 0.01 | 0.03 | 0     | 0    | 0.12  | 0.25 | 0.1   | 0.16 |

**age=10 years, timing allo >6 months, cmv=D-/R-, donor=MRD, graft=PBSC, TBI=TBI, In vivo Tcell depletion=no,**

| Landmark time (y) | GRFS | se   | GF | se   | AGVHD | se   | CGVHD | se   | Death | se   |
|-------------------|------|------|----|------|-------|------|-------|------|-------|------|
| 0                 | 0.9  | 0.06 | 0  | 0.01 | 0.01  | 0.01 | 0.04  | 0.05 | 0.05  | 0.04 |
| 1                 | 0.91 | 0.06 | 0  | 0.01 | 0.01  | 0.01 | 0.04  | 0.05 | 0.04  | 0.04 |
| 2                 | 0.91 | 0.07 | 0  | 0.01 | 0     | 0.01 | 0.04  | 0.06 | 0.04  | 0.04 |
| 3                 | 0.92 | 0.07 | 0  | 0.01 | 0     | 0    | 0.04  | 0.06 | 0.03  | 0.04 |
| 4                 | 0.94 | 0.06 | 0  | 0.01 | 0     | 0    | 0.03  | 0.06 | 0.02  | 0.03 |
| 5                 | 0.94 | 0.06 | 0  | 0    | 0     | 0    | 0.03  | 0.06 | 0.02  | 0.03 |
| 6                 | 0.96 | 0.06 | 0  | 0    | 0     | 0    | 0.02  | 0.05 | 0.02  | 0.03 |
| 7                 | 0.97 | 0.05 | 0  | 0    | 0     | 0    | 0.02  | 0.04 | 0.02  | 0.03 |
| 8                 | 0.97 | 0.05 | 0  | 0    | 0     | 0    | 0.02  | 0.04 | 0.01  | 0.03 |

|    |      |      |   |      |   |   |      |      |      |      |
|----|------|------|---|------|---|---|------|------|------|------|
| 9  | 0.97 | 0.05 | 0 | 0.01 | 0 | 0 | 0.02 | 0.04 | 0.01 | 0.03 |
| 10 | 0.97 | 0.05 | 0 | 0    | 0 | 0 | 0.01 | 0.04 | 0.01 | 0.03 |
| 11 | 0.98 | 0.05 | 0 | 0    | 0 | 0 | 0.01 | 0.04 | 0.01 | 0.03 |
| 12 | 0.97 | 0.05 | 0 | 0    | 0 | 0 | 0.01 | 0.04 | 0.01 | 0.03 |

**age=20 years, timing allo >6 months, cmv=D-/R-, donor=MRD, graft=PBSC, TBI=TBI, In vivo Tcell depletion=no,**

| Landmark time (y) | GRFS | se   | GF | se   | AGVHD | se   | CGVHD | se   | Death | se   |
|-------------------|------|------|----|------|-------|------|-------|------|-------|------|
| 0                 | 0.86 | 0.08 | 0  | 0.01 | 0.01  | 0.01 | 0.05  | 0.07 | 0.07  | 0.05 |
| 1                 | 0.87 | 0.08 | 0  | 0.01 | 0.01  | 0.01 | 0.05  | 0.07 | 0.06  | 0.05 |
| 2                 | 0.88 | 0.09 | 0  | 0.01 | 0     | 0.01 | 0.06  | 0.07 | 0.06  | 0.05 |
| 3                 | 0.89 | 0.09 | 0  | 0.01 | 0     | 0    | 0.06  | 0.08 | 0.05  | 0.05 |
| 4                 | 0.91 | 0.09 | 0  | 0.01 | 0     | 0    | 0.05  | 0.08 | 0.04  | 0.04 |
| 5                 | 0.92 | 0.08 | 0  | 0.01 | 0     | 0    | 0.05  | 0.08 | 0.03  | 0.04 |
| 6                 | 0.94 | 0.08 | 0  | 0.01 | 0     | 0    | 0.04  | 0.07 | 0.02  | 0.04 |
| 7                 | 0.95 | 0.07 | 0  | 0.01 | 0     | 0    | 0.02  | 0.06 | 0.02  | 0.04 |
| 8                 | 0.96 | 0.07 | 0  | 0.01 | 0     | 0    | 0.02  | 0.06 | 0.02  | 0.04 |
| 9                 | 0.95 | 0.07 | 0  | 0.01 | 0     | 0    | 0.02  | 0.06 | 0.02  | 0.04 |
| 10                | 0.96 | 0.06 | 0  | 0.01 | 0     | 0    | 0.02  | 0.05 | 0.02  | 0.04 |
| 11                | 0.96 | 0.06 | 0  | 0.01 | 0     | 0    | 0.02  | 0.05 | 0.02  | 0.03 |
| 12                | 0.96 | 0.06 | 0  | 0    | 0     | 0    | 0.02  | 0.05 | 0.02  | 0.04 |

**age=30 years, timing allo >6 months, cmv=D-/R-, donor=MRD, graft=PBSC, TBI=TBI, In vivo Tcell depletion=no,**

| Landmark time (y) | GRFS | se   | GF   | se   | AGVHD | se   | CGVHD | se   | Death | se   |
|-------------------|------|------|------|------|-------|------|-------|------|-------|------|
| 0                 | 0.81 | 0.11 | 0.01 | 0.01 | 0.01  | 0.02 | 0.08  | 0.09 | 0.1   | 0.06 |
| 1                 | 0.82 | 0.11 | 0.01 | 0.01 | 0.01  | 0.02 | 0.08  | 0.09 | 0.08  | 0.06 |
| 2                 | 0.83 | 0.11 | 0    | 0.01 | 0     | 0.01 | 0.09  | 0.1  | 0.08  | 0.06 |
| 3                 | 0.84 | 0.12 | 0    | 0.01 | 0     | 0    | 0.08  | 0.1  | 0.07  | 0.06 |
| 4                 | 0.88 | 0.11 | 0    | 0.01 | 0     | 0    | 0.07  | 0.1  | 0.05  | 0.06 |
| 5                 | 0.89 | 0.11 | 0    | 0.01 | 0     | 0    | 0.07  | 0.1  | 0.04  | 0.05 |
| 6                 | 0.91 | 0.11 | 0    | 0.01 | 0     | 0    | 0.05  | 0.1  | 0.04  | 0.05 |
| 7                 | 0.93 | 0.1  | 0    | 0.01 | 0     | 0    | 0.03  | 0.08 | 0.03  | 0.05 |
| 8                 | 0.94 | 0.1  | 0    | 0.01 | 0     | 0    | 0.03  | 0.08 | 0.03  | 0.05 |
| 9                 | 0.93 | 0.1  | 0    | 0.01 | 0     | 0    | 0.03  | 0.08 | 0.03  | 0.05 |
| 10                | 0.95 | 0.09 | 0    | 0.01 | 0     | 0    | 0.02  | 0.08 | 0.03  | 0.05 |
| 11                | 0.95 | 0.09 | 0    | 0.01 | 0     | 0    | 0.03  | 0.08 | 0.02  | 0.05 |
| 12                | 0.95 | 0.09 | 0    | 0.01 | 0     | 0    | 0.03  | 0.08 | 0.03  | 0.05 |

**age=40 years, timing allo >6 months, cmv=D-/R-, donor=MRD, graft=PBSC, TBI=TBI, In vivo Tcell depletion=no,**

| Landmark time (y) | GRFS | se   | GF   | se   | AGVHD | se   | CGVHD | se   | Death | se   |
|-------------------|------|------|------|------|-------|------|-------|------|-------|------|
| 0                 | 0.74 | 0.14 | 0.01 | 0.01 | 0.02  | 0.02 | 0.11  | 0.12 | 0.13  | 0.08 |
| 1                 | 0.75 | 0.14 | 0.01 | 0.01 | 0.02  | 0.02 | 0.11  | 0.12 | 0.12  | 0.08 |
| 2                 | 0.76 | 0.15 | 0    | 0.01 | 0     | 0.01 | 0.12  | 0.13 | 0.11  | 0.08 |
| 3                 | 0.78 | 0.15 | 0    | 0.01 | 0     | 0    | 0.12  | 0.14 | 0.1   | 0.08 |
| 4                 | 0.82 | 0.15 | 0    | 0.01 | 0     | 0    | 0.1   | 0.14 | 0.07  | 0.08 |

|    |      |      |   |      |   |   |      |      |      |      |
|----|------|------|---|------|---|---|------|------|------|------|
| 5  | 0.84 | 0.15 | 0 | 0.01 | 0 | 0 | 0.1  | 0.14 | 0.06 | 0.07 |
| 6  | 0.87 | 0.15 | 0 | 0.01 | 0 | 0 | 0.08 | 0.14 | 0.05 | 0.07 |
| 7  | 0.9  | 0.13 | 0 | 0.01 | 0 | 0 | 0.05 | 0.12 | 0.05 | 0.07 |
| 8  | 0.91 | 0.13 | 0 | 0.01 | 0 | 0 | 0.05 | 0.12 | 0.04 | 0.07 |
| 9  | 0.91 | 0.13 | 0 | 0.01 | 0 | 0 | 0.05 | 0.12 | 0.04 | 0.07 |
| 10 | 0.92 | 0.12 | 0 | 0.01 | 0 | 0 | 0.04 | 0.11 | 0.04 | 0.07 |
| 11 | 0.93 | 0.12 | 0 | 0.01 | 0 | 0 | 0.04 | 0.11 | 0.04 | 0.06 |
| 12 | 0.93 | 0.12 | 0 | 0.01 | 0 | 0 | 0.04 | 0.11 | 0.04 | 0.07 |

**age=50 years, timing allo >6 months, cmv=D-/R-, donor=MRD, graft=PBSC, TBI=TBI, In vivo Tcell depletion=no,**

| Landmark time (y) | GRFS | se   | GF   | se   | AGVHD | se   | CGVHD | se   | Death | se   |
|-------------------|------|------|------|------|-------|------|-------|------|-------|------|
| 0                 | 0.64 | 0.17 | 0.01 | 0.01 | 0.03  | 0.03 | 0.14  | 0.15 | 0.18  | 0.1  |
| 1                 | 0.66 | 0.18 | 0.01 | 0.01 | 0.02  | 0.03 | 0.15  | 0.16 | 0.16  | 0.11 |
| 2                 | 0.67 | 0.19 | 0    | 0.01 | 0     | 0.02 | 0.17  | 0.17 | 0.15  | 0.11 |
| 3                 | 0.7  | 0.2  | 0    | 0.01 | 0     | 0    | 0.16  | 0.18 | 0.13  | 0.11 |
| 4                 | 0.75 | 0.2  | 0    | 0.01 | 0     | 0    | 0.14  | 0.19 | 0.1   | 0.11 |
| 5                 | 0.77 | 0.21 | 0    | 0.01 | 0     | 0    | 0.15  | 0.19 | 0.08  | 0.1  |
| 6                 | 0.82 | 0.2  | 0    | 0.01 | 0     | 0    | 0.11  | 0.19 | 0.07  | 0.1  |
| 7                 | 0.86 | 0.18 | 0    | 0.01 | 0     | 0    | 0.07  | 0.16 | 0.07  | 0.1  |
| 8                 | 0.87 | 0.18 | 0    | 0.01 | 0     | 0    | 0.07  | 0.17 | 0.06  | 0.09 |
| 9                 | 0.87 | 0.19 | 0    | 0.01 | 0     | 0    | 0.07  | 0.17 | 0.06  | 0.1  |
| 10                | 0.89 | 0.17 | 0    | 0.01 | 0     | 0    | 0.05  | 0.15 | 0.06  | 0.09 |
| 11                | 0.89 | 0.17 | 0    | 0.01 | 0     | 0    | 0.05  | 0.15 | 0.05  | 0.09 |
| 12                | 0.89 | 0.17 | 0    | 0.01 | 0     | 0    | 0.05  | 0.15 | 0.05  | 0.09 |

**age=10 years, timing allo <6 months, cmv=D-/R-, donor=MRD, graft=PBSC, TBI=TBI, In vivo Tcell depletion=no,**

| Landmark time (y) | GRFS | se   | GF | se   | AGVHD | se   | CGVHD | se   | Death | se   |
|-------------------|------|------|----|------|-------|------|-------|------|-------|------|
| 0                 | 0.86 | 0.11 | 0  | 0.01 | 0.01  | 0.02 | 0.08  | 0.11 | 0.04  | 0.03 |
| 1                 | 0.87 | 0.11 | 0  | 0.01 | 0.01  | 0.02 | 0.08  | 0.11 | 0.04  | 0.03 |
| 2                 | 0.87 | 0.12 | 0  | 0    | 0     | 0.01 | 0.09  | 0.12 | 0.03  | 0.03 |
| 3                 | 0.88 | 0.13 | 0  | 0.01 | 0     | 0    | 0.09  | 0.12 | 0.03  | 0.03 |
| 4                 | 0.9  | 0.12 | 0  | 0    | 0     | 0    | 0.08  | 0.12 | 0.02  | 0.03 |
| 5                 | 0.9  | 0.13 | 0  | 0    | 0     | 0    | 0.08  | 0.12 | 0.02  | 0.03 |
| 6                 | 0.93 | 0.12 | 0  | 0    | 0     | 0    | 0.06  | 0.12 | 0.01  | 0.02 |
| 7                 | 0.95 | 0.1  | 0  | 0    | 0     | 0    | 0.03  | 0.1  | 0.01  | 0.02 |
| 8                 | 0.95 | 0.1  | 0  | 0    | 0     | 0    | 0.03  | 0.1  | 0.01  | 0.02 |
| 9                 | 0.95 | 0.1  | 0  | 0    | 0     | 0    | 0.03  | 0.1  | 0.01  | 0.02 |
| 10                | 0.96 | 0.09 | 0  | 0    | 0     | 0    | 0.03  | 0.09 | 0.01  | 0.02 |
| 11                | 0.96 | 0.09 | 0  | 0    | 0     | 0    | 0.03  | 0.09 | 0.01  | 0.02 |
| 12                | 0.96 | 0.09 | 0  | 0    | 0     | 0    | 0.03  | 0.09 | 0.01  | 0.02 |

**age=20 years, timing allo <6 months, cmv=D-/R-, donor=MRD, graft=PBSC, TBI=TBI, In vivo Tcell depletion=no,**

| Landmark time (y) | GRFS | se   | GF | se   | AGVHD | se   | CGVHD | se   | Death | se   |
|-------------------|------|------|----|------|-------|------|-------|------|-------|------|
| 0                 | 0.8  | 0.15 | 0  | 0.01 | 0.02  | 0.02 | 0.12  | 0.15 | 0.06  | 0.04 |

|    |      |      |   |      |      |      |      |      |      |      |
|----|------|------|---|------|------|------|------|------|------|------|
| 1  | 0.81 | 0.15 | 0 | 0.01 | 0.02 | 0.02 | 0.12 | 0.15 | 0.05 | 0.04 |
| 2  | 0.81 | 0.17 | 0 | 0.01 | 0    | 0.01 | 0.13 | 0.16 | 0.05 | 0.04 |
| 3  | 0.83 | 0.17 | 0 | 0.01 | 0    | 0    | 0.13 | 0.17 | 0.04 | 0.04 |
| 4  | 0.86 | 0.17 | 0 | 0    | 0    | 0    | 0.11 | 0.17 | 0.03 | 0.04 |
| 5  | 0.86 | 0.17 | 0 | 0    | 0    | 0    | 0.11 | 0.17 | 0.02 | 0.03 |
| 6  | 0.9  | 0.16 | 0 | 0    | 0    | 0    | 0.08 | 0.16 | 0.02 | 0.03 |
| 7  | 0.93 | 0.14 | 0 | 0    | 0    | 0    | 0.05 | 0.14 | 0.02 | 0.03 |
| 8  | 0.93 | 0.14 | 0 | 0    | 0    | 0    | 0.05 | 0.14 | 0.02 | 0.03 |
| 9  | 0.93 | 0.14 | 0 | 0    | 0    | 0    | 0.05 | 0.14 | 0.02 | 0.03 |
| 10 | 0.94 | 0.13 | 0 | 0    | 0    | 0    | 0.04 | 0.13 | 0.02 | 0.03 |
| 11 | 0.94 | 0.13 | 0 | 0    | 0    | 0    | 0.04 | 0.13 | 0.01 | 0.03 |
| 12 | 0.94 | 0.13 | 0 | 0    | 0    | 0    | 0.04 | 0.13 | 0.02 | 0.03 |

**age=30 years, timing allo <6 months, cmv=D-/R-, donor=MRD, graft=PBSC, TBI=TBI, In vivo Tcell depletion=no,**

| Landmark time (y) | GRFS | se   | GF | se   | AGVHD | se   | CGVHD | se   | Death | se   |
|-------------------|------|------|----|------|-------|------|-------|------|-------|------|
| 0                 | 0.72 | 0.19 | 0  | 0.01 | 0.03  | 0.03 | 0.16  | 0.19 | 0.08  | 0.05 |
| 1                 | 0.74 | 0.2  | 0  | 0.01 | 0.02  | 0.03 | 0.17  | 0.19 | 0.07  | 0.05 |
| 2                 | 0.74 | 0.22 | 0  | 0.01 | 0     | 0.02 | 0.19  | 0.21 | 0.07  | 0.06 |
| 3                 | 0.76 | 0.22 | 0  | 0.01 | 0     | 0    | 0.18  | 0.22 | 0.06  | 0.06 |
| 4                 | 0.8  | 0.23 | 0  | 0.01 | 0     | 0    | 0.16  | 0.23 | 0.04  | 0.05 |
| 5                 | 0.81 | 0.23 | 0  | 0    | 0     | 0    | 0.16  | 0.23 | 0.03  | 0.05 |
| 6                 | 0.85 | 0.22 | 0  | 0    | 0     | 0    | 0.12  | 0.22 | 0.03  | 0.05 |
| 7                 | 0.9  | 0.2  | 0  | 0    | 0     | 0    | 0.07  | 0.19 | 0.03  | 0.05 |
| 8                 | 0.9  | 0.2  | 0  | 0    | 0     | 0    | 0.07  | 0.19 | 0.03  | 0.04 |
| 9                 | 0.9  | 0.2  | 0  | 0.01 | 0     | 0    | 0.07  | 0.2  | 0.03  | 0.05 |
| 10                | 0.92 | 0.18 | 0  | 0    | 0     | 0    | 0.06  | 0.18 | 0.02  | 0.04 |
| 11                | 0.92 | 0.18 | 0  | 0    | 0     | 0    | 0.06  | 0.18 | 0.02  | 0.04 |
| 12                | 0.92 | 0.18 | 0  | 0    | 0     | 0    | 0.06  | 0.18 | 0.02  | 0.04 |

**age=40 years, timing allo <6 months, cmv=D-/R-, donor=MRD, graft=PBSC, TBI=TBI, In vivo Tcell depletion=no,**

| Landmark time (y) | GRFS | se   | GF | se   | AGVHD | se   | CGVHD | se   | Death | se   |
|-------------------|------|------|----|------|-------|------|-------|------|-------|------|
| 0                 | 0.62 | 0.25 | 0  | 0.01 | 0.04  | 0.05 | 0.22  | 0.25 | 0.11  | 0.07 |
| 1                 | 0.64 | 0.25 | 0  | 0.01 | 0.03  | 0.05 | 0.23  | 0.25 | 0.1   | 0.07 |
| 2                 | 0.64 | 0.28 | 0  | 0.01 | 0.01  | 0.02 | 0.26  | 0.28 | 0.09  | 0.07 |
| 3                 | 0.67 | 0.28 | 0  | 0.01 | 0     | 0    | 0.25  | 0.29 | 0.08  | 0.07 |
| 4                 | 0.72 | 0.3  | 0  | 0.01 | 0     | 0    | 0.22  | 0.3  | 0.06  | 0.07 |
| 5                 | 0.73 | 0.3  | 0  | 0    | 0     | 0    | 0.22  | 0.31 | 0.04  | 0.06 |
| 6                 | 0.79 | 0.3  | 0  | 0    | 0     | 0    | 0.17  | 0.3  | 0.04  | 0.06 |
| 7                 | 0.85 | 0.27 | 0  | 0.01 | 0     | 0    | 0.1   | 0.27 | 0.04  | 0.06 |
| 8                 | 0.86 | 0.28 | 0  | 0.01 | 0     | 0    | 0.1   | 0.27 | 0.04  | 0.06 |
| 9                 | 0.86 | 0.28 | 0  | 0.01 | 0     | 0    | 0.11  | 0.27 | 0.04  | 0.06 |
| 10                | 0.88 | 0.26 | 0  | 0.01 | 0     | 0    | 0.08  | 0.25 | 0.03  | 0.06 |
| 11                | 0.89 | 0.26 | 0  | 0.01 | 0     | 0    | 0.08  | 0.25 | 0.03  | 0.06 |
| 12                | 0.89 | 0.26 | 0  | 0    | 0     | 0    | 0.08  | 0.26 | 0.03  | 0.06 |

**age=50 years, timing allo <6 months, cmv=D-/R-, donor=MRD, graft=PBSC, TBI=TBI, In vivo Tcell depletion=no,**

| Landmark time (y) | GRFS | se   | GF   | se   | AGVHD | se   | CGVHD | se   | Death | se   |
|-------------------|------|------|------|------|-------|------|-------|------|-------|------|
| 0                 | 0.5  | 0.29 | 0.01 | 0.01 | 0.05  | 0.06 | 0.29  | 0.3  | 0.15  | 0.09 |
| 1                 | 0.52 | 0.31 | 0    | 0.01 | 0.04  | 0.06 | 0.3   | 0.31 | 0.13  | 0.09 |
| 2                 | 0.52 | 0.33 | 0    | 0.01 | 0.01  | 0.03 | 0.34  | 0.34 | 0.12  | 0.1  |
| 3                 | 0.55 | 0.35 | 0    | 0.01 | 0     | 0    | 0.34  | 0.36 | 0.11  | 0.1  |
| 4                 | 0.61 | 0.38 | 0    | 0.01 | 0     | 0    | 0.3   | 0.39 | 0.08  | 0.09 |
| 5                 | 0.63 | 0.39 | 0    | 0.01 | 0     | 0    | 0.31  | 0.4  | 0.06  | 0.08 |
| 6                 | 0.71 | 0.4  | 0    | 0.01 | 0     | 0    | 0.24  | 0.41 | 0.06  | 0.09 |
| 7                 | 0.79 | 0.38 | 0    | 0.01 | 0     | 0    | 0.15  | 0.38 | 0.06  | 0.09 |
| 8                 | 0.8  | 0.38 | 0    | 0.01 | 0     | 0    | 0.15  | 0.38 | 0.05  | 0.09 |
| 9                 | 0.8  | 0.38 | 0    | 0.01 | 0     | 0    | 0.15  | 0.39 | 0.05  | 0.09 |
| 10                | 0.83 | 0.36 | 0    | 0.01 | 0     | 0    | 0.12  | 0.36 | 0.05  | 0.09 |
| 11                | 0.84 | 0.36 | 0    | 0.01 | 0     | 0    | 0.12  | 0.36 | 0.04  | 0.08 |
| 12                | 0.84 | 0.36 | 0    | 0.01 | 0     | 0    | 0.12  | 0.37 | 0.04  | 0.08 |

**age=10 years, timing allo >6 months, cmv=others, donor=MRD, graft=PBSC, TBI=TBI, In vivo Tcell depletion=no,**

| Landmark time (y) | GRFS | se   | GF   | se   | AGVHD | se   | CGVHD | se   | Death | se   |
|-------------------|------|------|------|------|-------|------|-------|------|-------|------|
| 0                 | 0.9  | 0.06 | 0.02 | 0.02 | 0.01  | 0.02 | 0.03  | 0.04 | 0.04  | 0.03 |
| 1                 | 0.91 | 0.06 | 0.02 | 0.02 | 0.01  | 0.02 | 0.03  | 0.04 | 0.03  | 0.03 |
| 2                 | 0.92 | 0.06 | 0.01 | 0.02 | 0     | 0.01 | 0.03  | 0.04 | 0.03  | 0.03 |
| 3                 | 0.93 | 0.06 | 0.01 | 0.02 | 0     | 0    | 0.03  | 0.04 | 0.03  | 0.03 |
| 4                 | 0.94 | 0.05 | 0.01 | 0.02 | 0     | 0    | 0.03  | 0.04 | 0.02  | 0.03 |
| 5                 | 0.95 | 0.05 | 0.01 | 0.02 | 0     | 0    | 0.03  | 0.04 | 0.02  | 0.03 |
| 6                 | 0.96 | 0.05 | 0.01 | 0.02 | 0     | 0    | 0.02  | 0.04 | 0.01  | 0.02 |
| 7                 | 0.97 | 0.05 | 0.01 | 0.02 | 0     | 0    | 0.01  | 0.03 | 0.01  | 0.02 |
| 8                 | 0.97 | 0.04 | 0.01 | 0.02 | 0     | 0    | 0.01  | 0.03 | 0.01  | 0.02 |
| 9                 | 0.97 | 0.05 | 0.01 | 0.02 | 0     | 0    | 0.01  | 0.03 | 0.01  | 0.02 |
| 10                | 0.97 | 0.04 | 0.01 | 0.02 | 0     | 0    | 0.01  | 0.03 | 0.01  | 0.02 |
| 11                | 0.97 | 0.04 | 0.01 | 0.02 | 0     | 0    | 0.01  | 0.03 | 0.01  | 0.02 |
| 12                | 0.98 | 0.04 | 0    | 0.02 | 0     | 0    | 0.01  | 0.03 | 0.01  | 0.02 |

**age=20 years, timing allo >6 months, cmv=others, donor=MRD, graft=PBSC, TBI=TBI, In vivo Tcell depletion=no,**

| Landmark time (y) | GRFS | se   | GF   | se   | AGVHD | se   | CGVHD | se   | Death | se   |
|-------------------|------|------|------|------|-------|------|-------|------|-------|------|
| 0                 | 0.86 | 0.07 | 0.02 | 0.02 | 0.02  | 0.03 | 0.04  | 0.05 | 0.06  | 0.04 |
| 1                 | 0.87 | 0.07 | 0.02 | 0.02 | 0.02  | 0.02 | 0.04  | 0.05 | 0.05  | 0.04 |
| 2                 | 0.89 | 0.07 | 0.02 | 0.02 | 0     | 0.01 | 0.05  | 0.06 | 0.05  | 0.04 |
| 3                 | 0.9  | 0.07 | 0.02 | 0.02 | 0     | 0    | 0.05  | 0.06 | 0.04  | 0.04 |
| 4                 | 0.92 | 0.07 | 0.01 | 0.02 | 0     | 0    | 0.04  | 0.06 | 0.03  | 0.04 |
| 5                 | 0.93 | 0.07 | 0.01 | 0.02 | 0     | 0    | 0.04  | 0.06 | 0.02  | 0.03 |
| 6                 | 0.94 | 0.07 | 0.01 | 0.02 | 0     | 0    | 0.03  | 0.06 | 0.02  | 0.03 |
| 7                 | 0.96 | 0.06 | 0.01 | 0.02 | 0     | 0    | 0.02  | 0.05 | 0.02  | 0.03 |
| 8                 | 0.96 | 0.06 | 0.01 | 0.02 | 0     | 0    | 0.02  | 0.05 | 0.02  | 0.03 |



|    |      |      |      |      |   |   |      |      |      |      |
|----|------|------|------|------|---|---|------|------|------|------|
| 9  | 0.96 | 0.06 | 0.01 | 0.02 | 0 | 0 | 0.02 | 0.05 | 0.02 | 0.03 |
| 10 | 0.96 | 0.05 | 0.01 | 0.02 | 0 | 0 | 0.01 | 0.04 | 0.02 | 0.03 |
| 11 | 0.97 | 0.05 | 0.01 | 0.02 | 0 | 0 | 0.01 | 0.04 | 0.01 | 0.03 |
| 12 | 0.97 | 0.05 | 0.01 | 0.02 | 0 | 0 | 0.01 | 0.04 | 0.01 | 0.03 |

**age=30 years, timing allo >6 months, cmv=others, donor=MRD, graft=PBSC, TBI=TBI, In vivo Tcell depletion=no,**

| Landmark time (y) | GRFS | se   | GF   | se   | AGVHD | se   | CGVHD | se   | Death | se   |
|-------------------|------|------|------|------|-------|------|-------|------|-------|------|
| 0                 | 0.81 | 0.09 | 0.02 | 0.02 | 0.03  | 0.03 | 0.06  | 0.07 | 0.08  | 0.05 |
| 1                 | 0.83 | 0.09 | 0.02 | 0.02 | 0.02  | 0.03 | 0.06  | 0.07 | 0.07  | 0.05 |
| 2                 | 0.84 | 0.09 | 0.02 | 0.02 | 0     | 0.02 | 0.07  | 0.08 | 0.07  | 0.05 |
| 3                 | 0.86 | 0.09 | 0.02 | 0.02 | 0     | 0    | 0.07  | 0.08 | 0.06  | 0.05 |
| 4                 | 0.89 | 0.09 | 0.01 | 0.02 | 0     | 0    | 0.06  | 0.08 | 0.04  | 0.05 |
| 5                 | 0.9  | 0.09 | 0.01 | 0.02 | 0     | 0    | 0.06  | 0.08 | 0.03  | 0.04 |
| 6                 | 0.92 | 0.09 | 0.01 | 0.02 | 0     | 0    | 0.04  | 0.07 | 0.03  | 0.04 |
| 7                 | 0.94 | 0.08 | 0.01 | 0.02 | 0     | 0    | 0.03  | 0.06 | 0.03  | 0.04 |
| 8                 | 0.94 | 0.08 | 0.01 | 0.02 | 0     | 0    | 0.03  | 0.06 | 0.03  | 0.04 |
| 9                 | 0.94 | 0.08 | 0.01 | 0.02 | 0     | 0    | 0.03  | 0.06 | 0.03  | 0.04 |
| 10                | 0.95 | 0.07 | 0.01 | 0.02 | 0     | 0    | 0.02  | 0.06 | 0.02  | 0.04 |
| 11                | 0.95 | 0.07 | 0.01 | 0.02 | 0     | 0    | 0.02  | 0.06 | 0.02  | 0.04 |
| 12                | 0.95 | 0.07 | 0.01 | 0.02 | 0     | 0    | 0.02  | 0.06 | 0.02  | 0.04 |

**age=40 years, timing allo >6 months, cmv=others, donor=MRD, graft=PBSC, TBI=TBI, In vivo Tcell depletion=no,**

| Landmark time (y) | GRFS | se   | GF   | se   | AGVHD | se   | CGVHD | se   | Death | se   |
|-------------------|------|------|------|------|-------|------|-------|------|-------|------|
| 0                 | 0.74 | 0.11 | 0.02 | 0.02 | 0.04  | 0.04 | 0.08  | 0.09 | 0.11  | 0.07 |
| 1                 | 0.76 | 0.11 | 0.02 | 0.02 | 0.03  | 0.04 | 0.09  | 0.09 | 0.1   | 0.07 |
| 2                 | 0.78 | 0.12 | 0.02 | 0.02 | 0.01  | 0.02 | 0.1   | 0.1  | 0.09  | 0.07 |
| 3                 | 0.8  | 0.12 | 0.02 | 0.03 | 0     | 0    | 0.09  | 0.1  | 0.08  | 0.07 |
| 4                 | 0.84 | 0.12 | 0.01 | 0.02 | 0     | 0    | 0.08  | 0.11 | 0.06  | 0.06 |
| 5                 | 0.86 | 0.12 | 0.01 | 0.02 | 0     | 0    | 0.08  | 0.11 | 0.05  | 0.06 |
| 6                 | 0.89 | 0.12 | 0.01 | 0.02 | 0     | 0    | 0.06  | 0.1  | 0.04  | 0.06 |
| 7                 | 0.91 | 0.1  | 0.01 | 0.02 | 0     | 0    | 0.04  | 0.09 | 0.04  | 0.06 |
| 8                 | 0.92 | 0.1  | 0.01 | 0.02 | 0     | 0    | 0.04  | 0.09 | 0.04  | 0.05 |
| 9                 | 0.92 | 0.1  | 0.01 | 0.02 | 0     | 0    | 0.04  | 0.09 | 0.04  | 0.06 |
| 10                | 0.93 | 0.1  | 0.01 | 0.02 | 0     | 0    | 0.03  | 0.08 | 0.03  | 0.05 |
| 11                | 0.93 | 0.1  | 0.01 | 0.02 | 0     | 0    | 0.03  | 0.08 | 0.03  | 0.05 |
| 12                | 0.93 | 0.1  | 0.01 | 0.02 | 0     | 0    | 0.03  | 0.08 | 0.03  | 0.05 |

**age=50 years, timing allo >6 months, cmv=others, donor=MRD, graft=PBSC, TBI=TBI, In vivo Tcell depletion=no,**

| Landmark time (y) | GRFS | se   | GF   | se   | AGVHD | se   | CGVHD | se   | Death | se   |
|-------------------|------|------|------|------|-------|------|-------|------|-------|------|
| 0                 | 0.65 | 0.14 | 0.03 | 0.02 | 0.05  | 0.06 | 0.11  | 0.11 | 0.15  | 0.08 |
| 1                 | 0.68 | 0.14 | 0.03 | 0.03 | 0.04  | 0.06 | 0.12  | 0.12 | 0.13  | 0.08 |
| 2                 | 0.7  | 0.15 | 0.02 | 0.03 | 0.01  | 0.03 | 0.14  | 0.13 | 0.13  | 0.09 |
| 3                 | 0.73 | 0.16 | 0.02 | 0.03 | 0     | 0    | 0.13  | 0.14 | 0.11  | 0.09 |
| 4                 | 0.78 | 0.16 | 0.01 | 0.02 | 0     | 0    | 0.12  | 0.14 | 0.08  | 0.09 |

|    |      |      |      |      |   |   |      |      |      |      |
|----|------|------|------|------|---|---|------|------|------|------|
| 5  | 0.8  | 0.16 | 0.01 | 0.02 | 0 | 0 | 0.12 | 0.15 | 0.07 | 0.08 |
| 6  | 0.84 | 0.16 | 0.01 | 0.02 | 0 | 0 | 0.09 | 0.14 | 0.06 | 0.08 |
| 7  | 0.88 | 0.14 | 0.01 | 0.02 | 0 | 0 | 0.05 | 0.12 | 0.06 | 0.08 |
| 8  | 0.88 | 0.14 | 0.01 | 0.02 | 0 | 0 | 0.05 | 0.12 | 0.05 | 0.07 |
| 9  | 0.88 | 0.14 | 0.01 | 0.02 | 0 | 0 | 0.05 | 0.12 | 0.05 | 0.08 |
| 10 | 0.9  | 0.13 | 0.01 | 0.02 | 0 | 0 | 0.04 | 0.11 | 0.05 | 0.07 |
| 11 | 0.91 | 0.13 | 0.01 | 0.02 | 0 | 0 | 0.04 | 0.11 | 0.04 | 0.07 |
| 12 | 0.91 | 0.13 | 0.01 | 0.02 | 0 | 0 | 0.04 | 0.11 | 0.04 | 0.07 |

**age=10 years, timing allo <6 months, cmv=others, donor=MRD, graft=PBSC, TBI=TBI, In vivo Tcell depletion=no,**

| Landmark time (y) | GRFS | se   | GF   | se   | AGVHD | se   | CGVHD | se   | Death | se   |
|-------------------|------|------|------|------|-------|------|-------|------|-------|------|
| 0                 | 0.86 | 0.09 | 0.02 | 0.02 | 0.03  | 0.03 | 0.07  | 0.08 | 0.03  | 0.03 |
| 1                 | 0.87 | 0.09 | 0.02 | 0.02 | 0.02  | 0.03 | 0.07  | 0.08 | 0.03  | 0.03 |
| 2                 | 0.88 | 0.1  | 0.01 | 0.02 | 0     | 0.02 | 0.07  | 0.09 | 0.03  | 0.03 |
| 3                 | 0.89 | 0.1  | 0.01 | 0.02 | 0     | 0    | 0.07  | 0.1  | 0.02  | 0.03 |
| 4                 | 0.91 | 0.1  | 0.01 | 0.02 | 0     | 0    | 0.06  | 0.1  | 0.02  | 0.02 |
| 5                 | 0.92 | 0.1  | 0.01 | 0.02 | 0     | 0    | 0.06  | 0.1  | 0.01  | 0.02 |
| 6                 | 0.94 | 0.09 | 0.01 | 0.01 | 0     | 0    | 0.04  | 0.09 | 0.01  | 0.02 |
| 7                 | 0.96 | 0.08 | 0.01 | 0.02 | 0     | 0    | 0.03  | 0.08 | 0.01  | 0.02 |
| 8                 | 0.96 | 0.08 | 0.01 | 0.02 | 0     | 0    | 0.03  | 0.08 | 0.01  | 0.02 |
| 9                 | 0.96 | 0.08 | 0.01 | 0.02 | 0     | 0    | 0.03  | 0.08 | 0.01  | 0.02 |
| 10                | 0.96 | 0.07 | 0.01 | 0.01 | 0     | 0    | 0.02  | 0.07 | 0.01  | 0.02 |
| 11                | 0.96 | 0.07 | 0.01 | 0.01 | 0     | 0    | 0.02  | 0.07 | 0.01  | 0.02 |
| 12                | 0.97 | 0.07 | 0    | 0.01 | 0     | 0    | 0.02  | 0.07 | 0.01  | 0.02 |

**age=20 years, timing allo <6 months, cmv=others, donor=MRD, graft=PBSC, TBI=TBI, In vivo Tcell depletion=no,**

| Landmark time (y) | GRFS | se   | GF   | se   | AGVHD | se   | CGVHD | se   | Death | se   |
|-------------------|------|------|------|------|-------|------|-------|------|-------|------|
| 0                 | 0.8  | 0.12 | 0.02 | 0.02 | 0.04  | 0.04 | 0.09  | 0.11 | 0.05  | 0.03 |
| 1                 | 0.82 | 0.12 | 0.02 | 0.02 | 0.03  | 0.04 | 0.09  | 0.11 | 0.04  | 0.03 |
| 2                 | 0.83 | 0.13 | 0.01 | 0.02 | 0.01  | 0.02 | 0.11  | 0.12 | 0.04  | 0.03 |
| 3                 | 0.85 | 0.13 | 0.01 | 0.02 | 0     | 0    | 0.1   | 0.13 | 0.03  | 0.03 |
| 4                 | 0.88 | 0.13 | 0.01 | 0.02 | 0     | 0    | 0.09  | 0.13 | 0.03  | 0.03 |
| 5                 | 0.88 | 0.13 | 0.01 | 0.02 | 0     | 0    | 0.09  | 0.13 | 0.02  | 0.03 |
| 6                 | 0.91 | 0.12 | 0.01 | 0.02 | 0     | 0    | 0.07  | 0.12 | 0.02  | 0.03 |
| 7                 | 0.94 | 0.11 | 0.01 | 0.02 | 0     | 0    | 0.04  | 0.1  | 0.02  | 0.03 |
| 8                 | 0.94 | 0.11 | 0.01 | 0.02 | 0     | 0    | 0.04  | 0.1  | 0.01  | 0.03 |
| 9                 | 0.94 | 0.11 | 0.01 | 0.02 | 0     | 0    | 0.04  | 0.11 | 0.02  | 0.03 |
| 10                | 0.95 | 0.1  | 0.01 | 0.02 | 0     | 0    | 0.03  | 0.1  | 0.01  | 0.03 |
| 11                | 0.95 | 0.1  | 0.01 | 0.02 | 0     | 0    | 0.03  | 0.1  | 0.01  | 0.02 |
| 12                | 0.95 | 0.1  | 0.01 | 0.01 | 0     | 0    | 0.03  | 0.1  | 0.01  | 0.03 |

**age=30 years, timing allo <6 months, cmv=others, donor=MRD, graft=PBSC, TBI=TBI, In vivo Tcell depletion=no,**

| Landmark time (y) | GRFS | se   | GF   | se   | AGVHD | se   | CGVHD | se   | Death | se   |
|-------------------|------|------|------|------|-------|------|-------|------|-------|------|
| 0                 | 0.73 | 0.15 | 0.02 | 0.02 | 0.05  | 0.06 | 0.13  | 0.14 | 0.07  | 0.04 |

|    |      |      |      |      |      |      |      |      |      |      |
|----|------|------|------|------|------|------|------|------|------|------|
| 1  | 0.75 | 0.15 | 0.02 | 0.02 | 0.04 | 0.06 | 0.13 | 0.15 | 0.06 | 0.04 |
| 2  | 0.77 | 0.17 | 0.02 | 0.02 | 0.01 | 0.03 | 0.15 | 0.16 | 0.06 | 0.05 |
| 3  | 0.79 | 0.17 | 0.02 | 0.02 | 0    | 0    | 0.14 | 0.17 | 0.05 | 0.05 |
| 4  | 0.83 | 0.17 | 0.01 | 0.02 | 0    | 0    | 0.13 | 0.17 | 0.04 | 0.04 |
| 5  | 0.84 | 0.17 | 0.01 | 0.02 | 0    | 0    | 0.13 | 0.17 | 0.03 | 0.04 |
| 6  | 0.87 | 0.17 | 0.01 | 0.02 | 0    | 0    | 0.09 | 0.17 | 0.02 | 0.04 |
| 7  | 0.91 | 0.15 | 0.01 | 0.02 | 0    | 0    | 0.06 | 0.14 | 0.02 | 0.04 |
| 8  | 0.91 | 0.15 | 0.01 | 0.02 | 0    | 0    | 0.06 | 0.15 | 0.02 | 0.04 |
| 9  | 0.91 | 0.15 | 0.01 | 0.02 | 0    | 0    | 0.06 | 0.15 | 0.02 | 0.04 |
| 10 | 0.93 | 0.14 | 0.01 | 0.02 | 0    | 0    | 0.05 | 0.13 | 0.02 | 0.04 |
| 11 | 0.93 | 0.14 | 0.01 | 0.02 | 0    | 0    | 0.05 | 0.13 | 0.02 | 0.03 |
| 12 | 0.93 | 0.14 | 0.01 | 0.02 | 0    | 0    | 0.05 | 0.13 | 0.02 | 0.04 |

**age=40 years, timing allo <6 months, cmv=others, donor=MRD, graft=PBSC, TBI=TBI, In vivo Tcell depletion=no,**

| Landmark time (y) | GRFS | se   | GF   | se   | AGVHD | se   | CGVHD | se   | Death | se   |
|-------------------|------|------|------|------|-------|------|-------|------|-------|------|
| 0                 | 0.64 | 0.19 | 0.02 | 0.02 | 0.07  | 0.07 | 0.18  | 0.18 | 0.09  | 0.06 |
| 1                 | 0.66 | 0.2  | 0.02 | 0.02 | 0.06  | 0.07 | 0.18  | 0.19 | 0.08  | 0.06 |
| 2                 | 0.68 | 0.22 | 0.02 | 0.02 | 0.01  | 0.04 | 0.21  | 0.21 | 0.08  | 0.06 |
| 3                 | 0.71 | 0.22 | 0.02 | 0.02 | 0     | 0    | 0.2   | 0.22 | 0.07  | 0.06 |
| 4                 | 0.76 | 0.23 | 0.01 | 0.02 | 0     | 0    | 0.18  | 0.23 | 0.05  | 0.06 |
| 5                 | 0.77 | 0.23 | 0.01 | 0.02 | 0     | 0    | 0.18  | 0.23 | 0.04  | 0.05 |
| 6                 | 0.82 | 0.23 | 0.01 | 0.02 | 0     | 0    | 0.14  | 0.23 | 0.03  | 0.05 |
| 7                 | 0.87 | 0.21 | 0.01 | 0.02 | 0     | 0    | 0.08  | 0.2  | 0.03  | 0.05 |
| 8                 | 0.88 | 0.21 | 0.01 | 0.02 | 0     | 0    | 0.08  | 0.2  | 0.03  | 0.05 |
| 9                 | 0.88 | 0.21 | 0.01 | 0.02 | 0     | 0    | 0.08  | 0.2  | 0.03  | 0.05 |
| 10                | 0.9  | 0.19 | 0.01 | 0.02 | 0     | 0    | 0.07  | 0.19 | 0.03  | 0.05 |
| 11                | 0.9  | 0.19 | 0.01 | 0.02 | 0     | 0    | 0.07  | 0.19 | 0.03  | 0.05 |
| 12                | 0.9  | 0.19 | 0.01 | 0.02 | 0     | 0    | 0.07  | 0.19 | 0.03  | 0.05 |

**age=50 years, timing allo <6 months, cmv=others, donor=MRD, graft=PBSC, TBI=TBI, In vivo Tcell depletion=no,**

| Landmark time (y) | GRFS | se   | GF   | se   | AGVHD | se   | CGVHD | se   | Death | se   |
|-------------------|------|------|------|------|-------|------|-------|------|-------|------|
| 0                 | 0.53 | 0.23 | 0.02 | 0.02 | 0.1   | 0.1  | 0.23  | 0.23 | 0.12  | 0.07 |
| 1                 | 0.55 | 0.24 | 0.02 | 0.02 | 0.08  | 0.1  | 0.24  | 0.24 | 0.11  | 0.07 |
| 2                 | 0.58 | 0.27 | 0.02 | 0.02 | 0.01  | 0.06 | 0.29  | 0.27 | 0.11  | 0.08 |
| 3                 | 0.61 | 0.28 | 0.02 | 0.02 | 0     | 0    | 0.28  | 0.29 | 0.09  | 0.08 |
| 4                 | 0.67 | 0.3  | 0.01 | 0.02 | 0     | 0    | 0.25  | 0.31 | 0.07  | 0.08 |
| 5                 | 0.68 | 0.3  | 0.01 | 0.02 | 0     | 0    | 0.26  | 0.31 | 0.05  | 0.07 |
| 6                 | 0.75 | 0.31 | 0.01 | 0.02 | 0     | 0    | 0.19  | 0.31 | 0.05  | 0.07 |
| 7                 | 0.82 | 0.29 | 0.01 | 0.02 | 0     | 0    | 0.12  | 0.28 | 0.05  | 0.07 |
| 8                 | 0.83 | 0.29 | 0.01 | 0.02 | 0     | 0    | 0.12  | 0.29 | 0.04  | 0.07 |
| 9                 | 0.82 | 0.29 | 0.01 | 0.02 | 0     | 0    | 0.12  | 0.29 | 0.04  | 0.07 |
| 10                | 0.86 | 0.27 | 0.01 | 0.02 | 0     | 0    | 0.1   | 0.27 | 0.04  | 0.07 |
| 11                | 0.86 | 0.27 | 0.01 | 0.02 | 0     | 0    | 0.1   | 0.27 | 0.04  | 0.07 |
| 12                | 0.86 | 0.27 | 0.01 | 0.02 | 0     | 0    | 0.1   | 0.27 | 0.04  | 0.07 |

**age=10 years, timing allo >6 months, cmv=D-/R-, donor=UD, graft=PBSC, TBI=TBI, In vivo Tcell depletion=no,**

| Landmark time (y) | GRFS | se   | GF | se | AGVHD | se   | CGVHD | se   | Death | se   |
|-------------------|------|------|----|----|-------|------|-------|------|-------|------|
| 0                 | 0.82 | 0.09 | 0  | 0  | 0.06  | 0.06 | 0.04  | 0.04 | 0.08  | 0.05 |
| 1                 | 0.84 | 0.09 | 0  | 0  | 0.04  | 0.06 | 0.04  | 0.05 | 0.07  | 0.06 |
| 2                 | 0.87 | 0.08 | 0  | 0  | 0.01  | 0.03 | 0.04  | 0.05 | 0.07  | 0.06 |
| 3                 | 0.89 | 0.08 | 0  | 0  | 0     | 0    | 0.04  | 0.05 | 0.06  | 0.06 |
| 4                 | 0.92 | 0.07 | 0  | 0  | 0     | 0    | 0.04  | 0.05 | 0.05  | 0.05 |
| 5                 | 0.93 | 0.07 | 0  | 0  | 0     | 0    | 0.04  | 0.05 | 0.04  | 0.05 |
| 6                 | 0.94 | 0.07 | 0  | 0  | 0     | 0    | 0.03  | 0.05 | 0.03  | 0.05 |
| 7                 | 0.95 | 0.06 | 0  | 0  | 0     | 0    | 0.02  | 0.04 | 0.03  | 0.05 |
| 8                 | 0.96 | 0.06 | 0  | 0  | 0     | 0    | 0.02  | 0.04 | 0.03  | 0.04 |
| 9                 | 0.95 | 0.06 | 0  | 0  | 0     | 0    | 0.02  | 0.04 | 0.03  | 0.05 |
| 10                | 0.96 | 0.06 | 0  | 0  | 0     | 0    | 0.01  | 0.04 | 0.03  | 0.04 |
| 11                | 0.96 | 0.06 | 0  | 0  | 0     | 0    | 0.01  | 0.04 | 0.02  | 0.04 |
| 12                | 0.96 | 0.06 | 0  | 0  | 0     | 0    | 0.01  | 0.04 | 0.02  | 0.04 |

**age=20 years, timing allo >6 months, cmv=D-/R-, donor=UD, graft=PBSC, TBI=TBI, In vivo Tcell depletion=no,**

| Landmark time (y) | GRFS | se   | GF | se   | AGVHD | se   | CGVHD | se   | Death | se   |
|-------------------|------|------|----|------|-------|------|-------|------|-------|------|
| 0                 | 0.75 | 0.11 | 0  | 0    | 0.08  | 0.08 | 0.05  | 0.06 | 0.12  | 0.07 |
| 1                 | 0.78 | 0.11 | 0  | 0    | 0.06  | 0.08 | 0.05  | 0.06 | 0.1   | 0.07 |
| 2                 | 0.82 | 0.1  | 0  | 0    | 0.01  | 0.04 | 0.06  | 0.07 | 0.1   | 0.08 |
| 3                 | 0.85 | 0.1  | 0  | 0.01 | 0     | 0    | 0.06  | 0.07 | 0.09  | 0.08 |
| 4                 | 0.88 | 0.1  | 0  | 0    | 0     | 0    | 0.05  | 0.07 | 0.07  | 0.07 |
| 5                 | 0.89 | 0.09 | 0  | 0    | 0     | 0    | 0.05  | 0.07 | 0.05  | 0.07 |
| 6                 | 0.91 | 0.09 | 0  | 0    | 0     | 0    | 0.04  | 0.07 | 0.05  | 0.06 |
| 7                 | 0.93 | 0.08 | 0  | 0    | 0     | 0    | 0.02  | 0.06 | 0.04  | 0.06 |
| 8                 | 0.94 | 0.08 | 0  | 0    | 0     | 0    | 0.02  | 0.06 | 0.04  | 0.06 |
| 9                 | 0.93 | 0.08 | 0  | 0    | 0     | 0    | 0.02  | 0.06 | 0.04  | 0.06 |
| 10                | 0.94 | 0.08 | 0  | 0    | 0     | 0    | 0.02  | 0.05 | 0.04  | 0.06 |
| 11                | 0.95 | 0.08 | 0  | 0    | 0     | 0    | 0.02  | 0.05 | 0.03  | 0.06 |
| 12                | 0.95 | 0.08 | 0  | 0    | 0     | 0    | 0.02  | 0.05 | 0.03  | 0.06 |

**age=30 years, timing allo >6 months, cmv=D-/R-, donor=UD, graft=PBSC, TBI=TBI, In vivo Tcell depletion=no,**

| Landmark time (y) | GRFS | se   | GF | se   | AGVHD | se   | CGVHD | se   | Death | se   |
|-------------------|------|------|----|------|-------|------|-------|------|-------|------|
| 0                 | 0.66 | 0.13 | 0  | 0    | 0.11  | 0.09 | 0.07  | 0.07 | 0.16  | 0.09 |
| 1                 | 0.7  | 0.13 | 0  | 0    | 0.09  | 0.09 | 0.07  | 0.07 | 0.14  | 0.09 |
| 2                 | 0.75 | 0.13 | 0  | 0.01 | 0.02  | 0.05 | 0.09  | 0.09 | 0.14  | 0.1  |
| 3                 | 0.79 | 0.13 | 0  | 0.01 | 0     | 0    | 0.08  | 0.09 | 0.13  | 0.1  |
| 4                 | 0.83 | 0.13 | 0  | 0    | 0     | 0    | 0.07  | 0.09 | 0.09  | 0.09 |
| 5                 | 0.85 | 0.12 | 0  | 0    | 0     | 0    | 0.08  | 0.1  | 0.07  | 0.09 |
| 6                 | 0.88 | 0.12 | 0  | 0    | 0     | 0    | 0.06  | 0.09 | 0.07  | 0.08 |
| 7                 | 0.9  | 0.11 | 0  | 0    | 0     | 0    | 0.03  | 0.08 | 0.06  | 0.08 |
| 8                 | 0.91 | 0.11 | 0  | 0    | 0     | 0    | 0.03  | 0.08 | 0.06  | 0.08 |

|    |      |      |   |   |   |   |      |      |      |      |
|----|------|------|---|---|---|---|------|------|------|------|
| 9  | 0.91 | 0.11 | 0 | 0 | 0 | 0 | 0.03 | 0.08 | 0.06 | 0.08 |
| 10 | 0.92 | 0.1  | 0 | 0 | 0 | 0 | 0.03 | 0.07 | 0.05 | 0.08 |
| 11 | 0.93 | 0.1  | 0 | 0 | 0 | 0 | 0.03 | 0.07 | 0.05 | 0.08 |
| 12 | 0.92 | 0.1  | 0 | 0 | 0 | 0 | 0.03 | 0.07 | 0.05 | 0.08 |

**age=40 years, timing allo >6 months, cmv=D-/R-, donor=UD, graft=PBSC, TBI=TBI, In vivo Tcell depletion=no,**

| Landmark time (y) | GRFS | se   | GF | se   | AGVHD | se   | CGVHD | se   | Death | se   |
|-------------------|------|------|----|------|-------|------|-------|------|-------|------|
| 0                 | 0.55 | 0.15 | 0  | 0    | 0.14  | 0.12 | 0.09  | 0.09 | 0.21  | 0.11 |
| 1                 | 0.59 | 0.16 | 0  | 0    | 0.12  | 0.12 | 0.1   | 0.09 | 0.19  | 0.11 |
| 2                 | 0.66 | 0.16 | 0  | 0.01 | 0.02  | 0.07 | 0.12  | 0.11 | 0.2   | 0.12 |
| 3                 | 0.7  | 0.16 | 0  | 0.01 | 0     | 0    | 0.12  | 0.12 | 0.18  | 0.13 |
| 4                 | 0.76 | 0.16 | 0  | 0.01 | 0     | 0    | 0.11  | 0.13 | 0.13  | 0.12 |
| 5                 | 0.79 | 0.16 | 0  | 0    | 0     | 0    | 0.11  | 0.13 | 0.1   | 0.11 |
| 6                 | 0.83 | 0.16 | 0  | 0    | 0     | 0    | 0.08  | 0.12 | 0.09  | 0.11 |
| 7                 | 0.86 | 0.15 | 0  | 0    | 0     | 0    | 0.05  | 0.11 | 0.09  | 0.11 |
| 8                 | 0.87 | 0.15 | 0  | 0    | 0     | 0    | 0.05  | 0.11 | 0.08  | 0.11 |
| 9                 | 0.87 | 0.15 | 0  | 0.01 | 0     | 0    | 0.05  | 0.11 | 0.08  | 0.11 |
| 10                | 0.89 | 0.14 | 0  | 0    | 0     | 0    | 0.04  | 0.1  | 0.07  | 0.11 |
| 11                | 0.89 | 0.14 | 0  | 0    | 0     | 0    | 0.04  | 0.1  | 0.07  | 0.1  |
| 12                | 0.89 | 0.14 | 0  | 0    | 0     | 0    | 0.04  | 0.1  | 0.07  | 0.11 |

**age=50 years, timing allo >6 months, cmv=D-/R-, donor=UD, graft=PBSC, TBI=TBI, In vivo Tcell depletion=no,**

| Landmark time (y) | GRFS | se   | GF | se   | AGVHD | se   | CGVHD | se   | Death | se   |
|-------------------|------|------|----|------|-------|------|-------|------|-------|------|
| 0                 | 0.42 | 0.16 | 0  | 0    | 0.19  | 0.14 | 0.11  | 0.1  | 0.27  | 0.13 |
| 1                 | 0.47 | 0.18 | 0  | 0    | 0.16  | 0.15 | 0.12  | 0.11 | 0.24  | 0.14 |
| 2                 | 0.55 | 0.19 | 0  | 0.01 | 0.03  | 0.09 | 0.16  | 0.14 | 0.26  | 0.16 |
| 3                 | 0.6  | 0.2  | 0  | 0.01 | 0     | 0    | 0.16  | 0.15 | 0.24  | 0.16 |
| 4                 | 0.67 | 0.21 | 0  | 0.01 | 0     | 0    | 0.15  | 0.17 | 0.18  | 0.16 |
| 5                 | 0.7  | 0.21 | 0  | 0    | 0     | 0    | 0.15  | 0.18 | 0.14  | 0.15 |
| 6                 | 0.76 | 0.21 | 0  | 0    | 0     | 0    | 0.11  | 0.17 | 0.13  | 0.15 |
| 7                 | 0.81 | 0.2  | 0  | 0.01 | 0     | 0    | 0.07  | 0.15 | 0.12  | 0.15 |
| 8                 | 0.82 | 0.2  | 0  | 0.01 | 0     | 0    | 0.07  | 0.15 | 0.11  | 0.15 |
| 9                 | 0.81 | 0.2  | 0  | 0.01 | 0     | 0    | 0.07  | 0.15 | 0.11  | 0.15 |
| 10                | 0.84 | 0.2  | 0  | 0.01 | 0     | 0    | 0.06  | 0.14 | 0.11  | 0.15 |
| 11                | 0.85 | 0.19 | 0  | 0.01 | 0     | 0    | 0.06  | 0.14 | 0.09  | 0.14 |
| 12                | 0.85 | 0.2  | 0  | 0    | 0     | 0    | 0.06  | 0.14 | 0.1   | 0.15 |

**age=10 years, timing allo <6 months, cmv=D-/R-, donor=UD, graft=PBSC, TBI=TBI, In vivo Tcell depletion=no,**

| Landmark time (y) | GRFS | se   | GF | se | AGVHD | se   | CGVHD | se   | Death | se   |
|-------------------|------|------|----|----|-------|------|-------|------|-------|------|
| 0                 | 0.74 | 0.14 | 0  | 0  | 0.1   | 0.11 | 0.08  | 0.09 | 0.07  | 0.05 |
| 1                 | 0.77 | 0.14 | 0  | 0  | 0.08  | 0.11 | 0.08  | 0.1  | 0.06  | 0.05 |
| 2                 | 0.82 | 0.13 | 0  | 0  | 0.02  | 0.06 | 0.1   | 0.11 | 0.06  | 0.05 |
| 3                 | 0.85 | 0.13 | 0  | 0  | 0     | 0    | 0.09  | 0.12 | 0.05  | 0.05 |
| 4                 | 0.88 | 0.13 | 0  | 0  | 0     | 0    | 0.08  | 0.12 | 0.04  | 0.05 |

|    |      |      |   |   |   |   |      |      |      |      |
|----|------|------|---|---|---|---|------|------|------|------|
| 5  | 0.89 | 0.12 | 0 | 0 | 0 | 0 | 0.08 | 0.12 | 0.03 | 0.04 |
| 6  | 0.91 | 0.12 | 0 | 0 | 0 | 0 | 0.06 | 0.11 | 0.03 | 0.04 |
| 7  | 0.94 | 0.1  | 0 | 0 | 0 | 0 | 0.04 | 0.1  | 0.03 | 0.04 |
| 8  | 0.94 | 0.1  | 0 | 0 | 0 | 0 | 0.04 | 0.1  | 0.02 | 0.04 |
| 9  | 0.94 | 0.1  | 0 | 0 | 0 | 0 | 0.04 | 0.1  | 0.02 | 0.04 |
| 10 | 0.95 | 0.1  | 0 | 0 | 0 | 0 | 0.03 | 0.09 | 0.02 | 0.04 |
| 11 | 0.95 | 0.09 | 0 | 0 | 0 | 0 | 0.03 | 0.09 | 0.02 | 0.04 |
| 12 | 0.95 | 0.1  | 0 | 0 | 0 | 0 | 0.03 | 0.09 | 0.02 | 0.04 |

**age=20 years, timing allo <6 months, cmv=D-/R-, donor=UD, graft=PBSC, TBI=TBI, In vivo Tcell depletion=no,**

| Landmark time (y) | GRFS | se   | GF | se | AGVHD | se   | CGVHD | se   | Death | se   |
|-------------------|------|------|----|----|-------|------|-------|------|-------|------|
| 0                 | 0.65 | 0.17 | 0  | 0  | 0.14  | 0.14 | 0.11  | 0.12 | 0.09  | 0.06 |
| 1                 | 0.69 | 0.17 | 0  | 0  | 0.11  | 0.14 | 0.11  | 0.12 | 0.08  | 0.06 |
| 2                 | 0.75 | 0.17 | 0  | 0  | 0.02  | 0.08 | 0.14  | 0.15 | 0.09  | 0.07 |
| 3                 | 0.79 | 0.16 | 0  | 0  | 0     | 0    | 0.13  | 0.16 | 0.08  | 0.07 |
| 4                 | 0.83 | 0.17 | 0  | 0  | 0     | 0    | 0.12  | 0.16 | 0.06  | 0.06 |
| 5                 | 0.84 | 0.17 | 0  | 0  | 0     | 0    | 0.12  | 0.16 | 0.04  | 0.06 |
| 6                 | 0.87 | 0.16 | 0  | 0  | 0     | 0    | 0.09  | 0.15 | 0.04  | 0.06 |
| 7                 | 0.91 | 0.14 | 0  | 0  | 0     | 0    | 0.05  | 0.13 | 0.04  | 0.06 |
| 8                 | 0.91 | 0.14 | 0  | 0  | 0     | 0    | 0.05  | 0.13 | 0.03  | 0.06 |
| 9                 | 0.91 | 0.14 | 0  | 0  | 0     | 0    | 0.05  | 0.13 | 0.03  | 0.06 |
| 10                | 0.93 | 0.13 | 0  | 0  | 0     | 0    | 0.04  | 0.12 | 0.03  | 0.06 |
| 11                | 0.93 | 0.13 | 0  | 0  | 0     | 0    | 0.04  | 0.12 | 0.03  | 0.05 |
| 12                | 0.93 | 0.13 | 0  | 0  | 0     | 0    | 0.04  | 0.12 | 0.03  | 0.05 |

**age=30 years, timing allo <6 months, cmv=D-/R-, donor=UD, graft=PBSC, TBI=TBI, In vivo Tcell depletion=no,**

| Landmark time (y) | GRFS | se   | GF | se | AGVHD | se   | CGVHD | se   | Death | se   |
|-------------------|------|------|----|----|-------|------|-------|------|-------|------|
| 0                 | 0.54 | 0.19 | 0  | 0  | 0.19  | 0.18 | 0.14  | 0.15 | 0.12  | 0.08 |
| 1                 | 0.58 | 0.21 | 0  | 0  | 0.16  | 0.18 | 0.15  | 0.16 | 0.11  | 0.08 |
| 2                 | 0.66 | 0.21 | 0  | 0  | 0.03  | 0.11 | 0.19  | 0.19 | 0.12  | 0.09 |
| 3                 | 0.71 | 0.21 | 0  | 0  | 0     | 0    | 0.18  | 0.2  | 0.11  | 0.09 |
| 4                 | 0.76 | 0.22 | 0  | 0  | 0     | 0    | 0.16  | 0.21 | 0.08  | 0.09 |
| 5                 | 0.77 | 0.22 | 0  | 0  | 0     | 0    | 0.17  | 0.22 | 0.06  | 0.08 |
| 6                 | 0.82 | 0.22 | 0  | 0  | 0     | 0    | 0.12  | 0.21 | 0.05  | 0.08 |
| 7                 | 0.87 | 0.2  | 0  | 0  | 0     | 0    | 0.08  | 0.18 | 0.05  | 0.08 |
| 8                 | 0.87 | 0.2  | 0  | 0  | 0     | 0    | 0.08  | 0.19 | 0.05  | 0.08 |
| 9                 | 0.87 | 0.2  | 0  | 0  | 0     | 0    | 0.08  | 0.19 | 0.05  | 0.08 |
| 10                | 0.89 | 0.18 | 0  | 0  | 0     | 0    | 0.06  | 0.17 | 0.04  | 0.08 |
| 11                | 0.9  | 0.18 | 0  | 0  | 0     | 0    | 0.06  | 0.17 | 0.04  | 0.07 |
| 12                | 0.9  | 0.18 | 0  | 0  | 0     | 0    | 0.06  | 0.17 | 0.04  | 0.08 |

**age=40 years, timing allo <6 months, cmv=D-/R-, donor=UD, graft=PBSC, TBI=TBI, In vivo Tcell depletion=no,**

| Landmark time (y) | GRFS | se   | GF | se | AGVHD | se   | CGVHD | se   | Death | se   |
|-------------------|------|------|----|----|-------|------|-------|------|-------|------|
| 0                 | 0.41 | 0.21 | 0  | 0  | 0.26  | 0.22 | 0.17  | 0.17 | 0.16  | 0.09 |

|    |      |      |   |   |      |      |      |      |      |      |
|----|------|------|---|---|------|------|------|------|------|------|
| 1  | 0.46 | 0.23 | 0 | 0 | 0.21 | 0.24 | 0.18 | 0.19 | 0.14 | 0.1  |
| 2  | 0.55 | 0.26 | 0 | 0 | 0.04 | 0.15 | 0.25 | 0.24 | 0.16 | 0.12 |
| 3  | 0.6  | 0.26 | 0 | 0 | 0    | 0    | 0.25 | 0.26 | 0.14 | 0.12 |
| 4  | 0.66 | 0.28 | 0 | 0 | 0    | 0    | 0.23 | 0.28 | 0.11 | 0.12 |
| 5  | 0.68 | 0.29 | 0 | 0 | 0    | 0    | 0.23 | 0.29 | 0.08 | 0.11 |
| 6  | 0.75 | 0.29 | 0 | 0 | 0    | 0    | 0.18 | 0.29 | 0.08 | 0.11 |
| 7  | 0.81 | 0.27 | 0 | 0 | 0    | 0    | 0.11 | 0.26 | 0.07 | 0.11 |
| 8  | 0.82 | 0.27 | 0 | 0 | 0    | 0    | 0.11 | 0.26 | 0.07 | 0.11 |
| 9  | 0.82 | 0.27 | 0 | 0 | 0    | 0    | 0.11 | 0.26 | 0.07 | 0.11 |
| 10 | 0.85 | 0.25 | 0 | 0 | 0    | 0    | 0.09 | 0.24 | 0.06 | 0.11 |
| 11 | 0.86 | 0.25 | 0 | 0 | 0    | 0    | 0.09 | 0.24 | 0.06 | 0.1  |
| 12 | 0.85 | 0.25 | 0 | 0 | 0    | 0    | 0.09 | 0.24 | 0.06 | 0.1  |

**age=50 years, timing allo <6 months, cmv=D-/R-, donor=UD, graft=PBSC, TBI=TBI, In vivo Tcell depletion=no,**

| Landmark time (y) | GRFS | se   | GF | se   | AGVHD | se   | CGVHD | se   | Death | se   |
|-------------------|------|------|----|------|-------|------|-------|------|-------|------|
| 0                 | 0.28 | 0.21 | 0  | 0    | 0.34  | 0.27 | 0.19  | 0.19 | 0.19  | 0.12 |
| 1                 | 0.32 | 0.24 | 0  | 0    | 0.29  | 0.3  | 0.22  | 0.22 | 0.17  | 0.13 |
| 2                 | 0.41 | 0.29 | 0  | 0    | 0.06  | 0.21 | 0.32  | 0.29 | 0.2   | 0.15 |
| 3                 | 0.47 | 0.31 | 0  | 0.01 | 0     | 0    | 0.33  | 0.32 | 0.19  | 0.16 |
| 4                 | 0.55 | 0.35 | 0  | 0    | 0     | 0    | 0.31  | 0.36 | 0.14  | 0.16 |
| 5                 | 0.57 | 0.36 | 0  | 0    | 0     | 0    | 0.32  | 0.37 | 0.11  | 0.14 |
| 6                 | 0.65 | 0.38 | 0  | 0    | 0     | 0    | 0.25  | 0.39 | 0.1   | 0.15 |
| 7                 | 0.74 | 0.37 | 0  | 0    | 0     | 0    | 0.15  | 0.36 | 0.1   | 0.16 |
| 8                 | 0.75 | 0.37 | 0  | 0    | 0     | 0    | 0.16  | 0.36 | 0.09  | 0.15 |
| 9                 | 0.75 | 0.37 | 0  | 0.01 | 0     | 0    | 0.16  | 0.37 | 0.09  | 0.15 |
| 10                | 0.79 | 0.35 | 0  | 0    | 0     | 0    | 0.12  | 0.34 | 0.09  | 0.15 |
| 11                | 0.79 | 0.36 | 0  | 0    | 0     | 0    | 0.13  | 0.35 | 0.08  | 0.14 |
| 12                | 0.79 | 0.36 | 0  | 0    | 0     | 0    | 0.13  | 0.35 | 0.08  | 0.15 |

**age=10 years, timing allo >6 months, cmv=others, donor=UD, graft=PBSC, TBI=TBI, In vivo Tcell depletion=no,**

| Landmark time (y) | GRFS | se   | GF   | se   | AGVHD | se   | CGVHD | se   | Death | se   |
|-------------------|------|------|------|------|-------|------|-------|------|-------|------|
| 0                 | 0.78 | 0.12 | 0.01 | 0.02 | 0.11  | 0.12 | 0.03  | 0.03 | 0.07  | 0.05 |
| 1                 | 0.81 | 0.12 | 0.01 | 0.02 | 0.08  | 0.12 | 0.03  | 0.04 | 0.06  | 0.05 |
| 2                 | 0.88 | 0.09 | 0.01 | 0.02 | 0.02  | 0.07 | 0.03  | 0.04 | 0.06  | 0.05 |
| 3                 | 0.9  | 0.07 | 0.01 | 0.02 | 0     | 0    | 0.03  | 0.04 | 0.05  | 0.05 |
| 4                 | 0.92 | 0.06 | 0.01 | 0.02 | 0     | 0    | 0.03  | 0.04 | 0.04  | 0.05 |
| 5                 | 0.93 | 0.06 | 0.01 | 0.01 | 0     | 0    | 0.03  | 0.04 | 0.03  | 0.04 |
| 6                 | 0.95 | 0.06 | 0.01 | 0.01 | 0     | 0    | 0.02  | 0.04 | 0.03  | 0.04 |
| 7                 | 0.96 | 0.05 | 0.01 | 0.01 | 0     | 0    | 0.01  | 0.03 | 0.02  | 0.04 |
| 8                 | 0.96 | 0.05 | 0.01 | 0.01 | 0     | 0    | 0.01  | 0.03 | 0.02  | 0.04 |
| 9                 | 0.96 | 0.05 | 0.01 | 0.02 | 0     | 0    | 0.01  | 0.03 | 0.02  | 0.04 |
| 10                | 0.96 | 0.05 | 0.01 | 0.01 | 0     | 0    | 0.01  | 0.03 | 0.02  | 0.04 |
| 11                | 0.97 | 0.05 | 0.01 | 0.01 | 0     | 0    | 0.01  | 0.03 | 0.02  | 0.04 |
| 12                | 0.97 | 0.05 | 0    | 0.01 | 0     | 0    | 0.01  | 0.03 | 0.02  | 0.04 |

**age=20 years, timing allo >6 months, cmv=others, donor=UD, graft=PBSC, TBI=TBI, In vivo Tcell depletion=no,**

| Landmark time (y) | GRFS | se   | GF   | se   | AGVHD | se   | CGVHD | se   | Death | se   |
|-------------------|------|------|------|------|-------|------|-------|------|-------|------|
| 0                 | 0.71 | 0.14 | 0.02 | 0.02 | 0.14  | 0.15 | 0.04  | 0.04 | 0.09  | 0.06 |
| 1                 | 0.75 | 0.15 | 0.02 | 0.02 | 0.12  | 0.15 | 0.04  | 0.04 | 0.08  | 0.06 |
| 2                 | 0.83 | 0.11 | 0.01 | 0.02 | 0.02  | 0.09 | 0.05  | 0.05 | 0.09  | 0.07 |
| 3                 | 0.86 | 0.09 | 0.01 | 0.02 | 0     | 0    | 0.05  | 0.06 | 0.08  | 0.07 |
| 4                 | 0.89 | 0.08 | 0.01 | 0.02 | 0     | 0    | 0.04  | 0.06 | 0.06  | 0.06 |
| 5                 | 0.91 | 0.08 | 0.01 | 0.02 | 0     | 0    | 0.04  | 0.06 | 0.04  | 0.06 |
| 6                 | 0.92 | 0.08 | 0.01 | 0.01 | 0     | 0    | 0.03  | 0.05 | 0.04  | 0.06 |
| 7                 | 0.94 | 0.07 | 0.01 | 0.02 | 0     | 0    | 0.02  | 0.05 | 0.04  | 0.05 |
| 8                 | 0.94 | 0.07 | 0.01 | 0.02 | 0     | 0    | 0.02  | 0.05 | 0.03  | 0.05 |
| 9                 | 0.94 | 0.07 | 0.01 | 0.02 | 0     | 0    | 0.02  | 0.05 | 0.03  | 0.05 |
| 10                | 0.95 | 0.07 | 0.01 | 0.02 | 0     | 0    | 0.01  | 0.04 | 0.03  | 0.05 |
| 11                | 0.95 | 0.07 | 0.01 | 0.02 | 0     | 0    | 0.01  | 0.04 | 0.03  | 0.05 |
| 12                | 0.95 | 0.07 | 0    | 0.01 | 0     | 0    | 0.01  | 0.04 | 0.03  | 0.05 |

**age=30 years, timing allo >6 months, cmv=others, donor=UD, graft=PBSC, TBI=TBI, In vivo Tcell depletion=no,**

| Landmark time (y) | GRFS | se   | GF   | se   | AGVHD | se   | CGVHD | se   | Death | se   |
|-------------------|------|------|------|------|-------|------|-------|------|-------|------|
| 0                 | 0.62 | 0.16 | 0.02 | 0.02 | 0.2   | 0.18 | 0.05  | 0.05 | 0.12  | 0.07 |
| 1                 | 0.66 | 0.17 | 0.02 | 0.02 | 0.16  | 0.18 | 0.05  | 0.06 | 0.11  | 0.07 |
| 2                 | 0.77 | 0.14 | 0.01 | 0.02 | 0.03  | 0.11 | 0.07  | 0.07 | 0.12  | 0.09 |
| 3                 | 0.81 | 0.11 | 0.02 | 0.02 | 0     | 0    | 0.07  | 0.07 | 0.11  | 0.09 |
| 4                 | 0.85 | 0.11 | 0.01 | 0.02 | 0     | 0    | 0.06  | 0.07 | 0.08  | 0.08 |
| 5                 | 0.87 | 0.1  | 0.01 | 0.02 | 0     | 0    | 0.06  | 0.08 | 0.06  | 0.08 |
| 6                 | 0.89 | 0.1  | 0.01 | 0.02 | 0     | 0    | 0.04  | 0.07 | 0.06  | 0.07 |
| 7                 | 0.91 | 0.09 | 0.01 | 0.02 | 0     | 0    | 0.03  | 0.06 | 0.05  | 0.07 |
| 8                 | 0.92 | 0.09 | 0.01 | 0.02 | 0     | 0    | 0.03  | 0.06 | 0.05  | 0.07 |
| 9                 | 0.92 | 0.09 | 0.01 | 0.02 | 0     | 0    | 0.03  | 0.06 | 0.05  | 0.07 |
| 10                | 0.93 | 0.09 | 0.01 | 0.02 | 0     | 0    | 0.02  | 0.06 | 0.04  | 0.07 |
| 11                | 0.93 | 0.09 | 0.01 | 0.02 | 0     | 0    | 0.02  | 0.06 | 0.04  | 0.07 |
| 12                | 0.93 | 0.09 | 0.01 | 0.01 | 0     | 0    | 0.02  | 0.06 | 0.04  | 0.07 |

**age=40 years, timing allo >6 months, cmv=others, donor=UD, graft=PBSC, TBI=TBI, In vivo Tcell depletion=no,**

| Landmark time (y) | GRFS | se   | GF   | se   | AGVHD | se   | CGVHD | se   | Death | se   |
|-------------------|------|------|------|------|-------|------|-------|------|-------|------|
| 0                 | 0.5  | 0.18 | 0.02 | 0.01 | 0.26  | 0.21 | 0.06  | 0.06 | 0.16  | 0.09 |
| 1                 | 0.56 | 0.19 | 0.02 | 0.02 | 0.21  | 0.22 | 0.07  | 0.07 | 0.14  | 0.09 |
| 2                 | 0.68 | 0.17 | 0.02 | 0.02 | 0.04  | 0.14 | 0.1   | 0.09 | 0.16  | 0.11 |
| 3                 | 0.74 | 0.14 | 0.02 | 0.02 | 0     | 0    | 0.1   | 0.1  | 0.15  | 0.11 |
| 4                 | 0.79 | 0.14 | 0.01 | 0.02 | 0     | 0    | 0.09  | 0.1  | 0.11  | 0.11 |
| 5                 | 0.82 | 0.14 | 0.01 | 0.02 | 0     | 0    | 0.09  | 0.1  | 0.09  | 0.1  |
| 6                 | 0.85 | 0.13 | 0.01 | 0.02 | 0     | 0    | 0.06  | 0.1  | 0.08  | 0.1  |
| 7                 | 0.88 | 0.12 | 0.01 | 0.02 | 0     | 0    | 0.04  | 0.08 | 0.07  | 0.1  |
| 8                 | 0.89 | 0.12 | 0.01 | 0.02 | 0     | 0    | 0.04  | 0.08 | 0.07  | 0.09 |



|    |      |      |      |      |   |   |      |      |      |      |
|----|------|------|------|------|---|---|------|------|------|------|
| 9  | 0.88 | 0.12 | 0.01 | 0.02 | 0 | 0 | 0.04 | 0.08 | 0.07 | 0.1  |
| 10 | 0.9  | 0.12 | 0.01 | 0.02 | 0 | 0 | 0.03 | 0.08 | 0.06 | 0.09 |
| 11 | 0.91 | 0.12 | 0.01 | 0.02 | 0 | 0 | 0.03 | 0.08 | 0.06 | 0.09 |
| 12 | 0.91 | 0.12 | 0.01 | 0.02 | 0 | 0 | 0.03 | 0.08 | 0.06 | 0.09 |

**age=50 years, timing allo >6 months, cmv=others, donor=UD, graft=PBSC, TBI=TBI, In vivo Tcell depletion=no,**

| Landmark time (y) | GRFS | se   | GF   | se   | AGVHD | se   | CGVHD | se   | Death | se   |
|-------------------|------|------|------|------|-------|------|-------|------|-------|------|
| 0                 | 0.37 | 0.18 | 0.01 | 0.01 | 0.34  | 0.24 | 0.07  | 0.07 | 0.2   | 0.1  |
| 1                 | 0.43 | 0.2  | 0.02 | 0.02 | 0.29  | 0.27 | 0.09  | 0.08 | 0.18  | 0.11 |
| 2                 | 0.58 | 0.19 | 0.02 | 0.02 | 0.06  | 0.19 | 0.13  | 0.11 | 0.22  | 0.14 |
| 3                 | 0.65 | 0.17 | 0.02 | 0.02 | 0     | 0    | 0.13  | 0.12 | 0.2   | 0.14 |
| 4                 | 0.71 | 0.18 | 0.01 | 0.02 | 0     | 0    | 0.12  | 0.13 | 0.15  | 0.14 |
| 5                 | 0.74 | 0.18 | 0.01 | 0.02 | 0     | 0    | 0.13  | 0.14 | 0.12  | 0.13 |
| 6                 | 0.79 | 0.17 | 0.01 | 0.02 | 0     | 0    | 0.09  | 0.13 | 0.11  | 0.13 |
| 7                 | 0.83 | 0.17 | 0.01 | 0.02 | 0     | 0    | 0.06  | 0.11 | 0.1   | 0.13 |
| 8                 | 0.84 | 0.16 | 0.01 | 0.02 | 0     | 0    | 0.06  | 0.11 | 0.09  | 0.13 |
| 9                 | 0.84 | 0.17 | 0.01 | 0.02 | 0     | 0    | 0.06  | 0.12 | 0.1   | 0.13 |
| 10                | 0.86 | 0.16 | 0.01 | 0.02 | 0     | 0    | 0.04  | 0.11 | 0.09  | 0.13 |
| 11                | 0.87 | 0.16 | 0.01 | 0.02 | 0     | 0    | 0.04  | 0.11 | 0.08  | 0.12 |
| 12                | 0.87 | 0.16 | 0.01 | 0.02 | 0     | 0    | 0.05  | 0.11 | 0.08  | 0.12 |

**age=10 years, timing allo <6 months, cmv=others, donor=UD, graft=PBSC, TBI=TBI, In vivo Tcell depletion=no,**

| Landmark time (y) | GRFS | se   | GF   | se   | AGVHD | se   | CGVHD | se   | Death | se   |
|-------------------|------|------|------|------|-------|------|-------|------|-------|------|
| 0                 | 0.69 | 0.19 | 0.01 | 0.01 | 0.19  | 0.2  | 0.06  | 0.07 | 0.05  | 0.04 |
| 1                 | 0.73 | 0.19 | 0.01 | 0.01 | 0.15  | 0.21 | 0.06  | 0.07 | 0.05  | 0.04 |
| 2                 | 0.83 | 0.14 | 0.01 | 0.02 | 0.03  | 0.12 | 0.08  | 0.09 | 0.05  | 0.05 |
| 3                 | 0.87 | 0.1  | 0.01 | 0.02 | 0     | 0    | 0.07  | 0.09 | 0.05  | 0.05 |
| 4                 | 0.89 | 0.1  | 0.01 | 0.01 | 0     | 0    | 0.07  | 0.09 | 0.03  | 0.04 |
| 5                 | 0.9  | 0.1  | 0.01 | 0.01 | 0     | 0    | 0.07  | 0.1  | 0.03  | 0.04 |
| 6                 | 0.92 | 0.1  | 0.01 | 0.01 | 0     | 0    | 0.05  | 0.09 | 0.02  | 0.04 |
| 7                 | 0.94 | 0.08 | 0.01 | 0.01 | 0     | 0    | 0.03  | 0.08 | 0.02  | 0.04 |
| 8                 | 0.95 | 0.08 | 0.01 | 0.01 | 0     | 0    | 0.03  | 0.08 | 0.02  | 0.03 |
| 9                 | 0.95 | 0.08 | 0.01 | 0.01 | 0     | 0    | 0.03  | 0.08 | 0.02  | 0.04 |
| 10                | 0.95 | 0.08 | 0    | 0.01 | 0     | 0    | 0.02  | 0.07 | 0.02  | 0.03 |
| 11                | 0.96 | 0.08 | 0    | 0.01 | 0     | 0    | 0.02  | 0.07 | 0.02  | 0.03 |
| 12                | 0.96 | 0.08 | 0    | 0.01 | 0     | 0    | 0.02  | 0.07 | 0.02  | 0.03 |

**age=20 years, timing allo <6 months, cmv=others, donor=UD, graft=PBSC, TBI=TBI, In vivo Tcell depletion=no,**

| Landmark time (y) | GRFS | se   | GF   | se   | AGVHD | se   | CGVHD | se   | Death | se   |
|-------------------|------|------|------|------|-------|------|-------|------|-------|------|
| 0                 | 0.59 | 0.21 | 0.01 | 0.01 | 0.26  | 0.24 | 0.07  | 0.08 | 0.07  | 0.05 |
| 1                 | 0.64 | 0.23 | 0.01 | 0.01 | 0.21  | 0.25 | 0.08  | 0.09 | 0.06  | 0.05 |
| 2                 | 0.77 | 0.18 | 0.01 | 0.02 | 0.04  | 0.16 | 0.11  | 0.12 | 0.07  | 0.06 |
| 3                 | 0.82 | 0.13 | 0.01 | 0.02 | 0     | 0    | 0.11  | 0.12 | 0.06  | 0.06 |
| 4                 | 0.85 | 0.13 | 0.01 | 0.01 | 0     | 0    | 0.09  | 0.13 | 0.05  | 0.06 |

|    |      |      |      |      |   |   |      |      |      |      |
|----|------|------|------|------|---|---|------|------|------|------|
| 5  | 0.86 | 0.13 | 0.01 | 0.01 | 0 | 0 | 0.09 | 0.13 | 0.04 | 0.05 |
| 6  | 0.89 | 0.13 | 0.01 | 0.01 | 0 | 0 | 0.07 | 0.12 | 0.03 | 0.05 |
| 7  | 0.92 | 0.11 | 0.01 | 0.01 | 0 | 0 | 0.04 | 0.1  | 0.03 | 0.05 |
| 8  | 0.92 | 0.11 | 0.01 | 0.01 | 0 | 0 | 0.04 | 0.1  | 0.03 | 0.05 |
| 9  | 0.92 | 0.11 | 0.01 | 0.01 | 0 | 0 | 0.04 | 0.1  | 0.03 | 0.05 |
| 10 | 0.94 | 0.11 | 0.01 | 0.01 | 0 | 0 | 0.03 | 0.09 | 0.03 | 0.05 |
| 11 | 0.94 | 0.1  | 0.01 | 0.01 | 0 | 0 | 0.03 | 0.1  | 0.02 | 0.04 |
| 12 | 0.94 | 0.1  | 0    | 0.01 | 0 | 0 | 0.03 | 0.1  | 0.02 | 0.05 |

**age=30 years, timing allo <6 months, cmv=others, donor=UD, graft=PBSC, TBI=TBI, In vivo Tcell depletion=no,**

| Landmark time (y) | GRFS | se   | GF   | se   | AGVHD | se   | CGVHD | se   | Death | se   |
|-------------------|------|------|------|------|-------|------|-------|------|-------|------|
| 0                 | 0.47 | 0.23 | 0.01 | 0.01 | 0.34  | 0.28 | 0.09  | 0.1  | 0.09  | 0.06 |
| 1                 | 0.52 | 0.25 | 0.01 | 0.01 | 0.28  | 0.3  | 0.1   | 0.11 | 0.08  | 0.06 |
| 2                 | 0.68 | 0.22 | 0.01 | 0.02 | 0.06  | 0.21 | 0.15  | 0.15 | 0.1   | 0.08 |
| 3                 | 0.75 | 0.17 | 0.01 | 0.02 | 0     | 0    | 0.15  | 0.16 | 0.09  | 0.08 |
| 4                 | 0.79 | 0.18 | 0.01 | 0.02 | 0     | 0    | 0.13  | 0.17 | 0.07  | 0.07 |
| 5                 | 0.81 | 0.18 | 0.01 | 0.01 | 0     | 0    | 0.14  | 0.17 | 0.05  | 0.07 |
| 6                 | 0.85 | 0.17 | 0.01 | 0.01 | 0     | 0    | 0.1   | 0.16 | 0.05  | 0.07 |
| 7                 | 0.89 | 0.15 | 0.01 | 0.01 | 0     | 0    | 0.06  | 0.14 | 0.04  | 0.07 |
| 8                 | 0.89 | 0.15 | 0.01 | 0.01 | 0     | 0    | 0.06  | 0.14 | 0.04  | 0.06 |
| 9                 | 0.89 | 0.15 | 0.01 | 0.02 | 0     | 0    | 0.06  | 0.14 | 0.04  | 0.07 |
| 10                | 0.91 | 0.14 | 0.01 | 0.01 | 0     | 0    | 0.05  | 0.13 | 0.04  | 0.06 |
| 11                | 0.91 | 0.14 | 0.01 | 0.01 | 0     | 0    | 0.05  | 0.13 | 0.03  | 0.06 |
| 12                | 0.91 | 0.14 | 0    | 0.01 | 0     | 0    | 0.05  | 0.13 | 0.03  | 0.06 |

**age=40 years, timing allo <6 months, cmv=others, donor=UD, graft=PBSC, TBI=TBI, In vivo Tcell depletion=no,**

| Landmark time (y) | GRFS | se   | GF   | se   | AGVHD | se   | CGVHD | se   | Death | se   |
|-------------------|------|------|------|------|-------|------|-------|------|-------|------|
| 0                 | 0.34 | 0.23 | 0.01 | 0.01 | 0.44  | 0.32 | 0.1   | 0.12 | 0.11  | 0.07 |
| 1                 | 0.4  | 0.26 | 0.01 | 0.01 | 0.37  | 0.36 | 0.12  | 0.14 | 0.1   | 0.08 |
| 2                 | 0.58 | 0.26 | 0.01 | 0.02 | 0.08  | 0.28 | 0.2   | 0.2  | 0.13  | 0.1  |
| 3                 | 0.65 | 0.22 | 0.01 | 0.02 | 0     | 0    | 0.21  | 0.21 | 0.12  | 0.1  |
| 4                 | 0.71 | 0.23 | 0.01 | 0.02 | 0     | 0    | 0.19  | 0.22 | 0.09  | 0.1  |
| 5                 | 0.73 | 0.23 | 0.01 | 0.02 | 0     | 0    | 0.19  | 0.23 | 0.07  | 0.09 |
| 6                 | 0.79 | 0.23 | 0.01 | 0.02 | 0     | 0    | 0.14  | 0.22 | 0.06  | 0.09 |
| 7                 | 0.84 | 0.21 | 0.01 | 0.02 | 0     | 0    | 0.09  | 0.2  | 0.06  | 0.09 |
| 8                 | 0.85 | 0.21 | 0.01 | 0.02 | 0     | 0    | 0.09  | 0.2  | 0.06  | 0.09 |
| 9                 | 0.85 | 0.21 | 0.01 | 0.02 | 0     | 0    | 0.09  | 0.2  | 0.06  | 0.09 |
| 10                | 0.87 | 0.2  | 0.01 | 0.02 | 0     | 0    | 0.07  | 0.18 | 0.05  | 0.09 |
| 11                | 0.88 | 0.2  | 0.01 | 0.02 | 0     | 0    | 0.07  | 0.19 | 0.05  | 0.09 |
| 12                | 0.88 | 0.2  | 0.01 | 0.01 | 0     | 0    | 0.07  | 0.19 | 0.05  | 0.09 |

**age=50 years, timing allo <6 months, cmv=others, donor=UD, graft=PBSC, TBI=TBI, In vivo Tcell depletion=no,**

| Landmark time (y) | GRFS | se  | GF   | se   | AGVHD | se   | CGVHD | se   | Death | se   |
|-------------------|------|-----|------|------|-------|------|-------|------|-------|------|
| 0                 | 0.21 | 0.2 | 0.01 | 0.01 | 0.55  | 0.34 | 0.11  | 0.13 | 0.12  | 0.09 |

|    |      |      |      |      |      |      |      |      |      |      |
|----|------|------|------|------|------|------|------|------|------|------|
| 1  | 0.26 | 0.25 | 0.01 | 0.01 | 0.48 | 0.41 | 0.13 | 0.16 | 0.11 | 0.11 |
| 2  | 0.45 | 0.29 | 0.01 | 0.02 | 0.11 | 0.37 | 0.26 | 0.25 | 0.17 | 0.14 |
| 3  | 0.54 | 0.26 | 0.02 | 0.02 | 0    | 0    | 0.28 | 0.27 | 0.17 | 0.14 |
| 4  | 0.61 | 0.29 | 0.01 | 0.02 | 0    | 0    | 0.26 | 0.29 | 0.12 | 0.13 |
| 5  | 0.63 | 0.3  | 0.01 | 0.02 | 0    | 0    | 0.27 | 0.3  | 0.1  | 0.12 |
| 6  | 0.7  | 0.31 | 0.01 | 0.02 | 0    | 0    | 0.2  | 0.31 | 0.09 | 0.12 |
| 7  | 0.78 | 0.29 | 0.01 | 0.02 | 0    | 0    | 0.13 | 0.28 | 0.09 | 0.13 |
| 8  | 0.79 | 0.29 | 0.01 | 0.02 | 0    | 0    | 0.13 | 0.28 | 0.08 | 0.12 |
| 9  | 0.78 | 0.29 | 0.01 | 0.02 | 0    | 0    | 0.13 | 0.28 | 0.08 | 0.13 |
| 10 | 0.82 | 0.28 | 0.01 | 0.02 | 0    | 0    | 0.1  | 0.26 | 0.08 | 0.12 |
| 11 | 0.83 | 0.28 | 0.01 | 0.02 | 0    | 0    | 0.1  | 0.26 | 0.07 | 0.12 |
| 12 | 0.82 | 0.28 | 0.01 | 0.02 | 0    | 0    | 0.1  | 0.27 | 0.07 | 0.12 |

**age=10 years, timing allo >6 months, cmv=D-/R-, donor=MRD, graft=BM, TBI=no TBI, In vivo Tcell depletion=yes,**

| Landmark time (y) | GRFS | se   | GF   | se   | AGVHD | se | CGVHD | se   | Death | se   |
|-------------------|------|------|------|------|-------|----|-------|------|-------|------|
| 0                 | 0.88 | 0.04 | 0.03 | 0.03 | 0     | 0  | 0.01  | 0.01 | 0.07  | 0.03 |
| 1                 | 0.89 | 0.04 | 0.03 | 0.03 | 0     | 0  | 0.02  | 0.01 | 0.06  | 0.03 |
| 2                 | 0.9  | 0.04 | 0.03 | 0.03 | 0     | 0  | 0.02  | 0.01 | 0.06  | 0.03 |
| 3                 | 0.91 | 0.04 | 0.03 | 0.03 | 0     | 0  | 0.02  | 0.01 | 0.05  | 0.03 |
| 4                 | 0.93 | 0.04 | 0.02 | 0.03 | 0     | 0  | 0.01  | 0.01 | 0.04  | 0.03 |
| 5                 | 0.94 | 0.04 | 0.01 | 0.02 | 0     | 0  | 0.01  | 0.01 | 0.03  | 0.03 |
| 6                 | 0.95 | 0.04 | 0.01 | 0.02 | 0     | 0  | 0.01  | 0.01 | 0.02  | 0.02 |
| 7                 | 0.96 | 0.03 | 0.01 | 0.02 | 0     | 0  | 0.01  | 0.01 | 0.02  | 0.02 |
| 8                 | 0.96 | 0.03 | 0.01 | 0.02 | 0     | 0  | 0.01  | 0.01 | 0.02  | 0.02 |
| 9                 | 0.96 | 0.04 | 0.01 | 0.02 | 0     | 0  | 0.01  | 0.01 | 0.02  | 0.02 |
| 10                | 0.97 | 0.03 | 0.01 | 0.02 | 0     | 0  | 0     | 0.01 | 0.02  | 0.02 |
| 11                | 0.97 | 0.03 | 0.01 | 0.02 | 0     | 0  | 0     | 0.01 | 0.02  | 0.02 |
| 12                | 0.97 | 0.03 | 0.01 | 0.02 | 0     | 0  | 0     | 0.01 | 0.02  | 0.02 |

**age=20 years, timing allo >6 months, cmv=D-/R-, donor=MRD, graft=BM, TBI=no TBI, In vivo Tcell depletion=yes,**

| Landmark time (y) | GRFS | se   | GF   | se   | AGVHD | se | CGVHD | se   | Death | se   |
|-------------------|------|------|------|------|-------|----|-------|------|-------|------|
| 0                 | 0.84 | 0.05 | 0.04 | 0.03 | 0     | 0  | 0.02  | 0.02 | 0.1   | 0.04 |
| 1                 | 0.85 | 0.05 | 0.04 | 0.03 | 0     | 0  | 0.02  | 0.02 | 0.08  | 0.04 |
| 2                 | 0.87 | 0.05 | 0.03 | 0.03 | 0     | 0  | 0.02  | 0.02 | 0.08  | 0.04 |
| 3                 | 0.88 | 0.05 | 0.03 | 0.03 | 0     | 0  | 0.02  | 0.02 | 0.07  | 0.04 |
| 4                 | 0.91 | 0.05 | 0.02 | 0.03 | 0     | 0  | 0.02  | 0.02 | 0.05  | 0.04 |
| 5                 | 0.92 | 0.05 | 0.02 | 0.03 | 0     | 0  | 0.02  | 0.02 | 0.04  | 0.03 |
| 6                 | 0.94 | 0.04 | 0.01 | 0.02 | 0     | 0  | 0.01  | 0.02 | 0.04  | 0.03 |
| 7                 | 0.94 | 0.04 | 0.01 | 0.02 | 0     | 0  | 0.01  | 0.01 | 0.03  | 0.03 |
| 8                 | 0.95 | 0.04 | 0.01 | 0.02 | 0     | 0  | 0.01  | 0.01 | 0.03  | 0.03 |
| 9                 | 0.95 | 0.04 | 0.01 | 0.03 | 0     | 0  | 0.01  | 0.01 | 0.03  | 0.03 |
| 10                | 0.95 | 0.04 | 0.01 | 0.02 | 0     | 0  | 0.01  | 0.01 | 0.03  | 0.03 |
| 11                | 0.96 | 0.04 | 0.01 | 0.02 | 0     | 0  | 0.01  | 0.01 | 0.02  | 0.03 |
| 12                | 0.96 | 0.04 | 0.01 | 0.02 | 0     | 0  | 0.01  | 0.01 | 0.03  | 0.03 |

**age=30 years, timing allo >6 months, cmv=D-/R-, donor=MRD, graft=BM, TBI=no TBI, In vivo Tcell depletion=yes,**

| Landmark time (y) | GRFS | se   | GF   | se   | AGVHD | se   | CGVHD | se   | Death | se   |
|-------------------|------|------|------|------|-------|------|-------|------|-------|------|
| 0                 | 0.79 | 0.06 | 0.04 | 0.03 | 0.01  | 0.01 | 0.03  | 0.02 | 0.13  | 0.05 |
| 1                 | 0.81 | 0.06 | 0.04 | 0.03 | 0     | 0.01 | 0.03  | 0.02 | 0.12  | 0.05 |
| 2                 | 0.82 | 0.06 | 0.03 | 0.03 | 0     | 0    | 0.03  | 0.03 | 0.11  | 0.05 |
| 3                 | 0.84 | 0.06 | 0.03 | 0.03 | 0     | 0    | 0.03  | 0.03 | 0.1   | 0.05 |
| 4                 | 0.88 | 0.06 | 0.02 | 0.03 | 0     | 0    | 0.03  | 0.03 | 0.07  | 0.05 |
| 5                 | 0.9  | 0.06 | 0.02 | 0.03 | 0     | 0    | 0.03  | 0.03 | 0.06  | 0.05 |
| 6                 | 0.91 | 0.06 | 0.02 | 0.03 | 0     | 0    | 0.02  | 0.02 | 0.05  | 0.04 |
| 7                 | 0.92 | 0.05 | 0.02 | 0.03 | 0     | 0    | 0.01  | 0.02 | 0.05  | 0.04 |
| 8                 | 0.93 | 0.05 | 0.02 | 0.03 | 0     | 0    | 0.01  | 0.02 | 0.04  | 0.04 |
| 9                 | 0.93 | 0.05 | 0.02 | 0.03 | 0     | 0    | 0.01  | 0.02 | 0.04  | 0.04 |
| 10                | 0.94 | 0.05 | 0.01 | 0.03 | 0     | 0    | 0.01  | 0.02 | 0.04  | 0.04 |
| 11                | 0.94 | 0.05 | 0.01 | 0.03 | 0     | 0    | 0.01  | 0.02 | 0.04  | 0.04 |
| 12                | 0.94 | 0.05 | 0.01 | 0.02 | 0     | 0    | 0.01  | 0.02 | 0.04  | 0.04 |

**age=40 years, timing allo >6 months, cmv=D-/R-, donor=MRD, graft=BM, TBI=no TBI, In vivo Tcell depletion=yes,**

| Landmark time (y) | GRFS | se   | GF   | se   | AGVHD | se   | CGVHD | se   | Death | se   |
|-------------------|------|------|------|------|-------|------|-------|------|-------|------|
| 0                 | 0.72 | 0.08 | 0.05 | 0.03 | 0.01  | 0.01 | 0.04  | 0.03 | 0.19  | 0.07 |
| 1                 | 0.74 | 0.08 | 0.04 | 0.03 | 0.01  | 0.01 | 0.04  | 0.03 | 0.16  | 0.07 |
| 2                 | 0.76 | 0.08 | 0.04 | 0.03 | 0     | 0    | 0.05  | 0.04 | 0.16  | 0.07 |
| 3                 | 0.78 | 0.08 | 0.04 | 0.03 | 0     | 0    | 0.05  | 0.04 | 0.14  | 0.07 |
| 4                 | 0.83 | 0.08 | 0.02 | 0.03 | 0     | 0    | 0.04  | 0.04 | 0.1   | 0.07 |
| 5                 | 0.86 | 0.08 | 0.02 | 0.03 | 0     | 0    | 0.04  | 0.04 | 0.08  | 0.06 |
| 6                 | 0.88 | 0.07 | 0.02 | 0.03 | 0     | 0    | 0.03  | 0.04 | 0.07  | 0.06 |
| 7                 | 0.9  | 0.07 | 0.02 | 0.03 | 0     | 0    | 0.02  | 0.03 | 0.07  | 0.06 |
| 8                 | 0.9  | 0.07 | 0.02 | 0.03 | 0     | 0    | 0.02  | 0.03 | 0.06  | 0.06 |
| 9                 | 0.9  | 0.07 | 0.02 | 0.03 | 0     | 0    | 0.02  | 0.03 | 0.06  | 0.06 |
| 10                | 0.91 | 0.07 | 0.02 | 0.03 | 0     | 0    | 0.01  | 0.03 | 0.06  | 0.06 |
| 11                | 0.92 | 0.07 | 0.02 | 0.03 | 0     | 0    | 0.01  | 0.03 | 0.05  | 0.06 |
| 12                | 0.92 | 0.07 | 0.01 | 0.03 | 0     | 0    | 0.01  | 0.03 | 0.05  | 0.06 |

**age=50 years, timing allo >6 months, cmv=D-/R-, donor=MRD, graft=BM, TBI=no TBI, In vivo Tcell depletion=yes,**

| Landmark time (y) | GRFS | se   | GF   | se   | AGVHD | se   | CGVHD | se   | Death | se   |
|-------------------|------|------|------|------|-------|------|-------|------|-------|------|
| 0                 | 0.63 | 0.1  | 0.05 | 0.04 | 0.01  | 0.01 | 0.06  | 0.04 | 0.26  | 0.09 |
| 1                 | 0.66 | 0.1  | 0.05 | 0.04 | 0.01  | 0.01 | 0.06  | 0.05 | 0.23  | 0.1  |
| 2                 | 0.68 | 0.11 | 0.04 | 0.04 | 0     | 0.01 | 0.07  | 0.05 | 0.22  | 0.1  |
| 3                 | 0.71 | 0.11 | 0.04 | 0.04 | 0     | 0    | 0.07  | 0.05 | 0.19  | 0.1  |
| 4                 | 0.77 | 0.11 | 0.03 | 0.04 | 0     | 0    | 0.06  | 0.06 | 0.14  | 0.1  |
| 5                 | 0.8  | 0.11 | 0.02 | 0.03 | 0     | 0    | 0.06  | 0.06 | 0.11  | 0.09 |
| 6                 | 0.83 | 0.11 | 0.02 | 0.03 | 0     | 0    | 0.05  | 0.05 | 0.1   | 0.09 |
| 7                 | 0.86 | 0.1  | 0.02 | 0.03 | 0     | 0    | 0.03  | 0.05 | 0.09  | 0.09 |
| 8                 | 0.87 | 0.1  | 0.02 | 0.03 | 0     | 0    | 0.03  | 0.05 | 0.09  | 0.09 |

|    |      |     |      |      |   |   |      |      |      |      |
|----|------|-----|------|------|---|---|------|------|------|------|
| 9  | 0.86 | 0.1 | 0.02 | 0.04 | 0 | 0 | 0.03 | 0.05 | 0.09 | 0.09 |
| 10 | 0.88 | 0.1 | 0.02 | 0.03 | 0 | 0 | 0.02 | 0.04 | 0.08 | 0.09 |
| 11 | 0.89 | 0.1 | 0.02 | 0.03 | 0 | 0 | 0.02 | 0.04 | 0.07 | 0.08 |
| 12 | 0.89 | 0.1 | 0.01 | 0.03 | 0 | 0 | 0.02 | 0.04 | 0.07 | 0.09 |

**age=10 years, timing allo <6 months, cmv=D-/R-, donor=MRD, graft=BM, TBI=no TBI, In vivo Tcell depletion=yes,**

| Landmark time (y) | GRFS | se   | GF   | se   | AGVHD | se   | CGVHD | se   | Death | se   |
|-------------------|------|------|------|------|-------|------|-------|------|-------|------|
| 0                 | 0.87 | 0.04 | 0.03 | 0.02 | 0.01  | 0.01 | 0.03  | 0.03 | 0.06  | 0.03 |
| 1                 | 0.88 | 0.04 | 0.03 | 0.03 | 0     | 0.01 | 0.03  | 0.03 | 0.05  | 0.03 |
| 2                 | 0.89 | 0.05 | 0.02 | 0.02 | 0     | 0    | 0.04  | 0.03 | 0.05  | 0.03 |
| 3                 | 0.9  | 0.04 | 0.02 | 0.02 | 0     | 0    | 0.04  | 0.03 | 0.04  | 0.03 |
| 4                 | 0.92 | 0.04 | 0.02 | 0.02 | 0     | 0    | 0.03  | 0.03 | 0.03  | 0.02 |
| 5                 | 0.93 | 0.04 | 0.01 | 0.02 | 0     | 0    | 0.03  | 0.03 | 0.02  | 0.02 |
| 6                 | 0.94 | 0.04 | 0.01 | 0.02 | 0     | 0    | 0.02  | 0.03 | 0.02  | 0.02 |
| 7                 | 0.96 | 0.04 | 0.01 | 0.02 | 0     | 0    | 0.01  | 0.02 | 0.02  | 0.02 |
| 8                 | 0.96 | 0.04 | 0.01 | 0.02 | 0     | 0    | 0.01  | 0.02 | 0.02  | 0.02 |
| 9                 | 0.96 | 0.04 | 0.01 | 0.02 | 0     | 0    | 0.01  | 0.02 | 0.02  | 0.02 |
| 10                | 0.96 | 0.03 | 0.01 | 0.02 | 0     | 0    | 0.01  | 0.02 | 0.02  | 0.02 |
| 11                | 0.96 | 0.03 | 0.01 | 0.02 | 0     | 0    | 0.01  | 0.02 | 0.01  | 0.02 |
| 12                | 0.97 | 0.03 | 0.01 | 0.02 | 0     | 0    | 0.01  | 0.02 | 0.02  | 0.02 |

**age=20 years, timing allo <6 months, cmv=D-/R-, donor=MRD, graft=BM, TBI=no TBI, In vivo Tcell depletion=yes,**

| Landmark time (y) | GRFS | se   | GF   | se   | AGVHD | se   | CGVHD | se   | Death | se   |
|-------------------|------|------|------|------|-------|------|-------|------|-------|------|
| 0                 | 0.83 | 0.05 | 0.04 | 0.03 | 0.01  | 0.01 | 0.05  | 0.03 | 0.08  | 0.04 |
| 1                 | 0.84 | 0.06 | 0.03 | 0.03 | 0.01  | 0.01 | 0.05  | 0.04 | 0.07  | 0.04 |
| 2                 | 0.85 | 0.06 | 0.03 | 0.03 | 0     | 0    | 0.06  | 0.04 | 0.07  | 0.04 |
| 3                 | 0.86 | 0.06 | 0.03 | 0.03 | 0     | 0    | 0.05  | 0.04 | 0.06  | 0.04 |
| 4                 | 0.89 | 0.06 | 0.02 | 0.02 | 0     | 0    | 0.05  | 0.04 | 0.04  | 0.03 |
| 5                 | 0.9  | 0.05 | 0.01 | 0.02 | 0     | 0    | 0.05  | 0.04 | 0.03  | 0.03 |
| 6                 | 0.92 | 0.05 | 0.01 | 0.02 | 0     | 0    | 0.03  | 0.04 | 0.03  | 0.03 |
| 7                 | 0.94 | 0.05 | 0.01 | 0.02 | 0     | 0    | 0.02  | 0.03 | 0.03  | 0.03 |
| 8                 | 0.94 | 0.05 | 0.01 | 0.02 | 0     | 0    | 0.02  | 0.03 | 0.03  | 0.03 |
| 9                 | 0.94 | 0.05 | 0.01 | 0.02 | 0     | 0    | 0.02  | 0.03 | 0.03  | 0.03 |
| 10                | 0.95 | 0.04 | 0.01 | 0.02 | 0     | 0    | 0.02  | 0.03 | 0.02  | 0.03 |
| 11                | 0.95 | 0.04 | 0.01 | 0.02 | 0     | 0    | 0.02  | 0.03 | 0.02  | 0.03 |
| 12                | 0.95 | 0.04 | 0.01 | 0.02 | 0     | 0    | 0.02  | 0.03 | 0.02  | 0.03 |

**age=30 years, timing allo <6 months, cmv=D-/R-, donor=MRD, graft=BM, TBI=no TBI, In vivo Tcell depletion=yes,**

| Landmark time (y) | GRFS | se   | GF   | se   | AGVHD | se   | CGVHD | se   | Death | se   |
|-------------------|------|------|------|------|-------|------|-------|------|-------|------|
| 0                 | 0.77 | 0.07 | 0.04 | 0.03 | 0.01  | 0.01 | 0.07  | 0.05 | 0.12  | 0.05 |
| 1                 | 0.78 | 0.07 | 0.04 | 0.03 | 0.01  | 0.01 | 0.07  | 0.05 | 0.1   | 0.05 |
| 2                 | 0.79 | 0.08 | 0.03 | 0.03 | 0     | 0.01 | 0.08  | 0.05 | 0.1   | 0.05 |
| 3                 | 0.81 | 0.08 | 0.03 | 0.03 | 0     | 0    | 0.07  | 0.06 | 0.08  | 0.05 |
| 4                 | 0.85 | 0.08 | 0.02 | 0.03 | 0     | 0    | 0.07  | 0.06 | 0.06  | 0.05 |

|    |      |      |      |      |   |   |      |      |      |      |
|----|------|------|------|------|---|---|------|------|------|------|
| 5  | 0.87 | 0.07 | 0.02 | 0.03 | 0 | 0 | 0.07 | 0.06 | 0.05 | 0.04 |
| 6  | 0.89 | 0.07 | 0.01 | 0.02 | 0 | 0 | 0.05 | 0.05 | 0.04 | 0.04 |
| 7  | 0.92 | 0.07 | 0.01 | 0.02 | 0 | 0 | 0.03 | 0.05 | 0.04 | 0.04 |
| 8  | 0.92 | 0.06 | 0.01 | 0.02 | 0 | 0 | 0.03 | 0.05 | 0.04 | 0.04 |
| 9  | 0.92 | 0.07 | 0.01 | 0.03 | 0 | 0 | 0.03 | 0.05 | 0.04 | 0.04 |
| 10 | 0.93 | 0.06 | 0.01 | 0.02 | 0 | 0 | 0.02 | 0.04 | 0.03 | 0.04 |
| 11 | 0.93 | 0.06 | 0.01 | 0.02 | 0 | 0 | 0.02 | 0.04 | 0.03 | 0.04 |
| 12 | 0.93 | 0.06 | 0.01 | 0.02 | 0 | 0 | 0.02 | 0.04 | 0.03 | 0.04 |

**age=40 years, timing allo <6 months, cmv=D-/R-, donor=MRD, graft=BM, TBI=no TBI, In vivo Tcell depletion=yes,**

| Landmark time (y) | GRFS | se   | GF   | se   | AGVHD | se   | CGVHD | se   | Death | se   |
|-------------------|------|------|------|------|-------|------|-------|------|-------|------|
| 0                 | 0.69 | 0.1  | 0.04 | 0.03 | 0.02  | 0.02 | 0.09  | 0.07 | 0.16  | 0.07 |
| 1                 | 0.71 | 0.1  | 0.04 | 0.03 | 0.01  | 0.02 | 0.1   | 0.07 | 0.14  | 0.07 |
| 2                 | 0.72 | 0.11 | 0.03 | 0.03 | 0     | 0.01 | 0.11  | 0.08 | 0.13  | 0.07 |
| 3                 | 0.75 | 0.11 | 0.03 | 0.03 | 0     | 0    | 0.11  | 0.08 | 0.12  | 0.07 |
| 4                 | 0.8  | 0.11 | 0.02 | 0.03 | 0     | 0    | 0.09  | 0.09 | 0.09  | 0.07 |
| 5                 | 0.82 | 0.11 | 0.02 | 0.03 | 0     | 0    | 0.1   | 0.09 | 0.07  | 0.06 |
| 6                 | 0.85 | 0.1  | 0.02 | 0.03 | 0     | 0    | 0.07  | 0.08 | 0.06  | 0.06 |
| 7                 | 0.88 | 0.1  | 0.02 | 0.03 | 0     | 0    | 0.04  | 0.07 | 0.06  | 0.06 |
| 8                 | 0.89 | 0.09 | 0.02 | 0.03 | 0     | 0    | 0.04  | 0.07 | 0.05  | 0.06 |
| 9                 | 0.89 | 0.1  | 0.02 | 0.03 | 0     | 0    | 0.04  | 0.07 | 0.05  | 0.06 |
| 10                | 0.9  | 0.09 | 0.01 | 0.03 | 0     | 0    | 0.03  | 0.06 | 0.05  | 0.06 |
| 11                | 0.91 | 0.09 | 0.01 | 0.03 | 0     | 0    | 0.03  | 0.07 | 0.04  | 0.06 |
| 12                | 0.91 | 0.09 | 0.01 | 0.03 | 0     | 0    | 0.03  | 0.07 | 0.04  | 0.06 |

**age=50 years, timing allo <6 months, cmv=D-/R-, donor=MRD, graft=BM, TBI=no TBI, In vivo Tcell depletion=yes,**

| Landmark time (y) | GRFS | se   | GF   | se   | AGVHD | se   | CGVHD | se   | Death | se   |
|-------------------|------|------|------|------|-------|------|-------|------|-------|------|
| 0                 | 0.59 | 0.13 | 0.04 | 0.04 | 0.02  | 0.03 | 0.13  | 0.1  | 0.22  | 0.1  |
| 1                 | 0.62 | 0.13 | 0.04 | 0.04 | 0.02  | 0.03 | 0.13  | 0.1  | 0.19  | 0.1  |
| 2                 | 0.63 | 0.14 | 0.03 | 0.04 | 0     | 0.01 | 0.15  | 0.12 | 0.18  | 0.11 |
| 3                 | 0.66 | 0.15 | 0.04 | 0.04 | 0     | 0    | 0.15  | 0.12 | 0.16  | 0.11 |
| 4                 | 0.72 | 0.16 | 0.02 | 0.03 | 0     | 0    | 0.13  | 0.13 | 0.12  | 0.1  |
| 5                 | 0.75 | 0.16 | 0.02 | 0.03 | 0     | 0    | 0.14  | 0.13 | 0.1   | 0.1  |
| 6                 | 0.8  | 0.15 | 0.02 | 0.03 | 0     | 0    | 0.1   | 0.13 | 0.09  | 0.09 |
| 7                 | 0.84 | 0.14 | 0.02 | 0.03 | 0     | 0    | 0.06  | 0.11 | 0.08  | 0.1  |
| 8                 | 0.85 | 0.14 | 0.02 | 0.03 | 0     | 0    | 0.06  | 0.11 | 0.07  | 0.09 |
| 9                 | 0.84 | 0.14 | 0.02 | 0.04 | 0     | 0    | 0.06  | 0.11 | 0.08  | 0.09 |
| 10                | 0.87 | 0.14 | 0.02 | 0.03 | 0     | 0    | 0.05  | 0.1  | 0.07  | 0.09 |
| 11                | 0.87 | 0.13 | 0.02 | 0.03 | 0     | 0    | 0.05  | 0.1  | 0.06  | 0.09 |
| 12                | 0.87 | 0.14 | 0.01 | 0.03 | 0     | 0    | 0.05  | 0.11 | 0.06  | 0.09 |

**age=10 years, timing allo >6 months, cmv=others, donor=MRD, graft=BM, TBI=no TBI, In vivo Tcell depletion=yes,**

| Landmark time (y) | GRFS | se   | GF   | se   | AGVHD | se   | CGVHD | se   | Death | se   |
|-------------------|------|------|------|------|-------|------|-------|------|-------|------|
| 0                 | 0.78 | 0.07 | 0.15 | 0.07 | 0.01  | 0.01 | 0.01  | 0.01 | 0.05  | 0.02 |

|    |      |      |      |      |   |      |      |      |      |      |
|----|------|------|------|------|---|------|------|------|------|------|
| 1  | 0.8  | 0.07 | 0.14 | 0.07 | 0 | 0.01 | 0.01 | 0.01 | 0.05 | 0.02 |
| 2  | 0.83 | 0.07 | 0.12 | 0.07 | 0 | 0    | 0.01 | 0.01 | 0.04 | 0.02 |
| 3  | 0.83 | 0.07 | 0.12 | 0.07 | 0 | 0    | 0.01 | 0.01 | 0.04 | 0.02 |
| 4  | 0.88 | 0.07 | 0.08 | 0.06 | 0 | 0    | 0.01 | 0.01 | 0.03 | 0.02 |
| 5  | 0.9  | 0.06 | 0.06 | 0.06 | 0 | 0    | 0.01 | 0.01 | 0.02 | 0.02 |
| 6  | 0.92 | 0.06 | 0.05 | 0.06 | 0 | 0    | 0.01 | 0.01 | 0.02 | 0.02 |
| 7  | 0.92 | 0.06 | 0.05 | 0.06 | 0 | 0    | 0    | 0.01 | 0.02 | 0.02 |
| 8  | 0.92 | 0.06 | 0.05 | 0.06 | 0 | 0    | 0    | 0.01 | 0.02 | 0.02 |
| 9  | 0.92 | 0.06 | 0.06 | 0.06 | 0 | 0    | 0    | 0.01 | 0.02 | 0.02 |
| 10 | 0.93 | 0.06 | 0.05 | 0.06 | 0 | 0    | 0    | 0.01 | 0.02 | 0.02 |
| 11 | 0.93 | 0.06 | 0.05 | 0.06 | 0 | 0    | 0    | 0.01 | 0.01 | 0.02 |
| 12 | 0.94 | 0.06 | 0.04 | 0.05 | 0 | 0    | 0    | 0.01 | 0.01 | 0.02 |

**age=20 years, timing allo >6 months, cmv=others, donor=MRD, graft=BM, TBI=no TBI, In vivo Tcell depletion=yes,**

| Landmark time (y) | GRFS | se   | GF   | se   | AGVHD | se   | CGVHD | se   | Death | se   |
|-------------------|------|------|------|------|-------|------|-------|------|-------|------|
| 0                 | 0.74 | 0.07 | 0.16 | 0.06 | 0.01  | 0.01 | 0.02  | 0.01 | 0.07  | 0.03 |
| 1                 | 0.76 | 0.07 | 0.16 | 0.06 | 0.01  | 0.01 | 0.02  | 0.01 | 0.06  | 0.03 |
| 2                 | 0.79 | 0.07 | 0.13 | 0.06 | 0     | 0    | 0.02  | 0.01 | 0.06  | 0.03 |
| 3                 | 0.8  | 0.07 | 0.13 | 0.07 | 0     | 0    | 0.02  | 0.01 | 0.05  | 0.03 |
| 4                 | 0.86 | 0.06 | 0.08 | 0.06 | 0     | 0    | 0.02  | 0.01 | 0.04  | 0.03 |
| 5                 | 0.88 | 0.06 | 0.07 | 0.06 | 0     | 0    | 0.02  | 0.01 | 0.03  | 0.02 |
| 6                 | 0.9  | 0.06 | 0.06 | 0.05 | 0     | 0    | 0.01  | 0.01 | 0.03  | 0.02 |
| 7                 | 0.91 | 0.06 | 0.06 | 0.06 | 0     | 0    | 0.01  | 0.01 | 0.03  | 0.02 |
| 8                 | 0.91 | 0.06 | 0.06 | 0.06 | 0     | 0    | 0.01  | 0.01 | 0.02  | 0.02 |
| 9                 | 0.9  | 0.06 | 0.06 | 0.06 | 0     | 0    | 0.01  | 0.01 | 0.02  | 0.02 |
| 10                | 0.92 | 0.06 | 0.05 | 0.06 | 0     | 0    | 0.01  | 0.01 | 0.02  | 0.02 |
| 11                | 0.92 | 0.06 | 0.05 | 0.06 | 0     | 0    | 0.01  | 0.01 | 0.02  | 0.02 |
| 12                | 0.93 | 0.06 | 0.05 | 0.05 | 0     | 0    | 0.01  | 0.01 | 0.02  | 0.02 |

**age=30 years, timing allo >6 months, cmv=others, donor=MRD, graft=BM, TBI=no TBI, In vivo Tcell depletion=yes,**

| Landmark time (y) | GRFS | se   | GF   | se   | AGVHD | se   | CGVHD | se   | Death | se   |
|-------------------|------|------|------|------|-------|------|-------|------|-------|------|
| 0                 | 0.69 | 0.07 | 0.18 | 0.06 | 0.01  | 0.01 | 0.02  | 0.01 | 0.1   | 0.03 |
| 1                 | 0.71 | 0.07 | 0.17 | 0.06 | 0.01  | 0.01 | 0.02  | 0.01 | 0.09  | 0.03 |
| 2                 | 0.74 | 0.07 | 0.14 | 0.06 | 0     | 0    | 0.03  | 0.02 | 0.09  | 0.03 |
| 3                 | 0.76 | 0.07 | 0.14 | 0.06 | 0     | 0    | 0.02  | 0.02 | 0.08  | 0.03 |
| 4                 | 0.83 | 0.07 | 0.09 | 0.06 | 0     | 0    | 0.02  | 0.02 | 0.06  | 0.03 |
| 5                 | 0.85 | 0.06 | 0.08 | 0.06 | 0     | 0    | 0.02  | 0.02 | 0.05  | 0.03 |
| 6                 | 0.87 | 0.06 | 0.07 | 0.05 | 0     | 0    | 0.02  | 0.02 | 0.04  | 0.03 |
| 7                 | 0.88 | 0.06 | 0.07 | 0.05 | 0     | 0    | 0.01  | 0.01 | 0.04  | 0.03 |
| 8                 | 0.89 | 0.06 | 0.07 | 0.05 | 0     | 0    | 0.01  | 0.01 | 0.03  | 0.03 |
| 9                 | 0.88 | 0.06 | 0.07 | 0.06 | 0     | 0    | 0.01  | 0.01 | 0.04  | 0.03 |
| 10                | 0.9  | 0.06 | 0.06 | 0.05 | 0     | 0    | 0.01  | 0.01 | 0.03  | 0.03 |
| 11                | 0.9  | 0.06 | 0.06 | 0.05 | 0     | 0    | 0.01  | 0.01 | 0.03  | 0.03 |
| 12                | 0.91 | 0.06 | 0.05 | 0.05 | 0     | 0    | 0.01  | 0.01 | 0.03  | 0.03 |

**age=40 years, timing allo >6 months, cmv=others, donor=MRD, graft=BM, TBI=no TBI, In vivo Tcell depletion=yes,**

| Landmark time (y) | GRFS | se   | GF   | se   | AGVHD | se   | CGVHD | se   | Death | se   |
|-------------------|------|------|------|------|-------|------|-------|------|-------|------|
| 0                 | 0.62 | 0.07 | 0.19 | 0.06 | 0.02  | 0.01 | 0.03  | 0.02 | 0.15  | 0.04 |
| 1                 | 0.64 | 0.07 | 0.19 | 0.06 | 0.01  | 0.01 | 0.03  | 0.02 | 0.13  | 0.04 |
| 2                 | 0.68 | 0.07 | 0.15 | 0.07 | 0     | 0.01 | 0.04  | 0.02 | 0.13  | 0.05 |
| 3                 | 0.7  | 0.08 | 0.16 | 0.07 | 0     | 0    | 0.03  | 0.02 | 0.11  | 0.04 |
| 4                 | 0.78 | 0.07 | 0.1  | 0.06 | 0     | 0    | 0.03  | 0.02 | 0.08  | 0.04 |
| 5                 | 0.82 | 0.07 | 0.08 | 0.06 | 0     | 0    | 0.03  | 0.02 | 0.07  | 0.04 |
| 6                 | 0.84 | 0.07 | 0.07 | 0.06 | 0     | 0    | 0.02  | 0.02 | 0.06  | 0.04 |
| 7                 | 0.86 | 0.07 | 0.08 | 0.06 | 0     | 0    | 0.01  | 0.02 | 0.05  | 0.04 |
| 8                 | 0.86 | 0.07 | 0.08 | 0.06 | 0     | 0    | 0.01  | 0.02 | 0.05  | 0.04 |
| 9                 | 0.86 | 0.07 | 0.08 | 0.06 | 0     | 0    | 0.01  | 0.02 | 0.05  | 0.04 |
| 10                | 0.87 | 0.07 | 0.07 | 0.06 | 0     | 0    | 0.01  | 0.02 | 0.05  | 0.04 |
| 11                | 0.88 | 0.07 | 0.07 | 0.06 | 0     | 0    | 0.01  | 0.02 | 0.04  | 0.04 |
| 12                | 0.89 | 0.07 | 0.06 | 0.06 | 0     | 0    | 0.01  | 0.02 | 0.04  | 0.04 |

**age=50 years, timing allo >6 months, cmv=others, donor=MRD, graft=BM, TBI=no TBI, In vivo Tcell depletion=yes,**

| Landmark time (y) | GRFS | se   | GF   | se   | AGVHD | se   | CGVHD | se   | Death | se   |
|-------------------|------|------|------|------|-------|------|-------|------|-------|------|
| 0                 | 0.54 | 0.08 | 0.2  | 0.07 | 0.02  | 0.02 | 0.04  | 0.02 | 0.2   | 0.06 |
| 1                 | 0.57 | 0.08 | 0.2  | 0.07 | 0.02  | 0.02 | 0.04  | 0.03 | 0.17  | 0.06 |
| 2                 | 0.61 | 0.09 | 0.16 | 0.08 | 0     | 0.01 | 0.05  | 0.03 | 0.17  | 0.06 |
| 3                 | 0.63 | 0.09 | 0.17 | 0.08 | 0     | 0    | 0.05  | 0.03 | 0.15  | 0.06 |
| 4                 | 0.73 | 0.09 | 0.11 | 0.08 | 0     | 0    | 0.05  | 0.03 | 0.12  | 0.06 |
| 5                 | 0.77 | 0.09 | 0.09 | 0.07 | 0     | 0    | 0.05  | 0.04 | 0.09  | 0.06 |
| 6                 | 0.8  | 0.09 | 0.08 | 0.07 | 0     | 0    | 0.04  | 0.03 | 0.08  | 0.06 |
| 7                 | 0.82 | 0.09 | 0.08 | 0.07 | 0     | 0    | 0.02  | 0.03 | 0.08  | 0.06 |
| 8                 | 0.82 | 0.09 | 0.08 | 0.07 | 0     | 0    | 0.02  | 0.03 | 0.07  | 0.05 |
| 9                 | 0.82 | 0.09 | 0.09 | 0.08 | 0     | 0    | 0.02  | 0.03 | 0.07  | 0.06 |
| 10                | 0.84 | 0.09 | 0.08 | 0.07 | 0     | 0    | 0.02  | 0.03 | 0.07  | 0.05 |
| 11                | 0.85 | 0.09 | 0.08 | 0.07 | 0     | 0    | 0.02  | 0.03 | 0.06  | 0.05 |
| 12                | 0.86 | 0.09 | 0.06 | 0.07 | 0     | 0    | 0.02  | 0.03 | 0.06  | 0.05 |

**age=10 years, timing allo <6 months, cmv=others, donor=MRD, graft=BM, TBI=no TBI, In vivo Tcell depletion=yes,**

| Landmark time (y) | GRFS | se   | GF   | se   | AGVHD | se   | CGVHD | se   | Death | se   |
|-------------------|------|------|------|------|-------|------|-------|------|-------|------|
| 0                 | 0.78 | 0.06 | 0.13 | 0.06 | 0.01  | 0.01 | 0.03  | 0.02 | 0.05  | 0.02 |
| 1                 | 0.79 | 0.06 | 0.13 | 0.06 | 0.01  | 0.01 | 0.03  | 0.02 | 0.04  | 0.02 |
| 2                 | 0.82 | 0.06 | 0.11 | 0.06 | 0     | 0    | 0.03  | 0.02 | 0.04  | 0.02 |
| 3                 | 0.83 | 0.06 | 0.11 | 0.06 | 0     | 0    | 0.03  | 0.02 | 0.03  | 0.02 |
| 4                 | 0.88 | 0.06 | 0.07 | 0.05 | 0     | 0    | 0.02  | 0.02 | 0.02  | 0.02 |
| 5                 | 0.9  | 0.05 | 0.06 | 0.05 | 0     | 0    | 0.03  | 0.02 | 0.02  | 0.02 |
| 6                 | 0.92 | 0.05 | 0.05 | 0.05 | 0     | 0    | 0.02  | 0.02 | 0.02  | 0.02 |
| 7                 | 0.92 | 0.05 | 0.05 | 0.05 | 0     | 0    | 0.01  | 0.01 | 0.02  | 0.02 |
| 8                 | 0.92 | 0.05 | 0.05 | 0.05 | 0     | 0    | 0.01  | 0.01 | 0.01  | 0.01 |



|    |      |      |      |      |   |   |      |      |      |      |
|----|------|------|------|------|---|---|------|------|------|------|
| 9  | 0.92 | 0.05 | 0.05 | 0.05 | 0 | 0 | 0.01 | 0.01 | 0.01 | 0.02 |
| 10 | 0.93 | 0.05 | 0.04 | 0.05 | 0 | 0 | 0.01 | 0.01 | 0.01 | 0.01 |
| 11 | 0.93 | 0.05 | 0.04 | 0.05 | 0 | 0 | 0.01 | 0.01 | 0.01 | 0.01 |
| 12 | 0.94 | 0.05 | 0.04 | 0.04 | 0 | 0 | 0.01 | 0.01 | 0.01 | 0.01 |

**age=20 years, timing allo <6 months, cmv=others, donor=MRD, graft=BM, TBI=no TBI, In vivo Tcell depletion=yes,**

| Landmark time (y) | GRFS | se   | GF   | se   | AGVHD | se   | CGVHD | se   | Death | se   |
|-------------------|------|------|------|------|-------|------|-------|------|-------|------|
| 0                 | 0.74 | 0.06 | 0.15 | 0.06 | 0.01  | 0.01 | 0.04  | 0.02 | 0.06  | 0.02 |
| 1                 | 0.75 | 0.06 | 0.14 | 0.06 | 0.01  | 0.01 | 0.04  | 0.02 | 0.06  | 0.02 |
| 2                 | 0.78 | 0.06 | 0.12 | 0.06 | 0     | 0.01 | 0.04  | 0.02 | 0.05  | 0.03 |
| 3                 | 0.79 | 0.06 | 0.12 | 0.06 | 0     | 0    | 0.04  | 0.02 | 0.05  | 0.02 |
| 4                 | 0.85 | 0.06 | 0.08 | 0.05 | 0     | 0    | 0.04  | 0.02 | 0.04  | 0.02 |
| 5                 | 0.87 | 0.06 | 0.06 | 0.05 | 0     | 0    | 0.04  | 0.02 | 0.03  | 0.02 |
| 6                 | 0.89 | 0.06 | 0.06 | 0.05 | 0     | 0    | 0.03  | 0.02 | 0.02  | 0.02 |
| 7                 | 0.91 | 0.05 | 0.06 | 0.05 | 0     | 0    | 0.02  | 0.02 | 0.02  | 0.02 |
| 8                 | 0.91 | 0.05 | 0.06 | 0.05 | 0     | 0    | 0.02  | 0.02 | 0.02  | 0.02 |
| 9                 | 0.9  | 0.06 | 0.06 | 0.05 | 0     | 0    | 0.02  | 0.02 | 0.02  | 0.02 |
| 10                | 0.92 | 0.05 | 0.05 | 0.05 | 0     | 0    | 0.01  | 0.02 | 0.02  | 0.02 |
| 11                | 0.92 | 0.05 | 0.05 | 0.05 | 0     | 0    | 0.01  | 0.02 | 0.02  | 0.02 |
| 12                | 0.93 | 0.05 | 0.04 | 0.04 | 0     | 0    | 0.01  | 0.02 | 0.02  | 0.02 |

**age=30 years, timing allo <6 months, cmv=others, donor=MRD, graft=BM, TBI=no TBI, In vivo Tcell depletion=yes,**

| Landmark time (y) | GRFS | se   | GF   | se   | AGVHD | se   | CGVHD | se   | Death | se   |
|-------------------|------|------|------|------|-------|------|-------|------|-------|------|
| 0                 | 0.68 | 0.07 | 0.16 | 0.06 | 0.02  | 0.01 | 0.05  | 0.03 | 0.09  | 0.03 |
| 1                 | 0.7  | 0.07 | 0.16 | 0.06 | 0.02  | 0.01 | 0.05  | 0.03 | 0.08  | 0.03 |
| 2                 | 0.73 | 0.07 | 0.13 | 0.06 | 0     | 0.01 | 0.06  | 0.03 | 0.08  | 0.03 |
| 3                 | 0.75 | 0.07 | 0.13 | 0.07 | 0     | 0    | 0.06  | 0.03 | 0.07  | 0.03 |
| 4                 | 0.81 | 0.07 | 0.09 | 0.06 | 0     | 0    | 0.05  | 0.03 | 0.05  | 0.03 |
| 5                 | 0.84 | 0.07 | 0.07 | 0.06 | 0     | 0    | 0.05  | 0.03 | 0.04  | 0.03 |
| 6                 | 0.87 | 0.07 | 0.06 | 0.06 | 0     | 0    | 0.04  | 0.03 | 0.04  | 0.03 |
| 7                 | 0.88 | 0.07 | 0.06 | 0.06 | 0     | 0    | 0.02  | 0.03 | 0.03  | 0.03 |
| 8                 | 0.88 | 0.07 | 0.06 | 0.06 | 0     | 0    | 0.02  | 0.03 | 0.03  | 0.03 |
| 9                 | 0.88 | 0.07 | 0.07 | 0.06 | 0     | 0    | 0.02  | 0.03 | 0.03  | 0.03 |
| 10                | 0.9  | 0.06 | 0.06 | 0.06 | 0     | 0    | 0.02  | 0.02 | 0.03  | 0.03 |
| 11                | 0.9  | 0.06 | 0.06 | 0.06 | 0     | 0    | 0.02  | 0.02 | 0.02  | 0.03 |
| 12                | 0.91 | 0.06 | 0.05 | 0.05 | 0     | 0    | 0.02  | 0.02 | 0.03  | 0.03 |

**age=40 years, timing allo <6 months, cmv=others, donor=MRD, graft=BM, TBI=no TBI, In vivo Tcell depletion=yes,**

| Landmark time (y) | GRFS | se   | GF   | se   | AGVHD | se   | CGVHD | se   | Death | se   |
|-------------------|------|------|------|------|-------|------|-------|------|-------|------|
| 0                 | 0.61 | 0.08 | 0.17 | 0.07 | 0.03  | 0.02 | 0.07  | 0.04 | 0.13  | 0.04 |
| 1                 | 0.63 | 0.09 | 0.17 | 0.07 | 0.02  | 0.02 | 0.07  | 0.04 | 0.11  | 0.04 |
| 2                 | 0.67 | 0.09 | 0.14 | 0.08 | 0     | 0.01 | 0.08  | 0.05 | 0.11  | 0.05 |
| 3                 | 0.69 | 0.09 | 0.14 | 0.08 | 0     | 0    | 0.08  | 0.05 | 0.09  | 0.05 |
| 4                 | 0.76 | 0.09 | 0.09 | 0.07 | 0     | 0    | 0.07  | 0.05 | 0.07  | 0.05 |

|    |      |      |      |      |   |   |      |      |      |      |
|----|------|------|------|------|---|---|------|------|------|------|
| 5  | 0.79 | 0.09 | 0.08 | 0.07 | 0 | 0 | 0.08 | 0.05 | 0.06 | 0.04 |
| 6  | 0.83 | 0.09 | 0.07 | 0.07 | 0 | 0 | 0.06 | 0.05 | 0.05 | 0.04 |
| 7  | 0.85 | 0.09 | 0.07 | 0.07 | 0 | 0 | 0.03 | 0.04 | 0.05 | 0.04 |
| 8  | 0.85 | 0.09 | 0.07 | 0.07 | 0 | 0 | 0.03 | 0.04 | 0.04 | 0.04 |
| 9  | 0.85 | 0.09 | 0.07 | 0.07 | 0 | 0 | 0.03 | 0.04 | 0.04 | 0.04 |
| 10 | 0.87 | 0.08 | 0.06 | 0.07 | 0 | 0 | 0.03 | 0.04 | 0.04 | 0.04 |
| 11 | 0.88 | 0.08 | 0.06 | 0.07 | 0 | 0 | 0.03 | 0.04 | 0.04 | 0.04 |
| 12 | 0.89 | 0.08 | 0.05 | 0.07 | 0 | 0 | 0.03 | 0.04 | 0.04 | 0.04 |

**age=50 years, timing allo <6 months, cmv=others, donor=MRD, graft=BM, TBI=no TBI, In vivo Tcell depletion=yes,**

| Landmark time (y) | GRFS | se   | GF   | se   | AGVHD | se   | CGVHD | se   | Death | se   |
|-------------------|------|------|------|------|-------|------|-------|------|-------|------|
| 0                 | 0.52 | 0.1  | 0.18 | 0.09 | 0.04  | 0.03 | 0.09  | 0.06 | 0.17  | 0.06 |
| 1                 | 0.54 | 0.11 | 0.18 | 0.09 | 0.03  | 0.03 | 0.1   | 0.06 | 0.15  | 0.06 |
| 2                 | 0.59 | 0.11 | 0.15 | 0.09 | 0.01  | 0.02 | 0.11  | 0.07 | 0.15  | 0.07 |
| 3                 | 0.61 | 0.12 | 0.15 | 0.1  | 0     | 0    | 0.11  | 0.07 | 0.13  | 0.07 |
| 4                 | 0.7  | 0.12 | 0.1  | 0.09 | 0     | 0    | 0.1   | 0.08 | 0.1   | 0.07 |
| 5                 | 0.73 | 0.12 | 0.08 | 0.09 | 0     | 0    | 0.11  | 0.08 | 0.08  | 0.06 |
| 6                 | 0.78 | 0.12 | 0.07 | 0.09 | 0     | 0    | 0.08  | 0.08 | 0.07  | 0.06 |
| 7                 | 0.81 | 0.12 | 0.08 | 0.09 | 0     | 0    | 0.05  | 0.07 | 0.07  | 0.06 |
| 8                 | 0.81 | 0.12 | 0.08 | 0.09 | 0     | 0    | 0.05  | 0.07 | 0.06  | 0.06 |
| 9                 | 0.81 | 0.12 | 0.08 | 0.09 | 0     | 0    | 0.05  | 0.07 | 0.06  | 0.06 |
| 10                | 0.84 | 0.12 | 0.07 | 0.09 | 0     | 0    | 0.04  | 0.06 | 0.06  | 0.06 |
| 11                | 0.84 | 0.12 | 0.07 | 0.09 | 0     | 0    | 0.04  | 0.06 | 0.05  | 0.06 |
| 12                | 0.85 | 0.11 | 0.06 | 0.08 | 0     | 0    | 0.04  | 0.06 | 0.05  | 0.06 |

**age=10 years, timing allo >6 months, cmv=D-/R-, donor=UD, graft=BM, TBI=no TBI, In vivo Tcell depletion=yes,**

| Landmark time (y) | GRFS | se   | GF   | se   | AGVHD | se   | CGVHD | se   | Death | se   |
|-------------------|------|------|------|------|-------|------|-------|------|-------|------|
| 0                 | 0.81 | 0.05 | 0.03 | 0.02 | 0.02  | 0.02 | 0.02  | 0.01 | 0.12  | 0.05 |
| 1                 | 0.83 | 0.05 | 0.03 | 0.02 | 0.02  | 0.02 | 0.02  | 0.01 | 0.11  | 0.05 |
| 2                 | 0.86 | 0.05 | 0.02 | 0.02 | 0     | 0.01 | 0.02  | 0.01 | 0.1   | 0.05 |
| 3                 | 0.87 | 0.05 | 0.02 | 0.02 | 0     | 0    | 0.02  | 0.02 | 0.09  | 0.05 |
| 4                 | 0.91 | 0.05 | 0.01 | 0.02 | 0     | 0    | 0.01  | 0.02 | 0.07  | 0.04 |
| 5                 | 0.92 | 0.05 | 0.01 | 0.02 | 0     | 0    | 0.01  | 0.02 | 0.05  | 0.04 |
| 6                 | 0.93 | 0.04 | 0.01 | 0.02 | 0     | 0    | 0.01  | 0.01 | 0.05  | 0.04 |
| 7                 | 0.94 | 0.04 | 0.01 | 0.02 | 0     | 0    | 0.01  | 0.01 | 0.04  | 0.04 |
| 8                 | 0.94 | 0.04 | 0.01 | 0.02 | 0     | 0    | 0.01  | 0.01 | 0.04  | 0.04 |
| 9                 | 0.94 | 0.04 | 0.01 | 0.02 | 0     | 0    | 0.01  | 0.01 | 0.04  | 0.04 |
| 10                | 0.95 | 0.04 | 0.01 | 0.02 | 0     | 0    | 0.01  | 0.01 | 0.04  | 0.04 |
| 11                | 0.95 | 0.04 | 0.01 | 0.02 | 0     | 0    | 0.01  | 0.01 | 0.03  | 0.03 |
| 12                | 0.95 | 0.04 | 0.01 | 0.02 | 0     | 0    | 0.01  | 0.01 | 0.03  | 0.04 |

**age=20 years, timing allo >6 months, cmv=D-/R-, donor=UD, graft=BM, TBI=no TBI, In vivo Tcell depletion=yes,**

| Landmark time (y) | GRFS | se   | GF   | se   | AGVHD | se   | CGVHD | se   | Death | se   |
|-------------------|------|------|------|------|-------|------|-------|------|-------|------|
| 0                 | 0.75 | 0.06 | 0.03 | 0.02 | 0.03  | 0.02 | 0.02  | 0.02 | 0.17  | 0.06 |

|    |      |      |      |      |      |      |      |      |      |      |
|----|------|------|------|------|------|------|------|------|------|------|
| 1  | 0.78 | 0.06 | 0.03 | 0.02 | 0.03 | 0.02 | 0.02 | 0.02 | 0.15 | 0.06 |
| 2  | 0.8  | 0.07 | 0.02 | 0.02 | 0    | 0.01 | 0.02 | 0.02 | 0.14 | 0.06 |
| 3  | 0.83 | 0.06 | 0.02 | 0.02 | 0    | 0    | 0.02 | 0.02 | 0.13 | 0.06 |
| 4  | 0.87 | 0.06 | 0.02 | 0.02 | 0    | 0    | 0.02 | 0.02 | 0.09 | 0.06 |
| 5  | 0.89 | 0.06 | 0.01 | 0.02 | 0    | 0    | 0.02 | 0.02 | 0.07 | 0.05 |
| 6  | 0.91 | 0.06 | 0.01 | 0.02 | 0    | 0    | 0.02 | 0.02 | 0.07 | 0.05 |
| 7  | 0.92 | 0.05 | 0.01 | 0.02 | 0    | 0    | 0.01 | 0.02 | 0.06 | 0.05 |
| 8  | 0.92 | 0.05 | 0.01 | 0.02 | 0    | 0    | 0.01 | 0.02 | 0.06 | 0.05 |
| 9  | 0.92 | 0.05 | 0.01 | 0.02 | 0    | 0    | 0.01 | 0.02 | 0.06 | 0.05 |
| 10 | 0.93 | 0.05 | 0.01 | 0.02 | 0    | 0    | 0.01 | 0.01 | 0.05 | 0.05 |
| 11 | 0.94 | 0.05 | 0.01 | 0.02 | 0    | 0    | 0.01 | 0.01 | 0.05 | 0.04 |
| 12 | 0.94 | 0.05 | 0.01 | 0.02 | 0    | 0    | 0.01 | 0.01 | 0.05 | 0.05 |

**age=30 years, timing allo >6 months, cmv=D-/R-, donor=UD, graft=BM, TBI=no TBI, In vivo Tcell depletion=yes,**

| Landmark time (y) | GRFS | se   | GF   | se   | AGVHD | se   | CGVHD | se   | Death | se   |
|-------------------|------|------|------|------|-------|------|-------|------|-------|------|
| 0                 | 0.67 | 0.08 | 0.03 | 0.02 | 0.04  | 0.03 | 0.03  | 0.02 | 0.23  | 0.07 |
| 1                 | 0.7  | 0.08 | 0.03 | 0.02 | 0.04  | 0.03 | 0.03  | 0.02 | 0.2   | 0.07 |
| 2                 | 0.73 | 0.08 | 0.03 | 0.02 | 0.01  | 0.02 | 0.03  | 0.03 | 0.2   | 0.08 |
| 3                 | 0.76 | 0.08 | 0.03 | 0.03 | 0     | 0    | 0.03  | 0.03 | 0.18  | 0.08 |
| 4                 | 0.82 | 0.08 | 0.02 | 0.02 | 0     | 0    | 0.03  | 0.03 | 0.13  | 0.08 |
| 5                 | 0.85 | 0.08 | 0.01 | 0.02 | 0     | 0    | 0.03  | 0.03 | 0.11  | 0.07 |
| 6                 | 0.87 | 0.08 | 0.01 | 0.02 | 0     | 0    | 0.02  | 0.03 | 0.09  | 0.07 |
| 7                 | 0.89 | 0.07 | 0.01 | 0.02 | 0     | 0    | 0.01  | 0.02 | 0.09  | 0.07 |
| 8                 | 0.89 | 0.07 | 0.01 | 0.02 | 0     | 0    | 0.01  | 0.02 | 0.08  | 0.07 |
| 9                 | 0.89 | 0.07 | 0.01 | 0.02 | 0     | 0    | 0.01  | 0.02 | 0.08  | 0.07 |
| 10                | 0.9  | 0.07 | 0.01 | 0.02 | 0     | 0    | 0.01  | 0.02 | 0.07  | 0.07 |
| 11                | 0.91 | 0.07 | 0.01 | 0.02 | 0     | 0    | 0.01  | 0.02 | 0.07  | 0.06 |
| 12                | 0.91 | 0.07 | 0.01 | 0.02 | 0     | 0    | 0.01  | 0.02 | 0.07  | 0.06 |

**age=40 years, timing allo >6 months, cmv=D-/R-, donor=UD, graft=BM, TBI=no TBI, In vivo Tcell depletion=yes,**

| Landmark time (y) | GRFS | se   | GF   | se   | AGVHD | se   | CGVHD | se   | Death | se   |
|-------------------|------|------|------|------|-------|------|-------|------|-------|------|
| 0                 | 0.56 | 0.1  | 0.03 | 0.02 | 0.06  | 0.04 | 0.04  | 0.03 | 0.31  | 0.09 |
| 1                 | 0.6  | 0.1  | 0.03 | 0.03 | 0.05  | 0.05 | 0.04  | 0.03 | 0.28  | 0.1  |
| 2                 | 0.64 | 0.11 | 0.03 | 0.03 | 0.01  | 0.03 | 0.05  | 0.04 | 0.27  | 0.11 |
| 3                 | 0.68 | 0.11 | 0.03 | 0.03 | 0     | 0    | 0.05  | 0.04 | 0.24  | 0.11 |
| 4                 | 0.75 | 0.11 | 0.02 | 0.03 | 0     | 0    | 0.04  | 0.04 | 0.18  | 0.11 |
| 5                 | 0.79 | 0.11 | 0.02 | 0.02 | 0     | 0    | 0.04  | 0.04 | 0.15  | 0.1  |
| 6                 | 0.82 | 0.11 | 0.01 | 0.02 | 0     | 0    | 0.03  | 0.04 | 0.13  | 0.1  |
| 7                 | 0.84 | 0.1  | 0.01 | 0.02 | 0     | 0    | 0.02  | 0.03 | 0.12  | 0.1  |
| 8                 | 0.85 | 0.1  | 0.01 | 0.03 | 0     | 0    | 0.02  | 0.03 | 0.11  | 0.1  |
| 9                 | 0.85 | 0.1  | 0.02 | 0.03 | 0     | 0    | 0.02  | 0.03 | 0.12  | 0.1  |
| 10                | 0.87 | 0.1  | 0.01 | 0.02 | 0     | 0    | 0.02  | 0.03 | 0.1   | 0.1  |
| 11                | 0.88 | 0.1  | 0.01 | 0.03 | 0     | 0    | 0.02  | 0.03 | 0.09  | 0.09 |
| 12                | 0.88 | 0.1  | 0.01 | 0.02 | 0     | 0    | 0.02  | 0.03 | 0.1   | 0.09 |

**age=50 years, timing allo >6 months, cmv=D-/R-, donor=UD, graft=BM, TBI=no TBI, In vivo Tcell depletion=yes,**

| Landmark time (y) | GRFS | se   | GF   | se   | AGVHD | se   | CGVHD | se   | Death | se   |
|-------------------|------|------|------|------|-------|------|-------|------|-------|------|
| 0                 | 0.44 | 0.12 | 0.03 | 0.02 | 0.08  | 0.06 | 0.05  | 0.04 | 0.4   | 0.12 |
| 1                 | 0.49 | 0.13 | 0.03 | 0.03 | 0.07  | 0.07 | 0.05  | 0.04 | 0.36  | 0.13 |
| 2                 | 0.53 | 0.14 | 0.03 | 0.03 | 0.01  | 0.04 | 0.06  | 0.05 | 0.37  | 0.14 |
| 3                 | 0.58 | 0.15 | 0.03 | 0.03 | 0     | 0    | 0.06  | 0.05 | 0.33  | 0.15 |
| 4                 | 0.67 | 0.16 | 0.02 | 0.03 | 0     | 0    | 0.06  | 0.06 | 0.25  | 0.15 |
| 5                 | 0.71 | 0.15 | 0.02 | 0.03 | 0     | 0    | 0.06  | 0.06 | 0.21  | 0.15 |
| 6                 | 0.76 | 0.15 | 0.02 | 0.03 | 0     | 0    | 0.05  | 0.06 | 0.18  | 0.15 |
| 7                 | 0.78 | 0.15 | 0.02 | 0.03 | 0     | 0    | 0.03  | 0.05 | 0.17  | 0.15 |
| 8                 | 0.8  | 0.15 | 0.02 | 0.03 | 0     | 0    | 0.03  | 0.05 | 0.16  | 0.14 |
| 9                 | 0.79 | 0.15 | 0.02 | 0.03 | 0     | 0    | 0.03  | 0.05 | 0.16  | 0.15 |
| 10                | 0.82 | 0.15 | 0.01 | 0.03 | 0     | 0    | 0.02  | 0.05 | 0.15  | 0.14 |
| 11                | 0.83 | 0.15 | 0.01 | 0.03 | 0     | 0    | 0.02  | 0.05 | 0.13  | 0.14 |
| 12                | 0.83 | 0.15 | 0.01 | 0.03 | 0     | 0    | 0.02  | 0.05 | 0.14  | 0.14 |

**age=10 years, timing allo <6 months, cmv=D-/R-, donor=UD, graft=BM, TBI=no TBI, In vivo Tcell depletion=yes,**

| Landmark time (y) | GRFS | se   | GF   | se   | AGVHD | se   | CGVHD | se   | Death | se   |
|-------------------|------|------|------|------|-------|------|-------|------|-------|------|
| 0                 | 0.79 | 0.06 | 0.03 | 0.02 | 0.04  | 0.04 | 0.03  | 0.03 | 0.1   | 0.04 |
| 1                 | 0.82 | 0.06 | 0.03 | 0.02 | 0.03  | 0.04 | 0.03  | 0.03 | 0.09  | 0.04 |
| 2                 | 0.85 | 0.06 | 0.02 | 0.02 | 0.01  | 0.02 | 0.04  | 0.03 | 0.09  | 0.05 |
| 3                 | 0.86 | 0.06 | 0.02 | 0.02 | 0     | 0    | 0.04  | 0.03 | 0.08  | 0.05 |
| 4                 | 0.9  | 0.06 | 0.01 | 0.02 | 0     | 0    | 0.03  | 0.03 | 0.06  | 0.04 |
| 5                 | 0.91 | 0.05 | 0.01 | 0.02 | 0     | 0    | 0.03  | 0.03 | 0.04  | 0.04 |
| 6                 | 0.93 | 0.05 | 0.01 | 0.02 | 0     | 0    | 0.02  | 0.03 | 0.04  | 0.04 |
| 7                 | 0.94 | 0.05 | 0.01 | 0.02 | 0     | 0    | 0.01  | 0.03 | 0.04  | 0.04 |
| 8                 | 0.94 | 0.05 | 0.01 | 0.02 | 0     | 0    | 0.01  | 0.03 | 0.03  | 0.04 |
| 9                 | 0.94 | 0.05 | 0.01 | 0.02 | 0     | 0    | 0.01  | 0.03 | 0.03  | 0.04 |
| 10                | 0.95 | 0.05 | 0.01 | 0.02 | 0     | 0    | 0.01  | 0.02 | 0.03  | 0.04 |
| 11                | 0.95 | 0.04 | 0.01 | 0.02 | 0     | 0    | 0.01  | 0.02 | 0.03  | 0.03 |
| 12                | 0.95 | 0.04 | 0.01 | 0.02 | 0     | 0    | 0.01  | 0.02 | 0.03  | 0.04 |

**age=20 years, timing allo <6 months, cmv=D-/R-, donor=UD, graft=BM, TBI=no TBI, In vivo Tcell depletion=yes,**

| Landmark time (y) | GRFS | se   | GF   | se   | AGVHD | se   | CGVHD | se   | Death | se   |
|-------------------|------|------|------|------|-------|------|-------|------|-------|------|
| 0                 | 0.72 | 0.08 | 0.03 | 0.02 | 0.06  | 0.05 | 0.05  | 0.04 | 0.14  | 0.06 |
| 1                 | 0.75 | 0.08 | 0.03 | 0.02 | 0.05  | 0.05 | 0.05  | 0.04 | 0.13  | 0.06 |
| 2                 | 0.79 | 0.08 | 0.02 | 0.02 | 0.01  | 0.03 | 0.06  | 0.04 | 0.12  | 0.06 |
| 3                 | 0.81 | 0.08 | 0.02 | 0.02 | 0     | 0    | 0.05  | 0.04 | 0.11  | 0.06 |
| 4                 | 0.86 | 0.07 | 0.01 | 0.02 | 0     | 0    | 0.05  | 0.04 | 0.08  | 0.06 |
| 5                 | 0.88 | 0.07 | 0.01 | 0.02 | 0     | 0    | 0.05  | 0.04 | 0.06  | 0.06 |
| 6                 | 0.9  | 0.07 | 0.01 | 0.02 | 0     | 0    | 0.04  | 0.04 | 0.06  | 0.05 |
| 7                 | 0.92 | 0.06 | 0.01 | 0.02 | 0     | 0    | 0.02  | 0.04 | 0.05  | 0.05 |
| 8                 | 0.92 | 0.06 | 0.01 | 0.02 | 0     | 0    | 0.02  | 0.04 | 0.05  | 0.05 |

|    |      |      |      |      |   |   |      |      |      |      |
|----|------|------|------|------|---|---|------|------|------|------|
| 9  | 0.92 | 0.07 | 0.01 | 0.02 | 0 | 0 | 0.02 | 0.04 | 0.05 | 0.05 |
| 10 | 0.93 | 0.06 | 0.01 | 0.02 | 0 | 0 | 0.02 | 0.03 | 0.04 | 0.05 |
| 11 | 0.93 | 0.06 | 0.01 | 0.02 | 0 | 0 | 0.02 | 0.03 | 0.04 | 0.05 |
| 12 | 0.93 | 0.06 | 0.01 | 0.02 | 0 | 0 | 0.02 | 0.03 | 0.04 | 0.05 |

**age=30 years, timing allo <6 months, cmv=D-/R-, donor=UD, graft=BM, TBI=no TBI, In vivo Tcell depletion=yes,**

| Landmark time (y) | GRFS | se   | GF   | se   | AGVHD | se   | CGVHD | se   | Death | se   |
|-------------------|------|------|------|------|-------|------|-------|------|-------|------|
| 0                 | 0.63 | 0.1  | 0.03 | 0.02 | 0.08  | 0.07 | 0.06  | 0.05 | 0.19  | 0.08 |
| 1                 | 0.67 | 0.11 | 0.03 | 0.02 | 0.07  | 0.07 | 0.07  | 0.05 | 0.17  | 0.08 |
| 2                 | 0.71 | 0.11 | 0.02 | 0.03 | 0.01  | 0.04 | 0.08  | 0.06 | 0.17  | 0.09 |
| 3                 | 0.75 | 0.1  | 0.02 | 0.03 | 0     | 0    | 0.08  | 0.06 | 0.15  | 0.09 |
| 4                 | 0.8  | 0.1  | 0.02 | 0.02 | 0     | 0    | 0.07  | 0.06 | 0.11  | 0.09 |
| 5                 | 0.83 | 0.1  | 0.01 | 0.02 | 0     | 0    | 0.07  | 0.07 | 0.09  | 0.08 |
| 6                 | 0.86 | 0.1  | 0.01 | 0.02 | 0     | 0    | 0.05  | 0.06 | 0.08  | 0.08 |
| 7                 | 0.88 | 0.09 | 0.01 | 0.02 | 0     | 0    | 0.03  | 0.05 | 0.07  | 0.08 |
| 8                 | 0.89 | 0.09 | 0.01 | 0.02 | 0     | 0    | 0.03  | 0.05 | 0.07  | 0.07 |
| 9                 | 0.89 | 0.09 | 0.01 | 0.02 | 0     | 0    | 0.03  | 0.05 | 0.07  | 0.08 |
| 10                | 0.9  | 0.09 | 0.01 | 0.02 | 0     | 0    | 0.02  | 0.05 | 0.06  | 0.07 |
| 11                | 0.91 | 0.09 | 0.01 | 0.02 | 0     | 0    | 0.02  | 0.05 | 0.06  | 0.07 |
| 12                | 0.91 | 0.09 | 0.01 | 0.02 | 0     | 0    | 0.02  | 0.05 | 0.06  | 0.07 |

**age=40 years, timing allo <6 months, cmv=D-/R-, donor=UD, graft=BM, TBI=no TBI, In vivo Tcell depletion=yes,**

| Landmark time (y) | GRFS | se   | GF   | se   | AGVHD | se   | CGVHD | se   | Death | se   |
|-------------------|------|------|------|------|-------|------|-------|------|-------|------|
| 0                 | 0.52 | 0.13 | 0.03 | 0.02 | 0.11  | 0.1  | 0.08  | 0.06 | 0.26  | 0.11 |
| 1                 | 0.56 | 0.14 | 0.03 | 0.03 | 0.09  | 0.1  | 0.09  | 0.07 | 0.23  | 0.11 |
| 2                 | 0.62 | 0.14 | 0.02 | 0.03 | 0.02  | 0.06 | 0.11  | 0.08 | 0.23  | 0.12 |
| 3                 | 0.66 | 0.14 | 0.03 | 0.03 | 0     | 0    | 0.11  | 0.09 | 0.21  | 0.13 |
| 4                 | 0.73 | 0.15 | 0.02 | 0.03 | 0     | 0    | 0.1   | 0.09 | 0.16  | 0.12 |
| 5                 | 0.76 | 0.14 | 0.01 | 0.03 | 0     | 0    | 0.1   | 0.1  | 0.13  | 0.12 |
| 6                 | 0.8  | 0.14 | 0.01 | 0.03 | 0     | 0    | 0.07  | 0.09 | 0.11  | 0.11 |
| 7                 | 0.84 | 0.14 | 0.01 | 0.03 | 0     | 0    | 0.04  | 0.08 | 0.11  | 0.11 |
| 8                 | 0.85 | 0.13 | 0.01 | 0.03 | 0     | 0    | 0.05  | 0.08 | 0.1   | 0.11 |
| 9                 | 0.84 | 0.14 | 0.01 | 0.03 | 0     | 0    | 0.05  | 0.08 | 0.1   | 0.11 |
| 10                | 0.86 | 0.13 | 0.01 | 0.03 | 0     | 0    | 0.04  | 0.07 | 0.09  | 0.11 |
| 11                | 0.87 | 0.13 | 0.01 | 0.03 | 0     | 0    | 0.04  | 0.07 | 0.08  | 0.11 |
| 12                | 0.87 | 0.13 | 0.01 | 0.02 | 0     | 0    | 0.04  | 0.07 | 0.08  | 0.11 |

**age=50 years, timing allo <6 months, cmv=D-/R-, donor=UD, graft=BM, TBI=no TBI, In vivo Tcell depletion=yes,**

| Landmark time (y) | GRFS | se   | GF   | se   | AGVHD | se   | CGVHD | se   | Death | se   |
|-------------------|------|------|------|------|-------|------|-------|------|-------|------|
| 0                 | 0.39 | 0.15 | 0.03 | 0.03 | 0.15  | 0.14 | 0.1   | 0.08 | 0.33  | 0.14 |
| 1                 | 0.44 | 0.17 | 0.03 | 0.03 | 0.12  | 0.15 | 0.11  | 0.09 | 0.29  | 0.15 |
| 2                 | 0.5  | 0.18 | 0.03 | 0.03 | 0.02  | 0.09 | 0.14  | 0.12 | 0.31  | 0.17 |
| 3                 | 0.55 | 0.19 | 0.03 | 0.03 | 0     | 0    | 0.14  | 0.12 | 0.28  | 0.17 |
| 4                 | 0.63 | 0.2  | 0.02 | 0.03 | 0     | 0    | 0.13  | 0.14 | 0.21  | 0.18 |

|    |      |      |      |      |   |   |      |      |      |      |
|----|------|------|------|------|---|---|------|------|------|------|
| 5  | 0.67 | 0.2  | 0.01 | 0.03 | 0 | 0 | 0.14 | 0.15 | 0.17 | 0.17 |
| 6  | 0.73 | 0.2  | 0.01 | 0.03 | 0 | 0 | 0.11 | 0.14 | 0.15 | 0.17 |
| 7  | 0.77 | 0.2  | 0.01 | 0.03 | 0 | 0 | 0.06 | 0.12 | 0.15 | 0.17 |
| 8  | 0.79 | 0.2  | 0.01 | 0.03 | 0 | 0 | 0.06 | 0.12 | 0.14 | 0.17 |
| 9  | 0.78 | 0.2  | 0.01 | 0.03 | 0 | 0 | 0.07 | 0.13 | 0.14 | 0.17 |
| 10 | 0.81 | 0.2  | 0.01 | 0.03 | 0 | 0 | 0.05 | 0.11 | 0.13 | 0.17 |
| 11 | 0.82 | 0.19 | 0.01 | 0.03 | 0 | 0 | 0.05 | 0.12 | 0.11 | 0.16 |
| 12 | 0.82 | 0.2  | 0.01 | 0.03 | 0 | 0 | 0.05 | 0.12 | 0.12 | 0.17 |

**age=10 years, timing allo >6 months, cmv=others, donor=UD, graft=BM, TBI=no TBI, In vivo Tcell depletion=yes,**

| Landmark time (y) | GRFS | se   | GF   | se   | AGVHD | se   | CGVHD | se   | Death | se   |
|-------------------|------|------|------|------|-------|------|-------|------|-------|------|
| 0                 | 0.73 | 0.06 | 0.12 | 0.05 | 0.04  | 0.03 | 0.01  | 0.01 | 0.1   | 0.04 |
| 1                 | 0.75 | 0.07 | 0.12 | 0.05 | 0.03  | 0.03 | 0.01  | 0.01 | 0.08  | 0.04 |
| 2                 | 0.8  | 0.06 | 0.1  | 0.05 | 0.01  | 0.02 | 0.01  | 0.01 | 0.08  | 0.04 |
| 3                 | 0.82 | 0.06 | 0.1  | 0.05 | 0     | 0    | 0.01  | 0.01 | 0.07  | 0.04 |
| 4                 | 0.87 | 0.06 | 0.06 | 0.05 | 0     | 0    | 0.01  | 0.01 | 0.05  | 0.04 |
| 5                 | 0.89 | 0.06 | 0.05 | 0.05 | 0     | 0    | 0.01  | 0.01 | 0.04  | 0.03 |
| 6                 | 0.91 | 0.05 | 0.05 | 0.04 | 0     | 0    | 0.01  | 0.01 | 0.04  | 0.03 |
| 7                 | 0.91 | 0.05 | 0.05 | 0.04 | 0     | 0    | 0.01  | 0.01 | 0.03  | 0.03 |
| 8                 | 0.92 | 0.05 | 0.05 | 0.04 | 0     | 0    | 0.01  | 0.01 | 0.03  | 0.03 |
| 9                 | 0.91 | 0.06 | 0.05 | 0.05 | 0     | 0    | 0.01  | 0.01 | 0.03  | 0.03 |
| 10                | 0.93 | 0.05 | 0.04 | 0.04 | 0     | 0    | 0     | 0.01 | 0.03  | 0.03 |
| 11                | 0.93 | 0.05 | 0.04 | 0.04 | 0     | 0    | 0     | 0.01 | 0.03  | 0.03 |
| 12                | 0.93 | 0.05 | 0.03 | 0.04 | 0     | 0    | 0     | 0.01 | 0.03  | 0.03 |

**age=20 years, timing allo >6 months, cmv=others, donor=UD, graft=BM, TBI=no TBI, In vivo Tcell depletion=yes,**

| Landmark time (y) | GRFS | se   | GF   | se   | AGVHD | se   | CGVHD | se   | Death | se   |
|-------------------|------|------|------|------|-------|------|-------|------|-------|------|
| 0                 | 0.67 | 0.07 | 0.13 | 0.05 | 0.06  | 0.03 | 0.02  | 0.01 | 0.13  | 0.04 |
| 1                 | 0.69 | 0.07 | 0.13 | 0.05 | 0.05  | 0.03 | 0.02  | 0.01 | 0.12  | 0.04 |
| 2                 | 0.75 | 0.07 | 0.1  | 0.05 | 0.01  | 0.02 | 0.02  | 0.01 | 0.12  | 0.05 |
| 3                 | 0.77 | 0.07 | 0.11 | 0.05 | 0     | 0    | 0.02  | 0.02 | 0.1   | 0.05 |
| 4                 | 0.84 | 0.06 | 0.07 | 0.05 | 0     | 0    | 0.02  | 0.02 | 0.08  | 0.04 |
| 5                 | 0.86 | 0.06 | 0.06 | 0.05 | 0     | 0    | 0.02  | 0.02 | 0.06  | 0.04 |
| 6                 | 0.88 | 0.06 | 0.05 | 0.04 | 0     | 0    | 0.01  | 0.02 | 0.05  | 0.04 |
| 7                 | 0.89 | 0.06 | 0.05 | 0.04 | 0     | 0    | 0.01  | 0.01 | 0.05  | 0.04 |
| 8                 | 0.9  | 0.06 | 0.05 | 0.04 | 0     | 0    | 0.01  | 0.01 | 0.04  | 0.04 |
| 9                 | 0.89 | 0.06 | 0.05 | 0.05 | 0     | 0    | 0.01  | 0.01 | 0.05  | 0.04 |
| 10                | 0.91 | 0.06 | 0.05 | 0.04 | 0     | 0    | 0.01  | 0.01 | 0.04  | 0.04 |
| 11                | 0.91 | 0.06 | 0.05 | 0.04 | 0     | 0    | 0.01  | 0.01 | 0.04  | 0.04 |
| 12                | 0.92 | 0.06 | 0.04 | 0.04 | 0     | 0    | 0.01  | 0.01 | 0.04  | 0.04 |

**age=30 years, timing allo >6 months, cmv=others, donor=UD, graft=BM, TBI=no TBI, In vivo Tcell depletion=yes,**

| Landmark time (y) | GRFS | se   | GF   | se   | AGVHD | se   | CGVHD | se   | Death | se   |
|-------------------|------|------|------|------|-------|------|-------|------|-------|------|
| 0                 | 0.59 | 0.07 | 0.13 | 0.05 | 0.08  | 0.04 | 0.02  | 0.02 | 0.18  | 0.05 |

|    |      |      |      |      |      |      |      |      |      |      |
|----|------|------|------|------|------|------|------|------|------|------|
| 1  | 0.62 | 0.07 | 0.13 | 0.05 | 0.07 | 0.04 | 0.02 | 0.02 | 0.16 | 0.05 |
| 2  | 0.69 | 0.08 | 0.11 | 0.05 | 0.01 | 0.02 | 0.03 | 0.02 | 0.16 | 0.06 |
| 3  | 0.71 | 0.08 | 0.12 | 0.06 | 0    | 0    | 0.03 | 0.02 | 0.14 | 0.06 |
| 4  | 0.79 | 0.07 | 0.08 | 0.05 | 0    | 0    | 0.02 | 0.02 | 0.11 | 0.06 |
| 5  | 0.82 | 0.07 | 0.06 | 0.05 | 0    | 0    | 0.02 | 0.02 | 0.09 | 0.05 |
| 6  | 0.85 | 0.07 | 0.06 | 0.05 | 0    | 0    | 0.02 | 0.02 | 0.08 | 0.05 |
| 7  | 0.86 | 0.07 | 0.06 | 0.05 | 0    | 0    | 0.01 | 0.02 | 0.07 | 0.05 |
| 8  | 0.87 | 0.07 | 0.06 | 0.05 | 0    | 0    | 0.01 | 0.02 | 0.06 | 0.05 |
| 9  | 0.86 | 0.07 | 0.06 | 0.05 | 0    | 0    | 0.01 | 0.02 | 0.07 | 0.05 |
| 10 | 0.88 | 0.07 | 0.05 | 0.05 | 0    | 0    | 0.01 | 0.02 | 0.06 | 0.05 |
| 11 | 0.89 | 0.07 | 0.05 | 0.05 | 0    | 0    | 0.01 | 0.02 | 0.05 | 0.05 |
| 12 | 0.89 | 0.07 | 0.04 | 0.05 | 0    | 0    | 0.01 | 0.02 | 0.06 | 0.05 |

**age=40 years, timing allo >6 months, cmv=others, donor=UD, graft=BM, TBI=no TBI, In vivo Tcell depletion=yes,**

| Landmark time (y) | GRFS | se   | GF   | se   | AGVHD | se   | CGVHD | se   | Death | se   |
|-------------------|------|------|------|------|-------|------|-------|------|-------|------|
| 0                 | 0.49 | 0.08 | 0.14 | 0.05 | 0.11  | 0.05 | 0.03  | 0.02 | 0.24  | 0.06 |
| 1                 | 0.53 | 0.08 | 0.14 | 0.06 | 0.09  | 0.06 | 0.03  | 0.02 | 0.21  | 0.07 |
| 2                 | 0.61 | 0.09 | 0.12 | 0.06 | 0.02  | 0.03 | 0.04  | 0.03 | 0.22  | 0.07 |
| 3                 | 0.64 | 0.09 | 0.13 | 0.07 | 0     | 0    | 0.04  | 0.03 | 0.2   | 0.08 |
| 4                 | 0.73 | 0.09 | 0.08 | 0.06 | 0     | 0    | 0.03  | 0.03 | 0.15  | 0.08 |
| 5                 | 0.77 | 0.09 | 0.07 | 0.06 | 0     | 0    | 0.04  | 0.03 | 0.12  | 0.07 |
| 6                 | 0.8  | 0.09 | 0.06 | 0.06 | 0     | 0    | 0.03  | 0.03 | 0.11  | 0.07 |
| 7                 | 0.82 | 0.09 | 0.06 | 0.06 | 0     | 0    | 0.02  | 0.02 | 0.1   | 0.07 |
| 8                 | 0.83 | 0.09 | 0.06 | 0.06 | 0     | 0    | 0.02  | 0.02 | 0.09  | 0.07 |
| 9                 | 0.82 | 0.09 | 0.07 | 0.06 | 0     | 0    | 0.02  | 0.02 | 0.09  | 0.07 |
| 10                | 0.85 | 0.09 | 0.06 | 0.06 | 0     | 0    | 0.01  | 0.02 | 0.09  | 0.07 |
| 11                | 0.85 | 0.09 | 0.06 | 0.06 | 0     | 0    | 0.01  | 0.02 | 0.08  | 0.06 |
| 12                | 0.86 | 0.09 | 0.05 | 0.06 | 0     | 0    | 0.01  | 0.02 | 0.08  | 0.07 |

**age=50 years, timing allo >6 months, cmv=others, donor=UD, graft=BM, TBI=no TBI, In vivo Tcell depletion=yes,**

| Landmark time (y) | GRFS | se   | GF   | se   | AGVHD | se   | CGVHD | se   | Death | se   |
|-------------------|------|------|------|------|-------|------|-------|------|-------|------|
| 0                 | 0.38 | 0.09 | 0.13 | 0.06 | 0.15  | 0.07 | 0.03  | 0.02 | 0.31  | 0.08 |
| 1                 | 0.42 | 0.1  | 0.14 | 0.07 | 0.12  | 0.08 | 0.04  | 0.03 | 0.27  | 0.09 |
| 2                 | 0.51 | 0.11 | 0.12 | 0.07 | 0.02  | 0.05 | 0.05  | 0.03 | 0.3   | 0.1  |
| 3                 | 0.55 | 0.12 | 0.13 | 0.08 | 0     | 0    | 0.05  | 0.04 | 0.27  | 0.1  |
| 4                 | 0.65 | 0.12 | 0.09 | 0.08 | 0     | 0    | 0.05  | 0.04 | 0.21  | 0.11 |
| 5                 | 0.7  | 0.12 | 0.07 | 0.07 | 0     | 0    | 0.05  | 0.04 | 0.17  | 0.11 |
| 6                 | 0.74 | 0.12 | 0.07 | 0.07 | 0     | 0    | 0.04  | 0.04 | 0.15  | 0.1  |
| 7                 | 0.77 | 0.12 | 0.07 | 0.07 | 0     | 0    | 0.02  | 0.03 | 0.14  | 0.1  |
| 8                 | 0.78 | 0.12 | 0.07 | 0.08 | 0     | 0    | 0.02  | 0.04 | 0.13  | 0.1  |
| 9                 | 0.77 | 0.13 | 0.07 | 0.08 | 0     | 0    | 0.02  | 0.04 | 0.13  | 0.1  |
| 10                | 0.8  | 0.12 | 0.06 | 0.08 | 0     | 0    | 0.02  | 0.03 | 0.12  | 0.1  |
| 11                | 0.81 | 0.12 | 0.06 | 0.08 | 0     | 0    | 0.02  | 0.03 | 0.11  | 0.1  |
| 12                | 0.82 | 0.12 | 0.05 | 0.07 | 0     | 0    | 0.02  | 0.03 | 0.11  | 0.1  |

**age=10 years, timing allo <6 months, cmv=others, donor=UD, graft=BM, TBI=no TBI, In vivo Tcell depletion=yes,**

| Landmark time (y) | GRFS | se   | GF   | se   | AGVHD | se   | CGVHD | se   | Death | se   |
|-------------------|------|------|------|------|-------|------|-------|------|-------|------|
| 0                 | 0.71 | 0.07 | 0.11 | 0.05 | 0.08  | 0.05 | 0.02  | 0.02 | 0.08  | 0.03 |
| 1                 | 0.74 | 0.07 | 0.1  | 0.05 | 0.06  | 0.05 | 0.03  | 0.02 | 0.07  | 0.03 |
| 2                 | 0.8  | 0.07 | 0.09 | 0.06 | 0.01  | 0.03 | 0.03  | 0.02 | 0.07  | 0.04 |
| 3                 | 0.82 | 0.07 | 0.09 | 0.06 | 0     | 0    | 0.03  | 0.02 | 0.06  | 0.04 |
| 4                 | 0.87 | 0.06 | 0.06 | 0.05 | 0     | 0    | 0.03  | 0.02 | 0.05  | 0.03 |
| 5                 | 0.89 | 0.06 | 0.05 | 0.05 | 0     | 0    | 0.03  | 0.02 | 0.04  | 0.03 |
| 6                 | 0.91 | 0.06 | 0.04 | 0.05 | 0     | 0    | 0.02  | 0.02 | 0.03  | 0.03 |
| 7                 | 0.92 | 0.06 | 0.04 | 0.05 | 0     | 0    | 0.01  | 0.02 | 0.03  | 0.03 |
| 8                 | 0.92 | 0.06 | 0.04 | 0.05 | 0     | 0    | 0.01  | 0.02 | 0.03  | 0.03 |
| 9                 | 0.92 | 0.06 | 0.04 | 0.05 | 0     | 0    | 0.01  | 0.02 | 0.03  | 0.03 |
| 10                | 0.93 | 0.06 | 0.04 | 0.05 | 0     | 0    | 0.01  | 0.02 | 0.03  | 0.03 |
| 11                | 0.93 | 0.06 | 0.04 | 0.05 | 0     | 0    | 0.01  | 0.02 | 0.02  | 0.03 |
| 12                | 0.94 | 0.05 | 0.03 | 0.04 | 0     | 0    | 0.01  | 0.02 | 0.02  | 0.03 |

**age=20 years, timing allo <6 months, cmv=others, donor=UD, graft=BM, TBI=no TBI, In vivo Tcell depletion=yes,**

| Landmark time (y) | GRFS | se   | GF   | se   | AGVHD | se   | CGVHD | se   | Death | se   |
|-------------------|------|------|------|------|-------|------|-------|------|-------|------|
| 0                 | 0.63 | 0.08 | 0.11 | 0.06 | 0.11  | 0.06 | 0.03  | 0.02 | 0.11  | 0.04 |
| 1                 | 0.67 | 0.09 | 0.11 | 0.06 | 0.09  | 0.07 | 0.04  | 0.02 | 0.1   | 0.04 |
| 2                 | 0.74 | 0.08 | 0.1  | 0.06 | 0.02  | 0.04 | 0.04  | 0.03 | 0.1   | 0.05 |
| 3                 | 0.77 | 0.08 | 0.1  | 0.06 | 0     | 0    | 0.04  | 0.03 | 0.09  | 0.05 |
| 4                 | 0.83 | 0.08 | 0.06 | 0.06 | 0     | 0    | 0.04  | 0.03 | 0.07  | 0.05 |
| 5                 | 0.86 | 0.07 | 0.05 | 0.06 | 0     | 0    | 0.04  | 0.03 | 0.05  | 0.04 |
| 6                 | 0.88 | 0.07 | 0.05 | 0.05 | 0     | 0    | 0.03  | 0.03 | 0.05  | 0.04 |
| 7                 | 0.89 | 0.07 | 0.05 | 0.05 | 0     | 0    | 0.02  | 0.03 | 0.04  | 0.04 |
| 8                 | 0.9  | 0.07 | 0.05 | 0.05 | 0     | 0    | 0.02  | 0.03 | 0.04  | 0.04 |
| 9                 | 0.89 | 0.07 | 0.05 | 0.06 | 0     | 0    | 0.02  | 0.03 | 0.04  | 0.04 |
| 10                | 0.91 | 0.07 | 0.04 | 0.05 | 0     | 0    | 0.01  | 0.02 | 0.04  | 0.04 |
| 11                | 0.91 | 0.07 | 0.04 | 0.05 | 0     | 0    | 0.01  | 0.02 | 0.03  | 0.04 |
| 12                | 0.92 | 0.07 | 0.03 | 0.05 | 0     | 0    | 0.01  | 0.02 | 0.03  | 0.04 |

**age=30 years, timing allo <6 months, cmv=others, donor=UD, graft=BM, TBI=no TBI, In vivo Tcell depletion=yes,**

| Landmark time (y) | GRFS | se   | GF   | se   | AGVHD | se   | CGVHD | se   | Death | se   |
|-------------------|------|------|------|------|-------|------|-------|------|-------|------|
| 0                 | 0.54 | 0.1  | 0.12 | 0.06 | 0.15  | 0.09 | 0.04  | 0.03 | 0.15  | 0.05 |
| 1                 | 0.58 | 0.1  | 0.12 | 0.06 | 0.12  | 0.09 | 0.05  | 0.03 | 0.13  | 0.06 |
| 2                 | 0.68 | 0.1  | 0.1  | 0.07 | 0.02  | 0.05 | 0.06  | 0.04 | 0.14  | 0.06 |
| 3                 | 0.71 | 0.1  | 0.11 | 0.07 | 0     | 0    | 0.06  | 0.04 | 0.12  | 0.07 |
| 4                 | 0.78 | 0.1  | 0.07 | 0.07 | 0     | 0    | 0.05  | 0.04 | 0.09  | 0.06 |
| 5                 | 0.81 | 0.09 | 0.06 | 0.07 | 0     | 0    | 0.06  | 0.05 | 0.07  | 0.06 |
| 6                 | 0.84 | 0.09 | 0.05 | 0.06 | 0     | 0    | 0.04  | 0.04 | 0.07  | 0.06 |
| 7                 | 0.86 | 0.09 | 0.05 | 0.06 | 0     | 0    | 0.02  | 0.04 | 0.06  | 0.06 |
| 8                 | 0.87 | 0.09 | 0.05 | 0.07 | 0     | 0    | 0.02  | 0.04 | 0.06  | 0.05 |



|    |      |      |      |      |   |   |      |      |      |      |
|----|------|------|------|------|---|---|------|------|------|------|
| 9  | 0.86 | 0.09 | 0.05 | 0.07 | 0 | 0 | 0.02 | 0.04 | 0.06 | 0.06 |
| 10 | 0.88 | 0.09 | 0.05 | 0.06 | 0 | 0 | 0.02 | 0.03 | 0.05 | 0.05 |
| 11 | 0.89 | 0.09 | 0.05 | 0.07 | 0 | 0 | 0.02 | 0.03 | 0.05 | 0.05 |
| 12 | 0.89 | 0.08 | 0.04 | 0.06 | 0 | 0 | 0.02 | 0.03 | 0.05 | 0.05 |

**age=40 years, timing allo <6 months, cmv=others, donor=UD, graft=BM, TBI=no TBI, In vivo Tcell depletion=yes,**

| Landmark time (y) | GRFS | se   | GF   | se   | AGVHD | se   | CGVHD | se   | Death | se   |
|-------------------|------|------|------|------|-------|------|-------|------|-------|------|
| 0                 | 0.44 | 0.11 | 0.12 | 0.07 | 0.2   | 0.12 | 0.06  | 0.04 | 0.19  | 0.07 |
| 1                 | 0.48 | 0.12 | 0.12 | 0.07 | 0.17  | 0.13 | 0.06  | 0.04 | 0.17  | 0.08 |
| 2                 | 0.59 | 0.12 | 0.11 | 0.08 | 0.03  | 0.08 | 0.08  | 0.06 | 0.19  | 0.09 |
| 3                 | 0.63 | 0.12 | 0.12 | 0.09 | 0     | 0    | 0.08  | 0.06 | 0.17  | 0.09 |
| 4                 | 0.72 | 0.13 | 0.08 | 0.08 | 0     | 0    | 0.08  | 0.07 | 0.13  | 0.09 |
| 5                 | 0.75 | 0.12 | 0.06 | 0.08 | 0     | 0    | 0.08  | 0.07 | 0.1   | 0.09 |
| 6                 | 0.79 | 0.12 | 0.06 | 0.08 | 0     | 0    | 0.06  | 0.07 | 0.09  | 0.08 |
| 7                 | 0.82 | 0.12 | 0.06 | 0.08 | 0     | 0    | 0.03  | 0.05 | 0.09  | 0.08 |
| 8                 | 0.83 | 0.12 | 0.06 | 0.08 | 0     | 0    | 0.04  | 0.05 | 0.08  | 0.08 |
| 9                 | 0.82 | 0.12 | 0.06 | 0.08 | 0     | 0    | 0.04  | 0.06 | 0.08  | 0.08 |
| 10                | 0.85 | 0.12 | 0.05 | 0.08 | 0     | 0    | 0.03  | 0.05 | 0.07  | 0.08 |
| 11                | 0.85 | 0.12 | 0.05 | 0.08 | 0     | 0    | 0.03  | 0.05 | 0.07  | 0.08 |
| 12                | 0.86 | 0.12 | 0.04 | 0.07 | 0     | 0    | 0.03  | 0.05 | 0.07  | 0.08 |

**age=50 years, timing allo <6 months, cmv=others, donor=UD, graft=BM, TBI=no TBI, In vivo Tcell depletion=yes,**

| Landmark time (y) | GRFS | se   | GF   | se   | AGVHD | se   | CGVHD | se   | Death | se   |
|-------------------|------|------|------|------|-------|------|-------|------|-------|------|
| 0                 | 0.32 | 0.12 | 0.11 | 0.07 | 0.26  | 0.17 | 0.07  | 0.05 | 0.24  | 0.09 |
| 1                 | 0.37 | 0.14 | 0.12 | 0.08 | 0.22  | 0.18 | 0.07  | 0.06 | 0.21  | 0.1  |
| 2                 | 0.48 | 0.15 | 0.11 | 0.09 | 0.05  | 0.12 | 0.11  | 0.08 | 0.25  | 0.12 |
| 3                 | 0.54 | 0.15 | 0.12 | 0.1  | 0     | 0    | 0.11  | 0.09 | 0.23  | 0.13 |
| 4                 | 0.63 | 0.16 | 0.08 | 0.1  | 0     | 0    | 0.11  | 0.1  | 0.18  | 0.13 |
| 5                 | 0.68 | 0.17 | 0.07 | 0.09 | 0     | 0    | 0.11  | 0.1  | 0.14  | 0.12 |
| 6                 | 0.73 | 0.17 | 0.06 | 0.09 | 0     | 0    | 0.08  | 0.1  | 0.13  | 0.12 |
| 7                 | 0.76 | 0.17 | 0.06 | 0.1  | 0     | 0    | 0.05  | 0.08 | 0.12  | 0.12 |
| 8                 | 0.77 | 0.16 | 0.06 | 0.1  | 0     | 0    | 0.05  | 0.08 | 0.11  | 0.12 |
| 9                 | 0.77 | 0.17 | 0.07 | 0.1  | 0     | 0    | 0.05  | 0.09 | 0.11  | 0.12 |
| 10                | 0.8  | 0.16 | 0.06 | 0.1  | 0     | 0    | 0.04  | 0.08 | 0.11  | 0.12 |
| 11                | 0.81 | 0.16 | 0.06 | 0.1  | 0     | 0    | 0.04  | 0.08 | 0.09  | 0.12 |
| 12                | 0.81 | 0.16 | 0.05 | 0.09 | 0     | 0    | 0.04  | 0.08 | 0.1   | 0.12 |

**age=10 years, timing allo >6 months, cmv=D-/R-, donor=MRD, graft=PBSC, TBI=no TBI, In vivo Tcell depletion=yes,**

| Landmark time (y) | GRFS | se   | GF   | se   | AGVHD | se | CGVHD | se   | Death | se   |
|-------------------|------|------|------|------|-------|----|-------|------|-------|------|
| 0                 | 0.93 | 0.03 | 0.02 | 0.02 | 0     | 0  | 0.01  | 0.01 | 0.04  | 0.02 |
| 1                 | 0.93 | 0.03 | 0.01 | 0.02 | 0     | 0  | 0.01  | 0.01 | 0.04  | 0.02 |
| 2                 | 0.94 | 0.03 | 0.01 | 0.02 | 0     | 0  | 0.01  | 0.01 | 0.04  | 0.02 |
| 3                 | 0.94 | 0.03 | 0.01 | 0.02 | 0     | 0  | 0.01  | 0.01 | 0.03  | 0.02 |
| 4                 | 0.96 | 0.03 | 0.01 | 0.01 | 0     | 0  | 0.01  | 0.01 | 0.02  | 0.02 |

|    |      |      |      |      |   |   |      |      |      |      |
|----|------|------|------|------|---|---|------|------|------|------|
| 5  | 0.96 | 0.03 | 0.01 | 0.01 | 0 | 0 | 0.01 | 0.01 | 0.02 | 0.02 |
| 6  | 0.97 | 0.03 | 0.01 | 0.01 | 0 | 0 | 0.01 | 0.01 | 0.02 | 0.02 |
| 7  | 0.98 | 0.02 | 0.01 | 0.01 | 0 | 0 | 0.01 | 0.01 | 0.01 | 0.02 |
| 8  | 0.98 | 0.02 | 0.01 | 0.01 | 0 | 0 | 0.01 | 0.01 | 0.01 | 0.02 |
| 9  | 0.98 | 0.02 | 0.01 | 0.01 | 0 | 0 | 0.01 | 0.01 | 0.01 | 0.02 |
| 10 | 0.98 | 0.02 | 0    | 0.01 | 0 | 0 | 0    | 0.01 | 0.01 | 0.02 |
| 11 | 0.98 | 0.02 | 0    | 0.01 | 0 | 0 | 0    | 0.01 | 0.01 | 0.02 |
| 12 | 0.98 | 0.02 | 0    | 0.01 | 0 | 0 | 0    | 0.01 | 0.01 | 0.02 |

**age=20 years, timing allo >6 months, cmv=D-/R-, donor=MRD, graft=PBSC, TBI=no TBI, In vivo Tcell depletion=yes,**

| Landmark time (y) | GRFS | se   | GF   | se   | AGVHD | se | CGVHD | se   | Death | se   |
|-------------------|------|------|------|------|-------|----|-------|------|-------|------|
| 0                 | 0.9  | 0.04 | 0.02 | 0.02 | 0     | 0  | 0.02  | 0.02 | 0.06  | 0.03 |
| 1                 | 0.91 | 0.04 | 0.02 | 0.02 | 0     | 0  | 0.02  | 0.02 | 0.05  | 0.03 |
| 2                 | 0.91 | 0.04 | 0.01 | 0.02 | 0     | 0  | 0.02  | 0.02 | 0.05  | 0.03 |
| 3                 | 0.92 | 0.04 | 0.01 | 0.02 | 0     | 0  | 0.02  | 0.02 | 0.04  | 0.03 |
| 4                 | 0.94 | 0.04 | 0.01 | 0.01 | 0     | 0  | 0.02  | 0.02 | 0.03  | 0.03 |
| 5                 | 0.95 | 0.03 | 0.01 | 0.01 | 0     | 0  | 0.02  | 0.02 | 0.03  | 0.03 |
| 6                 | 0.96 | 0.03 | 0.01 | 0.01 | 0     | 0  | 0.01  | 0.02 | 0.02  | 0.02 |
| 7                 | 0.97 | 0.03 | 0.01 | 0.01 | 0     | 0  | 0.01  | 0.02 | 0.02  | 0.02 |
| 8                 | 0.97 | 0.03 | 0.01 | 0.01 | 0     | 0  | 0.01  | 0.02 | 0.02  | 0.02 |
| 9                 | 0.97 | 0.03 | 0.01 | 0.01 | 0     | 0  | 0.01  | 0.02 | 0.02  | 0.02 |
| 10                | 0.97 | 0.03 | 0.01 | 0.01 | 0     | 0  | 0.01  | 0.01 | 0.02  | 0.02 |
| 11                | 0.97 | 0.03 | 0.01 | 0.01 | 0     | 0  | 0.01  | 0.01 | 0.02  | 0.02 |
| 12                | 0.97 | 0.03 | 0    | 0.01 | 0     | 0  | 0.01  | 0.01 | 0.02  | 0.02 |

**age=30 years, timing allo >6 months, cmv=D-/R-, donor=MRD, graft=PBSC, TBI=no TBI, In vivo Tcell depletion=yes,**

| Landmark time (y) | GRFS | se   | GF   | se   | AGVHD | se | CGVHD | se   | Death | se   |
|-------------------|------|------|------|------|-------|----|-------|------|-------|------|
| 0                 | 0.86 | 0.05 | 0.02 | 0.02 | 0     | 0  | 0.03  | 0.02 | 0.09  | 0.04 |
| 1                 | 0.88 | 0.05 | 0.02 | 0.02 | 0     | 0  | 0.03  | 0.02 | 0.08  | 0.04 |
| 2                 | 0.88 | 0.05 | 0.01 | 0.02 | 0     | 0  | 0.03  | 0.03 | 0.07  | 0.04 |
| 3                 | 0.89 | 0.05 | 0.01 | 0.02 | 0     | 0  | 0.03  | 0.03 | 0.06  | 0.04 |
| 4                 | 0.92 | 0.05 | 0.01 | 0.02 | 0     | 0  | 0.02  | 0.03 | 0.05  | 0.04 |
| 5                 | 0.93 | 0.05 | 0.01 | 0.01 | 0     | 0  | 0.03  | 0.03 | 0.04  | 0.03 |
| 6                 | 0.94 | 0.04 | 0.01 | 0.01 | 0     | 0  | 0.02  | 0.02 | 0.03  | 0.03 |
| 7                 | 0.95 | 0.04 | 0.01 | 0.01 | 0     | 0  | 0.01  | 0.02 | 0.03  | 0.03 |
| 8                 | 0.96 | 0.04 | 0.01 | 0.01 | 0     | 0  | 0.01  | 0.02 | 0.03  | 0.03 |
| 9                 | 0.95 | 0.04 | 0.01 | 0.01 | 0     | 0  | 0.01  | 0.02 | 0.03  | 0.03 |
| 10                | 0.96 | 0.04 | 0.01 | 0.01 | 0     | 0  | 0.01  | 0.02 | 0.03  | 0.03 |
| 11                | 0.96 | 0.04 | 0.01 | 0.01 | 0     | 0  | 0.01  | 0.02 | 0.02  | 0.03 |
| 12                | 0.96 | 0.04 | 0    | 0.01 | 0     | 0  | 0.01  | 0.02 | 0.02  | 0.03 |

**age=40 years, timing allo >6 months, cmv=D-/R-, donor=MRD, graft=PBSC, TBI=no TBI, In vivo Tcell depletion=yes,**

| Landmark time (y) | GRFS | se   | GF   | se   | AGVHD | se   | CGVHD | se   | Death | se   |
|-------------------|------|------|------|------|-------|------|-------|------|-------|------|
| 0                 | 0.81 | 0.06 | 0.02 | 0.02 | 0.01  | 0.01 | 0.04  | 0.03 | 0.12  | 0.05 |

|    |      |      |      |      |   |      |      |      |      |      |
|----|------|------|------|------|---|------|------|------|------|------|
| 1  | 0.83 | 0.06 | 0.02 | 0.02 | 0 | 0.01 | 0.04 | 0.03 | 0.11 | 0.05 |
| 2  | 0.84 | 0.07 | 0.02 | 0.02 | 0 | 0    | 0.04 | 0.04 | 0.1  | 0.06 |
| 3  | 0.85 | 0.07 | 0.02 | 0.02 | 0 | 0    | 0.04 | 0.04 | 0.09 | 0.05 |
| 4  | 0.89 | 0.06 | 0.01 | 0.02 | 0 | 0    | 0.04 | 0.04 | 0.07 | 0.05 |
| 5  | 0.9  | 0.06 | 0.01 | 0.02 | 0 | 0    | 0.04 | 0.04 | 0.05 | 0.05 |
| 6  | 0.92 | 0.06 | 0.01 | 0.01 | 0 | 0    | 0.03 | 0.03 | 0.05 | 0.05 |
| 7  | 0.93 | 0.05 | 0.01 | 0.01 | 0 | 0    | 0.02 | 0.03 | 0.04 | 0.04 |
| 8  | 0.94 | 0.05 | 0.01 | 0.01 | 0 | 0    | 0.02 | 0.03 | 0.04 | 0.04 |
| 9  | 0.94 | 0.05 | 0.01 | 0.02 | 0 | 0    | 0.02 | 0.03 | 0.04 | 0.04 |
| 10 | 0.94 | 0.05 | 0.01 | 0.01 | 0 | 0    | 0.01 | 0.03 | 0.04 | 0.04 |
| 11 | 0.95 | 0.05 | 0.01 | 0.01 | 0 | 0    | 0.01 | 0.03 | 0.03 | 0.04 |
| 12 | 0.95 | 0.05 | 0.01 | 0.01 | 0 | 0    | 0.01 | 0.03 | 0.03 | 0.04 |

**age=50 years, timing allo >6 months, cmv=D-/R-, donor=MRD, graft=PBSC, TBI=no TBI, In vivo Tcell depletion=yes,**

| Landmark time (y) | GRFS | se   | GF   | se   | AGVHD | se   | CGVHD | se   | Death | se   |
|-------------------|------|------|------|------|-------|------|-------|------|-------|------|
| 0                 | 0.74 | 0.08 | 0.02 | 0.02 | 0.01  | 0.01 | 0.05  | 0.04 | 0.17  | 0.07 |
| 1                 | 0.77 | 0.08 | 0.02 | 0.02 | 0.01  | 0.01 | 0.05  | 0.04 | 0.15  | 0.07 |
| 2                 | 0.78 | 0.09 | 0.02 | 0.02 | 0     | 0    | 0.06  | 0.05 | 0.15  | 0.08 |
| 3                 | 0.8  | 0.09 | 0.02 | 0.02 | 0     | 0    | 0.06  | 0.05 | 0.13  | 0.08 |
| 4                 | 0.84 | 0.09 | 0.01 | 0.02 | 0     | 0    | 0.05  | 0.05 | 0.09  | 0.07 |
| 5                 | 0.86 | 0.08 | 0.01 | 0.02 | 0     | 0    | 0.05  | 0.05 | 0.07  | 0.07 |
| 6                 | 0.89 | 0.08 | 0.01 | 0.02 | 0     | 0    | 0.04  | 0.05 | 0.07  | 0.07 |
| 7                 | 0.91 | 0.08 | 0.01 | 0.02 | 0     | 0    | 0.02  | 0.04 | 0.06  | 0.06 |
| 8                 | 0.91 | 0.08 | 0.01 | 0.02 | 0     | 0    | 0.02  | 0.04 | 0.06  | 0.06 |
| 9                 | 0.91 | 0.08 | 0.01 | 0.02 | 0     | 0    | 0.02  | 0.04 | 0.06  | 0.06 |
| 10                | 0.92 | 0.07 | 0.01 | 0.02 | 0     | 0    | 0.02  | 0.04 | 0.05  | 0.06 |
| 11                | 0.93 | 0.07 | 0.01 | 0.02 | 0     | 0    | 0.02  | 0.04 | 0.05  | 0.06 |
| 12                | 0.93 | 0.07 | 0.01 | 0.02 | 0     | 0    | 0.02  | 0.04 | 0.05  | 0.06 |

**age=10 years, timing allo <6 months, cmv=D-/R-, donor=MRD, graft=PBSC, TBI=no TBI, In vivo Tcell depletion=yes,**

| Landmark time (y) | GRFS | se   | GF   | se   | AGVHD | se | CGVHD | se   | Death | se   |
|-------------------|------|------|------|------|-------|----|-------|------|-------|------|
| 0                 | 0.92 | 0.04 | 0.01 | 0.01 | 0     | 0  | 0.03  | 0.03 | 0.04  | 0.02 |
| 1                 | 0.92 | 0.04 | 0.01 | 0.01 | 0     | 0  | 0.03  | 0.03 | 0.03  | 0.02 |
| 2                 | 0.93 | 0.04 | 0.01 | 0.01 | 0     | 0  | 0.03  | 0.03 | 0.03  | 0.02 |
| 3                 | 0.93 | 0.04 | 0.01 | 0.01 | 0     | 0  | 0.03  | 0.03 | 0.03  | 0.02 |
| 4                 | 0.95 | 0.04 | 0.01 | 0.01 | 0     | 0  | 0.03  | 0.03 | 0.02  | 0.02 |
| 5                 | 0.95 | 0.04 | 0.01 | 0.01 | 0     | 0  | 0.03  | 0.03 | 0.02  | 0.02 |
| 6                 | 0.96 | 0.04 | 0    | 0.01 | 0     | 0  | 0.02  | 0.03 | 0.01  | 0.02 |
| 7                 | 0.97 | 0.03 | 0    | 0.01 | 0     | 0  | 0.01  | 0.03 | 0.01  | 0.02 |
| 8                 | 0.97 | 0.03 | 0    | 0.01 | 0     | 0  | 0.01  | 0.03 | 0.01  | 0.02 |
| 9                 | 0.97 | 0.03 | 0.01 | 0.01 | 0     | 0  | 0.01  | 0.03 | 0.01  | 0.02 |
| 10                | 0.98 | 0.03 | 0    | 0.01 | 0     | 0  | 0.01  | 0.02 | 0.01  | 0.02 |
| 11                | 0.98 | 0.03 | 0    | 0.01 | 0     | 0  | 0.01  | 0.02 | 0.01  | 0.01 |
| 12                | 0.98 | 0.03 | 0    | 0.01 | 0     | 0  | 0.01  | 0.02 | 0.01  | 0.02 |

**age=20 years, timing allo <6 months, cmv=D-/R-, donor=MRD, graft=PBSC, TBI=no TBI, In vivo Tcell depletion=yes,**

| Landmark time (y) | GRFS | se   | GF   | se   | AGVHD | se   | CGVHD | se   | Death | se   |
|-------------------|------|------|------|------|-------|------|-------|------|-------|------|
| 0                 | 0.88 | 0.05 | 0.02 | 0.01 | 0.01  | 0.01 | 0.04  | 0.04 | 0.05  | 0.03 |
| 1                 | 0.89 | 0.05 | 0.02 | 0.01 | 0     | 0.01 | 0.04  | 0.04 | 0.05  | 0.03 |
| 2                 | 0.9  | 0.05 | 0.01 | 0.01 | 0     | 0    | 0.05  | 0.04 | 0.04  | 0.03 |
| 3                 | 0.91 | 0.05 | 0.01 | 0.01 | 0     | 0    | 0.04  | 0.04 | 0.04  | 0.03 |
| 4                 | 0.93 | 0.05 | 0.01 | 0.01 | 0     | 0    | 0.04  | 0.04 | 0.03  | 0.03 |
| 5                 | 0.93 | 0.05 | 0.01 | 0.01 | 0     | 0    | 0.04  | 0.04 | 0.02  | 0.02 |
| 6                 | 0.95 | 0.05 | 0.01 | 0.01 | 0     | 0    | 0.03  | 0.04 | 0.02  | 0.02 |
| 7                 | 0.96 | 0.04 | 0.01 | 0.01 | 0     | 0    | 0.02  | 0.04 | 0.02  | 0.02 |
| 8                 | 0.96 | 0.04 | 0.01 | 0.01 | 0     | 0    | 0.02  | 0.04 | 0.02  | 0.02 |
| 9                 | 0.96 | 0.04 | 0.01 | 0.01 | 0     | 0    | 0.02  | 0.04 | 0.02  | 0.02 |
| 10                | 0.97 | 0.04 | 0    | 0.01 | 0     | 0    | 0.01  | 0.03 | 0.02  | 0.02 |
| 11                | 0.97 | 0.04 | 0    | 0.01 | 0     | 0    | 0.01  | 0.03 | 0.01  | 0.02 |
| 12                | 0.97 | 0.04 | 0    | 0.01 | 0     | 0    | 0.01  | 0.03 | 0.01  | 0.02 |

**age=30 years, timing allo <6 months, cmv=D-/R-, donor=MRD, graft=PBSC, TBI=no TBI, In vivo Tcell depletion=yes,**

| Landmark time (y) | GRFS | se   | GF   | se   | AGVHD | se   | CGVHD | se   | Death | se   |
|-------------------|------|------|------|------|-------|------|-------|------|-------|------|
| 0                 | 0.84 | 0.07 | 0.02 | 0.02 | 0.01  | 0.01 | 0.06  | 0.05 | 0.08  | 0.04 |
| 1                 | 0.85 | 0.07 | 0.02 | 0.02 | 0.01  | 0.01 | 0.06  | 0.06 | 0.07  | 0.04 |
| 2                 | 0.86 | 0.07 | 0.01 | 0.02 | 0     | 0    | 0.07  | 0.06 | 0.06  | 0.04 |
| 3                 | 0.87 | 0.07 | 0.01 | 0.02 | 0     | 0    | 0.06  | 0.06 | 0.05  | 0.04 |
| 4                 | 0.9  | 0.07 | 0.01 | 0.01 | 0     | 0    | 0.06  | 0.06 | 0.04  | 0.04 |
| 5                 | 0.9  | 0.07 | 0.01 | 0.01 | 0     | 0    | 0.06  | 0.06 | 0.03  | 0.03 |
| 6                 | 0.92 | 0.07 | 0.01 | 0.01 | 0     | 0    | 0.04  | 0.06 | 0.03  | 0.03 |
| 7                 | 0.94 | 0.06 | 0.01 | 0.01 | 0     | 0    | 0.03  | 0.05 | 0.03  | 0.03 |
| 8                 | 0.95 | 0.06 | 0.01 | 0.01 | 0     | 0    | 0.03  | 0.05 | 0.02  | 0.03 |
| 9                 | 0.94 | 0.06 | 0.01 | 0.01 | 0     | 0    | 0.03  | 0.05 | 0.02  | 0.03 |
| 10                | 0.95 | 0.06 | 0.01 | 0.01 | 0     | 0    | 0.02  | 0.05 | 0.02  | 0.03 |
| 11                | 0.96 | 0.05 | 0.01 | 0.01 | 0     | 0    | 0.02  | 0.05 | 0.02  | 0.03 |
| 12                | 0.96 | 0.05 | 0    | 0.01 | 0     | 0    | 0.02  | 0.05 | 0.02  | 0.03 |

**age=40 years, timing allo <6 months, cmv=D-/R-, donor=MRD, graft=PBSC, TBI=no TBI, In vivo Tcell depletion=yes,**

| Landmark time (y) | GRFS | se   | GF   | se   | AGVHD | se   | CGVHD | se   | Death | se   |
|-------------------|------|------|------|------|-------|------|-------|------|-------|------|
| 0                 | 0.78 | 0.09 | 0.02 | 0.02 | 0.01  | 0.01 | 0.09  | 0.08 | 0.11  | 0.05 |
| 1                 | 0.79 | 0.09 | 0.02 | 0.02 | 0.01  | 0.01 | 0.09  | 0.08 | 0.09  | 0.06 |
| 2                 | 0.8  | 0.1  | 0.01 | 0.02 | 0     | 0.01 | 0.1   | 0.09 | 0.09  | 0.06 |
| 3                 | 0.82 | 0.1  | 0.01 | 0.02 | 0     | 0    | 0.09  | 0.09 | 0.08  | 0.06 |
| 4                 | 0.85 | 0.1  | 0.01 | 0.02 | 0     | 0    | 0.08  | 0.09 | 0.06  | 0.05 |
| 5                 | 0.87 | 0.1  | 0.01 | 0.01 | 0     | 0    | 0.08  | 0.09 | 0.04  | 0.05 |
| 6                 | 0.89 | 0.1  | 0.01 | 0.01 | 0     | 0    | 0.06  | 0.09 | 0.04  | 0.05 |
| 7                 | 0.92 | 0.09 | 0.01 | 0.01 | 0     | 0    | 0.04  | 0.07 | 0.04  | 0.05 |
| 8                 | 0.92 | 0.09 | 0.01 | 0.01 | 0     | 0    | 0.04  | 0.07 | 0.03  | 0.04 |

|    |      |      |      |      |   |   |      |      |      |      |
|----|------|------|------|------|---|---|------|------|------|------|
| 9  | 0.92 | 0.09 | 0.01 | 0.02 | 0 | 0 | 0.04 | 0.07 | 0.03 | 0.05 |
| 10 | 0.93 | 0.08 | 0.01 | 0.01 | 0 | 0 | 0.03 | 0.07 | 0.03 | 0.04 |
| 11 | 0.94 | 0.08 | 0.01 | 0.01 | 0 | 0 | 0.03 | 0.07 | 0.03 | 0.04 |
| 12 | 0.94 | 0.08 | 0.01 | 0.01 | 0 | 0 | 0.03 | 0.07 | 0.03 | 0.04 |

**age=50 years, timing allo <6 months, cmv=D-/R-, donor=MRD, graft=PBSC, TBI=no TBI, In vivo Tcell depletion=yes,**

| Landmark time (y) | GRFS | se   | GF   | se   | AGVHD | se   | CGVHD | se   | Death | se   |
|-------------------|------|------|------|------|-------|------|-------|------|-------|------|
| 0                 | 0.7  | 0.13 | 0.02 | 0.02 | 0.01  | 0.02 | 0.12  | 0.11 | 0.15  | 0.08 |
| 1                 | 0.72 | 0.13 | 0.02 | 0.02 | 0.01  | 0.02 | 0.12  | 0.11 | 0.13  | 0.08 |
| 2                 | 0.72 | 0.14 | 0.02 | 0.02 | 0     | 0.01 | 0.14  | 0.12 | 0.12  | 0.08 |
| 3                 | 0.75 | 0.14 | 0.02 | 0.02 | 0     | 0    | 0.13  | 0.13 | 0.11  | 0.08 |
| 4                 | 0.8  | 0.14 | 0.01 | 0.02 | 0     | 0    | 0.12  | 0.13 | 0.08  | 0.07 |
| 5                 | 0.81 | 0.14 | 0.01 | 0.02 | 0     | 0    | 0.12  | 0.13 | 0.06  | 0.07 |
| 6                 | 0.85 | 0.14 | 0.01 | 0.02 | 0     | 0    | 0.09  | 0.13 | 0.06  | 0.07 |
| 7                 | 0.89 | 0.13 | 0.01 | 0.02 | 0     | 0    | 0.05  | 0.11 | 0.05  | 0.07 |
| 8                 | 0.89 | 0.13 | 0.01 | 0.02 | 0     | 0    | 0.05  | 0.11 | 0.05  | 0.07 |
| 9                 | 0.89 | 0.13 | 0.01 | 0.02 | 0     | 0    | 0.05  | 0.11 | 0.05  | 0.07 |
| 10                | 0.91 | 0.12 | 0.01 | 0.02 | 0     | 0    | 0.04  | 0.1  | 0.04  | 0.07 |
| 11                | 0.91 | 0.12 | 0.01 | 0.02 | 0     | 0    | 0.04  | 0.1  | 0.04  | 0.06 |
| 12                | 0.91 | 0.12 | 0.01 | 0.02 | 0     | 0    | 0.04  | 0.1  | 0.04  | 0.06 |

**age=10 years, timing allo >6 months, cmv=others, donor=MRD, graft=PBSC, TBI=no TBI, In vivo Tcell depletion=yes,**

| Landmark time (y) | GRFS | se   | GF   | se   | AGVHD | se | CGVHD | se   | Death | se   |
|-------------------|------|------|------|------|-------|----|-------|------|-------|------|
| 0                 | 0.88 | 0.05 | 0.07 | 0.05 | 0     | 0  | 0.01  | 0.01 | 0.04  | 0.02 |
| 1                 | 0.89 | 0.05 | 0.06 | 0.05 | 0     | 0  | 0.01  | 0.01 | 0.03  | 0.02 |
| 2                 | 0.91 | 0.05 | 0.05 | 0.05 | 0     | 0  | 0.01  | 0.01 | 0.03  | 0.02 |
| 3                 | 0.91 | 0.05 | 0.05 | 0.05 | 0     | 0  | 0.01  | 0.01 | 0.03  | 0.02 |
| 4                 | 0.94 | 0.05 | 0.03 | 0.04 | 0     | 0  | 0.01  | 0.01 | 0.02  | 0.02 |
| 5                 | 0.95 | 0.04 | 0.03 | 0.04 | 0     | 0  | 0.01  | 0.01 | 0.01  | 0.02 |
| 6                 | 0.96 | 0.04 | 0.02 | 0.04 | 0     | 0  | 0.01  | 0.01 | 0.01  | 0.02 |
| 7                 | 0.96 | 0.04 | 0.02 | 0.04 | 0     | 0  | 0     | 0.01 | 0.01  | 0.02 |
| 8                 | 0.96 | 0.04 | 0.02 | 0.04 | 0     | 0  | 0     | 0.01 | 0.01  | 0.01 |
| 9                 | 0.96 | 0.04 | 0.02 | 0.04 | 0     | 0  | 0     | 0.01 | 0.01  | 0.01 |
| 10                | 0.97 | 0.04 | 0.02 | 0.04 | 0     | 0  | 0     | 0.01 | 0.01  | 0.01 |
| 11                | 0.97 | 0.04 | 0.02 | 0.04 | 0     | 0  | 0     | 0.01 | 0.01  | 0.01 |
| 12                | 0.97 | 0.04 | 0.02 | 0.04 | 0     | 0  | 0     | 0.01 | 0.01  | 0.01 |

**age=20 years, timing allo >6 months, cmv=others, donor=MRD, graft=PBSC, TBI=no TBI, In vivo Tcell depletion=yes,**

| Landmark time (y) | GRFS | se   | GF   | se   | AGVHD | se   | CGVHD | se   | Death | se   |
|-------------------|------|------|------|------|-------|------|-------|------|-------|------|
| 0                 | 0.86 | 0.05 | 0.07 | 0.05 | 0.01  | 0.01 | 0.01  | 0.01 | 0.05  | 0.02 |
| 1                 | 0.87 | 0.05 | 0.07 | 0.05 | 0     | 0.01 | 0.01  | 0.01 | 0.04  | 0.02 |
| 2                 | 0.88 | 0.05 | 0.06 | 0.05 | 0     | 0    | 0.02  | 0.01 | 0.04  | 0.03 |
| 3                 | 0.89 | 0.05 | 0.06 | 0.05 | 0     | 0    | 0.02  | 0.01 | 0.04  | 0.02 |
| 4                 | 0.92 | 0.05 | 0.04 | 0.04 | 0     | 0    | 0.01  | 0.01 | 0.03  | 0.02 |

|    |      |      |      |      |   |   |      |      |      |      |
|----|------|------|------|------|---|---|------|------|------|------|
| 5  | 0.93 | 0.05 | 0.03 | 0.04 | 0 | 0 | 0.01 | 0.02 | 0.02 | 0.02 |
| 6  | 0.95 | 0.04 | 0.03 | 0.04 | 0 | 0 | 0.01 | 0.01 | 0.02 | 0.02 |
| 7  | 0.95 | 0.04 | 0.03 | 0.04 | 0 | 0 | 0.01 | 0.01 | 0.02 | 0.02 |
| 8  | 0.95 | 0.04 | 0.03 | 0.04 | 0 | 0 | 0.01 | 0.01 | 0.02 | 0.02 |
| 9  | 0.95 | 0.05 | 0.03 | 0.04 | 0 | 0 | 0.01 | 0.01 | 0.02 | 0.02 |
| 10 | 0.96 | 0.04 | 0.02 | 0.04 | 0 | 0 | 0    | 0.01 | 0.01 | 0.02 |
| 11 | 0.96 | 0.04 | 0.02 | 0.04 | 0 | 0 | 0    | 0.01 | 0.01 | 0.02 |
| 12 | 0.96 | 0.04 | 0.02 | 0.04 | 0 | 0 | 0    | 0.01 | 0.01 | 0.02 |

**age=30 years, timing allo >6 months, cmv=others, donor=MRD, graft=PBSC, TBI=no TBI, In vivo Tcell depletion=yes,**

| Landmark time (y) | GRFS | se   | GF   | se   | AGVHD | se   | CGVHD | se   | Death | se   |
|-------------------|------|------|------|------|-------|------|-------|------|-------|------|
| 0                 | 0.82 | 0.06 | 0.08 | 0.05 | 0.01  | 0.01 | 0.02  | 0.02 | 0.07  | 0.03 |
| 1                 | 0.83 | 0.06 | 0.08 | 0.05 | 0.01  | 0.01 | 0.02  | 0.02 | 0.06  | 0.03 |
| 2                 | 0.85 | 0.06 | 0.06 | 0.05 | 0     | 0    | 0.02  | 0.02 | 0.06  | 0.03 |
| 3                 | 0.86 | 0.06 | 0.06 | 0.05 | 0     | 0    | 0.02  | 0.02 | 0.05  | 0.03 |
| 4                 | 0.9  | 0.05 | 0.04 | 0.04 | 0     | 0    | 0.02  | 0.02 | 0.04  | 0.03 |
| 5                 | 0.92 | 0.05 | 0.03 | 0.04 | 0     | 0    | 0.02  | 0.02 | 0.03  | 0.03 |
| 6                 | 0.93 | 0.05 | 0.03 | 0.04 | 0     | 0    | 0.01  | 0.02 | 0.03  | 0.03 |
| 7                 | 0.94 | 0.05 | 0.03 | 0.04 | 0     | 0    | 0.01  | 0.02 | 0.02  | 0.03 |
| 8                 | 0.94 | 0.05 | 0.03 | 0.04 | 0     | 0    | 0.01  | 0.02 | 0.02  | 0.02 |
| 9                 | 0.94 | 0.05 | 0.03 | 0.04 | 0     | 0    | 0.01  | 0.02 | 0.02  | 0.02 |
| 10                | 0.95 | 0.05 | 0.03 | 0.04 | 0     | 0    | 0.01  | 0.01 | 0.02  | 0.02 |
| 11                | 0.95 | 0.05 | 0.03 | 0.04 | 0     | 0    | 0.01  | 0.01 | 0.02  | 0.02 |
| 12                | 0.95 | 0.04 | 0.02 | 0.04 | 0     | 0    | 0.01  | 0.01 | 0.02  | 0.02 |

**age=40 years, timing allo >6 months, cmv=others, donor=MRD, graft=PBSC, TBI=no TBI, In vivo Tcell depletion=yes,**

| Landmark time (y) | GRFS | se   | GF   | se   | AGVHD | se   | CGVHD | se   | Death | se   |
|-------------------|------|------|------|------|-------|------|-------|------|-------|------|
| 0                 | 0.77 | 0.06 | 0.09 | 0.05 | 0.01  | 0.01 | 0.03  | 0.02 | 0.1   | 0.04 |
| 1                 | 0.79 | 0.06 | 0.09 | 0.05 | 0.01  | 0.01 | 0.03  | 0.02 | 0.09  | 0.04 |
| 2                 | 0.81 | 0.06 | 0.07 | 0.05 | 0     | 0.01 | 0.03  | 0.03 | 0.08  | 0.04 |
| 3                 | 0.82 | 0.06 | 0.07 | 0.05 | 0     | 0    | 0.03  | 0.03 | 0.07  | 0.04 |
| 4                 | 0.87 | 0.06 | 0.05 | 0.04 | 0     | 0    | 0.03  | 0.03 | 0.05  | 0.04 |
| 5                 | 0.89 | 0.06 | 0.04 | 0.04 | 0     | 0    | 0.03  | 0.03 | 0.04  | 0.04 |
| 6                 | 0.91 | 0.06 | 0.03 | 0.04 | 0     | 0    | 0.02  | 0.02 | 0.04  | 0.03 |
| 7                 | 0.92 | 0.05 | 0.03 | 0.04 | 0     | 0    | 0.01  | 0.02 | 0.04  | 0.03 |
| 8                 | 0.92 | 0.05 | 0.03 | 0.04 | 0     | 0    | 0.01  | 0.02 | 0.03  | 0.03 |
| 9                 | 0.92 | 0.06 | 0.03 | 0.04 | 0     | 0    | 0.01  | 0.02 | 0.03  | 0.03 |
| 10                | 0.93 | 0.05 | 0.03 | 0.04 | 0     | 0    | 0.01  | 0.02 | 0.03  | 0.03 |
| 11                | 0.93 | 0.05 | 0.03 | 0.04 | 0     | 0    | 0.01  | 0.02 | 0.03  | 0.03 |
| 12                | 0.94 | 0.05 | 0.02 | 0.04 | 0     | 0    | 0.01  | 0.02 | 0.03  | 0.03 |

**age=50 years, timing allo >6 months, cmv=others, donor=MRD, graft=PBSC, TBI=no TBI, In vivo Tcell depletion=yes,**

| Landmark time (y) | GRFS | se   | GF  | se   | AGVHD | se   | CGVHD | se   | Death | se   |
|-------------------|------|------|-----|------|-------|------|-------|------|-------|------|
| 0                 | 0.71 | 0.07 | 0.1 | 0.05 | 0.01  | 0.01 | 0.04  | 0.03 | 0.14  | 0.05 |

|    |      |      |      |      |      |      |      |      |      |      |
|----|------|------|------|------|------|------|------|------|------|------|
| 1  | 0.73 | 0.07 | 0.1  | 0.05 | 0.01 | 0.01 | 0.04 | 0.03 | 0.12 | 0.05 |
| 2  | 0.75 | 0.08 | 0.08 | 0.05 | 0    | 0.01 | 0.05 | 0.03 | 0.12 | 0.06 |
| 3  | 0.77 | 0.08 | 0.08 | 0.05 | 0    | 0    | 0.05 | 0.03 | 0.1  | 0.05 |
| 4  | 0.83 | 0.08 | 0.05 | 0.05 | 0    | 0    | 0.04 | 0.04 | 0.08 | 0.05 |
| 5  | 0.85 | 0.07 | 0.04 | 0.04 | 0    | 0    | 0.04 | 0.04 | 0.06 | 0.05 |
| 6  | 0.88 | 0.07 | 0.04 | 0.04 | 0    | 0    | 0.03 | 0.03 | 0.05 | 0.05 |
| 7  | 0.89 | 0.07 | 0.04 | 0.04 | 0    | 0    | 0.02 | 0.03 | 0.05 | 0.05 |
| 8  | 0.9  | 0.07 | 0.04 | 0.04 | 0    | 0    | 0.02 | 0.03 | 0.05 | 0.04 |
| 9  | 0.9  | 0.07 | 0.04 | 0.05 | 0    | 0    | 0.02 | 0.03 | 0.05 | 0.05 |
| 10 | 0.91 | 0.07 | 0.03 | 0.04 | 0    | 0    | 0.01 | 0.03 | 0.04 | 0.04 |
| 11 | 0.91 | 0.06 | 0.03 | 0.04 | 0    | 0    | 0.01 | 0.03 | 0.04 | 0.04 |
| 12 | 0.92 | 0.06 | 0.03 | 0.04 | 0    | 0    | 0.01 | 0.03 | 0.04 | 0.04 |

**age=10 years, timing allo <6 months, cmv=others, donor=MRD, graft=PBSC, TBI=no TBI, In vivo Tcell depletion=yes,**

| Landmark time (y) | GRFS | se   | GF   | se   | AGVHD | se   | CGVHD | se   | Death | se   |
|-------------------|------|------|------|------|-------|------|-------|------|-------|------|
| 0                 | 0.88 | 0.05 | 0.06 | 0.04 | 0.01  | 0.01 | 0.02  | 0.02 | 0.03  | 0.02 |
| 1                 | 0.89 | 0.05 | 0.06 | 0.04 | 0.01  | 0.01 | 0.02  | 0.02 | 0.03  | 0.02 |
| 2                 | 0.9  | 0.05 | 0.05 | 0.04 | 0     | 0    | 0.03  | 0.02 | 0.03  | 0.02 |
| 3                 | 0.91 | 0.05 | 0.05 | 0.04 | 0     | 0    | 0.02  | 0.02 | 0.02  | 0.02 |
| 4                 | 0.93 | 0.05 | 0.03 | 0.04 | 0     | 0    | 0.02  | 0.02 | 0.02  | 0.02 |
| 5                 | 0.94 | 0.04 | 0.02 | 0.03 | 0     | 0    | 0.02  | 0.02 | 0.01  | 0.01 |
| 6                 | 0.95 | 0.04 | 0.02 | 0.03 | 0     | 0    | 0.02  | 0.02 | 0.01  | 0.01 |
| 7                 | 0.96 | 0.04 | 0.02 | 0.03 | 0     | 0    | 0.01  | 0.02 | 0.01  | 0.01 |
| 8                 | 0.96 | 0.04 | 0.02 | 0.03 | 0     | 0    | 0.01  | 0.02 | 0.01  | 0.01 |
| 9                 | 0.96 | 0.04 | 0.02 | 0.04 | 0     | 0    | 0.01  | 0.02 | 0.01  | 0.01 |
| 10                | 0.96 | 0.04 | 0.02 | 0.03 | 0     | 0    | 0.01  | 0.02 | 0.01  | 0.01 |
| 11                | 0.97 | 0.04 | 0.02 | 0.03 | 0     | 0    | 0.01  | 0.02 | 0.01  | 0.01 |
| 12                | 0.97 | 0.04 | 0.02 | 0.03 | 0     | 0    | 0.01  | 0.02 | 0.01  | 0.01 |

**age=20 years, timing allo <6 months, cmv=others, donor=MRD, graft=PBSC, TBI=no TBI, In vivo Tcell depletion=yes,**

| Landmark time (y) | GRFS | se   | GF   | se   | AGVHD | se   | CGVHD | se   | Death | se   |
|-------------------|------|------|------|------|-------|------|-------|------|-------|------|
| 0                 | 0.85 | 0.06 | 0.07 | 0.04 | 0.01  | 0.01 | 0.03  | 0.03 | 0.04  | 0.02 |
| 1                 | 0.86 | 0.06 | 0.07 | 0.04 | 0.01  | 0.01 | 0.03  | 0.03 | 0.04  | 0.02 |
| 2                 | 0.87 | 0.06 | 0.05 | 0.04 | 0     | 0    | 0.04  | 0.03 | 0.04  | 0.02 |
| 3                 | 0.88 | 0.06 | 0.05 | 0.04 | 0     | 0    | 0.04  | 0.03 | 0.03  | 0.02 |
| 4                 | 0.91 | 0.05 | 0.03 | 0.04 | 0     | 0    | 0.03  | 0.03 | 0.02  | 0.02 |
| 5                 | 0.92 | 0.05 | 0.03 | 0.04 | 0     | 0    | 0.03  | 0.03 | 0.02  | 0.02 |
| 6                 | 0.94 | 0.05 | 0.02 | 0.03 | 0     | 0    | 0.02  | 0.03 | 0.02  | 0.02 |
| 7                 | 0.95 | 0.05 | 0.02 | 0.04 | 0     | 0    | 0.01  | 0.03 | 0.01  | 0.02 |
| 8                 | 0.95 | 0.05 | 0.02 | 0.04 | 0     | 0    | 0.01  | 0.03 | 0.01  | 0.02 |
| 9                 | 0.95 | 0.05 | 0.03 | 0.04 | 0     | 0    | 0.01  | 0.03 | 0.01  | 0.02 |
| 10                | 0.96 | 0.04 | 0.02 | 0.03 | 0     | 0    | 0.01  | 0.02 | 0.01  | 0.02 |
| 11                | 0.96 | 0.04 | 0.02 | 0.03 | 0     | 0    | 0.01  | 0.02 | 0.01  | 0.02 |
| 12                | 0.96 | 0.04 | 0.02 | 0.03 | 0     | 0    | 0.01  | 0.02 | 0.01  | 0.02 |

**age=30 years, timing allo <6 months, cmv=others, donor=MRD, graft=PBSC, TBI=no TBI, In vivo Tcell depletion=yes,**

| Landmark time (y) | GRFS | se   | GF   | se   | AGVHD | se   | CGVHD | se   | Death | se   |
|-------------------|------|------|------|------|-------|------|-------|------|-------|------|
| 0                 | 0.8  | 0.06 | 0.07 | 0.05 | 0.01  | 0.01 | 0.05  | 0.04 | 0.06  | 0.03 |
| 1                 | 0.82 | 0.06 | 0.07 | 0.05 | 0.01  | 0.01 | 0.05  | 0.04 | 0.05  | 0.03 |
| 2                 | 0.84 | 0.07 | 0.06 | 0.05 | 0     | 0.01 | 0.05  | 0.04 | 0.05  | 0.03 |
| 3                 | 0.85 | 0.07 | 0.06 | 0.05 | 0     | 0    | 0.05  | 0.04 | 0.04  | 0.03 |
| 4                 | 0.88 | 0.06 | 0.04 | 0.04 | 0     | 0    | 0.04  | 0.04 | 0.03  | 0.03 |
| 5                 | 0.9  | 0.06 | 0.03 | 0.04 | 0     | 0    | 0.05  | 0.04 | 0.03  | 0.03 |
| 6                 | 0.92 | 0.06 | 0.03 | 0.04 | 0     | 0    | 0.03  | 0.04 | 0.02  | 0.02 |
| 7                 | 0.93 | 0.06 | 0.03 | 0.04 | 0     | 0    | 0.02  | 0.04 | 0.02  | 0.02 |
| 8                 | 0.93 | 0.06 | 0.03 | 0.04 | 0     | 0    | 0.02  | 0.04 | 0.02  | 0.02 |
| 9                 | 0.93 | 0.06 | 0.03 | 0.04 | 0     | 0    | 0.02  | 0.04 | 0.02  | 0.02 |
| 10                | 0.94 | 0.05 | 0.02 | 0.04 | 0     | 0    | 0.02  | 0.03 | 0.02  | 0.02 |
| 11                | 0.94 | 0.05 | 0.02 | 0.04 | 0     | 0    | 0.02  | 0.03 | 0.02  | 0.02 |
| 12                | 0.95 | 0.05 | 0.02 | 0.03 | 0     | 0    | 0.02  | 0.03 | 0.02  | 0.02 |

**age=40 years, timing allo <6 months, cmv=others, donor=MRD, graft=PBSC, TBI=no TBI, In vivo Tcell depletion=yes,**

| Landmark time (y) | GRFS | se   | GF   | se   | AGVHD | se   | CGVHD | se   | Death | se   |
|-------------------|------|------|------|------|-------|------|-------|------|-------|------|
| 0                 | 0.75 | 0.08 | 0.08 | 0.05 | 0.02  | 0.02 | 0.07  | 0.05 | 0.09  | 0.04 |
| 1                 | 0.76 | 0.08 | 0.08 | 0.05 | 0.01  | 0.02 | 0.07  | 0.05 | 0.08  | 0.04 |
| 2                 | 0.78 | 0.08 | 0.06 | 0.05 | 0     | 0.01 | 0.08  | 0.06 | 0.07  | 0.04 |
| 3                 | 0.8  | 0.08 | 0.06 | 0.05 | 0     | 0    | 0.07  | 0.06 | 0.06  | 0.04 |
| 4                 | 0.85 | 0.08 | 0.04 | 0.05 | 0     | 0    | 0.06  | 0.06 | 0.05  | 0.04 |
| 5                 | 0.86 | 0.08 | 0.03 | 0.04 | 0     | 0    | 0.07  | 0.06 | 0.04  | 0.04 |
| 6                 | 0.89 | 0.08 | 0.03 | 0.04 | 0     | 0    | 0.05  | 0.06 | 0.03  | 0.03 |
| 7                 | 0.91 | 0.07 | 0.03 | 0.04 | 0     | 0    | 0.03  | 0.05 | 0.03  | 0.03 |
| 8                 | 0.91 | 0.07 | 0.03 | 0.04 | 0     | 0    | 0.03  | 0.05 | 0.03  | 0.03 |
| 9                 | 0.91 | 0.07 | 0.03 | 0.04 | 0     | 0    | 0.03  | 0.05 | 0.03  | 0.03 |
| 10                | 0.92 | 0.07 | 0.03 | 0.04 | 0     | 0    | 0.02  | 0.05 | 0.03  | 0.03 |
| 11                | 0.93 | 0.07 | 0.03 | 0.04 | 0     | 0    | 0.02  | 0.05 | 0.02  | 0.03 |
| 12                | 0.93 | 0.07 | 0.02 | 0.04 | 0     | 0    | 0.02  | 0.05 | 0.02  | 0.03 |

**age=50 years, timing allo <6 months, cmv=others, donor=MRD, graft=PBSC, TBI=no TBI, In vivo Tcell depletion=yes,**

| Landmark time (y) | GRFS | se   | GF   | se   | AGVHD | se   | CGVHD | se   | Death | se   |
|-------------------|------|------|------|------|-------|------|-------|------|-------|------|
| 0                 | 0.68 | 0.1  | 0.09 | 0.05 | 0.03  | 0.02 | 0.09  | 0.07 | 0.12  | 0.05 |
| 1                 | 0.7  | 0.1  | 0.09 | 0.06 | 0.02  | 0.02 | 0.09  | 0.07 | 0.1   | 0.06 |
| 2                 | 0.72 | 0.11 | 0.07 | 0.06 | 0     | 0.01 | 0.11  | 0.08 | 0.1   | 0.06 |
| 3                 | 0.74 | 0.11 | 0.07 | 0.06 | 0     | 0    | 0.1   | 0.09 | 0.09  | 0.06 |
| 4                 | 0.8  | 0.11 | 0.05 | 0.05 | 0     | 0    | 0.09  | 0.09 | 0.07  | 0.06 |
| 5                 | 0.82 | 0.11 | 0.04 | 0.05 | 0     | 0    | 0.09  | 0.09 | 0.05  | 0.05 |
| 6                 | 0.85 | 0.11 | 0.03 | 0.05 | 0     | 0    | 0.07  | 0.09 | 0.05  | 0.05 |
| 7                 | 0.88 | 0.1  | 0.03 | 0.05 | 0     | 0    | 0.04  | 0.07 | 0.04  | 0.05 |
| 8                 | 0.88 | 0.1  | 0.03 | 0.05 | 0     | 0    | 0.04  | 0.07 | 0.04  | 0.05 |



|    |      |      |      |      |   |   |      |      |      |      |
|----|------|------|------|------|---|---|------|------|------|------|
| 9  | 0.88 | 0.1  | 0.04 | 0.05 | 0 | 0 | 0.04 | 0.08 | 0.04 | 0.05 |
| 10 | 0.9  | 0.09 | 0.03 | 0.05 | 0 | 0 | 0.03 | 0.07 | 0.04 | 0.05 |
| 11 | 0.9  | 0.09 | 0.03 | 0.05 | 0 | 0 | 0.03 | 0.07 | 0.03 | 0.05 |
| 12 | 0.91 | 0.09 | 0.02 | 0.05 | 0 | 0 | 0.03 | 0.07 | 0.03 | 0.05 |

**age=10 years, timing allo >6 months, cmv=D-/R-, donor=UD, graft=PBSC, TBI=no TBI, In vivo Tcell depletion=yes,**

| Landmark time (y) | GRFS | se   | GF   | se   | AGVHD | se   | CGVHD | se   | Death | se   |
|-------------------|------|------|------|------|-------|------|-------|------|-------|------|
| 0                 | 0.88 | 0.04 | 0.01 | 0.01 | 0.01  | 0.01 | 0.01  | 0.01 | 0.08  | 0.04 |
| 1                 | 0.89 | 0.04 | 0.01 | 0.01 | 0.01  | 0.01 | 0.01  | 0.01 | 0.07  | 0.04 |
| 2                 | 0.91 | 0.04 | 0.01 | 0.01 | 0     | 0.01 | 0.02  | 0.01 | 0.07  | 0.04 |
| 3                 | 0.92 | 0.04 | 0.01 | 0.01 | 0     | 0    | 0.01  | 0.01 | 0.06  | 0.04 |
| 4                 | 0.94 | 0.04 | 0.01 | 0.01 | 0     | 0    | 0.01  | 0.01 | 0.04  | 0.03 |
| 5                 | 0.95 | 0.03 | 0.01 | 0.01 | 0     | 0    | 0.01  | 0.01 | 0.03  | 0.03 |
| 6                 | 0.96 | 0.03 | 0    | 0.01 | 0     | 0    | 0.01  | 0.01 | 0.03  | 0.03 |
| 7                 | 0.96 | 0.03 | 0    | 0.01 | 0     | 0    | 0.01  | 0.01 | 0.03  | 0.03 |
| 8                 | 0.97 | 0.03 | 0    | 0.01 | 0     | 0    | 0.01  | 0.01 | 0.02  | 0.03 |
| 9                 | 0.96 | 0.03 | 0    | 0.01 | 0     | 0    | 0.01  | 0.01 | 0.03  | 0.03 |
| 10                | 0.97 | 0.03 | 0    | 0.01 | 0     | 0    | 0     | 0.01 | 0.02  | 0.03 |
| 11                | 0.97 | 0.03 | 0    | 0.01 | 0     | 0    | 0     | 0.01 | 0.02  | 0.03 |
| 12                | 0.97 | 0.03 | 0    | 0.01 | 0     | 0    | 0     | 0.01 | 0.02  | 0.03 |

**age=20 years, timing allo >6 months, cmv=D-/R-, donor=UD, graft=PBSC, TBI=no TBI, In vivo Tcell depletion=yes,**

| Landmark time (y) | GRFS | se   | GF   | se   | AGVHD | se   | CGVHD | se   | Death | se   |
|-------------------|------|------|------|------|-------|------|-------|------|-------|------|
| 0                 | 0.84 | 0.05 | 0.01 | 0.01 | 0.02  | 0.02 | 0.02  | 0.02 | 0.11  | 0.04 |
| 1                 | 0.85 | 0.05 | 0.01 | 0.01 | 0.02  | 0.02 | 0.02  | 0.02 | 0.1   | 0.04 |
| 2                 | 0.87 | 0.05 | 0.01 | 0.01 | 0     | 0.01 | 0.02  | 0.02 | 0.09  | 0.05 |
| 3                 | 0.89 | 0.05 | 0.01 | 0.01 | 0     | 0    | 0.02  | 0.02 | 0.08  | 0.05 |
| 4                 | 0.91 | 0.05 | 0.01 | 0.01 | 0     | 0    | 0.02  | 0.02 | 0.06  | 0.04 |
| 5                 | 0.93 | 0.04 | 0.01 | 0.01 | 0     | 0    | 0.02  | 0.02 | 0.05  | 0.04 |
| 6                 | 0.94 | 0.04 | 0.01 | 0.01 | 0     | 0    | 0.01  | 0.02 | 0.04  | 0.04 |
| 7                 | 0.95 | 0.04 | 0.01 | 0.01 | 0     | 0    | 0.01  | 0.01 | 0.04  | 0.04 |
| 8                 | 0.95 | 0.04 | 0.01 | 0.01 | 0     | 0    | 0.01  | 0.01 | 0.04  | 0.03 |
| 9                 | 0.95 | 0.04 | 0.01 | 0.01 | 0     | 0    | 0.01  | 0.01 | 0.04  | 0.04 |
| 10                | 0.96 | 0.04 | 0    | 0.01 | 0     | 0    | 0.01  | 0.01 | 0.03  | 0.03 |
| 11                | 0.96 | 0.04 | 0    | 0.01 | 0     | 0    | 0.01  | 0.01 | 0.03  | 0.03 |
| 12                | 0.96 | 0.04 | 0    | 0.01 | 0     | 0    | 0.01  | 0.01 | 0.03  | 0.03 |

**age=30 years, timing allo >6 months, cmv=D-/R-, donor=UD, graft=PBSC, TBI=no TBI, In vivo Tcell depletion=yes,**

| Landmark time (y) | GRFS | se   | GF   | se   | AGVHD | se   | CGVHD | se   | Death | se   |
|-------------------|------|------|------|------|-------|------|-------|------|-------|------|
| 0                 | 0.77 | 0.06 | 0.01 | 0.01 | 0.03  | 0.02 | 0.03  | 0.02 | 0.16  | 0.06 |
| 1                 | 0.8  | 0.06 | 0.01 | 0.01 | 0.02  | 0.02 | 0.03  | 0.02 | 0.14  | 0.06 |
| 2                 | 0.82 | 0.06 | 0.01 | 0.01 | 0     | 0.01 | 0.03  | 0.02 | 0.13  | 0.06 |
| 3                 | 0.84 | 0.06 | 0.01 | 0.01 | 0     | 0    | 0.03  | 0.02 | 0.12  | 0.06 |
| 4                 | 0.88 | 0.06 | 0.01 | 0.01 | 0     | 0    | 0.03  | 0.02 | 0.09  | 0.05 |

|    |      |      |      |      |   |   |      |      |      |      |
|----|------|------|------|------|---|---|------|------|------|------|
| 5  | 0.9  | 0.06 | 0.01 | 0.01 | 0 | 0 | 0.03 | 0.02 | 0.07 | 0.05 |
| 6  | 0.92 | 0.05 | 0.01 | 0.01 | 0 | 0 | 0.02 | 0.02 | 0.06 | 0.05 |
| 7  | 0.93 | 0.05 | 0.01 | 0.01 | 0 | 0 | 0.01 | 0.02 | 0.06 | 0.05 |
| 8  | 0.93 | 0.05 | 0.01 | 0.01 | 0 | 0 | 0.01 | 0.02 | 0.05 | 0.05 |
| 9  | 0.93 | 0.05 | 0.01 | 0.01 | 0 | 0 | 0.01 | 0.02 | 0.05 | 0.05 |
| 10 | 0.94 | 0.05 | 0.01 | 0.01 | 0 | 0 | 0.01 | 0.02 | 0.05 | 0.05 |
| 11 | 0.94 | 0.05 | 0.01 | 0.01 | 0 | 0 | 0.01 | 0.02 | 0.04 | 0.04 |
| 12 | 0.94 | 0.05 | 0    | 0.01 | 0 | 0 | 0.01 | 0.02 | 0.04 | 0.05 |

**age=40 years, timing allo >6 months, cmv=D-/R-, donor=UD, graft=PBSC, TBI=no TBI, In vivo Tcell depletion=yes,**

| Landmark time (y) | GRFS | se   | GF   | se   | AGVHD | se   | CGVHD | se   | Death | se   |
|-------------------|------|------|------|------|-------|------|-------|------|-------|------|
| 0                 | 0.69 | 0.08 | 0.02 | 0.01 | 0.04  | 0.03 | 0.04  | 0.03 | 0.22  | 0.07 |
| 1                 | 0.73 | 0.08 | 0.02 | 0.01 | 0.03  | 0.03 | 0.04  | 0.03 | 0.19  | 0.07 |
| 2                 | 0.75 | 0.08 | 0.01 | 0.01 | 0.01  | 0.02 | 0.04  | 0.03 | 0.19  | 0.08 |
| 3                 | 0.78 | 0.08 | 0.01 | 0.01 | 0     | 0    | 0.04  | 0.03 | 0.16  | 0.08 |
| 4                 | 0.83 | 0.08 | 0.01 | 0.01 | 0     | 0    | 0.04  | 0.03 | 0.12  | 0.07 |
| 5                 | 0.86 | 0.08 | 0.01 | 0.01 | 0     | 0    | 0.04  | 0.03 | 0.1   | 0.07 |
| 6                 | 0.88 | 0.07 | 0.01 | 0.01 | 0     | 0    | 0.03  | 0.03 | 0.09  | 0.07 |
| 7                 | 0.9  | 0.07 | 0.01 | 0.01 | 0     | 0    | 0.02  | 0.03 | 0.08  | 0.07 |
| 8                 | 0.9  | 0.07 | 0.01 | 0.01 | 0     | 0    | 0.02  | 0.03 | 0.07  | 0.06 |
| 9                 | 0.9  | 0.07 | 0.01 | 0.01 | 0     | 0    | 0.02  | 0.03 | 0.07  | 0.07 |
| 10                | 0.91 | 0.07 | 0.01 | 0.01 | 0     | 0    | 0.01  | 0.02 | 0.07  | 0.06 |
| 11                | 0.92 | 0.07 | 0.01 | 0.01 | 0     | 0    | 0.01  | 0.02 | 0.06  | 0.06 |
| 12                | 0.92 | 0.07 | 0    | 0.01 | 0     | 0    | 0.01  | 0.02 | 0.06  | 0.06 |

**age=50 years, timing allo >6 months, cmv=D-/R-, donor=UD, graft=PBSC, TBI=no TBI, In vivo Tcell depletion=yes,**

| Landmark time (y) | GRFS | se   | GF   | se   | AGVHD | se   | CGVHD | se   | Death | se   |
|-------------------|------|------|------|------|-------|------|-------|------|-------|------|
| 0                 | 0.59 | 0.1  | 0.02 | 0.01 | 0.05  | 0.04 | 0.05  | 0.04 | 0.29  | 0.09 |
| 1                 | 0.63 | 0.1  | 0.02 | 0.01 | 0.04  | 0.04 | 0.05  | 0.04 | 0.26  | 0.1  |
| 2                 | 0.66 | 0.11 | 0.01 | 0.01 | 0.01  | 0.02 | 0.06  | 0.04 | 0.25  | 0.11 |
| 3                 | 0.7  | 0.11 | 0.01 | 0.02 | 0     | 0    | 0.06  | 0.05 | 0.23  | 0.11 |
| 4                 | 0.77 | 0.11 | 0.01 | 0.01 | 0     | 0    | 0.05  | 0.05 | 0.17  | 0.1  |
| 5                 | 0.8  | 0.11 | 0.01 | 0.01 | 0     | 0    | 0.06  | 0.05 | 0.14  | 0.1  |
| 6                 | 0.83 | 0.11 | 0.01 | 0.01 | 0     | 0    | 0.04  | 0.05 | 0.12  | 0.1  |
| 7                 | 0.86 | 0.1  | 0.01 | 0.01 | 0     | 0    | 0.02  | 0.04 | 0.11  | 0.1  |
| 8                 | 0.87 | 0.1  | 0.01 | 0.01 | 0     | 0    | 0.02  | 0.04 | 0.1   | 0.09 |
| 9                 | 0.86 | 0.1  | 0.01 | 0.01 | 0     | 0    | 0.02  | 0.04 | 0.11  | 0.1  |
| 10                | 0.88 | 0.1  | 0.01 | 0.01 | 0     | 0    | 0.02  | 0.04 | 0.1   | 0.09 |
| 11                | 0.89 | 0.1  | 0.01 | 0.01 | 0     | 0    | 0.02  | 0.04 | 0.09  | 0.09 |
| 12                | 0.89 | 0.1  | 0.01 | 0.01 | 0     | 0    | 0.02  | 0.04 | 0.09  | 0.09 |

**age=10 years, timing allo <6 months, cmv=D-/R-, donor=UD, graft=PBSC, TBI=no TBI, In vivo Tcell depletion=yes,**

| Landmark time (y) | GRFS | se   | GF   | se   | AGVHD | se   | CGVHD | se   | Death | se   |
|-------------------|------|------|------|------|-------|------|-------|------|-------|------|
| 0                 | 0.86 | 0.05 | 0.01 | 0.01 | 0.03  | 0.03 | 0.03  | 0.03 | 0.07  | 0.03 |

|    |      |      |      |      |      |      |      |      |      |      |
|----|------|------|------|------|------|------|------|------|------|------|
| 1  | 0.88 | 0.05 | 0.01 | 0.01 | 0.02 | 0.03 | 0.03 | 0.03 | 0.06 | 0.03 |
| 2  | 0.9  | 0.05 | 0.01 | 0.01 | 0    | 0.01 | 0.03 | 0.03 | 0.06 | 0.04 |
| 3  | 0.91 | 0.05 | 0.01 | 0.01 | 0    | 0    | 0.03 | 0.03 | 0.05 | 0.04 |
| 4  | 0.93 | 0.05 | 0.01 | 0.01 | 0    | 0    | 0.03 | 0.03 | 0.04 | 0.03 |
| 5  | 0.94 | 0.04 | 0    | 0.01 | 0    | 0    | 0.03 | 0.03 | 0.03 | 0.03 |
| 6  | 0.95 | 0.04 | 0    | 0.01 | 0    | 0    | 0.02 | 0.03 | 0.02 | 0.03 |
| 7  | 0.96 | 0.04 | 0    | 0.01 | 0    | 0    | 0.01 | 0.03 | 0.02 | 0.03 |
| 8  | 0.96 | 0.04 | 0    | 0.01 | 0    | 0    | 0.01 | 0.03 | 0.02 | 0.03 |
| 9  | 0.96 | 0.04 | 0    | 0.01 | 0    | 0    | 0.01 | 0.03 | 0.02 | 0.03 |
| 10 | 0.97 | 0.04 | 0    | 0.01 | 0    | 0    | 0.01 | 0.02 | 0.02 | 0.03 |
| 11 | 0.97 | 0.04 | 0    | 0.01 | 0    | 0    | 0.01 | 0.02 | 0.02 | 0.03 |
| 12 | 0.97 | 0.04 | 0    | 0.01 | 0    | 0    | 0.01 | 0.02 | 0.02 | 0.03 |

**age=20 years, timing allo <6 months, cmv=D-/R-, donor=UD, graft=PBSC, TBI=no TBI, In vivo Tcell depletion=yes,**

| Landmark time (y) | GRFS | se   | GF   | se   | AGVHD | se   | CGVHD | se   | Death | se   |
|-------------------|------|------|------|------|-------|------|-------|------|-------|------|
| 0                 | 0.81 | 0.07 | 0.01 | 0.01 | 0.04  | 0.03 | 0.04  | 0.04 | 0.1   | 0.05 |
| 1                 | 0.83 | 0.07 | 0.01 | 0.01 | 0.03  | 0.03 | 0.04  | 0.04 | 0.08  | 0.05 |
| 2                 | 0.85 | 0.07 | 0.01 | 0.01 | 0.01  | 0.02 | 0.05  | 0.04 | 0.08  | 0.05 |
| 3                 | 0.87 | 0.06 | 0.01 | 0.01 | 0     | 0    | 0.05  | 0.04 | 0.07  | 0.05 |
| 4                 | 0.9  | 0.06 | 0.01 | 0.01 | 0     | 0    | 0.04  | 0.04 | 0.05  | 0.04 |
| 5                 | 0.91 | 0.06 | 0.01 | 0.01 | 0     | 0    | 0.04  | 0.04 | 0.04  | 0.04 |
| 6                 | 0.93 | 0.06 | 0    | 0.01 | 0     | 0    | 0.03  | 0.04 | 0.04  | 0.04 |
| 7                 | 0.94 | 0.05 | 0    | 0.01 | 0     | 0    | 0.02  | 0.03 | 0.03  | 0.04 |
| 8                 | 0.95 | 0.05 | 0    | 0.01 | 0     | 0    | 0.02  | 0.03 | 0.03  | 0.04 |
| 9                 | 0.95 | 0.05 | 0    | 0.01 | 0     | 0    | 0.02  | 0.03 | 0.03  | 0.04 |
| 10                | 0.95 | 0.05 | 0    | 0.01 | 0     | 0    | 0.01  | 0.03 | 0.03  | 0.04 |
| 11                | 0.96 | 0.05 | 0    | 0.01 | 0     | 0    | 0.01  | 0.03 | 0.03  | 0.04 |
| 12                | 0.96 | 0.05 | 0    | 0.01 | 0     | 0    | 0.01  | 0.03 | 0.03  | 0.04 |

**age=30 years, timing allo <6 months, cmv=D-/R-, donor=UD, graft=PBSC, TBI=no TBI, In vivo Tcell depletion=yes,**

| Landmark time (y) | GRFS | se   | GF   | se   | AGVHD | se   | CGVHD | se   | Death | se   |
|-------------------|------|------|------|------|-------|------|-------|------|-------|------|
| 0                 | 0.74 | 0.08 | 0.01 | 0.01 | 0.05  | 0.05 | 0.06  | 0.05 | 0.13  | 0.06 |
| 1                 | 0.77 | 0.09 | 0.01 | 0.01 | 0.04  | 0.05 | 0.06  | 0.05 | 0.12  | 0.06 |
| 2                 | 0.8  | 0.09 | 0.01 | 0.01 | 0.01  | 0.02 | 0.07  | 0.06 | 0.11  | 0.07 |
| 3                 | 0.82 | 0.09 | 0.01 | 0.01 | 0     | 0    | 0.07  | 0.06 | 0.1   | 0.07 |
| 4                 | 0.86 | 0.08 | 0.01 | 0.01 | 0     | 0    | 0.06  | 0.06 | 0.07  | 0.06 |
| 5                 | 0.88 | 0.08 | 0.01 | 0.01 | 0     | 0    | 0.06  | 0.06 | 0.06  | 0.06 |
| 6                 | 0.9  | 0.08 | 0.01 | 0.01 | 0     | 0    | 0.04  | 0.06 | 0.05  | 0.06 |
| 7                 | 0.92 | 0.07 | 0.01 | 0.01 | 0     | 0    | 0.03  | 0.05 | 0.05  | 0.05 |
| 8                 | 0.92 | 0.07 | 0.01 | 0.01 | 0     | 0    | 0.03  | 0.05 | 0.04  | 0.05 |
| 9                 | 0.92 | 0.07 | 0.01 | 0.01 | 0     | 0    | 0.03  | 0.05 | 0.04  | 0.05 |
| 10                | 0.93 | 0.07 | 0    | 0.01 | 0     | 0    | 0.02  | 0.04 | 0.04  | 0.05 |
| 11                | 0.94 | 0.07 | 0    | 0.01 | 0     | 0    | 0.02  | 0.04 | 0.04  | 0.05 |
| 12                | 0.94 | 0.07 | 0    | 0.01 | 0     | 0    | 0.02  | 0.05 | 0.04  | 0.05 |

**age=40 years, timing allo <6 months, cmv=D-/R-, donor=UD, graft=PBSC, TBI=no TBI, In vivo Tcell depletion=yes,**

| Landmark time (y) | GRFS | se   | GF   | se   | AGVHD | se   | CGVHD | se   | Death | se   |
|-------------------|------|------|------|------|-------|------|-------|------|-------|------|
| 0                 | 0.65 | 0.11 | 0.01 | 0.01 | 0.07  | 0.06 | 0.08  | 0.07 | 0.18  | 0.08 |
| 1                 | 0.68 | 0.11 | 0.01 | 0.01 | 0.06  | 0.06 | 0.08  | 0.07 | 0.16  | 0.09 |
| 2                 | 0.72 | 0.12 | 0.01 | 0.01 | 0.01  | 0.03 | 0.1   | 0.08 | 0.16  | 0.09 |
| 3                 | 0.75 | 0.12 | 0.01 | 0.01 | 0     | 0    | 0.09  | 0.08 | 0.14  | 0.09 |
| 4                 | 0.8  | 0.12 | 0.01 | 0.01 | 0     | 0    | 0.08  | 0.09 | 0.1   | 0.09 |
| 5                 | 0.83 | 0.12 | 0.01 | 0.01 | 0     | 0    | 0.09  | 0.09 | 0.08  | 0.08 |
| 6                 | 0.86 | 0.11 | 0.01 | 0.01 | 0     | 0    | 0.06  | 0.09 | 0.07  | 0.08 |
| 7                 | 0.89 | 0.1  | 0.01 | 0.01 | 0     | 0    | 0.04  | 0.07 | 0.07  | 0.08 |
| 8                 | 0.89 | 0.1  | 0.01 | 0.01 | 0     | 0    | 0.04  | 0.07 | 0.06  | 0.08 |
| 9                 | 0.89 | 0.11 | 0.01 | 0.01 | 0     | 0    | 0.04  | 0.07 | 0.06  | 0.08 |
| 10                | 0.91 | 0.1  | 0.01 | 0.01 | 0     | 0    | 0.03  | 0.07 | 0.06  | 0.08 |
| 11                | 0.91 | 0.1  | 0.01 | 0.01 | 0     | 0    | 0.03  | 0.07 | 0.05  | 0.07 |
| 12                | 0.91 | 0.1  | 0    | 0.01 | 0     | 0    | 0.03  | 0.07 | 0.05  | 0.08 |

**age=50 years, timing allo <6 months, cmv=D-/R-, donor=UD, graft=PBSC, TBI=no TBI, In vivo Tcell depletion=yes,**

| Landmark time (y) | GRFS | se   | GF   | se   | AGVHD | se   | CGVHD | se   | Death | se   |
|-------------------|------|------|------|------|-------|------|-------|------|-------|------|
| 0                 | 0.54 | 0.14 | 0.01 | 0.01 | 0.1   | 0.09 | 0.1   | 0.09 | 0.24  | 0.11 |
| 1                 | 0.58 | 0.15 | 0.01 | 0.01 | 0.08  | 0.09 | 0.11  | 0.1  | 0.21  | 0.12 |
| 2                 | 0.62 | 0.16 | 0.01 | 0.02 | 0.02  | 0.05 | 0.13  | 0.11 | 0.22  | 0.13 |
| 3                 | 0.66 | 0.16 | 0.01 | 0.02 | 0     | 0    | 0.13  | 0.12 | 0.19  | 0.13 |
| 4                 | 0.73 | 0.17 | 0.01 | 0.02 | 0     | 0    | 0.12  | 0.13 | 0.14  | 0.13 |
| 5                 | 0.76 | 0.17 | 0.01 | 0.01 | 0     | 0    | 0.12  | 0.13 | 0.11  | 0.12 |
| 6                 | 0.8  | 0.16 | 0.01 | 0.01 | 0     | 0    | 0.09  | 0.13 | 0.1   | 0.12 |
| 7                 | 0.84 | 0.15 | 0.01 | 0.01 | 0     | 0    | 0.06  | 0.11 | 0.1   | 0.12 |
| 8                 | 0.85 | 0.15 | 0.01 | 0.01 | 0     | 0    | 0.06  | 0.11 | 0.09  | 0.11 |
| 9                 | 0.85 | 0.15 | 0.01 | 0.02 | 0     | 0    | 0.06  | 0.11 | 0.09  | 0.12 |
| 10                | 0.87 | 0.15 | 0.01 | 0.01 | 0     | 0    | 0.04  | 0.1  | 0.08  | 0.11 |
| 11                | 0.88 | 0.14 | 0.01 | 0.01 | 0     | 0    | 0.04  | 0.1  | 0.07  | 0.11 |
| 12                | 0.88 | 0.15 | 0    | 0.01 | 0     | 0    | 0.04  | 0.1  | 0.08  | 0.11 |

**age=10 years, timing allo >6 months, cmv=others, donor=UD, graft=PBSC, TBI=no TBI, In vivo Tcell depletion=yes,**

| Landmark time (y) | GRFS | se   | GF   | se   | AGVHD | se   | CGVHD | se   | Death | se   |
|-------------------|------|------|------|------|-------|------|-------|------|-------|------|
| 0                 | 0.84 | 0.05 | 0.05 | 0.04 | 0.03  | 0.03 | 0.01  | 0.01 | 0.06  | 0.03 |
| 1                 | 0.86 | 0.05 | 0.05 | 0.04 | 0.02  | 0.02 | 0.01  | 0.01 | 0.06  | 0.03 |
| 2                 | 0.89 | 0.05 | 0.04 | 0.04 | 0     | 0.01 | 0.01  | 0.01 | 0.05  | 0.03 |
| 3                 | 0.9  | 0.05 | 0.04 | 0.04 | 0     | 0    | 0.01  | 0.01 | 0.05  | 0.03 |
| 4                 | 0.93 | 0.04 | 0.03 | 0.03 | 0     | 0    | 0.01  | 0.01 | 0.03  | 0.03 |
| 5                 | 0.94 | 0.04 | 0.02 | 0.03 | 0     | 0    | 0.01  | 0.01 | 0.03  | 0.03 |
| 6                 | 0.95 | 0.04 | 0.02 | 0.03 | 0     | 0    | 0.01  | 0.01 | 0.02  | 0.03 |
| 7                 | 0.95 | 0.04 | 0.02 | 0.03 | 0     | 0    | 0     | 0.01 | 0.02  | 0.02 |
| 8                 | 0.96 | 0.04 | 0.02 | 0.03 | 0     | 0    | 0     | 0.01 | 0.02  | 0.02 |

|    |      |      |      |      |   |   |   |      |      |      |
|----|------|------|------|------|---|---|---|------|------|------|
| 9  | 0.95 | 0.04 | 0.02 | 0.03 | 0 | 0 | 0 | 0.01 | 0.02 | 0.02 |
| 10 | 0.96 | 0.04 | 0.02 | 0.03 | 0 | 0 | 0 | 0.01 | 0.02 | 0.02 |
| 11 | 0.96 | 0.04 | 0.02 | 0.03 | 0 | 0 | 0 | 0.01 | 0.02 | 0.02 |
| 12 | 0.96 | 0.04 | 0.01 | 0.03 | 0 | 0 | 0 | 0.01 | 0.02 | 0.02 |

**age=20 years, timing allo >6 months, cmv=others, donor=UD, graft=PBSC, TBI=no TBI, In vivo Tcell depletion=yes,**

| Landmark time (y) | GRFS | se   | GF   | se   | AGVHD | se   | CGVHD | se   | Death | se   |
|-------------------|------|------|------|------|-------|------|-------|------|-------|------|
| 0                 | 0.8  | 0.06 | 0.06 | 0.04 | 0.04  | 0.03 | 0.01  | 0.01 | 0.09  | 0.04 |
| 1                 | 0.82 | 0.06 | 0.06 | 0.04 | 0.03  | 0.03 | 0.01  | 0.01 | 0.08  | 0.04 |
| 2                 | 0.85 | 0.06 | 0.05 | 0.04 | 0.01  | 0.02 | 0.02  | 0.01 | 0.08  | 0.04 |
| 3                 | 0.87 | 0.05 | 0.05 | 0.04 | 0     | 0    | 0.02  | 0.02 | 0.07  | 0.04 |
| 4                 | 0.9  | 0.05 | 0.03 | 0.03 | 0     | 0    | 0.01  | 0.02 | 0.05  | 0.04 |
| 5                 | 0.92 | 0.05 | 0.03 | 0.03 | 0     | 0    | 0.01  | 0.02 | 0.04  | 0.03 |
| 6                 | 0.93 | 0.05 | 0.02 | 0.03 | 0     | 0    | 0.01  | 0.01 | 0.03  | 0.03 |
| 7                 | 0.94 | 0.04 | 0.02 | 0.03 | 0     | 0    | 0.01  | 0.01 | 0.03  | 0.03 |
| 8                 | 0.94 | 0.04 | 0.02 | 0.03 | 0     | 0    | 0.01  | 0.01 | 0.03  | 0.03 |
| 9                 | 0.94 | 0.05 | 0.02 | 0.03 | 0     | 0    | 0.01  | 0.01 | 0.03  | 0.03 |
| 10                | 0.95 | 0.04 | 0.02 | 0.03 | 0     | 0    | 0     | 0.01 | 0.03  | 0.03 |
| 11                | 0.95 | 0.04 | 0.02 | 0.03 | 0     | 0    | 0     | 0.01 | 0.02  | 0.03 |
| 12                | 0.95 | 0.04 | 0.02 | 0.03 | 0     | 0    | 0     | 0.01 | 0.02  | 0.03 |

**age=30 years, timing allo >6 months, cmv=others, donor=UD, graft=PBSC, TBI=no TBI, In vivo Tcell depletion=yes,**

| Landmark time (y) | GRFS | se   | GF   | se   | AGVHD | se   | CGVHD | se   | Death | se   |
|-------------------|------|------|------|------|-------|------|-------|------|-------|------|
| 0                 | 0.74 | 0.06 | 0.06 | 0.04 | 0.05  | 0.04 | 0.02  | 0.02 | 0.13  | 0.05 |
| 1                 | 0.76 | 0.06 | 0.06 | 0.04 | 0.04  | 0.04 | 0.02  | 0.02 | 0.11  | 0.05 |
| 2                 | 0.81 | 0.06 | 0.05 | 0.04 | 0.01  | 0.02 | 0.02  | 0.02 | 0.11  | 0.05 |
| 3                 | 0.83 | 0.06 | 0.05 | 0.04 | 0     | 0    | 0.02  | 0.02 | 0.1   | 0.05 |
| 4                 | 0.87 | 0.06 | 0.03 | 0.03 | 0     | 0    | 0.02  | 0.02 | 0.07  | 0.05 |
| 5                 | 0.89 | 0.06 | 0.03 | 0.03 | 0     | 0    | 0.02  | 0.02 | 0.06  | 0.04 |
| 6                 | 0.91 | 0.05 | 0.02 | 0.03 | 0     | 0    | 0.02  | 0.02 | 0.05  | 0.04 |
| 7                 | 0.92 | 0.05 | 0.03 | 0.03 | 0     | 0    | 0.01  | 0.02 | 0.05  | 0.04 |
| 8                 | 0.92 | 0.05 | 0.03 | 0.03 | 0     | 0    | 0.01  | 0.02 | 0.04  | 0.04 |
| 9                 | 0.92 | 0.05 | 0.03 | 0.03 | 0     | 0    | 0.01  | 0.02 | 0.04  | 0.04 |
| 10                | 0.93 | 0.05 | 0.02 | 0.03 | 0     | 0    | 0.01  | 0.01 | 0.04  | 0.04 |
| 11                | 0.94 | 0.05 | 0.02 | 0.03 | 0     | 0    | 0.01  | 0.01 | 0.03  | 0.04 |
| 12                | 0.94 | 0.05 | 0.02 | 0.03 | 0     | 0    | 0.01  | 0.01 | 0.04  | 0.04 |

**age=40 years, timing allo >6 months, cmv=others, donor=UD, graft=PBSC, TBI=no TBI, In vivo Tcell depletion=yes,**

| Landmark time (y) | GRFS | se   | GF   | se   | AGVHD | se   | CGVHD | se   | Death | se   |
|-------------------|------|------|------|------|-------|------|-------|------|-------|------|
| 0                 | 0.66 | 0.07 | 0.07 | 0.04 | 0.07  | 0.04 | 0.03  | 0.02 | 0.17  | 0.06 |
| 1                 | 0.69 | 0.07 | 0.07 | 0.04 | 0.06  | 0.04 | 0.03  | 0.02 | 0.15  | 0.06 |
| 2                 | 0.74 | 0.07 | 0.06 | 0.04 | 0.01  | 0.02 | 0.03  | 0.02 | 0.15  | 0.06 |
| 3                 | 0.77 | 0.07 | 0.06 | 0.04 | 0     | 0    | 0.03  | 0.03 | 0.13  | 0.06 |
| 4                 | 0.83 | 0.07 | 0.04 | 0.04 | 0     | 0    | 0.03  | 0.03 | 0.1   | 0.06 |

|    |      |      |      |      |   |   |      |      |      |      |
|----|------|------|------|------|---|---|------|------|------|------|
| 5  | 0.86 | 0.07 | 0.03 | 0.03 | 0 | 0 | 0.03 | 0.03 | 0.08 | 0.06 |
| 6  | 0.88 | 0.07 | 0.03 | 0.03 | 0 | 0 | 0.02 | 0.03 | 0.07 | 0.05 |
| 7  | 0.89 | 0.06 | 0.03 | 0.03 | 0 | 0 | 0.01 | 0.02 | 0.07 | 0.05 |
| 8  | 0.9  | 0.06 | 0.03 | 0.03 | 0 | 0 | 0.01 | 0.02 | 0.06 | 0.05 |
| 9  | 0.9  | 0.07 | 0.03 | 0.04 | 0 | 0 | 0.01 | 0.02 | 0.06 | 0.05 |
| 10 | 0.91 | 0.06 | 0.03 | 0.03 | 0 | 0 | 0.01 | 0.02 | 0.06 | 0.05 |
| 11 | 0.91 | 0.06 | 0.03 | 0.03 | 0 | 0 | 0.01 | 0.02 | 0.05 | 0.05 |
| 12 | 0.92 | 0.06 | 0.02 | 0.03 | 0 | 0 | 0.01 | 0.02 | 0.05 | 0.05 |

**age=50 years, timing allo >6 months, cmv=others, donor=UD, graft=PBSC, TBI=no TBI, In vivo Tcell depletion=yes,**

| Landmark time (y) | GRFS | se   | GF   | se   | AGVHD | se   | CGVHD | se   | Death | se   |
|-------------------|------|------|------|------|-------|------|-------|------|-------|------|
| 0                 | 0.56 | 0.08 | 0.07 | 0.04 | 0.1   | 0.06 | 0.04  | 0.03 | 0.23  | 0.07 |
| 1                 | 0.6  | 0.09 | 0.07 | 0.04 | 0.08  | 0.06 | 0.04  | 0.03 | 0.21  | 0.07 |
| 2                 | 0.67 | 0.09 | 0.06 | 0.04 | 0.02  | 0.03 | 0.05  | 0.03 | 0.21  | 0.08 |
| 3                 | 0.7  | 0.09 | 0.06 | 0.04 | 0     | 0    | 0.05  | 0.03 | 0.19  | 0.08 |
| 4                 | 0.77 | 0.09 | 0.04 | 0.04 | 0     | 0    | 0.04  | 0.04 | 0.14  | 0.08 |
| 5                 | 0.81 | 0.09 | 0.03 | 0.04 | 0     | 0    | 0.04  | 0.04 | 0.11  | 0.08 |
| 6                 | 0.84 | 0.09 | 0.03 | 0.04 | 0     | 0    | 0.03  | 0.04 | 0.1   | 0.08 |
| 7                 | 0.86 | 0.09 | 0.03 | 0.04 | 0     | 0    | 0.02  | 0.03 | 0.09  | 0.07 |
| 8                 | 0.86 | 0.08 | 0.03 | 0.04 | 0     | 0    | 0.02  | 0.03 | 0.09  | 0.07 |
| 9                 | 0.86 | 0.09 | 0.03 | 0.04 | 0     | 0    | 0.02  | 0.03 | 0.09  | 0.07 |
| 10                | 0.88 | 0.08 | 0.03 | 0.04 | 0     | 0    | 0.02  | 0.03 | 0.08  | 0.07 |
| 11                | 0.89 | 0.08 | 0.03 | 0.04 | 0     | 0    | 0.02  | 0.03 | 0.07  | 0.07 |
| 12                | 0.89 | 0.08 | 0.02 | 0.04 | 0     | 0    | 0.02  | 0.03 | 0.07  | 0.07 |

**age=10 years, timing allo <6 months, cmv=others, donor=UD, graft=PBSC, TBI=no TBI, In vivo Tcell depletion=yes,**

| Landmark time (y) | GRFS | se   | GF   | se   | AGVHD | se   | CGVHD | se   | Death | se   |
|-------------------|------|------|------|------|-------|------|-------|------|-------|------|
| 0                 | 0.82 | 0.06 | 0.05 | 0.03 | 0.05  | 0.04 | 0.02  | 0.02 | 0.05  | 0.03 |
| 1                 | 0.84 | 0.06 | 0.05 | 0.04 | 0.04  | 0.04 | 0.02  | 0.02 | 0.05  | 0.03 |
| 2                 | 0.88 | 0.06 | 0.04 | 0.04 | 0.01  | 0.02 | 0.03  | 0.03 | 0.05  | 0.03 |
| 3                 | 0.89 | 0.05 | 0.04 | 0.04 | 0     | 0    | 0.03  | 0.03 | 0.04  | 0.03 |
| 4                 | 0.92 | 0.05 | 0.03 | 0.03 | 0     | 0    | 0.02  | 0.03 | 0.03  | 0.03 |
| 5                 | 0.93 | 0.05 | 0.02 | 0.03 | 0     | 0    | 0.02  | 0.03 | 0.02  | 0.03 |
| 6                 | 0.94 | 0.04 | 0.02 | 0.03 | 0     | 0    | 0.02  | 0.02 | 0.02  | 0.02 |
| 7                 | 0.95 | 0.04 | 0.02 | 0.03 | 0     | 0    | 0.01  | 0.02 | 0.02  | 0.02 |
| 8                 | 0.95 | 0.04 | 0.02 | 0.03 | 0     | 0    | 0.01  | 0.02 | 0.02  | 0.02 |
| 9                 | 0.95 | 0.04 | 0.02 | 0.03 | 0     | 0    | 0.01  | 0.02 | 0.02  | 0.02 |
| 10                | 0.96 | 0.04 | 0.02 | 0.03 | 0     | 0    | 0.01  | 0.02 | 0.02  | 0.02 |
| 11                | 0.96 | 0.04 | 0.02 | 0.03 | 0     | 0    | 0.01  | 0.02 | 0.01  | 0.02 |
| 12                | 0.96 | 0.04 | 0.01 | 0.03 | 0     | 0    | 0.01  | 0.02 | 0.01  | 0.02 |

**age=20 years, timing allo <6 months, cmv=others, donor=UD, graft=PBSC, TBI=no TBI, In vivo Tcell depletion=yes,**

| Landmark time (y) | GRFS | se   | GF   | se   | AGVHD | se   | CGVHD | se   | Death | se   |
|-------------------|------|------|------|------|-------|------|-------|------|-------|------|
| 0                 | 0.77 | 0.07 | 0.05 | 0.04 | 0.07  | 0.05 | 0.03  | 0.03 | 0.08  | 0.04 |

|    |      |      |      |      |      |      |      |      |      |      |
|----|------|------|------|------|------|------|------|------|------|------|
| 1  | 0.79 | 0.07 | 0.05 | 0.04 | 0.06 | 0.05 | 0.03 | 0.03 | 0.07 | 0.04 |
| 2  | 0.84 | 0.07 | 0.04 | 0.04 | 0.01 | 0.03 | 0.04 | 0.03 | 0.07 | 0.04 |
| 3  | 0.86 | 0.06 | 0.04 | 0.04 | 0    | 0    | 0.04 | 0.03 | 0.06 | 0.04 |
| 4  | 0.9  | 0.06 | 0.03 | 0.04 | 0    | 0    | 0.03 | 0.03 | 0.04 | 0.04 |
| 5  | 0.91 | 0.06 | 0.02 | 0.03 | 0    | 0    | 0.03 | 0.03 | 0.03 | 0.03 |
| 6  | 0.93 | 0.05 | 0.02 | 0.03 | 0    | 0    | 0.02 | 0.03 | 0.03 | 0.03 |
| 7  | 0.94 | 0.05 | 0.02 | 0.03 | 0    | 0    | 0.01 | 0.03 | 0.03 | 0.03 |
| 8  | 0.94 | 0.05 | 0.02 | 0.03 | 0    | 0    | 0.01 | 0.03 | 0.03 | 0.03 |
| 9  | 0.94 | 0.05 | 0.02 | 0.03 | 0    | 0    | 0.01 | 0.03 | 0.03 | 0.03 |
| 10 | 0.95 | 0.05 | 0.02 | 0.03 | 0    | 0    | 0.01 | 0.02 | 0.02 | 0.03 |
| 11 | 0.95 | 0.05 | 0.02 | 0.03 | 0    | 0    | 0.01 | 0.02 | 0.02 | 0.03 |
| 12 | 0.95 | 0.05 | 0.02 | 0.03 | 0    | 0    | 0.01 | 0.02 | 0.02 | 0.03 |

**age=30 years, timing allo <6 months, cmv=others, donor=UD, graft=PBSC, TBI=no TBI, In vivo Tcell depletion=yes,**

| Landmark time (y) | GRFS | se   | GF   | se   | AGVHD | se   | CGVHD | se   | Death | se   |
|-------------------|------|------|------|------|-------|------|-------|------|-------|------|
| 0                 | 0.7  | 0.09 | 0.06 | 0.04 | 0.1   | 0.07 | 0.04  | 0.04 | 0.1   | 0.05 |
| 1                 | 0.73 | 0.09 | 0.06 | 0.04 | 0.08  | 0.07 | 0.05  | 0.04 | 0.09  | 0.05 |
| 2                 | 0.79 | 0.08 | 0.05 | 0.04 | 0.01  | 0.04 | 0.06  | 0.04 | 0.09  | 0.05 |
| 3                 | 0.82 | 0.08 | 0.05 | 0.04 | 0     | 0    | 0.05  | 0.05 | 0.08  | 0.05 |
| 4                 | 0.86 | 0.08 | 0.03 | 0.04 | 0     | 0    | 0.05  | 0.05 | 0.06  | 0.05 |
| 5                 | 0.88 | 0.07 | 0.03 | 0.04 | 0     | 0    | 0.05  | 0.05 | 0.05  | 0.05 |
| 6                 | 0.9  | 0.07 | 0.02 | 0.04 | 0     | 0    | 0.04  | 0.04 | 0.04  | 0.04 |
| 7                 | 0.92 | 0.07 | 0.02 | 0.04 | 0     | 0    | 0.02  | 0.04 | 0.04  | 0.04 |
| 8                 | 0.92 | 0.07 | 0.02 | 0.04 | 0     | 0    | 0.02  | 0.04 | 0.04  | 0.04 |
| 9                 | 0.92 | 0.07 | 0.02 | 0.04 | 0     | 0    | 0.02  | 0.04 | 0.04  | 0.04 |
| 10                | 0.93 | 0.06 | 0.02 | 0.04 | 0     | 0    | 0.02  | 0.03 | 0.03  | 0.04 |
| 11                | 0.93 | 0.06 | 0.02 | 0.04 | 0     | 0    | 0.02  | 0.03 | 0.03  | 0.04 |
| 12                | 0.94 | 0.06 | 0.02 | 0.03 | 0     | 0    | 0.02  | 0.03 | 0.03  | 0.04 |

**age=40 years, timing allo <6 months, cmv=others, donor=UD, graft=PBSC, TBI=no TBI, In vivo Tcell depletion=yes,**

| Landmark time (y) | GRFS | se   | GF   | se   | AGVHD | se   | CGVHD | se   | Death | se   |
|-------------------|------|------|------|------|-------|------|-------|------|-------|------|
| 0                 | 0.61 | 0.1  | 0.06 | 0.04 | 0.14  | 0.09 | 0.06  | 0.05 | 0.14  | 0.06 |
| 1                 | 0.64 | 0.11 | 0.06 | 0.04 | 0.11  | 0.09 | 0.06  | 0.05 | 0.13  | 0.06 |
| 2                 | 0.72 | 0.1  | 0.05 | 0.05 | 0.02  | 0.05 | 0.08  | 0.06 | 0.13  | 0.07 |
| 3                 | 0.76 | 0.1  | 0.05 | 0.05 | 0     | 0    | 0.08  | 0.06 | 0.12  | 0.07 |
| 4                 | 0.81 | 0.1  | 0.03 | 0.04 | 0     | 0    | 0.07  | 0.07 | 0.09  | 0.07 |
| 5                 | 0.83 | 0.1  | 0.03 | 0.04 | 0     | 0    | 0.07  | 0.07 | 0.07  | 0.07 |
| 6                 | 0.86 | 0.09 | 0.02 | 0.04 | 0     | 0    | 0.05  | 0.06 | 0.06  | 0.06 |
| 7                 | 0.89 | 0.09 | 0.03 | 0.04 | 0     | 0    | 0.03  | 0.05 | 0.06  | 0.06 |
| 8                 | 0.89 | 0.09 | 0.03 | 0.04 | 0     | 0    | 0.03  | 0.05 | 0.05  | 0.06 |
| 9                 | 0.89 | 0.09 | 0.03 | 0.04 | 0     | 0    | 0.03  | 0.05 | 0.05  | 0.06 |
| 10                | 0.9  | 0.09 | 0.02 | 0.04 | 0     | 0    | 0.02  | 0.05 | 0.05  | 0.06 |
| 11                | 0.91 | 0.08 | 0.02 | 0.04 | 0     | 0    | 0.02  | 0.05 | 0.04  | 0.06 |
| 12                | 0.91 | 0.08 | 0.02 | 0.04 | 0     | 0    | 0.02  | 0.05 | 0.04  | 0.06 |

**age=50 years, timing allo <6 months, cmv=others, donor=UD, graft=PBSC, TBI=no TBI, In vivo Tcell depletion=yes,**

| Landmark time (y) | GRFS | se   | GF   | se   | AGVHD | se   | CGVHD | se   | Death | se   |
|-------------------|------|------|------|------|-------|------|-------|------|-------|------|
| 0                 | 0.5  | 0.12 | 0.06 | 0.04 | 0.18  | 0.12 | 0.07  | 0.06 | 0.19  | 0.08 |
| 1                 | 0.54 | 0.13 | 0.06 | 0.05 | 0.15  | 0.13 | 0.08  | 0.07 | 0.17  | 0.09 |
| 2                 | 0.63 | 0.13 | 0.05 | 0.05 | 0.03  | 0.08 | 0.11  | 0.08 | 0.18  | 0.1  |
| 3                 | 0.68 | 0.13 | 0.06 | 0.06 | 0     | 0    | 0.1   | 0.09 | 0.16  | 0.1  |
| 4                 | 0.75 | 0.13 | 0.04 | 0.05 | 0     | 0    | 0.1   | 0.09 | 0.12  | 0.1  |
| 5                 | 0.77 | 0.13 | 0.03 | 0.05 | 0     | 0    | 0.1   | 0.1  | 0.1   | 0.09 |
| 6                 | 0.81 | 0.13 | 0.03 | 0.05 | 0     | 0    | 0.07  | 0.09 | 0.09  | 0.09 |
| 7                 | 0.85 | 0.12 | 0.03 | 0.05 | 0     | 0    | 0.04  | 0.08 | 0.08  | 0.09 |
| 8                 | 0.85 | 0.12 | 0.03 | 0.05 | 0     | 0    | 0.04  | 0.08 | 0.07  | 0.09 |
| 9                 | 0.85 | 0.13 | 0.03 | 0.05 | 0     | 0    | 0.04  | 0.08 | 0.08  | 0.09 |
| 10                | 0.87 | 0.12 | 0.03 | 0.05 | 0     | 0    | 0.03  | 0.07 | 0.07  | 0.09 |
| 11                | 0.88 | 0.12 | 0.03 | 0.05 | 0     | 0    | 0.04  | 0.07 | 0.06  | 0.08 |
| 12                | 0.88 | 0.12 | 0.02 | 0.05 | 0     | 0    | 0.04  | 0.08 | 0.06  | 0.09 |

**age=10 years, timing allo >6 months, cmv=D-/R-, donor=MRD, graft=BM, TBI=TBI, In vivo Tcell depletion=yes,**

| Landmark time (y) | GRFS | se   | GF   | se   | AGVHD | se | CGVHD | se   | Death | se   |
|-------------------|------|------|------|------|-------|----|-------|------|-------|------|
| 0                 | 0.9  | 0.04 | 0.01 | 0.01 | 0     | 0  | 0.03  | 0.03 | 0.06  | 0.03 |
| 1                 | 0.91 | 0.04 | 0.01 | 0.01 | 0     | 0  | 0.03  | 0.03 | 0.05  | 0.03 |
| 2                 | 0.91 | 0.05 | 0.01 | 0.01 | 0     | 0  | 0.03  | 0.03 | 0.05  | 0.03 |
| 3                 | 0.92 | 0.05 | 0.01 | 0.01 | 0     | 0  | 0.03  | 0.03 | 0.04  | 0.03 |
| 4                 | 0.94 | 0.04 | 0.01 | 0.01 | 0     | 0  | 0.03  | 0.03 | 0.03  | 0.03 |
| 5                 | 0.94 | 0.04 | 0    | 0.01 | 0     | 0  | 0.03  | 0.03 | 0.03  | 0.03 |
| 6                 | 0.96 | 0.04 | 0    | 0.01 | 0     | 0  | 0.02  | 0.03 | 0.02  | 0.03 |
| 7                 | 0.96 | 0.04 | 0    | 0.01 | 0     | 0  | 0.01  | 0.02 | 0.02  | 0.03 |
| 8                 | 0.97 | 0.04 | 0    | 0.01 | 0     | 0  | 0.01  | 0.02 | 0.02  | 0.03 |
| 9                 | 0.97 | 0.04 | 0    | 0.01 | 0     | 0  | 0.01  | 0.02 | 0.02  | 0.03 |
| 10                | 0.97 | 0.03 | 0    | 0.01 | 0     | 0  | 0.01  | 0.02 | 0.02  | 0.02 |
| 11                | 0.97 | 0.03 | 0    | 0.01 | 0     | 0  | 0.01  | 0.02 | 0.02  | 0.02 |
| 12                | 0.97 | 0.03 | 0    | 0.01 | 0     | 0  | 0.01  | 0.02 | 0.02  | 0.02 |

**age=20 years, timing allo >6 months, cmv=D-/R-, donor=MRD, graft=BM, TBI=TBI, In vivo Tcell depletion=yes,**

| Landmark time (y) | GRFS | se   | GF   | se   | AGVHD | se | CGVHD | se   | Death | se   |
|-------------------|------|------|------|------|-------|----|-------|------|-------|------|
| 0                 | 0.86 | 0.06 | 0.01 | 0.01 | 0     | 0  | 0.04  | 0.03 | 0.09  | 0.04 |
| 1                 | 0.87 | 0.06 | 0.01 | 0.01 | 0     | 0  | 0.04  | 0.04 | 0.08  | 0.04 |
| 2                 | 0.87 | 0.06 | 0.01 | 0.01 | 0     | 0  | 0.05  | 0.04 | 0.07  | 0.04 |
| 3                 | 0.89 | 0.06 | 0.01 | 0.01 | 0     | 0  | 0.04  | 0.04 | 0.06  | 0.04 |
| 4                 | 0.91 | 0.06 | 0.01 | 0.01 | 0     | 0  | 0.04  | 0.04 | 0.05  | 0.04 |
| 5                 | 0.92 | 0.05 | 0    | 0.01 | 0     | 0  | 0.04  | 0.04 | 0.04  | 0.04 |
| 6                 | 0.94 | 0.05 | 0    | 0.01 | 0     | 0  | 0.03  | 0.04 | 0.03  | 0.04 |
| 7                 | 0.95 | 0.05 | 0    | 0.01 | 0     | 0  | 0.02  | 0.03 | 0.03  | 0.03 |
| 8                 | 0.95 | 0.05 | 0    | 0.01 | 0     | 0  | 0.02  | 0.03 | 0.03  | 0.03 |



|    |      |      |   |      |   |   |      |      |      |      |
|----|------|------|---|------|---|---|------|------|------|------|
| 9  | 0.95 | 0.05 | 0 | 0.01 | 0 | 0 | 0.02 | 0.03 | 0.03 | 0.03 |
| 10 | 0.96 | 0.04 | 0 | 0.01 | 0 | 0 | 0.01 | 0.03 | 0.03 | 0.03 |
| 11 | 0.96 | 0.04 | 0 | 0.01 | 0 | 0 | 0.01 | 0.03 | 0.02 | 0.03 |
| 12 | 0.96 | 0.04 | 0 | 0.01 | 0 | 0 | 0.01 | 0.03 | 0.02 | 0.03 |

**age=30 years, timing allo >6 months, cmv=D-/R-, donor=MRD, graft=BM, TBI=TBI, In vivo Tcell depletion=yes,**

| Landmark time (y) | GRFS | se   | GF   | se   | AGVHD | se | CGVHD | se   | Death | se   |
|-------------------|------|------|------|------|-------|----|-------|------|-------|------|
| 0                 | 0.8  | 0.07 | 0.01 | 0.01 | 0     | 0  | 0.06  | 0.05 | 0.12  | 0.06 |
| 1                 | 0.82 | 0.07 | 0.01 | 0.01 | 0     | 0  | 0.06  | 0.05 | 0.11  | 0.06 |
| 2                 | 0.82 | 0.08 | 0.01 | 0.01 | 0     | 0  | 0.06  | 0.05 | 0.1   | 0.06 |
| 3                 | 0.84 | 0.08 | 0.01 | 0.01 | 0     | 0  | 0.06  | 0.05 | 0.09  | 0.06 |
| 4                 | 0.87 | 0.07 | 0.01 | 0.01 | 0     | 0  | 0.05  | 0.05 | 0.07  | 0.05 |
| 5                 | 0.89 | 0.07 | 0    | 0.01 | 0     | 0  | 0.05  | 0.05 | 0.05  | 0.05 |
| 6                 | 0.91 | 0.07 | 0    | 0.01 | 0     | 0  | 0.04  | 0.05 | 0.05  | 0.05 |
| 7                 | 0.93 | 0.06 | 0    | 0.01 | 0     | 0  | 0.02  | 0.04 | 0.04  | 0.05 |
| 8                 | 0.93 | 0.06 | 0    | 0.01 | 0     | 0  | 0.02  | 0.04 | 0.04  | 0.04 |
| 9                 | 0.93 | 0.06 | 0    | 0.01 | 0     | 0  | 0.02  | 0.04 | 0.04  | 0.05 |
| 10                | 0.94 | 0.06 | 0    | 0.01 | 0     | 0  | 0.02  | 0.04 | 0.04  | 0.04 |
| 11                | 0.95 | 0.06 | 0    | 0.01 | 0     | 0  | 0.02  | 0.04 | 0.03  | 0.04 |
| 12                | 0.94 | 0.06 | 0    | 0.01 | 0     | 0  | 0.02  | 0.04 | 0.03  | 0.04 |

**age=40 years, timing allo >6 months, cmv=D-/R-, donor=MRD, graft=BM, TBI=TBI, In vivo Tcell depletion=yes,**

| Landmark time (y) | GRFS | se   | GF   | se   | AGVHD | se | CGVHD | se   | Death | se   |
|-------------------|------|------|------|------|-------|----|-------|------|-------|------|
| 0                 | 0.73 | 0.09 | 0.01 | 0.01 | 0     | 0  | 0.08  | 0.06 | 0.17  | 0.07 |
| 1                 | 0.75 | 0.09 | 0.01 | 0.01 | 0     | 0  | 0.08  | 0.06 | 0.15  | 0.07 |
| 2                 | 0.76 | 0.1  | 0.01 | 0.01 | 0     | 0  | 0.09  | 0.07 | 0.14  | 0.08 |
| 3                 | 0.78 | 0.1  | 0.01 | 0.01 | 0     | 0  | 0.09  | 0.07 | 0.12  | 0.08 |
| 4                 | 0.82 | 0.1  | 0.01 | 0.01 | 0     | 0  | 0.08  | 0.07 | 0.09  | 0.07 |
| 5                 | 0.84 | 0.1  | 0.01 | 0.01 | 0     | 0  | 0.08  | 0.07 | 0.07  | 0.07 |
| 6                 | 0.87 | 0.09 | 0    | 0.01 | 0     | 0  | 0.06  | 0.07 | 0.06  | 0.07 |
| 7                 | 0.9  | 0.09 | 0.01 | 0.01 | 0     | 0  | 0.03  | 0.06 | 0.06  | 0.06 |
| 8                 | 0.9  | 0.09 | 0.01 | 0.01 | 0     | 0  | 0.04  | 0.06 | 0.06  | 0.06 |
| 9                 | 0.9  | 0.09 | 0.01 | 0.01 | 0     | 0  | 0.04  | 0.06 | 0.06  | 0.06 |
| 10                | 0.92 | 0.08 | 0    | 0.01 | 0     | 0  | 0.03  | 0.05 | 0.05  | 0.06 |
| 11                | 0.92 | 0.08 | 0    | 0.01 | 0     | 0  | 0.03  | 0.06 | 0.05  | 0.06 |
| 12                | 0.92 | 0.08 | 0    | 0.01 | 0     | 0  | 0.03  | 0.06 | 0.05  | 0.06 |

**age=50 years, timing allo >6 months, cmv=D-/R-, donor=MRD, graft=BM, TBI=TBI, In vivo Tcell depletion=yes,**

| Landmark time (y) | GRFS | se   | GF   | se   | AGVHD | se   | CGVHD | se   | Death | se  |
|-------------------|------|------|------|------|-------|------|-------|------|-------|-----|
| 0                 | 0.64 | 0.12 | 0.01 | 0.01 | 0     | 0.01 | 0.11  | 0.08 | 0.24  | 0.1 |
| 1                 | 0.66 | 0.12 | 0.01 | 0.01 | 0     | 0.01 | 0.11  | 0.09 | 0.21  | 0.1 |
| 2                 | 0.67 | 0.13 | 0.01 | 0.01 | 0     | 0    | 0.12  | 0.09 | 0.2   | 0.1 |
| 3                 | 0.7  | 0.13 | 0.01 | 0.01 | 0     | 0    | 0.12  | 0.1  | 0.17  | 0.1 |
| 4                 | 0.76 | 0.13 | 0.01 | 0.01 | 0     | 0    | 0.11  | 0.1  | 0.13  | 0.1 |

|    |      |      |      |      |   |   |      |      |      |      |
|----|------|------|------|------|---|---|------|------|------|------|
| 5  | 0.78 | 0.13 | 0.01 | 0.01 | 0 | 0 | 0.11 | 0.11 | 0.1  | 0.09 |
| 6  | 0.82 | 0.13 | 0.01 | 0.01 | 0 | 0 | 0.08 | 0.1  | 0.09 | 0.09 |
| 7  | 0.86 | 0.12 | 0.01 | 0.01 | 0 | 0 | 0.05 | 0.09 | 0.09 | 0.09 |
| 8  | 0.87 | 0.12 | 0.01 | 0.01 | 0 | 0 | 0.05 | 0.09 | 0.08 | 0.09 |
| 9  | 0.86 | 0.12 | 0.01 | 0.01 | 0 | 0 | 0.05 | 0.09 | 0.08 | 0.09 |
| 10 | 0.88 | 0.12 | 0    | 0.01 | 0 | 0 | 0.04 | 0.08 | 0.07 | 0.09 |
| 11 | 0.89 | 0.11 | 0.01 | 0.01 | 0 | 0 | 0.04 | 0.08 | 0.07 | 0.08 |
| 12 | 0.89 | 0.12 | 0    | 0.01 | 0 | 0 | 0.04 | 0.08 | 0.07 | 0.09 |

**age=10 years, timing allo <6 months, cmv=D-/R-, donor=MRD, graft=BM, TBI=TBI, In vivo Tcell depletion=yes,**

| Landmark time (y) | GRFS | se   | GF   | se   | AGVHD | se | CGVHD | se   | Death | se   |
|-------------------|------|------|------|------|-------|----|-------|------|-------|------|
| 0                 | 0.87 | 0.06 | 0.01 | 0.01 | 0     | 0  | 0.06  | 0.06 | 0.05  | 0.03 |
| 1                 | 0.88 | 0.06 | 0.01 | 0.01 | 0     | 0  | 0.06  | 0.06 | 0.05  | 0.03 |
| 2                 | 0.88 | 0.07 | 0.01 | 0.01 | 0     | 0  | 0.07  | 0.06 | 0.04  | 0.03 |
| 3                 | 0.89 | 0.07 | 0.01 | 0.01 | 0     | 0  | 0.07  | 0.06 | 0.04  | 0.03 |
| 4                 | 0.91 | 0.07 | 0    | 0.01 | 0     | 0  | 0.06  | 0.06 | 0.03  | 0.03 |
| 5                 | 0.92 | 0.07 | 0    | 0.01 | 0     | 0  | 0.06  | 0.06 | 0.02  | 0.02 |
| 6                 | 0.94 | 0.06 | 0    | 0.01 | 0     | 0  | 0.04  | 0.06 | 0.02  | 0.02 |
| 7                 | 0.95 | 0.06 | 0    | 0.01 | 0     | 0  | 0.03  | 0.05 | 0.02  | 0.02 |
| 8                 | 0.95 | 0.06 | 0    | 0.01 | 0     | 0  | 0.03  | 0.05 | 0.02  | 0.02 |
| 9                 | 0.95 | 0.06 | 0    | 0.01 | 0     | 0  | 0.03  | 0.05 | 0.02  | 0.02 |
| 10                | 0.96 | 0.05 | 0    | 0.01 | 0     | 0  | 0.02  | 0.05 | 0.01  | 0.02 |
| 11                | 0.96 | 0.05 | 0    | 0.01 | 0     | 0  | 0.02  | 0.05 | 0.01  | 0.02 |
| 12                | 0.96 | 0.05 | 0    | 0.01 | 0     | 0  | 0.02  | 0.05 | 0.01  | 0.02 |

**age=20 years, timing allo <6 months, cmv=D-/R-, donor=MRD, graft=BM, TBI=TBI, In vivo Tcell depletion=yes,**

| Landmark time (y) | GRFS | se   | GF   | se   | AGVHD | se | CGVHD | se   | Death | se   |
|-------------------|------|------|------|------|-------|----|-------|------|-------|------|
| 0                 | 0.82 | 0.08 | 0.01 | 0.01 | 0     | 0  | 0.09  | 0.08 | 0.07  | 0.04 |
| 1                 | 0.83 | 0.08 | 0.01 | 0.01 | 0     | 0  | 0.09  | 0.08 | 0.06  | 0.04 |
| 2                 | 0.83 | 0.09 | 0.01 | 0.01 | 0     | 0  | 0.1   | 0.08 | 0.06  | 0.04 |
| 3                 | 0.84 | 0.09 | 0.01 | 0.01 | 0     | 0  | 0.1   | 0.09 | 0.05  | 0.04 |
| 4                 | 0.87 | 0.09 | 0.01 | 0.01 | 0     | 0  | 0.08  | 0.09 | 0.04  | 0.04 |
| 5                 | 0.88 | 0.09 | 0    | 0.01 | 0     | 0  | 0.08  | 0.09 | 0.03  | 0.03 |
| 6                 | 0.91 | 0.09 | 0    | 0.01 | 0     | 0  | 0.06  | 0.08 | 0.03  | 0.03 |
| 7                 | 0.93 | 0.08 | 0    | 0.01 | 0     | 0  | 0.04  | 0.07 | 0.03  | 0.03 |
| 8                 | 0.94 | 0.08 | 0    | 0.01 | 0     | 0  | 0.04  | 0.07 | 0.02  | 0.03 |
| 9                 | 0.93 | 0.08 | 0    | 0.01 | 0     | 0  | 0.04  | 0.07 | 0.02  | 0.03 |
| 10                | 0.95 | 0.07 | 0    | 0.01 | 0     | 0  | 0.03  | 0.06 | 0.02  | 0.03 |
| 11                | 0.95 | 0.07 | 0    | 0.01 | 0     | 0  | 0.03  | 0.06 | 0.02  | 0.03 |
| 12                | 0.95 | 0.07 | 0    | 0.01 | 0     | 0  | 0.03  | 0.06 | 0.02  | 0.03 |

**age=30 years, timing allo <6 months, cmv=D-/R-, donor=MRD, graft=BM, TBI=TBI, In vivo Tcell depletion=yes,**

| Landmark time (y) | GRFS | se   | GF   | se   | AGVHD | se   | CGVHD | se  | Death | se   |
|-------------------|------|------|------|------|-------|------|-------|-----|-------|------|
| 0                 | 0.75 | 0.11 | 0.01 | 0.01 | 0     | 0.01 | 0.13  | 0.1 | 0.11  | 0.05 |

|    |      |      |      |      |   |      |      |      |      |      |
|----|------|------|------|------|---|------|------|------|------|------|
| 1  | 0.77 | 0.11 | 0.01 | 0.01 | 0 | 0.01 | 0.13 | 0.1  | 0.09 | 0.05 |
| 2  | 0.76 | 0.12 | 0.01 | 0.01 | 0 | 0    | 0.14 | 0.11 | 0.09 | 0.05 |
| 3  | 0.78 | 0.12 | 0.01 | 0.01 | 0 | 0    | 0.14 | 0.12 | 0.07 | 0.05 |
| 4  | 0.82 | 0.13 | 0.01 | 0.01 | 0 | 0    | 0.12 | 0.12 | 0.05 | 0.05 |
| 5  | 0.83 | 0.13 | 0    | 0.01 | 0 | 0    | 0.12 | 0.12 | 0.04 | 0.05 |
| 6  | 0.87 | 0.12 | 0    | 0.01 | 0 | 0    | 0.09 | 0.12 | 0.04 | 0.04 |
| 7  | 0.9  | 0.11 | 0    | 0.01 | 0 | 0    | 0.05 | 0.1  | 0.04 | 0.04 |
| 8  | 0.91 | 0.11 | 0    | 0.01 | 0 | 0    | 0.05 | 0.1  | 0.03 | 0.04 |
| 9  | 0.91 | 0.11 | 0    | 0.01 | 0 | 0    | 0.05 | 0.1  | 0.03 | 0.04 |
| 10 | 0.92 | 0.1  | 0    | 0.01 | 0 | 0    | 0.04 | 0.09 | 0.03 | 0.04 |
| 11 | 0.93 | 0.1  | 0    | 0.01 | 0 | 0    | 0.04 | 0.09 | 0.03 | 0.04 |
| 12 | 0.93 | 0.1  | 0    | 0.01 | 0 | 0    | 0.04 | 0.09 | 0.03 | 0.04 |

**age=40 years, timing allo <6 months, cmv=D-/R-, donor=MRD, graft=BM, TBI=TBI, In vivo Tcell depletion=yes,**

| Landmark time (y) | GRFS | se   | GF   | se   | AGVHD | se   | CGVHD | se   | Death | se   |
|-------------------|------|------|------|------|-------|------|-------|------|-------|------|
| 0                 | 0.66 | 0.15 | 0.01 | 0.01 | 0.01  | 0.01 | 0.17  | 0.14 | 0.15  | 0.07 |
| 1                 | 0.68 | 0.15 | 0.01 | 0.01 | 0.01  | 0.01 | 0.18  | 0.14 | 0.13  | 0.07 |
| 2                 | 0.67 | 0.16 | 0.01 | 0.01 | 0     | 0    | 0.2   | 0.16 | 0.12  | 0.07 |
| 3                 | 0.7  | 0.17 | 0.01 | 0.01 | 0     | 0    | 0.19  | 0.16 | 0.1   | 0.07 |
| 4                 | 0.75 | 0.17 | 0.01 | 0.01 | 0     | 0    | 0.17  | 0.17 | 0.08  | 0.07 |
| 5                 | 0.76 | 0.17 | 0    | 0.01 | 0     | 0    | 0.17  | 0.17 | 0.06  | 0.06 |
| 6                 | 0.81 | 0.17 | 0    | 0.01 | 0     | 0    | 0.13  | 0.17 | 0.05  | 0.06 |
| 7                 | 0.86 | 0.16 | 0    | 0.01 | 0     | 0    | 0.08  | 0.15 | 0.05  | 0.06 |
| 8                 | 0.87 | 0.15 | 0    | 0.01 | 0     | 0    | 0.08  | 0.15 | 0.05  | 0.06 |
| 9                 | 0.87 | 0.16 | 0    | 0.01 | 0     | 0    | 0.08  | 0.15 | 0.05  | 0.06 |
| 10                | 0.89 | 0.14 | 0    | 0.01 | 0     | 0    | 0.06  | 0.13 | 0.04  | 0.06 |
| 11                | 0.89 | 0.14 | 0    | 0.01 | 0     | 0    | 0.06  | 0.14 | 0.04  | 0.06 |
| 12                | 0.89 | 0.14 | 0    | 0.01 | 0     | 0    | 0.06  | 0.14 | 0.04  | 0.06 |

**age=50 years, timing allo <6 months, cmv=D-/R-, donor=MRD, graft=BM, TBI=TBI, In vivo Tcell depletion=yes,**

| Landmark time (y) | GRFS | se   | GF   | se   | AGVHD | se   | CGVHD | se   | Death | se   |
|-------------------|------|------|------|------|-------|------|-------|------|-------|------|
| 0                 | 0.55 | 0.19 | 0.01 | 0.01 | 0.01  | 0.01 | 0.23  | 0.19 | 0.2   | 0.1  |
| 1                 | 0.57 | 0.2  | 0.01 | 0.01 | 0.01  | 0.01 | 0.24  | 0.19 | 0.17  | 0.1  |
| 2                 | 0.56 | 0.21 | 0.01 | 0.01 | 0     | 0.01 | 0.27  | 0.21 | 0.16  | 0.1  |
| 3                 | 0.59 | 0.22 | 0.01 | 0.01 | 0     | 0    | 0.26  | 0.22 | 0.14  | 0.1  |
| 4                 | 0.65 | 0.24 | 0.01 | 0.01 | 0     | 0    | 0.23  | 0.23 | 0.1   | 0.1  |
| 5                 | 0.67 | 0.24 | 0    | 0.01 | 0     | 0    | 0.24  | 0.24 | 0.08  | 0.09 |
| 6                 | 0.74 | 0.24 | 0    | 0.01 | 0     | 0    | 0.18  | 0.24 | 0.07  | 0.09 |
| 7                 | 0.81 | 0.23 | 0    | 0.01 | 0     | 0    | 0.11  | 0.22 | 0.07  | 0.09 |
| 8                 | 0.82 | 0.23 | 0.01 | 0.01 | 0     | 0    | 0.11  | 0.22 | 0.07  | 0.09 |
| 9                 | 0.81 | 0.23 | 0.01 | 0.01 | 0     | 0    | 0.11  | 0.22 | 0.07  | 0.09 |
| 10                | 0.84 | 0.21 | 0    | 0.01 | 0     | 0    | 0.09  | 0.2  | 0.06  | 0.09 |
| 11                | 0.85 | 0.21 | 0    | 0.01 | 0     | 0    | 0.09  | 0.2  | 0.06  | 0.09 |
| 12                | 0.85 | 0.21 | 0    | 0.01 | 0     | 0    | 0.09  | 0.21 | 0.06  | 0.09 |

**age=10 years, timing allo >6 months, cmv=others, donor=MRD, graft=BM, TBI=TBI, In vivo Tcell depletion=yes,**

| Landmark time (y) | GRFS | se   | GF   | se   | AGVHD | se | CGVHD | se   | Death | se   |
|-------------------|------|------|------|------|-------|----|-------|------|-------|------|
| 0                 | 0.88 | 0.05 | 0.05 | 0.04 | 0     | 0  | 0.02  | 0.02 | 0.05  | 0.03 |
| 1                 | 0.89 | 0.05 | 0.04 | 0.04 | 0     | 0  | 0.02  | 0.02 | 0.04  | 0.03 |
| 2                 | 0.9  | 0.05 | 0.03 | 0.04 | 0     | 0  | 0.02  | 0.02 | 0.04  | 0.03 |
| 3                 | 0.91 | 0.05 | 0.04 | 0.04 | 0     | 0  | 0.02  | 0.02 | 0.04  | 0.03 |
| 4                 | 0.93 | 0.05 | 0.02 | 0.03 | 0     | 0  | 0.02  | 0.02 | 0.03  | 0.02 |
| 5                 | 0.94 | 0.04 | 0.02 | 0.03 | 0     | 0  | 0.02  | 0.02 | 0.02  | 0.02 |
| 6                 | 0.95 | 0.04 | 0.02 | 0.03 | 0     | 0  | 0.01  | 0.02 | 0.02  | 0.02 |
| 7                 | 0.96 | 0.04 | 0.02 | 0.03 | 0     | 0  | 0.01  | 0.02 | 0.02  | 0.02 |
| 8                 | 0.96 | 0.04 | 0.02 | 0.03 | 0     | 0  | 0.01  | 0.02 | 0.02  | 0.02 |
| 9                 | 0.96 | 0.04 | 0.02 | 0.03 | 0     | 0  | 0.01  | 0.02 | 0.02  | 0.02 |
| 10                | 0.96 | 0.04 | 0.01 | 0.03 | 0     | 0  | 0.01  | 0.02 | 0.01  | 0.02 |
| 11                | 0.97 | 0.04 | 0.01 | 0.03 | 0     | 0  | 0.01  | 0.02 | 0.01  | 0.02 |
| 12                | 0.97 | 0.04 | 0.01 | 0.03 | 0     | 0  | 0.01  | 0.02 | 0.01  | 0.02 |

**age=20 years, timing allo >6 months, cmv=others, donor=MRD, graft=BM, TBI=TBI, In vivo Tcell depletion=yes,**

| Landmark time (y) | GRFS | se   | GF   | se   | AGVHD | se | CGVHD | se   | Death | se   |
|-------------------|------|------|------|------|-------|----|-------|------|-------|------|
| 0                 | 0.84 | 0.05 | 0.05 | 0.04 | 0     | 0  | 0.03  | 0.03 | 0.07  | 0.03 |
| 1                 | 0.85 | 0.05 | 0.05 | 0.04 | 0     | 0  | 0.03  | 0.03 | 0.06  | 0.03 |
| 2                 | 0.87 | 0.06 | 0.04 | 0.04 | 0     | 0  | 0.04  | 0.03 | 0.06  | 0.03 |
| 3                 | 0.88 | 0.06 | 0.04 | 0.04 | 0     | 0  | 0.03  | 0.03 | 0.05  | 0.03 |
| 4                 | 0.91 | 0.05 | 0.03 | 0.03 | 0     | 0  | 0.03  | 0.03 | 0.04  | 0.03 |
| 5                 | 0.92 | 0.05 | 0.02 | 0.03 | 0     | 0  | 0.03  | 0.03 | 0.03  | 0.03 |
| 6                 | 0.93 | 0.05 | 0.02 | 0.03 | 0     | 0  | 0.02  | 0.03 | 0.03  | 0.03 |
| 7                 | 0.94 | 0.05 | 0.02 | 0.03 | 0     | 0  | 0.01  | 0.02 | 0.02  | 0.03 |
| 8                 | 0.95 | 0.04 | 0.02 | 0.03 | 0     | 0  | 0.01  | 0.02 | 0.02  | 0.03 |
| 9                 | 0.94 | 0.05 | 0.02 | 0.03 | 0     | 0  | 0.01  | 0.02 | 0.02  | 0.03 |
| 10                | 0.95 | 0.04 | 0.02 | 0.03 | 0     | 0  | 0.01  | 0.02 | 0.02  | 0.03 |
| 11                | 0.96 | 0.04 | 0.02 | 0.03 | 0     | 0  | 0.01  | 0.02 | 0.02  | 0.02 |
| 12                | 0.96 | 0.04 | 0.01 | 0.03 | 0     | 0  | 0.01  | 0.02 | 0.02  | 0.03 |

**age=30 years, timing allo >6 months, cmv=others, donor=MRD, graft=BM, TBI=TBI, In vivo Tcell depletion=yes,**

| Landmark time (y) | GRFS | se   | GF   | se   | AGVHD | se   | CGVHD | se   | Death | se   |
|-------------------|------|------|------|------|-------|------|-------|------|-------|------|
| 0                 | 0.79 | 0.06 | 0.05 | 0.04 | 0     | 0.01 | 0.04  | 0.03 | 0.1   | 0.04 |
| 1                 | 0.81 | 0.06 | 0.05 | 0.04 | 0     | 0.01 | 0.05  | 0.03 | 0.09  | 0.04 |
| 2                 | 0.82 | 0.06 | 0.04 | 0.04 | 0     | 0    | 0.05  | 0.04 | 0.09  | 0.04 |
| 3                 | 0.83 | 0.06 | 0.04 | 0.04 | 0     | 0    | 0.05  | 0.04 | 0.07  | 0.04 |
| 4                 | 0.87 | 0.06 | 0.03 | 0.03 | 0     | 0    | 0.04  | 0.04 | 0.05  | 0.04 |
| 5                 | 0.89 | 0.06 | 0.02 | 0.03 | 0     | 0    | 0.04  | 0.04 | 0.04  | 0.04 |
| 6                 | 0.91 | 0.06 | 0.02 | 0.03 | 0     | 0    | 0.03  | 0.04 | 0.04  | 0.04 |
| 7                 | 0.93 | 0.05 | 0.02 | 0.03 | 0     | 0    | 0.02  | 0.03 | 0.04  | 0.03 |
| 8                 | 0.93 | 0.05 | 0.02 | 0.03 | 0     | 0    | 0.02  | 0.03 | 0.03  | 0.03 |

|    |      |      |      |      |   |   |      |      |      |      |
|----|------|------|------|------|---|---|------|------|------|------|
| 9  | 0.93 | 0.05 | 0.02 | 0.03 | 0 | 0 | 0.02 | 0.03 | 0.03 | 0.03 |
| 10 | 0.94 | 0.05 | 0.02 | 0.03 | 0 | 0 | 0.01 | 0.03 | 0.03 | 0.03 |
| 11 | 0.94 | 0.05 | 0.02 | 0.03 | 0 | 0 | 0.01 | 0.03 | 0.03 | 0.03 |
| 12 | 0.94 | 0.05 | 0.01 | 0.03 | 0 | 0 | 0.02 | 0.03 | 0.03 | 0.03 |

**age=40 years, timing allo >6 months, cmv=others, donor=MRD, graft=BM, TBI=TBI, In vivo Tcell depletion=yes,**

| Landmark time (y) | GRFS | se   | GF   | se   | AGVHD | se   | CGVHD | se   | Death | se   |
|-------------------|------|------|------|------|-------|------|-------|------|-------|------|
| 0                 | 0.73 | 0.07 | 0.06 | 0.04 | 0.01  | 0.01 | 0.06  | 0.04 | 0.14  | 0.05 |
| 1                 | 0.75 | 0.07 | 0.06 | 0.04 | 0.01  | 0.01 | 0.06  | 0.04 | 0.12  | 0.05 |
| 2                 | 0.76 | 0.08 | 0.05 | 0.04 | 0     | 0    | 0.07  | 0.05 | 0.12  | 0.06 |
| 3                 | 0.78 | 0.08 | 0.05 | 0.04 | 0     | 0    | 0.07  | 0.05 | 0.1   | 0.05 |
| 4                 | 0.83 | 0.08 | 0.03 | 0.04 | 0     | 0    | 0.06  | 0.05 | 0.08  | 0.05 |
| 5                 | 0.85 | 0.07 | 0.02 | 0.03 | 0     | 0    | 0.06  | 0.05 | 0.06  | 0.05 |
| 6                 | 0.88 | 0.07 | 0.02 | 0.03 | 0     | 0    | 0.05  | 0.05 | 0.05  | 0.05 |
| 7                 | 0.9  | 0.07 | 0.02 | 0.03 | 0     | 0    | 0.03  | 0.04 | 0.05  | 0.05 |
| 8                 | 0.9  | 0.07 | 0.02 | 0.03 | 0     | 0    | 0.03  | 0.04 | 0.05  | 0.04 |
| 9                 | 0.9  | 0.07 | 0.02 | 0.04 | 0     | 0    | 0.03  | 0.04 | 0.05  | 0.05 |
| 10                | 0.92 | 0.06 | 0.02 | 0.03 | 0     | 0    | 0.02  | 0.04 | 0.04  | 0.04 |
| 11                | 0.92 | 0.06 | 0.02 | 0.03 | 0     | 0    | 0.02  | 0.04 | 0.04  | 0.04 |
| 12                | 0.92 | 0.06 | 0.02 | 0.03 | 0     | 0    | 0.02  | 0.04 | 0.04  | 0.04 |

**age=50 years, timing allo >6 months, cmv=others, donor=MRD, graft=BM, TBI=TBI, In vivo Tcell depletion=yes,**

| Landmark time (y) | GRFS | se   | GF   | se   | AGVHD | se   | CGVHD | se   | Death | se   |
|-------------------|------|------|------|------|-------|------|-------|------|-------|------|
| 0                 | 0.64 | 0.09 | 0.06 | 0.04 | 0.01  | 0.01 | 0.09  | 0.05 | 0.2   | 0.07 |
| 1                 | 0.67 | 0.09 | 0.06 | 0.04 | 0.01  | 0.01 | 0.09  | 0.06 | 0.17  | 0.07 |
| 2                 | 0.68 | 0.09 | 0.05 | 0.04 | 0     | 0.01 | 0.1   | 0.06 | 0.17  | 0.07 |
| 3                 | 0.71 | 0.1  | 0.05 | 0.04 | 0     | 0    | 0.1   | 0.06 | 0.14  | 0.07 |
| 4                 | 0.77 | 0.1  | 0.03 | 0.04 | 0     | 0    | 0.09  | 0.07 | 0.11  | 0.07 |
| 5                 | 0.8  | 0.1  | 0.03 | 0.04 | 0     | 0    | 0.09  | 0.07 | 0.09  | 0.07 |
| 6                 | 0.83 | 0.09 | 0.02 | 0.04 | 0     | 0    | 0.07  | 0.07 | 0.08  | 0.06 |
| 7                 | 0.86 | 0.09 | 0.02 | 0.04 | 0     | 0    | 0.04  | 0.06 | 0.07  | 0.06 |
| 8                 | 0.87 | 0.09 | 0.02 | 0.04 | 0     | 0    | 0.04  | 0.06 | 0.07  | 0.06 |
| 9                 | 0.87 | 0.09 | 0.03 | 0.04 | 0     | 0    | 0.04  | 0.06 | 0.07  | 0.06 |
| 10                | 0.88 | 0.09 | 0.02 | 0.04 | 0     | 0    | 0.03  | 0.05 | 0.06  | 0.06 |
| 11                | 0.89 | 0.08 | 0.02 | 0.04 | 0     | 0    | 0.03  | 0.05 | 0.05  | 0.06 |
| 12                | 0.89 | 0.08 | 0.02 | 0.03 | 0     | 0    | 0.03  | 0.05 | 0.06  | 0.06 |

**age=10 years, timing allo <6 months, cmv=others, donor=MRD, graft=BM, TBI=TBI, In vivo Tcell depletion=yes,**

| Landmark time (y) | GRFS | se   | GF   | se   | AGVHD | se   | CGVHD | se   | Death | se   |
|-------------------|------|------|------|------|-------|------|-------|------|-------|------|
| 0                 | 0.86 | 0.05 | 0.04 | 0.03 | 0     | 0.01 | 0.05  | 0.04 | 0.04  | 0.02 |
| 1                 | 0.87 | 0.05 | 0.04 | 0.03 | 0     | 0    | 0.05  | 0.04 | 0.04  | 0.02 |
| 2                 | 0.88 | 0.06 | 0.03 | 0.03 | 0     | 0    | 0.06  | 0.05 | 0.04  | 0.02 |
| 3                 | 0.88 | 0.06 | 0.03 | 0.03 | 0     | 0    | 0.05  | 0.05 | 0.03  | 0.02 |
| 4                 | 0.91 | 0.06 | 0.02 | 0.03 | 0     | 0    | 0.05  | 0.05 | 0.02  | 0.02 |

|    |      |      |      |      |   |   |      |      |      |      |
|----|------|------|------|------|---|---|------|------|------|------|
| 5  | 0.92 | 0.05 | 0.02 | 0.03 | 0 | 0 | 0.05 | 0.05 | 0.02 | 0.02 |
| 6  | 0.94 | 0.05 | 0.01 | 0.02 | 0 | 0 | 0.03 | 0.04 | 0.02 | 0.02 |
| 7  | 0.95 | 0.05 | 0.01 | 0.02 | 0 | 0 | 0.02 | 0.04 | 0.01 | 0.02 |
| 8  | 0.95 | 0.05 | 0.01 | 0.02 | 0 | 0 | 0.02 | 0.04 | 0.01 | 0.02 |
| 9  | 0.95 | 0.05 | 0.02 | 0.03 | 0 | 0 | 0.02 | 0.04 | 0.01 | 0.02 |
| 10 | 0.96 | 0.04 | 0.01 | 0.02 | 0 | 0 | 0.02 | 0.03 | 0.01 | 0.02 |
| 11 | 0.96 | 0.04 | 0.01 | 0.02 | 0 | 0 | 0.02 | 0.03 | 0.01 | 0.02 |
| 12 | 0.96 | 0.04 | 0.01 | 0.02 | 0 | 0 | 0.02 | 0.03 | 0.01 | 0.02 |

**age=20 years, timing allo <6 months, cmv=others, donor=MRD, graft=BM, TBI=TBI, In vivo Tcell depletion=yes,**

| Landmark time (y) | GRFS | se   | GF   | se   | AGVHD | se   | CGVHD | se   | Death | se   |
|-------------------|------|------|------|------|-------|------|-------|------|-------|------|
| 0                 | 0.82 | 0.06 | 0.05 | 0.03 | 0.01  | 0.01 | 0.07  | 0.05 | 0.06  | 0.03 |
| 1                 | 0.83 | 0.07 | 0.04 | 0.03 | 0.01  | 0.01 | 0.07  | 0.05 | 0.05  | 0.03 |
| 2                 | 0.83 | 0.07 | 0.03 | 0.03 | 0     | 0    | 0.08  | 0.06 | 0.05  | 0.03 |
| 3                 | 0.84 | 0.07 | 0.04 | 0.03 | 0     | 0    | 0.08  | 0.06 | 0.04  | 0.03 |
| 4                 | 0.88 | 0.07 | 0.02 | 0.03 | 0     | 0    | 0.07  | 0.06 | 0.03  | 0.03 |
| 5                 | 0.89 | 0.07 | 0.02 | 0.03 | 0     | 0    | 0.07  | 0.06 | 0.03  | 0.03 |
| 6                 | 0.91 | 0.06 | 0.02 | 0.03 | 0     | 0    | 0.05  | 0.06 | 0.02  | 0.02 |
| 7                 | 0.93 | 0.06 | 0.02 | 0.03 | 0     | 0    | 0.03  | 0.05 | 0.02  | 0.02 |
| 8                 | 0.93 | 0.06 | 0.02 | 0.03 | 0     | 0    | 0.03  | 0.05 | 0.02  | 0.02 |
| 9                 | 0.93 | 0.06 | 0.02 | 0.03 | 0     | 0    | 0.03  | 0.05 | 0.02  | 0.02 |
| 10                | 0.94 | 0.05 | 0.01 | 0.03 | 0     | 0    | 0.02  | 0.04 | 0.02  | 0.02 |
| 11                | 0.95 | 0.05 | 0.01 | 0.03 | 0     | 0    | 0.02  | 0.04 | 0.02  | 0.02 |
| 12                | 0.95 | 0.05 | 0.01 | 0.02 | 0     | 0    | 0.02  | 0.04 | 0.02  | 0.02 |

**age=30 years, timing allo <6 months, cmv=others, donor=MRD, graft=BM, TBI=TBI, In vivo Tcell depletion=yes,**

| Landmark time (y) | GRFS | se   | GF   | se   | AGVHD | se   | CGVHD | se   | Death | se   |
|-------------------|------|------|------|------|-------|------|-------|------|-------|------|
| 0                 | 0.75 | 0.08 | 0.05 | 0.03 | 0.01  | 0.01 | 0.1   | 0.07 | 0.09  | 0.04 |
| 1                 | 0.77 | 0.08 | 0.05 | 0.03 | 0.01  | 0.01 | 0.1   | 0.07 | 0.08  | 0.04 |
| 2                 | 0.77 | 0.09 | 0.04 | 0.03 | 0     | 0    | 0.11  | 0.08 | 0.07  | 0.04 |
| 3                 | 0.79 | 0.09 | 0.04 | 0.03 | 0     | 0    | 0.11  | 0.08 | 0.06  | 0.04 |
| 4                 | 0.83 | 0.09 | 0.02 | 0.03 | 0     | 0    | 0.1   | 0.08 | 0.05  | 0.04 |
| 5                 | 0.85 | 0.09 | 0.02 | 0.03 | 0     | 0    | 0.1   | 0.08 | 0.04  | 0.03 |
| 6                 | 0.88 | 0.08 | 0.02 | 0.03 | 0     | 0    | 0.07  | 0.08 | 0.03  | 0.03 |
| 7                 | 0.91 | 0.08 | 0.02 | 0.03 | 0     | 0    | 0.04  | 0.06 | 0.03  | 0.03 |
| 8                 | 0.91 | 0.08 | 0.02 | 0.03 | 0     | 0    | 0.04  | 0.07 | 0.03  | 0.03 |
| 9                 | 0.91 | 0.08 | 0.02 | 0.03 | 0     | 0    | 0.04  | 0.07 | 0.03  | 0.03 |
| 10                | 0.92 | 0.07 | 0.02 | 0.03 | 0     | 0    | 0.03  | 0.06 | 0.03  | 0.03 |
| 11                | 0.93 | 0.07 | 0.02 | 0.03 | 0     | 0    | 0.03  | 0.06 | 0.02  | 0.03 |
| 12                | 0.93 | 0.07 | 0.01 | 0.03 | 0     | 0    | 0.03  | 0.06 | 0.02  | 0.03 |

**age=40 years, timing allo <6 months, cmv=others, donor=MRD, graft=BM, TBI=TBI, In vivo Tcell depletion=yes,**

| Landmark time (y) | GRFS | se  | GF   | se   | AGVHD | se   | CGVHD | se   | Death | se   |
|-------------------|------|-----|------|------|-------|------|-------|------|-------|------|
| 0                 | 0.67 | 0.1 | 0.05 | 0.04 | 0.01  | 0.01 | 0.14  | 0.09 | 0.12  | 0.05 |

|    |      |      |      |      |      |      |      |      |      |      |
|----|------|------|------|------|------|------|------|------|------|------|
| 1  | 0.69 | 0.1  | 0.05 | 0.04 | 0.01 | 0.01 | 0.14 | 0.09 | 0.11 | 0.05 |
| 2  | 0.7  | 0.11 | 0.04 | 0.04 | 0    | 0.01 | 0.16 | 0.1  | 0.1  | 0.05 |
| 3  | 0.72 | 0.12 | 0.04 | 0.04 | 0    | 0    | 0.15 | 0.11 | 0.09 | 0.05 |
| 4  | 0.77 | 0.12 | 0.03 | 0.03 | 0    | 0    | 0.14 | 0.11 | 0.06 | 0.05 |
| 5  | 0.79 | 0.12 | 0.02 | 0.03 | 0    | 0    | 0.14 | 0.11 | 0.05 | 0.05 |
| 6  | 0.83 | 0.12 | 0.02 | 0.03 | 0    | 0    | 0.1  | 0.11 | 0.05 | 0.05 |
| 7  | 0.87 | 0.11 | 0.02 | 0.03 | 0    | 0    | 0.06 | 0.09 | 0.04 | 0.05 |
| 8  | 0.88 | 0.1  | 0.02 | 0.03 | 0    | 0    | 0.06 | 0.09 | 0.04 | 0.04 |
| 9  | 0.88 | 0.11 | 0.02 | 0.03 | 0    | 0    | 0.06 | 0.09 | 0.04 | 0.05 |
| 10 | 0.9  | 0.1  | 0.02 | 0.03 | 0    | 0    | 0.05 | 0.09 | 0.04 | 0.04 |
| 11 | 0.9  | 0.1  | 0.02 | 0.03 | 0    | 0    | 0.05 | 0.09 | 0.03 | 0.04 |
| 12 | 0.9  | 0.1  | 0.01 | 0.03 | 0    | 0    | 0.05 | 0.09 | 0.03 | 0.04 |

**age=50 years, timing allo <6 months, cmv=others, donor=MRD, graft=BM, TBI=TBI, In vivo Tcell depletion=yes,**

| Landmark time (y) | GRFS | se   | GF   | se   | AGVHD | se   | CGVHD | se   | Death | se   |
|-------------------|------|------|------|------|-------|------|-------|------|-------|------|
| 0                 | 0.57 | 0.13 | 0.06 | 0.04 | 0.02  | 0.02 | 0.19  | 0.12 | 0.17  | 0.07 |
| 1                 | 0.59 | 0.14 | 0.06 | 0.04 | 0.01  | 0.02 | 0.19  | 0.13 | 0.14  | 0.07 |
| 2                 | 0.6  | 0.15 | 0.04 | 0.04 | 0     | 0.01 | 0.22  | 0.14 | 0.14  | 0.07 |
| 3                 | 0.63 | 0.15 | 0.05 | 0.04 | 0     | 0    | 0.21  | 0.15 | 0.12  | 0.07 |
| 4                 | 0.69 | 0.16 | 0.03 | 0.04 | 0     | 0    | 0.19  | 0.16 | 0.09  | 0.07 |
| 5                 | 0.71 | 0.16 | 0.02 | 0.03 | 0     | 0    | 0.2   | 0.16 | 0.07  | 0.06 |
| 6                 | 0.77 | 0.16 | 0.02 | 0.03 | 0     | 0    | 0.15  | 0.16 | 0.06  | 0.06 |
| 7                 | 0.83 | 0.15 | 0.02 | 0.04 | 0     | 0    | 0.09  | 0.14 | 0.06  | 0.07 |
| 8                 | 0.83 | 0.15 | 0.02 | 0.04 | 0     | 0    | 0.09  | 0.14 | 0.06  | 0.06 |
| 9                 | 0.83 | 0.15 | 0.02 | 0.04 | 0     | 0    | 0.09  | 0.14 | 0.06  | 0.07 |
| 10                | 0.86 | 0.14 | 0.02 | 0.04 | 0     | 0    | 0.07  | 0.13 | 0.05  | 0.06 |
| 11                | 0.86 | 0.14 | 0.02 | 0.04 | 0     | 0    | 0.07  | 0.13 | 0.05  | 0.06 |
| 12                | 0.86 | 0.14 | 0.02 | 0.03 | 0     | 0    | 0.07  | 0.13 | 0.05  | 0.06 |

**age=10 years, timing allo >6 months, cmv=D-/R-, donor=UD, graft=BM, TBI=TBI, In vivo Tcell depletion=yes,**

| Landmark time (y) | GRFS | se   | GF   | se   | AGVHD | se   | CGVHD | se   | Death | se   |
|-------------------|------|------|------|------|-------|------|-------|------|-------|------|
| 0                 | 0.84 | 0.05 | 0.01 | 0.01 | 0.01  | 0.01 | 0.03  | 0.02 | 0.11  | 0.04 |
| 1                 | 0.86 | 0.05 | 0.01 | 0.01 | 0.01  | 0.01 | 0.03  | 0.02 | 0.1   | 0.04 |
| 2                 | 0.87 | 0.05 | 0.01 | 0.01 | 0     | 0    | 0.03  | 0.03 | 0.09  | 0.05 |
| 3                 | 0.88 | 0.05 | 0.01 | 0.01 | 0     | 0    | 0.03  | 0.03 | 0.08  | 0.04 |
| 4                 | 0.91 | 0.05 | 0    | 0.01 | 0     | 0    | 0.03  | 0.03 | 0.06  | 0.04 |
| 5                 | 0.92 | 0.05 | 0    | 0.01 | 0     | 0    | 0.03  | 0.03 | 0.05  | 0.04 |
| 6                 | 0.94 | 0.04 | 0    | 0.01 | 0     | 0    | 0.02  | 0.02 | 0.04  | 0.04 |
| 7                 | 0.95 | 0.04 | 0    | 0.01 | 0     | 0    | 0.01  | 0.02 | 0.04  | 0.04 |
| 8                 | 0.95 | 0.04 | 0    | 0.01 | 0     | 0    | 0.01  | 0.02 | 0.03  | 0.03 |
| 9                 | 0.95 | 0.04 | 0    | 0.01 | 0     | 0    | 0.01  | 0.02 | 0.04  | 0.04 |
| 10                | 0.96 | 0.04 | 0    | 0.01 | 0     | 0    | 0.01  | 0.02 | 0.03  | 0.03 |
| 11                | 0.96 | 0.04 | 0    | 0.01 | 0     | 0    | 0.01  | 0.02 | 0.03  | 0.03 |
| 12                | 0.96 | 0.04 | 0    | 0.01 | 0     | 0    | 0.01  | 0.02 | 0.03  | 0.03 |

**age=20 years, timing allo >6 months, cmv=D-/R-, donor=UD, graft=BM, TBI=TBI, In vivo Tcell depletion=yes,**

| Landmark time (y) | GRFS | se   | GF   | se   | AGVHD | se   | CGVHD | se   | Death | se   |
|-------------------|------|------|------|------|-------|------|-------|------|-------|------|
| 0                 | 0.78 | 0.06 | 0.01 | 0.01 | 0.01  | 0.01 | 0.04  | 0.03 | 0.16  | 0.05 |
| 1                 | 0.8  | 0.06 | 0.01 | 0.01 | 0.01  | 0.01 | 0.04  | 0.03 | 0.14  | 0.05 |
| 2                 | 0.81 | 0.06 | 0.01 | 0.01 | 0     | 0.01 | 0.05  | 0.03 | 0.13  | 0.06 |
| 3                 | 0.83 | 0.06 | 0.01 | 0.01 | 0     | 0    | 0.04  | 0.03 | 0.12  | 0.06 |
| 4                 | 0.87 | 0.06 | 0    | 0.01 | 0     | 0    | 0.04  | 0.03 | 0.08  | 0.05 |
| 5                 | 0.89 | 0.06 | 0    | 0.01 | 0     | 0    | 0.04  | 0.03 | 0.07  | 0.05 |
| 6                 | 0.91 | 0.05 | 0    | 0.01 | 0     | 0    | 0.03  | 0.03 | 0.06  | 0.05 |
| 7                 | 0.92 | 0.05 | 0    | 0.01 | 0     | 0    | 0.02  | 0.03 | 0.06  | 0.05 |
| 8                 | 0.93 | 0.05 | 0    | 0.01 | 0     | 0    | 0.02  | 0.03 | 0.05  | 0.04 |
| 9                 | 0.93 | 0.05 | 0    | 0.01 | 0     | 0    | 0.02  | 0.03 | 0.05  | 0.04 |
| 10                | 0.94 | 0.05 | 0    | 0.01 | 0     | 0    | 0.01  | 0.02 | 0.05  | 0.04 |
| 11                | 0.94 | 0.05 | 0    | 0.01 | 0     | 0    | 0.01  | 0.02 | 0.04  | 0.04 |
| 12                | 0.94 | 0.05 | 0    | 0.01 | 0     | 0    | 0.01  | 0.02 | 0.04  | 0.04 |

**age=30 years, timing allo >6 months, cmv=D-/R-, donor=UD, graft=BM, TBI=TBI, In vivo Tcell depletion=yes,**

| Landmark time (y) | GRFS | se   | GF   | se   | AGVHD | se   | CGVHD | se   | Death | se   |
|-------------------|------|------|------|------|-------|------|-------|------|-------|------|
| 0                 | 0.7  | 0.07 | 0.01 | 0.01 | 0.02  | 0.02 | 0.05  | 0.03 | 0.22  | 0.07 |
| 1                 | 0.73 | 0.07 | 0.01 | 0.01 | 0.02  | 0.02 | 0.06  | 0.04 | 0.19  | 0.07 |
| 2                 | 0.74 | 0.08 | 0.01 | 0.01 | 0     | 0.01 | 0.06  | 0.04 | 0.18  | 0.07 |
| 3                 | 0.77 | 0.08 | 0.01 | 0.01 | 0     | 0    | 0.06  | 0.04 | 0.16  | 0.07 |
| 4                 | 0.82 | 0.08 | 0.01 | 0.01 | 0     | 0    | 0.06  | 0.04 | 0.12  | 0.07 |
| 5                 | 0.84 | 0.07 | 0    | 0.01 | 0     | 0    | 0.06  | 0.04 | 0.1   | 0.06 |
| 6                 | 0.87 | 0.07 | 0    | 0.01 | 0     | 0    | 0.04  | 0.04 | 0.08  | 0.06 |
| 7                 | 0.89 | 0.07 | 0    | 0.01 | 0     | 0    | 0.03  | 0.03 | 0.08  | 0.06 |
| 8                 | 0.9  | 0.07 | 0    | 0.01 | 0     | 0    | 0.03  | 0.03 | 0.07  | 0.06 |
| 9                 | 0.9  | 0.07 | 0    | 0.01 | 0     | 0    | 0.03  | 0.03 | 0.07  | 0.06 |
| 10                | 0.91 | 0.06 | 0    | 0.01 | 0     | 0    | 0.02  | 0.03 | 0.07  | 0.06 |
| 11                | 0.92 | 0.06 | 0    | 0.01 | 0     | 0    | 0.02  | 0.03 | 0.06  | 0.05 |
| 12                | 0.92 | 0.06 | 0    | 0.01 | 0     | 0    | 0.02  | 0.03 | 0.06  | 0.06 |

**age=40 years, timing allo >6 months, cmv=D-/R-, donor=UD, graft=BM, TBI=TBI, In vivo Tcell depletion=yes,**

| Landmark time (y) | GRFS | se   | GF   | se   | AGVHD | se   | CGVHD | se   | Death | se   |
|-------------------|------|------|------|------|-------|------|-------|------|-------|------|
| 0                 | 0.6  | 0.09 | 0.01 | 0.01 | 0.03  | 0.02 | 0.07  | 0.04 | 0.29  | 0.08 |
| 1                 | 0.63 | 0.09 | 0.01 | 0.01 | 0.02  | 0.02 | 0.08  | 0.05 | 0.26  | 0.09 |
| 2                 | 0.65 | 0.1  | 0.01 | 0.01 | 0     | 0.01 | 0.09  | 0.05 | 0.25  | 0.09 |
| 3                 | 0.68 | 0.1  | 0.01 | 0.01 | 0     | 0    | 0.09  | 0.05 | 0.22  | 0.09 |
| 4                 | 0.75 | 0.1  | 0.01 | 0.01 | 0     | 0    | 0.08  | 0.06 | 0.17  | 0.09 |
| 5                 | 0.78 | 0.1  | 0    | 0.01 | 0     | 0    | 0.08  | 0.06 | 0.13  | 0.08 |
| 6                 | 0.82 | 0.1  | 0    | 0.01 | 0     | 0    | 0.06  | 0.06 | 0.12  | 0.08 |
| 7                 | 0.85 | 0.09 | 0    | 0.01 | 0     | 0    | 0.04  | 0.05 | 0.11  | 0.08 |
| 8                 | 0.86 | 0.09 | 0    | 0.01 | 0     | 0    | 0.04  | 0.05 | 0.1   | 0.08 |



|    |      |      |   |      |   |   |      |      |      |      |
|----|------|------|---|------|---|---|------|------|------|------|
| 9  | 0.85 | 0.09 | 0 | 0.01 | 0 | 0 | 0.04 | 0.05 | 0.1  | 0.08 |
| 10 | 0.87 | 0.09 | 0 | 0.01 | 0 | 0 | 0.03 | 0.04 | 0.1  | 0.08 |
| 11 | 0.88 | 0.09 | 0 | 0.01 | 0 | 0 | 0.03 | 0.04 | 0.08 | 0.08 |
| 12 | 0.88 | 0.09 | 0 | 0.01 | 0 | 0 | 0.03 | 0.04 | 0.09 | 0.08 |

**age=50 years, timing allo >6 months, cmv=D-/R-, donor=UD, graft=BM, TBI=TBI, In vivo Tcell depletion=yes,**

| Landmark time (y) | GRFS | se   | GF   | se   | AGVHD | se   | CGVHD | se   | Death | se   |
|-------------------|------|------|------|------|-------|------|-------|------|-------|------|
| 0                 | 0.47 | 0.11 | 0.01 | 0.01 | 0.04  | 0.03 | 0.09  | 0.06 | 0.39  | 0.11 |
| 1                 | 0.51 | 0.12 | 0.01 | 0.01 | 0.03  | 0.03 | 0.1   | 0.06 | 0.35  | 0.11 |
| 2                 | 0.53 | 0.12 | 0.01 | 0.01 | 0.01  | 0.02 | 0.12  | 0.07 | 0.34  | 0.12 |
| 3                 | 0.57 | 0.13 | 0.01 | 0.01 | 0     | 0    | 0.12  | 0.07 | 0.3   | 0.12 |
| 4                 | 0.66 | 0.14 | 0.01 | 0.01 | 0     | 0    | 0.11  | 0.08 | 0.23  | 0.12 |
| 5                 | 0.7  | 0.14 | 0    | 0.01 | 0     | 0    | 0.12  | 0.09 | 0.18  | 0.12 |
| 6                 | 0.75 | 0.14 | 0    | 0.01 | 0     | 0    | 0.09  | 0.08 | 0.16  | 0.12 |
| 7                 | 0.79 | 0.13 | 0    | 0.01 | 0     | 0    | 0.05  | 0.07 | 0.16  | 0.12 |
| 8                 | 0.8  | 0.13 | 0    | 0.01 | 0     | 0    | 0.05  | 0.07 | 0.14  | 0.12 |
| 9                 | 0.8  | 0.13 | 0    | 0.01 | 0     | 0    | 0.05  | 0.07 | 0.15  | 0.12 |
| 10                | 0.82 | 0.13 | 0    | 0.01 | 0     | 0    | 0.04  | 0.07 | 0.13  | 0.12 |
| 11                | 0.83 | 0.13 | 0    | 0.01 | 0     | 0    | 0.04  | 0.07 | 0.12  | 0.11 |
| 12                | 0.83 | 0.13 | 0    | 0.01 | 0     | 0    | 0.04  | 0.07 | 0.12  | 0.12 |

**age=10 years, timing allo <6 months, cmv=D-/R-, donor=UD, graft=BM, TBI=TBI, In vivo Tcell depletion=yes,**

| Landmark time (y) | GRFS | se   | GF   | se   | AGVHD | se   | CGVHD | se   | Death | se   |
|-------------------|------|------|------|------|-------|------|-------|------|-------|------|
| 0                 | 0.81 | 0.07 | 0.01 | 0.01 | 0.02  | 0.02 | 0.06  | 0.05 | 0.1   | 0.04 |
| 1                 | 0.83 | 0.07 | 0.01 | 0.01 | 0.01  | 0.02 | 0.07  | 0.05 | 0.08  | 0.04 |
| 2                 | 0.84 | 0.07 | 0.01 | 0.01 | 0     | 0.01 | 0.07  | 0.05 | 0.08  | 0.05 |
| 3                 | 0.85 | 0.07 | 0.01 | 0.01 | 0     | 0    | 0.07  | 0.06 | 0.07  | 0.04 |
| 4                 | 0.88 | 0.07 | 0    | 0.01 | 0     | 0    | 0.06  | 0.06 | 0.05  | 0.04 |
| 5                 | 0.89 | 0.07 | 0    | 0.01 | 0     | 0    | 0.06  | 0.06 | 0.04  | 0.04 |
| 6                 | 0.92 | 0.06 | 0    | 0.01 | 0     | 0    | 0.05  | 0.05 | 0.04  | 0.04 |
| 7                 | 0.94 | 0.06 | 0    | 0.01 | 0     | 0    | 0.03  | 0.04 | 0.03  | 0.04 |
| 8                 | 0.94 | 0.06 | 0    | 0.01 | 0     | 0    | 0.03  | 0.04 | 0.03  | 0.03 |
| 9                 | 0.94 | 0.06 | 0    | 0.01 | 0     | 0    | 0.03  | 0.04 | 0.03  | 0.04 |
| 10                | 0.95 | 0.05 | 0    | 0.01 | 0     | 0    | 0.02  | 0.04 | 0.03  | 0.03 |
| 11                | 0.95 | 0.05 | 0    | 0.01 | 0     | 0    | 0.02  | 0.04 | 0.02  | 0.03 |
| 12                | 0.95 | 0.05 | 0    | 0.01 | 0     | 0    | 0.02  | 0.04 | 0.03  | 0.03 |

**age=20 years, timing allo <6 months, cmv=D-/R-, donor=UD, graft=BM, TBI=TBI, In vivo Tcell depletion=yes,**

| Landmark time (y) | GRFS | se   | GF   | se   | AGVHD | se   | CGVHD | se   | Death | se   |
|-------------------|------|------|------|------|-------|------|-------|------|-------|------|
| 0                 | 0.74 | 0.08 | 0.01 | 0.01 | 0.03  | 0.02 | 0.09  | 0.06 | 0.13  | 0.06 |
| 1                 | 0.76 | 0.08 | 0.01 | 0.01 | 0.02  | 0.02 | 0.09  | 0.06 | 0.12  | 0.06 |
| 2                 | 0.77 | 0.09 | 0.01 | 0.01 | 0     | 0.01 | 0.1   | 0.07 | 0.11  | 0.06 |
| 3                 | 0.8  | 0.09 | 0.01 | 0.01 | 0     | 0    | 0.1   | 0.07 | 0.1   | 0.06 |
| 4                 | 0.84 | 0.09 | 0    | 0.01 | 0     | 0    | 0.09  | 0.07 | 0.07  | 0.06 |

|    |      |      |   |      |   |   |      |      |      |      |
|----|------|------|---|------|---|---|------|------|------|------|
| 5  | 0.85 | 0.09 | 0 | 0.01 | 0 | 0 | 0.09 | 0.08 | 0.06 | 0.05 |
| 6  | 0.88 | 0.08 | 0 | 0.01 | 0 | 0 | 0.07 | 0.07 | 0.05 | 0.05 |
| 7  | 0.91 | 0.08 | 0 | 0.01 | 0 | 0 | 0.04 | 0.06 | 0.05 | 0.05 |
| 8  | 0.91 | 0.08 | 0 | 0.01 | 0 | 0 | 0.04 | 0.06 | 0.04 | 0.05 |
| 9  | 0.91 | 0.08 | 0 | 0.01 | 0 | 0 | 0.04 | 0.06 | 0.04 | 0.05 |
| 10 | 0.93 | 0.07 | 0 | 0.01 | 0 | 0 | 0.03 | 0.06 | 0.04 | 0.05 |
| 11 | 0.93 | 0.07 | 0 | 0.01 | 0 | 0 | 0.03 | 0.06 | 0.04 | 0.05 |
| 12 | 0.93 | 0.07 | 0 | 0.01 | 0 | 0 | 0.03 | 0.06 | 0.04 | 0.05 |

**age=30 years, timing allo <6 months, cmv=D-/R-, donor=UD, graft=BM, TBI=TBI, In vivo Tcell depletion=yes,**

| Landmark time (y) | GRFS | se   | GF   | se   | AGVHD | se   | CGVHD | se   | Death | se   |
|-------------------|------|------|------|------|-------|------|-------|------|-------|------|
| 0                 | 0.65 | 0.11 | 0.01 | 0.01 | 0.04  | 0.03 | 0.12  | 0.08 | 0.18  | 0.08 |
| 1                 | 0.68 | 0.11 | 0.01 | 0.01 | 0.03  | 0.03 | 0.13  | 0.08 | 0.16  | 0.08 |
| 2                 | 0.69 | 0.12 | 0.01 | 0.01 | 0.01  | 0.02 | 0.14  | 0.09 | 0.15  | 0.08 |
| 3                 | 0.72 | 0.12 | 0.01 | 0.01 | 0     | 0    | 0.14  | 0.1  | 0.14  | 0.08 |
| 4                 | 0.77 | 0.12 | 0    | 0.01 | 0     | 0    | 0.12  | 0.1  | 0.1   | 0.08 |
| 5                 | 0.79 | 0.12 | 0    | 0.01 | 0     | 0    | 0.13  | 0.1  | 0.08  | 0.07 |
| 6                 | 0.83 | 0.12 | 0    | 0.01 | 0     | 0    | 0.09  | 0.1  | 0.07  | 0.07 |
| 7                 | 0.87 | 0.11 | 0    | 0.01 | 0     | 0    | 0.06  | 0.09 | 0.07  | 0.07 |
| 8                 | 0.88 | 0.11 | 0    | 0.01 | 0     | 0    | 0.06  | 0.09 | 0.06  | 0.07 |
| 9                 | 0.88 | 0.11 | 0    | 0.01 | 0     | 0    | 0.06  | 0.09 | 0.06  | 0.07 |
| 10                | 0.89 | 0.1  | 0    | 0.01 | 0     | 0    | 0.05  | 0.08 | 0.06  | 0.07 |
| 11                | 0.9  | 0.1  | 0    | 0.01 | 0     | 0    | 0.05  | 0.08 | 0.05  | 0.06 |
| 12                | 0.9  | 0.1  | 0    | 0.01 | 0     | 0    | 0.05  | 0.08 | 0.05  | 0.07 |

**age=40 years, timing allo <6 months, cmv=D-/R-, donor=UD, graft=BM, TBI=TBI, In vivo Tcell depletion=yes,**

| Landmark time (y) | GRFS | se   | GF   | se   | AGVHD | se   | CGVHD | se   | Death | se   |
|-------------------|------|------|------|------|-------|------|-------|------|-------|------|
| 0                 | 0.54 | 0.13 | 0.01 | 0.01 | 0.05  | 0.05 | 0.16  | 0.11 | 0.25  | 0.1  |
| 1                 | 0.57 | 0.14 | 0.01 | 0.01 | 0.04  | 0.05 | 0.17  | 0.11 | 0.22  | 0.1  |
| 2                 | 0.58 | 0.15 | 0.01 | 0.01 | 0.01  | 0.03 | 0.19  | 0.13 | 0.21  | 0.11 |
| 3                 | 0.62 | 0.15 | 0.01 | 0.01 | 0     | 0    | 0.19  | 0.13 | 0.19  | 0.11 |
| 4                 | 0.68 | 0.16 | 0    | 0.01 | 0     | 0    | 0.17  | 0.14 | 0.14  | 0.11 |
| 5                 | 0.71 | 0.16 | 0    | 0.01 | 0     | 0    | 0.18  | 0.15 | 0.11  | 0.1  |
| 6                 | 0.76 | 0.16 | 0    | 0.01 | 0     | 0    | 0.13  | 0.15 | 0.1   | 0.1  |
| 7                 | 0.82 | 0.15 | 0    | 0.01 | 0     | 0    | 0.08  | 0.13 | 0.1   | 0.1  |
| 8                 | 0.83 | 0.15 | 0    | 0.01 | 0     | 0    | 0.08  | 0.13 | 0.09  | 0.1  |
| 9                 | 0.82 | 0.16 | 0    | 0.01 | 0     | 0    | 0.08  | 0.13 | 0.09  | 0.1  |
| 10                | 0.85 | 0.15 | 0    | 0.01 | 0     | 0    | 0.06  | 0.12 | 0.08  | 0.1  |
| 11                | 0.86 | 0.15 | 0    | 0.01 | 0     | 0    | 0.07  | 0.12 | 0.07  | 0.09 |
| 12                | 0.86 | 0.15 | 0    | 0.01 | 0     | 0    | 0.07  | 0.12 | 0.07  | 0.1  |

**age=50 years, timing allo <6 months, cmv=D-/R-, donor=UD, graft=BM, TBI=TBI, In vivo Tcell depletion=yes,**

| Landmark time (y) | GRFS | se   | GF   | se   | AGVHD | se   | CGVHD | se   | Death | se   |
|-------------------|------|------|------|------|-------|------|-------|------|-------|------|
| 0                 | 0.4  | 0.16 | 0.01 | 0.01 | 0.07  | 0.07 | 0.2   | 0.14 | 0.32  | 0.13 |

|    |      |      |      |      |      |      |      |      |      |      |
|----|------|------|------|------|------|------|------|------|------|------|
| 1  | 0.44 | 0.17 | 0.01 | 0.01 | 0.06 | 0.07 | 0.21 | 0.15 | 0.28 | 0.13 |
| 2  | 0.45 | 0.18 | 0.01 | 0.01 | 0.01 | 0.04 | 0.25 | 0.17 | 0.28 | 0.14 |
| 3  | 0.49 | 0.2  | 0.01 | 0.01 | 0    | 0    | 0.25 | 0.18 | 0.25 | 0.15 |
| 4  | 0.57 | 0.22 | 0.01 | 0.01 | 0    | 0    | 0.24 | 0.2  | 0.19 | 0.15 |
| 5  | 0.6  | 0.22 | 0    | 0.01 | 0    | 0    | 0.25 | 0.21 | 0.14 | 0.14 |
| 6  | 0.67 | 0.23 | 0    | 0.01 | 0    | 0    | 0.19 | 0.22 | 0.13 | 0.14 |
| 7  | 0.75 | 0.23 | 0    | 0.01 | 0    | 0    | 0.12 | 0.19 | 0.13 | 0.15 |
| 8  | 0.76 | 0.23 | 0    | 0.01 | 0    | 0    | 0.12 | 0.19 | 0.12 | 0.14 |
| 9  | 0.75 | 0.23 | 0    | 0.01 | 0    | 0    | 0.12 | 0.2  | 0.12 | 0.15 |
| 10 | 0.79 | 0.22 | 0    | 0.01 | 0    | 0    | 0.09 | 0.18 | 0.11 | 0.14 |
| 11 | 0.8  | 0.22 | 0    | 0.01 | 0    | 0    | 0.09 | 0.18 | 0.1  | 0.14 |
| 12 | 0.8  | 0.22 | 0    | 0.01 | 0    | 0    | 0.1  | 0.19 | 0.1  | 0.14 |

**age=10 years, timing allo >6 months, cmv=others, donor=UD, graft=BM, TBI=TBI, In vivo Tcell depletion=yes,**

| Landmark time (y) | GRFS | se   | GF   | se   | AGVHD | se   | CGVHD | se   | Death | se   |
|-------------------|------|------|------|------|-------|------|-------|------|-------|------|
| 0                 | 0.83 | 0.05 | 0.04 | 0.03 | 0.02  | 0.02 | 0.02  | 0.02 | 0.09  | 0.04 |
| 1                 | 0.85 | 0.05 | 0.04 | 0.03 | 0.01  | 0.02 | 0.02  | 0.02 | 0.08  | 0.04 |
| 2                 | 0.86 | 0.05 | 0.03 | 0.03 | 0     | 0.01 | 0.03  | 0.02 | 0.08  | 0.04 |
| 3                 | 0.88 | 0.05 | 0.03 | 0.03 | 0     | 0    | 0.02  | 0.02 | 0.07  | 0.04 |
| 4                 | 0.91 | 0.05 | 0.02 | 0.02 | 0     | 0    | 0.02  | 0.02 | 0.05  | 0.04 |
| 5                 | 0.92 | 0.04 | 0.02 | 0.02 | 0     | 0    | 0.02  | 0.02 | 0.04  | 0.03 |
| 6                 | 0.94 | 0.04 | 0.01 | 0.02 | 0     | 0    | 0.02  | 0.02 | 0.03  | 0.03 |
| 7                 | 0.95 | 0.04 | 0.01 | 0.02 | 0     | 0    | 0.01  | 0.02 | 0.03  | 0.03 |
| 8                 | 0.95 | 0.04 | 0.01 | 0.02 | 0     | 0    | 0.01  | 0.02 | 0.03  | 0.03 |
| 9                 | 0.95 | 0.04 | 0.01 | 0.02 | 0     | 0    | 0.01  | 0.02 | 0.03  | 0.03 |
| 10                | 0.95 | 0.04 | 0.01 | 0.02 | 0     | 0    | 0.01  | 0.02 | 0.03  | 0.03 |
| 11                | 0.96 | 0.04 | 0.01 | 0.02 | 0     | 0    | 0.01  | 0.02 | 0.02  | 0.03 |
| 12                | 0.96 | 0.04 | 0.01 | 0.02 | 0     | 0    | 0.01  | 0.02 | 0.02  | 0.03 |

**age=20 years, timing allo >6 months, cmv=others, donor=UD, graft=BM, TBI=TBI, In vivo Tcell depletion=yes,**

| Landmark time (y) | GRFS | se   | GF   | se   | AGVHD | se   | CGVHD | se   | Death | se   |
|-------------------|------|------|------|------|-------|------|-------|------|-------|------|
| 0                 | 0.77 | 0.05 | 0.04 | 0.02 | 0.03  | 0.02 | 0.03  | 0.02 | 0.13  | 0.04 |
| 1                 | 0.79 | 0.05 | 0.04 | 0.03 | 0.02  | 0.02 | 0.03  | 0.02 | 0.11  | 0.04 |
| 2                 | 0.82 | 0.06 | 0.03 | 0.03 | 0     | 0.01 | 0.04  | 0.02 | 0.11  | 0.05 |
| 3                 | 0.84 | 0.06 | 0.03 | 0.03 | 0     | 0    | 0.04  | 0.03 | 0.1   | 0.05 |
| 4                 | 0.88 | 0.05 | 0.02 | 0.02 | 0     | 0    | 0.03  | 0.03 | 0.07  | 0.04 |
| 5                 | 0.89 | 0.05 | 0.02 | 0.02 | 0     | 0    | 0.03  | 0.03 | 0.06  | 0.04 |
| 6                 | 0.91 | 0.05 | 0.01 | 0.02 | 0     | 0    | 0.02  | 0.02 | 0.05  | 0.04 |
| 7                 | 0.93 | 0.05 | 0.02 | 0.02 | 0     | 0    | 0.01  | 0.02 | 0.05  | 0.04 |
| 8                 | 0.93 | 0.05 | 0.02 | 0.02 | 0     | 0    | 0.01  | 0.02 | 0.04  | 0.04 |
| 9                 | 0.93 | 0.05 | 0.02 | 0.02 | 0     | 0    | 0.01  | 0.02 | 0.04  | 0.04 |
| 10                | 0.94 | 0.04 | 0.01 | 0.02 | 0     | 0    | 0.01  | 0.02 | 0.04  | 0.04 |
| 11                | 0.94 | 0.04 | 0.01 | 0.02 | 0     | 0    | 0.01  | 0.02 | 0.03  | 0.03 |
| 12                | 0.94 | 0.04 | 0.01 | 0.02 | 0     | 0    | 0.01  | 0.02 | 0.04  | 0.03 |

**age=30 years, timing allo >6 months, cmv=others, donor=UD, graft=BM, TBI=TBI, In vivo Tcell depletion=yes,**

| Landmark time (y) | GRFS | se   | GF   | se   | AGVHD | se   | CGVHD | se   | Death | se   |
|-------------------|------|------|------|------|-------|------|-------|------|-------|------|
| 0                 | 0.7  | 0.06 | 0.04 | 0.02 | 0.04  | 0.02 | 0.04  | 0.03 | 0.18  | 0.05 |
| 1                 | 0.73 | 0.06 | 0.04 | 0.03 | 0.03  | 0.02 | 0.05  | 0.03 | 0.16  | 0.05 |
| 2                 | 0.75 | 0.06 | 0.03 | 0.03 | 0.01  | 0.01 | 0.05  | 0.03 | 0.15  | 0.05 |
| 3                 | 0.78 | 0.06 | 0.04 | 0.03 | 0     | 0    | 0.05  | 0.03 | 0.13  | 0.05 |
| 4                 | 0.83 | 0.06 | 0.02 | 0.02 | 0     | 0    | 0.04  | 0.03 | 0.1   | 0.05 |
| 5                 | 0.86 | 0.06 | 0.02 | 0.02 | 0     | 0    | 0.05  | 0.03 | 0.08  | 0.05 |
| 6                 | 0.88 | 0.06 | 0.02 | 0.02 | 0     | 0    | 0.03  | 0.03 | 0.07  | 0.05 |
| 7                 | 0.9  | 0.05 | 0.02 | 0.02 | 0     | 0    | 0.02  | 0.03 | 0.07  | 0.05 |
| 8                 | 0.9  | 0.05 | 0.02 | 0.02 | 0     | 0    | 0.02  | 0.03 | 0.06  | 0.04 |
| 9                 | 0.9  | 0.06 | 0.02 | 0.02 | 0     | 0    | 0.02  | 0.03 | 0.06  | 0.05 |
| 10                | 0.91 | 0.05 | 0.02 | 0.02 | 0     | 0    | 0.02  | 0.02 | 0.06  | 0.04 |
| 11                | 0.92 | 0.05 | 0.02 | 0.02 | 0     | 0    | 0.02  | 0.02 | 0.05  | 0.04 |
| 12                | 0.92 | 0.05 | 0.01 | 0.02 | 0     | 0    | 0.02  | 0.02 | 0.05  | 0.04 |

**age=40 years, timing allo >6 months, cmv=others, donor=UD, graft=BM, TBI=TBI, In vivo Tcell depletion=yes,**

| Landmark time (y) | GRFS | se   | GF   | se   | AGVHD | se   | CGVHD | se   | Death | se   |
|-------------------|------|------|------|------|-------|------|-------|------|-------|------|
| 0                 | 0.6  | 0.07 | 0.04 | 0.03 | 0.05  | 0.03 | 0.06  | 0.03 | 0.24  | 0.06 |
| 1                 | 0.64 | 0.07 | 0.05 | 0.03 | 0.04  | 0.03 | 0.06  | 0.03 | 0.22  | 0.06 |
| 2                 | 0.67 | 0.07 | 0.04 | 0.03 | 0.01  | 0.02 | 0.07  | 0.04 | 0.21  | 0.07 |
| 3                 | 0.7  | 0.07 | 0.04 | 0.03 | 0     | 0    | 0.07  | 0.04 | 0.19  | 0.07 |
| 4                 | 0.77 | 0.07 | 0.03 | 0.03 | 0     | 0    | 0.06  | 0.04 | 0.14  | 0.06 |
| 5                 | 0.8  | 0.07 | 0.02 | 0.02 | 0     | 0    | 0.07  | 0.04 | 0.11  | 0.06 |
| 6                 | 0.83 | 0.07 | 0.02 | 0.02 | 0     | 0    | 0.05  | 0.04 | 0.1   | 0.06 |
| 7                 | 0.86 | 0.07 | 0.02 | 0.02 | 0     | 0    | 0.03  | 0.03 | 0.09  | 0.06 |
| 8                 | 0.87 | 0.07 | 0.02 | 0.02 | 0     | 0    | 0.03  | 0.03 | 0.09  | 0.06 |
| 9                 | 0.86 | 0.07 | 0.02 | 0.03 | 0     | 0    | 0.03  | 0.03 | 0.09  | 0.06 |
| 10                | 0.88 | 0.07 | 0.02 | 0.02 | 0     | 0    | 0.02  | 0.03 | 0.08  | 0.06 |
| 11                | 0.89 | 0.06 | 0.02 | 0.02 | 0     | 0    | 0.02  | 0.03 | 0.07  | 0.05 |
| 12                | 0.89 | 0.07 | 0.01 | 0.02 | 0     | 0    | 0.02  | 0.03 | 0.07  | 0.06 |

**age=50 years, timing allo >6 months, cmv=others, donor=UD, graft=BM, TBI=TBI, In vivo Tcell depletion=yes,**

| Landmark time (y) | GRFS | se   | GF   | se   | AGVHD | se   | CGVHD | se   | Death | se   |
|-------------------|------|------|------|------|-------|------|-------|------|-------|------|
| 0                 | 0.49 | 0.08 | 0.05 | 0.03 | 0.07  | 0.04 | 0.07  | 0.04 | 0.32  | 0.07 |
| 1                 | 0.53 | 0.08 | 0.05 | 0.03 | 0.06  | 0.04 | 0.08  | 0.04 | 0.29  | 0.08 |
| 2                 | 0.57 | 0.09 | 0.04 | 0.03 | 0.01  | 0.02 | 0.1   | 0.05 | 0.29  | 0.08 |
| 3                 | 0.61 | 0.09 | 0.04 | 0.03 | 0     | 0    | 0.09  | 0.05 | 0.26  | 0.09 |
| 4                 | 0.69 | 0.1  | 0.03 | 0.03 | 0     | 0    | 0.09  | 0.06 | 0.19  | 0.09 |
| 5                 | 0.73 | 0.1  | 0.02 | 0.03 | 0     | 0    | 0.09  | 0.06 | 0.16  | 0.08 |
| 6                 | 0.77 | 0.1  | 0.02 | 0.03 | 0     | 0    | 0.07  | 0.06 | 0.14  | 0.08 |
| 7                 | 0.81 | 0.09 | 0.02 | 0.03 | 0     | 0    | 0.04  | 0.05 | 0.13  | 0.08 |
| 8                 | 0.82 | 0.09 | 0.02 | 0.03 | 0     | 0    | 0.04  | 0.05 | 0.12  | 0.08 |

|    |      |      |      |      |   |   |      |      |      |      |
|----|------|------|------|------|---|---|------|------|------|------|
| 9  | 0.81 | 0.09 | 0.02 | 0.03 | 0 | 0 | 0.04 | 0.05 | 0.12 | 0.08 |
| 10 | 0.84 | 0.09 | 0.02 | 0.03 | 0 | 0 | 0.03 | 0.04 | 0.11 | 0.08 |
| 11 | 0.85 | 0.09 | 0.02 | 0.03 | 0 | 0 | 0.03 | 0.04 | 0.1  | 0.08 |
| 12 | 0.85 | 0.09 | 0.02 | 0.03 | 0 | 0 | 0.03 | 0.05 | 0.1  | 0.08 |

**age=10 years, timing allo <6 months, cmv=others, donor=UD, graft=BM, TBI=TBI, In vivo Tcell depletion=yes,**

| Landmark time (y) | GRFS | se   | GF   | se   | AGVHD | se   | CGVHD | se   | Death | se   |
|-------------------|------|------|------|------|-------|------|-------|------|-------|------|
| 0                 | 0.8  | 0.06 | 0.03 | 0.02 | 0.04  | 0.03 | 0.05  | 0.04 | 0.08  | 0.04 |
| 1                 | 0.82 | 0.06 | 0.03 | 0.02 | 0.03  | 0.03 | 0.05  | 0.04 | 0.07  | 0.04 |
| 2                 | 0.84 | 0.06 | 0.03 | 0.02 | 0.01  | 0.01 | 0.06  | 0.04 | 0.07  | 0.04 |
| 3                 | 0.86 | 0.06 | 0.03 | 0.02 | 0     | 0    | 0.06  | 0.04 | 0.06  | 0.04 |
| 4                 | 0.89 | 0.06 | 0.02 | 0.02 | 0     | 0    | 0.05  | 0.04 | 0.04  | 0.03 |
| 5                 | 0.9  | 0.06 | 0.01 | 0.02 | 0     | 0    | 0.05  | 0.04 | 0.03  | 0.03 |
| 6                 | 0.92 | 0.05 | 0.01 | 0.02 | 0     | 0    | 0.04  | 0.04 | 0.03  | 0.03 |
| 7                 | 0.94 | 0.05 | 0.01 | 0.02 | 0     | 0    | 0.02  | 0.03 | 0.03  | 0.03 |
| 8                 | 0.94 | 0.05 | 0.01 | 0.02 | 0     | 0    | 0.02  | 0.03 | 0.03  | 0.03 |
| 9                 | 0.94 | 0.05 | 0.01 | 0.02 | 0     | 0    | 0.02  | 0.03 | 0.03  | 0.03 |
| 10                | 0.95 | 0.05 | 0.01 | 0.02 | 0     | 0    | 0.02  | 0.03 | 0.02  | 0.03 |
| 11                | 0.95 | 0.04 | 0.01 | 0.02 | 0     | 0    | 0.02  | 0.03 | 0.02  | 0.03 |
| 12                | 0.95 | 0.04 | 0.01 | 0.02 | 0     | 0    | 0.02  | 0.03 | 0.02  | 0.03 |

**age=20 years, timing allo <6 months, cmv=others, donor=UD, graft=BM, TBI=TBI, In vivo Tcell depletion=yes,**

| Landmark time (y) | GRFS | se   | GF   | se   | AGVHD | se   | CGVHD | se   | Death | se   |
|-------------------|------|------|------|------|-------|------|-------|------|-------|------|
| 0                 | 0.73 | 0.07 | 0.04 | 0.02 | 0.05  | 0.04 | 0.07  | 0.04 | 0.11  | 0.04 |
| 1                 | 0.76 | 0.07 | 0.04 | 0.02 | 0.04  | 0.03 | 0.07  | 0.05 | 0.1   | 0.04 |
| 2                 | 0.79 | 0.07 | 0.03 | 0.03 | 0.01  | 0.02 | 0.08  | 0.05 | 0.09  | 0.05 |
| 3                 | 0.81 | 0.07 | 0.03 | 0.03 | 0     | 0    | 0.08  | 0.05 | 0.08  | 0.05 |
| 4                 | 0.85 | 0.07 | 0.02 | 0.02 | 0     | 0    | 0.07  | 0.05 | 0.06  | 0.04 |
| 5                 | 0.87 | 0.07 | 0.02 | 0.02 | 0     | 0    | 0.07  | 0.06 | 0.05  | 0.04 |
| 6                 | 0.89 | 0.07 | 0.01 | 0.02 | 0     | 0    | 0.05  | 0.05 | 0.04  | 0.04 |
| 7                 | 0.91 | 0.06 | 0.01 | 0.02 | 0     | 0    | 0.03  | 0.04 | 0.04  | 0.04 |
| 8                 | 0.92 | 0.06 | 0.01 | 0.02 | 0     | 0    | 0.03  | 0.04 | 0.04  | 0.04 |
| 9                 | 0.92 | 0.06 | 0.01 | 0.02 | 0     | 0    | 0.03  | 0.04 | 0.04  | 0.04 |
| 10                | 0.93 | 0.06 | 0.01 | 0.02 | 0     | 0    | 0.02  | 0.04 | 0.03  | 0.04 |
| 11                | 0.93 | 0.06 | 0.01 | 0.02 | 0     | 0    | 0.02  | 0.04 | 0.03  | 0.04 |
| 12                | 0.93 | 0.06 | 0.01 | 0.02 | 0     | 0    | 0.02  | 0.04 | 0.03  | 0.04 |

**age=30 years, timing allo <6 months, cmv=others, donor=UD, graft=BM, TBI=TBI, In vivo Tcell depletion=yes,**

| Landmark time (y) | GRFS | se   | GF   | se   | AGVHD | se   | CGVHD | se   | Death | se   |
|-------------------|------|------|------|------|-------|------|-------|------|-------|------|
| 0                 | 0.65 | 0.08 | 0.04 | 0.03 | 0.07  | 0.05 | 0.09  | 0.06 | 0.15  | 0.06 |
| 1                 | 0.68 | 0.09 | 0.04 | 0.03 | 0.05  | 0.05 | 0.1   | 0.06 | 0.13  | 0.06 |
| 2                 | 0.71 | 0.09 | 0.03 | 0.03 | 0.01  | 0.03 | 0.12  | 0.07 | 0.13  | 0.06 |
| 3                 | 0.74 | 0.09 | 0.03 | 0.03 | 0     | 0    | 0.11  | 0.07 | 0.11  | 0.06 |
| 4                 | 0.79 | 0.09 | 0.02 | 0.03 | 0     | 0    | 0.1   | 0.07 | 0.09  | 0.06 |

|    |      |      |      |      |   |   |      |      |      |      |
|----|------|------|------|------|---|---|------|------|------|------|
| 5  | 0.81 | 0.09 | 0.02 | 0.02 | 0 | 0 | 0.1  | 0.07 | 0.07 | 0.05 |
| 6  | 0.85 | 0.09 | 0.01 | 0.02 | 0 | 0 | 0.08 | 0.07 | 0.06 | 0.05 |
| 7  | 0.88 | 0.08 | 0.02 | 0.02 | 0 | 0 | 0.05 | 0.06 | 0.06 | 0.05 |
| 8  | 0.89 | 0.08 | 0.02 | 0.02 | 0 | 0 | 0.05 | 0.06 | 0.05 | 0.05 |
| 9  | 0.88 | 0.08 | 0.02 | 0.03 | 0 | 0 | 0.05 | 0.06 | 0.05 | 0.05 |
| 10 | 0.9  | 0.08 | 0.01 | 0.02 | 0 | 0 | 0.04 | 0.05 | 0.05 | 0.05 |
| 11 | 0.91 | 0.07 | 0.01 | 0.02 | 0 | 0 | 0.04 | 0.05 | 0.04 | 0.05 |
| 12 | 0.91 | 0.08 | 0.01 | 0.02 | 0 | 0 | 0.04 | 0.05 | 0.04 | 0.05 |

**age=40 years, timing allo <6 months, cmv=others, donor=UD, graft=BM, TBI=TBI, In vivo Tcell depletion=yes,**

| Landmark time (y) | GRFS | se   | GF   | se   | AGVHD | se   | CGVHD | se   | Death | se   |
|-------------------|------|------|------|------|-------|------|-------|------|-------|------|
| 0                 | 0.54 | 0.1  | 0.04 | 0.03 | 0.09  | 0.06 | 0.12  | 0.07 | 0.2   | 0.07 |
| 1                 | 0.58 | 0.11 | 0.04 | 0.03 | 0.08  | 0.07 | 0.13  | 0.08 | 0.18  | 0.08 |
| 2                 | 0.62 | 0.11 | 0.03 | 0.03 | 0.01  | 0.04 | 0.16  | 0.09 | 0.18  | 0.08 |
| 3                 | 0.65 | 0.12 | 0.03 | 0.03 | 0     | 0    | 0.15  | 0.09 | 0.16  | 0.08 |
| 4                 | 0.72 | 0.12 | 0.02 | 0.03 | 0     | 0    | 0.14  | 0.1  | 0.12  | 0.08 |
| 5                 | 0.74 | 0.12 | 0.02 | 0.03 | 0     | 0    | 0.15  | 0.1  | 0.09  | 0.07 |
| 6                 | 0.79 | 0.12 | 0.02 | 0.03 | 0     | 0    | 0.11  | 0.1  | 0.08  | 0.07 |
| 7                 | 0.84 | 0.11 | 0.02 | 0.03 | 0     | 0    | 0.07  | 0.08 | 0.08  | 0.07 |
| 8                 | 0.84 | 0.11 | 0.02 | 0.03 | 0     | 0    | 0.07  | 0.09 | 0.07  | 0.07 |
| 9                 | 0.84 | 0.11 | 0.02 | 0.03 | 0     | 0    | 0.07  | 0.09 | 0.07  | 0.07 |
| 10                | 0.86 | 0.11 | 0.02 | 0.03 | 0     | 0    | 0.05  | 0.08 | 0.07  | 0.07 |
| 11                | 0.87 | 0.1  | 0.02 | 0.03 | 0     | 0    | 0.05  | 0.08 | 0.06  | 0.07 |
| 12                | 0.87 | 0.11 | 0.01 | 0.03 | 0     | 0    | 0.05  | 0.08 | 0.06  | 0.07 |

**age=50 years, timing allo <6 months, cmv=others, donor=UD, graft=BM, TBI=TBI, In vivo Tcell depletion=yes,**

| Landmark time (y) | GRFS | se   | GF   | se   | AGVHD | se   | CGVHD | se   | Death | se   |
|-------------------|------|------|------|------|-------|------|-------|------|-------|------|
| 0                 | 0.42 | 0.12 | 0.04 | 0.03 | 0.13  | 0.09 | 0.16  | 0.09 | 0.26  | 0.09 |
| 1                 | 0.45 | 0.13 | 0.04 | 0.03 | 0.1   | 0.09 | 0.17  | 0.1  | 0.23  | 0.1  |
| 2                 | 0.5  | 0.14 | 0.03 | 0.03 | 0.02  | 0.05 | 0.21  | 0.12 | 0.24  | 0.11 |
| 3                 | 0.54 | 0.15 | 0.04 | 0.03 | 0     | 0    | 0.21  | 0.13 | 0.21  | 0.11 |
| 4                 | 0.62 | 0.16 | 0.02 | 0.03 | 0     | 0    | 0.19  | 0.14 | 0.16  | 0.11 |
| 5                 | 0.65 | 0.17 | 0.02 | 0.03 | 0     | 0    | 0.2   | 0.15 | 0.13  | 0.1  |
| 6                 | 0.71 | 0.17 | 0.02 | 0.03 | 0     | 0    | 0.15  | 0.15 | 0.11  | 0.11 |
| 7                 | 0.78 | 0.16 | 0.02 | 0.03 | 0     | 0    | 0.09  | 0.13 | 0.11  | 0.11 |
| 8                 | 0.78 | 0.16 | 0.02 | 0.03 | 0     | 0    | 0.09  | 0.13 | 0.1   | 0.11 |
| 9                 | 0.78 | 0.16 | 0.02 | 0.03 | 0     | 0    | 0.1   | 0.13 | 0.1   | 0.11 |
| 10                | 0.81 | 0.16 | 0.02 | 0.03 | 0     | 0    | 0.07  | 0.12 | 0.1   | 0.11 |
| 11                | 0.82 | 0.15 | 0.02 | 0.03 | 0     | 0    | 0.08  | 0.12 | 0.09  | 0.1  |
| 12                | 0.82 | 0.16 | 0.01 | 0.03 | 0     | 0    | 0.08  | 0.13 | 0.09  | 0.1  |

**age=10 years, timing allo >6 months, cmv=D-/R-, donor=MRD, graft=PBSC, TBI=TBI, In vivo Tcell depletion=yes,**

| Landmark time (y) | GRFS | se   | GF | se   | AGVHD | se | CGVHD | se   | Death | se   |
|-------------------|------|------|----|------|-------|----|-------|------|-------|------|
| 0                 | 0.93 | 0.04 | 0  | 0.01 | 0     | 0  | 0.02  | 0.03 | 0.04  | 0.03 |

|    |      |      |   |      |   |   |      |      |      |      |
|----|------|------|---|------|---|---|------|------|------|------|
| 1  | 0.94 | 0.04 | 0 | 0.01 | 0 | 0 | 0.02 | 0.03 | 0.03 | 0.03 |
| 2  | 0.94 | 0.04 | 0 | 0.01 | 0 | 0 | 0.03 | 0.03 | 0.03 | 0.03 |
| 3  | 0.94 | 0.04 | 0 | 0.01 | 0 | 0 | 0.03 | 0.03 | 0.03 | 0.03 |
| 4  | 0.96 | 0.04 | 0 | 0    | 0 | 0 | 0.02 | 0.03 | 0.02 | 0.02 |
| 5  | 0.96 | 0.04 | 0 | 0    | 0 | 0 | 0.02 | 0.03 | 0.02 | 0.02 |
| 6  | 0.97 | 0.04 | 0 | 0    | 0 | 0 | 0.02 | 0.03 | 0.01 | 0.02 |
| 7  | 0.98 | 0.03 | 0 | 0    | 0 | 0 | 0.01 | 0.03 | 0.01 | 0.02 |
| 8  | 0.98 | 0.03 | 0 | 0    | 0 | 0 | 0.01 | 0.03 | 0.01 | 0.02 |
| 9  | 0.98 | 0.03 | 0 | 0    | 0 | 0 | 0.01 | 0.03 | 0.01 | 0.02 |
| 10 | 0.98 | 0.03 | 0 | 0    | 0 | 0 | 0.01 | 0.02 | 0.01 | 0.02 |
| 11 | 0.98 | 0.03 | 0 | 0    | 0 | 0 | 0.01 | 0.02 | 0.01 | 0.02 |
| 12 | 0.98 | 0.03 | 0 | 0    | 0 | 0 | 0.01 | 0.02 | 0.01 | 0.02 |

**age=20 years, timing allo >6 months, cmv=D-/R-, donor=MRD, graft=PBSC, TBI=TBI, In vivo Tcell depletion=yes,**

| Landmark time (y) | GRFS | se   | GF | se   | AGVHD | se | CGVHD | se   | Death | se   |
|-------------------|------|------|----|------|-------|----|-------|------|-------|------|
| 0                 | 0.9  | 0.05 | 0  | 0.01 | 0     | 0  | 0.03  | 0.04 | 0.06  | 0.04 |
| 1                 | 0.91 | 0.05 | 0  | 0.01 | 0     | 0  | 0.03  | 0.04 | 0.05  | 0.04 |
| 2                 | 0.91 | 0.06 | 0  | 0.01 | 0     | 0  | 0.04  | 0.04 | 0.05  | 0.04 |
| 3                 | 0.92 | 0.06 | 0  | 0.01 | 0     | 0  | 0.04  | 0.04 | 0.04  | 0.04 |
| 4                 | 0.94 | 0.05 | 0  | 0.01 | 0     | 0  | 0.03  | 0.04 | 0.03  | 0.03 |
| 5                 | 0.94 | 0.05 | 0  | 0    | 0     | 0  | 0.03  | 0.04 | 0.02  | 0.03 |
| 6                 | 0.96 | 0.05 | 0  | 0    | 0     | 0  | 0.02  | 0.04 | 0.02  | 0.03 |
| 7                 | 0.97 | 0.04 | 0  | 0    | 0     | 0  | 0.01  | 0.03 | 0.02  | 0.03 |
| 8                 | 0.97 | 0.04 | 0  | 0    | 0     | 0  | 0.01  | 0.03 | 0.02  | 0.03 |
| 9                 | 0.97 | 0.04 | 0  | 0    | 0     | 0  | 0.01  | 0.03 | 0.02  | 0.03 |
| 10                | 0.97 | 0.04 | 0  | 0    | 0     | 0  | 0.01  | 0.03 | 0.02  | 0.03 |
| 11                | 0.97 | 0.04 | 0  | 0    | 0     | 0  | 0.01  | 0.03 | 0.01  | 0.03 |
| 12                | 0.97 | 0.04 | 0  | 0    | 0     | 0  | 0.01  | 0.03 | 0.01  | 0.03 |

**age=30 years, timing allo >6 months, cmv=D-/R-, donor=MRD, graft=PBSC, TBI=TBI, In vivo Tcell depletion=yes,**

| Landmark time (y) | GRFS | se   | GF   | se   | AGVHD | se | CGVHD | se   | Death | se   |
|-------------------|------|------|------|------|-------|----|-------|------|-------|------|
| 0                 | 0.86 | 0.07 | 0.01 | 0.01 | 0     | 0  | 0.05  | 0.05 | 0.08  | 0.05 |
| 1                 | 0.87 | 0.07 | 0.01 | 0.01 | 0     | 0  | 0.05  | 0.05 | 0.07  | 0.05 |
| 2                 | 0.87 | 0.07 | 0    | 0.01 | 0     | 0  | 0.06  | 0.06 | 0.07  | 0.05 |
| 3                 | 0.89 | 0.07 | 0    | 0.01 | 0     | 0  | 0.05  | 0.06 | 0.06  | 0.05 |
| 4                 | 0.91 | 0.07 | 0    | 0.01 | 0     | 0  | 0.05  | 0.06 | 0.04  | 0.04 |
| 5                 | 0.92 | 0.07 | 0    | 0.01 | 0     | 0  | 0.05  | 0.06 | 0.03  | 0.04 |
| 6                 | 0.94 | 0.07 | 0    | 0    | 0     | 0  | 0.03  | 0.06 | 0.03  | 0.04 |
| 7                 | 0.95 | 0.06 | 0    | 0.01 | 0     | 0  | 0.02  | 0.05 | 0.03  | 0.04 |
| 8                 | 0.95 | 0.06 | 0    | 0.01 | 0     | 0  | 0.02  | 0.05 | 0.02  | 0.04 |
| 9                 | 0.95 | 0.06 | 0    | 0.01 | 0     | 0  | 0.02  | 0.05 | 0.03  | 0.04 |
| 10                | 0.96 | 0.06 | 0    | 0.01 | 0     | 0  | 0.02  | 0.04 | 0.02  | 0.04 |
| 11                | 0.96 | 0.05 | 0    | 0.01 | 0     | 0  | 0.02  | 0.04 | 0.02  | 0.03 |
| 12                | 0.96 | 0.06 | 0    | 0    | 0     | 0  | 0.02  | 0.04 | 0.02  | 0.04 |

**age=40 years, timing allo >6 months, cmv=D-/R-, donor=MRD, graft=PBSC, TBI=TBI, In vivo Tcell depletion=yes,**

| Landmark time (y) | GRFS | se   | GF   | se   | AGVHD | se | CGVHD | se   | Death | se   |
|-------------------|------|------|------|------|-------|----|-------|------|-------|------|
| 0                 | 0.81 | 0.09 | 0.01 | 0.01 | 0     | 0  | 0.07  | 0.07 | 0.11  | 0.06 |
| 1                 | 0.82 | 0.09 | 0.01 | 0.01 | 0     | 0  | 0.07  | 0.07 | 0.1   | 0.06 |
| 2                 | 0.82 | 0.1  | 0    | 0.01 | 0     | 0  | 0.08  | 0.08 | 0.09  | 0.06 |
| 3                 | 0.84 | 0.1  | 0    | 0.01 | 0     | 0  | 0.08  | 0.08 | 0.08  | 0.06 |
| 4                 | 0.87 | 0.1  | 0    | 0.01 | 0     | 0  | 0.07  | 0.08 | 0.06  | 0.06 |
| 5                 | 0.88 | 0.1  | 0    | 0.01 | 0     | 0  | 0.07  | 0.08 | 0.05  | 0.05 |
| 6                 | 0.91 | 0.09 | 0    | 0.01 | 0     | 0  | 0.05  | 0.08 | 0.04  | 0.05 |
| 7                 | 0.93 | 0.08 | 0    | 0.01 | 0     | 0  | 0.03  | 0.07 | 0.04  | 0.05 |
| 8                 | 0.93 | 0.08 | 0    | 0.01 | 0     | 0  | 0.03  | 0.07 | 0.04  | 0.05 |
| 9                 | 0.93 | 0.08 | 0    | 0.01 | 0     | 0  | 0.03  | 0.07 | 0.04  | 0.05 |
| 10                | 0.94 | 0.08 | 0    | 0.01 | 0     | 0  | 0.02  | 0.06 | 0.03  | 0.05 |
| 11                | 0.95 | 0.08 | 0    | 0.01 | 0     | 0  | 0.02  | 0.06 | 0.03  | 0.05 |
| 12                | 0.95 | 0.08 | 0    | 0.01 | 0     | 0  | 0.02  | 0.06 | 0.03  | 0.05 |

**age=50 years, timing allo >6 months, cmv=D-/R-, donor=MRD, graft=PBSC, TBI=TBI, In vivo Tcell depletion=yes,**

| Landmark time (y) | GRFS | se   | GF   | se   | AGVHD | se | CGVHD | se   | Death | se   |
|-------------------|------|------|------|------|-------|----|-------|------|-------|------|
| 0                 | 0.73 | 0.12 | 0.01 | 0.01 | 0     | 0  | 0.1   | 0.1  | 0.16  | 0.08 |
| 1                 | 0.75 | 0.12 | 0.01 | 0.01 | 0     | 0  | 0.1   | 0.1  | 0.14  | 0.08 |
| 2                 | 0.75 | 0.13 | 0    | 0.01 | 0     | 0  | 0.11  | 0.11 | 0.13  | 0.09 |
| 3                 | 0.77 | 0.13 | 0.01 | 0.01 | 0     | 0  | 0.11  | 0.11 | 0.11  | 0.09 |
| 4                 | 0.82 | 0.13 | 0    | 0.01 | 0     | 0  | 0.09  | 0.11 | 0.08  | 0.08 |
| 5                 | 0.83 | 0.13 | 0    | 0.01 | 0     | 0  | 0.1   | 0.12 | 0.07  | 0.07 |
| 6                 | 0.87 | 0.13 | 0    | 0.01 | 0     | 0  | 0.07  | 0.11 | 0.06  | 0.07 |
| 7                 | 0.9  | 0.12 | 0    | 0.01 | 0     | 0  | 0.04  | 0.09 | 0.06  | 0.07 |
| 8                 | 0.9  | 0.12 | 0    | 0.01 | 0     | 0  | 0.04  | 0.09 | 0.05  | 0.07 |
| 9                 | 0.9  | 0.12 | 0    | 0.01 | 0     | 0  | 0.04  | 0.1  | 0.05  | 0.07 |
| 10                | 0.92 | 0.11 | 0    | 0.01 | 0     | 0  | 0.03  | 0.09 | 0.05  | 0.07 |
| 11                | 0.92 | 0.11 | 0    | 0.01 | 0     | 0  | 0.03  | 0.09 | 0.04  | 0.07 |
| 12                | 0.92 | 0.11 | 0    | 0.01 | 0     | 0  | 0.03  | 0.09 | 0.04  | 0.07 |

**age=10 years, timing allo <6 months, cmv=D-/R-, donor=MRD, graft=PBSC, TBI=TBI, In vivo Tcell depletion=yes,**

| Landmark time (y) | GRFS | se   | GF | se   | AGVHD | se | CGVHD | se   | Death | se   |
|-------------------|------|------|----|------|-------|----|-------|------|-------|------|
| 0                 | 0.91 | 0.07 | 0  | 0.01 | 0     | 0  | 0.05  | 0.07 | 0.03  | 0.02 |
| 1                 | 0.91 | 0.07 | 0  | 0.01 | 0     | 0  | 0.05  | 0.07 | 0.03  | 0.02 |
| 2                 | 0.91 | 0.08 | 0  | 0    | 0     | 0  | 0.06  | 0.07 | 0.03  | 0.02 |
| 3                 | 0.92 | 0.08 | 0  | 0    | 0     | 0  | 0.06  | 0.07 | 0.02  | 0.02 |
| 4                 | 0.93 | 0.08 | 0  | 0    | 0     | 0  | 0.05  | 0.07 | 0.02  | 0.02 |
| 5                 | 0.94 | 0.08 | 0  | 0    | 0     | 0  | 0.05  | 0.07 | 0.01  | 0.02 |
| 6                 | 0.95 | 0.07 | 0  | 0    | 0     | 0  | 0.04  | 0.07 | 0.01  | 0.02 |
| 7                 | 0.97 | 0.06 | 0  | 0    | 0     | 0  | 0.02  | 0.06 | 0.01  | 0.02 |
| 8                 | 0.97 | 0.06 | 0  | 0    | 0     | 0  | 0.02  | 0.06 | 0.01  | 0.02 |



|    |      |      |   |   |   |   |      |      |      |      |
|----|------|------|---|---|---|---|------|------|------|------|
| 9  | 0.97 | 0.06 | 0 | 0 | 0 | 0 | 0.02 | 0.06 | 0.01 | 0.02 |
| 10 | 0.97 | 0.06 | 0 | 0 | 0 | 0 | 0.02 | 0.05 | 0.01 | 0.02 |
| 11 | 0.97 | 0.06 | 0 | 0 | 0 | 0 | 0.02 | 0.05 | 0.01 | 0.02 |
| 12 | 0.97 | 0.06 | 0 | 0 | 0 | 0 | 0.02 | 0.05 | 0.01 | 0.02 |

**age=20 years, timing allo <6 months, cmv=D-/R-, donor=MRD, graft=PBSC, TBI=TBI, In vivo Tcell depletion=yes,**

| Landmark time (y) | GRFS | se   | GF | se   | AGVHD | se | CGVHD | se   | Death | se   |
|-------------------|------|------|----|------|-------|----|-------|------|-------|------|
| 0                 | 0.87 | 0.09 | 0  | 0.01 | 0     | 0  | 0.08  | 0.09 | 0.05  | 0.03 |
| 1                 | 0.87 | 0.1  | 0  | 0.01 | 0     | 0  | 0.08  | 0.09 | 0.04  | 0.03 |
| 2                 | 0.87 | 0.1  | 0  | 0.01 | 0     | 0  | 0.09  | 0.1  | 0.04  | 0.03 |
| 3                 | 0.88 | 0.1  | 0  | 0.01 | 0     | 0  | 0.08  | 0.1  | 0.03  | 0.03 |
| 4                 | 0.9  | 0.1  | 0  | 0    | 0     | 0  | 0.07  | 0.1  | 0.02  | 0.03 |
| 5                 | 0.91 | 0.1  | 0  | 0    | 0     | 0  | 0.07  | 0.1  | 0.02  | 0.03 |
| 6                 | 0.93 | 0.1  | 0  | 0    | 0     | 0  | 0.05  | 0.1  | 0.02  | 0.03 |
| 7                 | 0.95 | 0.09 | 0  | 0    | 0     | 0  | 0.03  | 0.08 | 0.02  | 0.03 |
| 8                 | 0.95 | 0.08 | 0  | 0    | 0     | 0  | 0.03  | 0.08 | 0.01  | 0.02 |
| 9                 | 0.95 | 0.09 | 0  | 0    | 0     | 0  | 0.03  | 0.08 | 0.02  | 0.03 |
| 10                | 0.96 | 0.08 | 0  | 0    | 0     | 0  | 0.02  | 0.07 | 0.01  | 0.02 |
| 11                | 0.96 | 0.08 | 0  | 0    | 0     | 0  | 0.02  | 0.07 | 0.01  | 0.02 |
| 12                | 0.96 | 0.08 | 0  | 0    | 0     | 0  | 0.02  | 0.07 | 0.01  | 0.02 |

**age=30 years, timing allo <6 months, cmv=D-/R-, donor=MRD, graft=PBSC, TBI=TBI, In vivo Tcell depletion=yes,**

| Landmark time (y) | GRFS | se   | GF | se   | AGVHD | se | CGVHD | se   | Death | se   |
|-------------------|------|------|----|------|-------|----|-------|------|-------|------|
| 0                 | 0.81 | 0.13 | 0  | 0.01 | 0     | 0  | 0.11  | 0.12 | 0.07  | 0.04 |
| 1                 | 0.82 | 0.13 | 0  | 0.01 | 0     | 0  | 0.11  | 0.12 | 0.06  | 0.04 |
| 2                 | 0.82 | 0.14 | 0  | 0.01 | 0     | 0  | 0.12  | 0.14 | 0.06  | 0.04 |
| 3                 | 0.83 | 0.14 | 0  | 0.01 | 0     | 0  | 0.12  | 0.14 | 0.05  | 0.04 |
| 4                 | 0.86 | 0.14 | 0  | 0.01 | 0     | 0  | 0.1   | 0.14 | 0.04  | 0.04 |
| 5                 | 0.87 | 0.14 | 0  | 0    | 0     | 0  | 0.1   | 0.14 | 0.03  | 0.04 |
| 6                 | 0.9  | 0.14 | 0  | 0    | 0     | 0  | 0.08  | 0.13 | 0.02  | 0.04 |
| 7                 | 0.93 | 0.12 | 0  | 0    | 0     | 0  | 0.05  | 0.11 | 0.02  | 0.04 |
| 8                 | 0.93 | 0.12 | 0  | 0    | 0     | 0  | 0.05  | 0.12 | 0.02  | 0.03 |
| 9                 | 0.93 | 0.12 | 0  | 0    | 0     | 0  | 0.05  | 0.12 | 0.02  | 0.04 |
| 10                | 0.94 | 0.11 | 0  | 0    | 0     | 0  | 0.04  | 0.1  | 0.02  | 0.03 |
| 11                | 0.95 | 0.11 | 0  | 0    | 0     | 0  | 0.04  | 0.11 | 0.02  | 0.03 |
| 12                | 0.94 | 0.11 | 0  | 0    | 0     | 0  | 0.04  | 0.11 | 0.02  | 0.03 |

**age=40 years, timing allo <6 months, cmv=D-/R-, donor=MRD, graft=PBSC, TBI=TBI, In vivo Tcell depletion=yes,**

| Landmark time (y) | GRFS | se   | GF   | se   | AGVHD | se   | CGVHD | se   | Death | se   |
|-------------------|------|------|------|------|-------|------|-------|------|-------|------|
| 0                 | 0.74 | 0.17 | 0.01 | 0.01 | 0     | 0.01 | 0.15  | 0.17 | 0.1   | 0.06 |
| 1                 | 0.75 | 0.17 | 0.01 | 0.01 | 0     | 0.01 | 0.16  | 0.17 | 0.08  | 0.06 |
| 2                 | 0.74 | 0.19 | 0    | 0.01 | 0     | 0    | 0.17  | 0.18 | 0.08  | 0.06 |
| 3                 | 0.76 | 0.19 | 0    | 0.01 | 0     | 0    | 0.17  | 0.19 | 0.07  | 0.06 |
| 4                 | 0.8  | 0.19 | 0    | 0.01 | 0     | 0    | 0.15  | 0.19 | 0.05  | 0.06 |

|    |      |      |   |      |   |   |      |      |      |      |
|----|------|------|---|------|---|---|------|------|------|------|
| 5  | 0.81 | 0.2  | 0 | 0    | 0 | 0 | 0.15 | 0.19 | 0.04 | 0.05 |
| 6  | 0.85 | 0.19 | 0 | 0    | 0 | 0 | 0.11 | 0.19 | 0.03 | 0.05 |
| 7  | 0.9  | 0.17 | 0 | 0.01 | 0 | 0 | 0.07 | 0.16 | 0.03 | 0.05 |
| 8  | 0.9  | 0.17 | 0 | 0.01 | 0 | 0 | 0.07 | 0.16 | 0.03 | 0.05 |
| 9  | 0.9  | 0.17 | 0 | 0.01 | 0 | 0 | 0.07 | 0.16 | 0.03 | 0.05 |
| 10 | 0.92 | 0.16 | 0 | 0.01 | 0 | 0 | 0.05 | 0.15 | 0.03 | 0.05 |
| 11 | 0.92 | 0.16 | 0 | 0.01 | 0 | 0 | 0.05 | 0.15 | 0.02 | 0.05 |
| 12 | 0.92 | 0.16 | 0 | 0    | 0 | 0 | 0.05 | 0.15 | 0.03 | 0.05 |

**age=50 years, timing allo <6 months, cmv=D-/R-, donor=MRD, graft=PBSC, TBI=TBI, In vivo Tcell depletion=yes,**

| Landmark time (y) | GRFS | se   | GF   | se   | AGVHD | se   | CGVHD | se   | Death | se   |
|-------------------|------|------|------|------|-------|------|-------|------|-------|------|
| 0                 | 0.64 | 0.22 | 0.01 | 0.01 | 0.01  | 0.01 | 0.21  | 0.22 | 0.13  | 0.08 |
| 1                 | 0.66 | 0.23 | 0.01 | 0.01 | 0     | 0.01 | 0.22  | 0.22 | 0.11  | 0.08 |
| 2                 | 0.65 | 0.24 | 0    | 0.01 | 0     | 0    | 0.24  | 0.24 | 0.11  | 0.08 |
| 3                 | 0.67 | 0.25 | 0    | 0.01 | 0     | 0    | 0.23  | 0.25 | 0.09  | 0.08 |
| 4                 | 0.72 | 0.26 | 0    | 0.01 | 0     | 0    | 0.2   | 0.26 | 0.07  | 0.08 |
| 5                 | 0.74 | 0.27 | 0    | 0.01 | 0     | 0    | 0.21  | 0.27 | 0.05  | 0.07 |
| 6                 | 0.79 | 0.26 | 0    | 0.01 | 0     | 0    | 0.16  | 0.27 | 0.05  | 0.07 |
| 7                 | 0.85 | 0.24 | 0    | 0.01 | 0     | 0    | 0.1   | 0.24 | 0.05  | 0.07 |
| 8                 | 0.86 | 0.24 | 0    | 0.01 | 0     | 0    | 0.1   | 0.24 | 0.04  | 0.07 |
| 9                 | 0.86 | 0.24 | 0    | 0.01 | 0     | 0    | 0.1   | 0.24 | 0.04  | 0.07 |
| 10                | 0.88 | 0.22 | 0    | 0.01 | 0     | 0    | 0.08  | 0.22 | 0.04  | 0.07 |
| 11                | 0.89 | 0.22 | 0    | 0.01 | 0     | 0    | 0.08  | 0.22 | 0.04  | 0.07 |
| 12                | 0.89 | 0.22 | 0    | 0.01 | 0     | 0    | 0.08  | 0.22 | 0.04  | 0.07 |

**age=10 years, timing allo >6 months, cmv=others, donor=MRD, graft=PBSC, TBI=TBI, In vivo Tcell depletion=yes,**

| Landmark time (y) | GRFS | se   | GF   | se   | AGVHD | se | CGVHD | se   | Death | se   |
|-------------------|------|------|------|------|-------|----|-------|------|-------|------|
| 0                 | 0.93 | 0.04 | 0.02 | 0.02 | 0     | 0  | 0.02  | 0.02 | 0.03  | 0.02 |
| 1                 | 0.93 | 0.04 | 0.02 | 0.02 | 0     | 0  | 0.02  | 0.02 | 0.03  | 0.02 |
| 2                 | 0.94 | 0.04 | 0.02 | 0.02 | 0     | 0  | 0.02  | 0.03 | 0.03  | 0.02 |
| 3                 | 0.94 | 0.04 | 0.02 | 0.02 | 0     | 0  | 0.02  | 0.03 | 0.02  | 0.02 |
| 4                 | 0.96 | 0.04 | 0.01 | 0.02 | 0     | 0  | 0.02  | 0.03 | 0.02  | 0.02 |
| 5                 | 0.96 | 0.04 | 0.01 | 0.02 | 0     | 0  | 0.02  | 0.03 | 0.01  | 0.02 |
| 6                 | 0.97 | 0.03 | 0.01 | 0.02 | 0     | 0  | 0.01  | 0.02 | 0.01  | 0.02 |
| 7                 | 0.97 | 0.03 | 0.01 | 0.02 | 0     | 0  | 0.01  | 0.02 | 0.01  | 0.02 |
| 8                 | 0.98 | 0.03 | 0.01 | 0.02 | 0     | 0  | 0.01  | 0.02 | 0.01  | 0.02 |
| 9                 | 0.98 | 0.03 | 0.01 | 0.02 | 0     | 0  | 0.01  | 0.02 | 0.01  | 0.02 |
| 10                | 0.98 | 0.03 | 0.01 | 0.02 | 0     | 0  | 0.01  | 0.02 | 0.01  | 0.02 |
| 11                | 0.98 | 0.03 | 0.01 | 0.02 | 0     | 0  | 0.01  | 0.02 | 0.01  | 0.02 |
| 12                | 0.98 | 0.03 | 0.01 | 0.01 | 0     | 0  | 0.01  | 0.02 | 0.01  | 0.02 |

**age=20 years, timing allo >6 months, cmv=others, donor=MRD, graft=PBSC, TBI=TBI, In vivo Tcell depletion=yes,**

| Landmark time (y) | GRFS | se   | GF   | se   | AGVHD | se | CGVHD | se   | Death | se   |
|-------------------|------|------|------|------|-------|----|-------|------|-------|------|
| 0                 | 0.9  | 0.05 | 0.02 | 0.02 | 0     | 0  | 0.03  | 0.03 | 0.05  | 0.03 |

|    |      |      |      |      |   |   |      |      |      |      |
|----|------|------|------|------|---|---|------|------|------|------|
| 1  | 0.91 | 0.05 | 0.02 | 0.02 | 0 | 0 | 0.03 | 0.03 | 0.04 | 0.03 |
| 2  | 0.91 | 0.05 | 0.02 | 0.02 | 0 | 0 | 0.03 | 0.03 | 0.04 | 0.03 |
| 3  | 0.92 | 0.05 | 0.02 | 0.02 | 0 | 0 | 0.03 | 0.03 | 0.03 | 0.03 |
| 4  | 0.94 | 0.05 | 0.01 | 0.02 | 0 | 0 | 0.03 | 0.03 | 0.02 | 0.03 |
| 5  | 0.95 | 0.05 | 0.01 | 0.02 | 0 | 0 | 0.03 | 0.03 | 0.02 | 0.02 |
| 6  | 0.96 | 0.04 | 0.01 | 0.02 | 0 | 0 | 0.02 | 0.03 | 0.02 | 0.02 |
| 7  | 0.97 | 0.04 | 0.01 | 0.02 | 0 | 0 | 0.01 | 0.03 | 0.02 | 0.02 |
| 8  | 0.97 | 0.04 | 0.01 | 0.02 | 0 | 0 | 0.01 | 0.03 | 0.01 | 0.02 |
| 9  | 0.97 | 0.04 | 0.01 | 0.02 | 0 | 0 | 0.01 | 0.03 | 0.01 | 0.02 |
| 10 | 0.97 | 0.04 | 0.01 | 0.02 | 0 | 0 | 0.01 | 0.02 | 0.01 | 0.02 |
| 11 | 0.97 | 0.04 | 0.01 | 0.02 | 0 | 0 | 0.01 | 0.02 | 0.01 | 0.02 |
| 12 | 0.97 | 0.04 | 0.01 | 0.02 | 0 | 0 | 0.01 | 0.02 | 0.01 | 0.02 |

**age=30 years, timing allo >6 months, cmv=others, donor=MRD, graft=PBSC, TBI=TBI, In vivo Tcell depletion=yes,**

| Landmark time (y) | GRFS | se   | GF   | se   | AGVHD | se | CGVHD | se   | Death | se   |
|-------------------|------|------|------|------|-------|----|-------|------|-------|------|
| 0                 | 0.87 | 0.06 | 0.02 | 0.02 | 0     | 0  | 0.04  | 0.04 | 0.07  | 0.04 |
| 1                 | 0.88 | 0.06 | 0.02 | 0.02 | 0     | 0  | 0.04  | 0.04 | 0.06  | 0.04 |
| 2                 | 0.88 | 0.06 | 0.02 | 0.02 | 0     | 0  | 0.04  | 0.05 | 0.06  | 0.04 |
| 3                 | 0.89 | 0.06 | 0.02 | 0.02 | 0     | 0  | 0.04  | 0.05 | 0.05  | 0.04 |
| 4                 | 0.92 | 0.06 | 0.01 | 0.02 | 0     | 0  | 0.04  | 0.05 | 0.04  | 0.04 |
| 5                 | 0.93 | 0.06 | 0.01 | 0.02 | 0     | 0  | 0.04  | 0.05 | 0.03  | 0.03 |
| 6                 | 0.94 | 0.06 | 0.01 | 0.02 | 0     | 0  | 0.03  | 0.04 | 0.02  | 0.03 |
| 7                 | 0.95 | 0.05 | 0.01 | 0.02 | 0     | 0  | 0.02  | 0.04 | 0.02  | 0.03 |
| 8                 | 0.95 | 0.05 | 0.01 | 0.02 | 0     | 0  | 0.02  | 0.04 | 0.02  | 0.03 |
| 9                 | 0.95 | 0.05 | 0.01 | 0.02 | 0     | 0  | 0.02  | 0.04 | 0.02  | 0.03 |
| 10                | 0.96 | 0.05 | 0.01 | 0.02 | 0     | 0  | 0.01  | 0.03 | 0.02  | 0.03 |
| 11                | 0.96 | 0.05 | 0.01 | 0.02 | 0     | 0  | 0.01  | 0.03 | 0.02  | 0.03 |
| 12                | 0.96 | 0.05 | 0.01 | 0.02 | 0     | 0  | 0.01  | 0.03 | 0.02  | 0.03 |

**age=40 years, timing allo >6 months, cmv=others, donor=MRD, graft=PBSC, TBI=TBI, In vivo Tcell depletion=yes,**

| Landmark time (y) | GRFS | se   | GF   | se   | AGVHD | se   | CGVHD | se   | Death | se   |
|-------------------|------|------|------|------|-------|------|-------|------|-------|------|
| 0                 | 0.82 | 0.07 | 0.03 | 0.02 | 0     | 0.01 | 0.06  | 0.05 | 0.09  | 0.05 |
| 1                 | 0.83 | 0.07 | 0.03 | 0.02 | 0     | 0.01 | 0.06  | 0.05 | 0.08  | 0.05 |
| 2                 | 0.84 | 0.08 | 0.02 | 0.02 | 0     | 0    | 0.06  | 0.06 | 0.08  | 0.05 |
| 3                 | 0.85 | 0.08 | 0.02 | 0.02 | 0     | 0    | 0.06  | 0.06 | 0.07  | 0.05 |
| 4                 | 0.88 | 0.08 | 0.01 | 0.02 | 0     | 0    | 0.05  | 0.06 | 0.05  | 0.05 |
| 5                 | 0.9  | 0.08 | 0.01 | 0.02 | 0     | 0    | 0.05  | 0.06 | 0.04  | 0.04 |
| 6                 | 0.92 | 0.07 | 0.01 | 0.02 | 0     | 0    | 0.04  | 0.06 | 0.03  | 0.04 |
| 7                 | 0.93 | 0.07 | 0.01 | 0.02 | 0     | 0    | 0.02  | 0.05 | 0.03  | 0.04 |
| 8                 | 0.94 | 0.06 | 0.01 | 0.02 | 0     | 0    | 0.02  | 0.05 | 0.03  | 0.04 |
| 9                 | 0.94 | 0.07 | 0.01 | 0.02 | 0     | 0    | 0.02  | 0.05 | 0.03  | 0.04 |
| 10                | 0.95 | 0.06 | 0.01 | 0.02 | 0     | 0    | 0.02  | 0.04 | 0.03  | 0.04 |
| 11                | 0.95 | 0.06 | 0.01 | 0.02 | 0     | 0    | 0.02  | 0.05 | 0.02  | 0.04 |
| 12                | 0.95 | 0.06 | 0.01 | 0.02 | 0     | 0    | 0.02  | 0.05 | 0.03  | 0.04 |

**age=50 years, timing allo >6 months, cmv=others, donor=MRD, graft=PBSC, TBI=TBI, In vivo Tcell depletion=yes,**

| Landmark time (y) | GRFS | se   | GF   | se   | AGVHD | se   | CGVHD | se   | Death | se   |
|-------------------|------|------|------|------|-------|------|-------|------|-------|------|
| 0                 | 0.75 | 0.09 | 0.03 | 0.02 | 0.01  | 0.01 | 0.08  | 0.07 | 0.13  | 0.07 |
| 1                 | 0.77 | 0.1  | 0.03 | 0.02 | 0     | 0.01 | 0.08  | 0.07 | 0.12  | 0.07 |
| 2                 | 0.78 | 0.1  | 0.02 | 0.02 | 0     | 0    | 0.09  | 0.08 | 0.11  | 0.07 |
| 3                 | 0.8  | 0.1  | 0.02 | 0.02 | 0     | 0    | 0.09  | 0.08 | 0.1   | 0.07 |
| 4                 | 0.84 | 0.1  | 0.01 | 0.02 | 0     | 0    | 0.08  | 0.08 | 0.07  | 0.06 |
| 5                 | 0.85 | 0.1  | 0.01 | 0.02 | 0     | 0    | 0.08  | 0.09 | 0.06  | 0.06 |
| 6                 | 0.88 | 0.1  | 0.01 | 0.02 | 0     | 0    | 0.06  | 0.08 | 0.05  | 0.06 |
| 7                 | 0.91 | 0.09 | 0.01 | 0.02 | 0     | 0    | 0.03  | 0.07 | 0.05  | 0.06 |
| 8                 | 0.91 | 0.09 | 0.01 | 0.02 | 0     | 0    | 0.03  | 0.07 | 0.04  | 0.05 |
| 9                 | 0.91 | 0.09 | 0.01 | 0.02 | 0     | 0    | 0.03  | 0.07 | 0.04  | 0.06 |
| 10                | 0.92 | 0.08 | 0.01 | 0.02 | 0     | 0    | 0.03  | 0.06 | 0.04  | 0.05 |
| 11                | 0.93 | 0.08 | 0.01 | 0.02 | 0     | 0    | 0.03  | 0.06 | 0.04  | 0.05 |
| 12                | 0.93 | 0.08 | 0.01 | 0.02 | 0     | 0    | 0.03  | 0.06 | 0.04  | 0.05 |

**age=10 years, timing allo <6 months, cmv=others, donor=MRD, graft=PBSC, TBI=TBI, In vivo Tcell depletion=yes,**

| Landmark time (y) | GRFS | se   | GF   | se   | AGVHD | se | CGVHD | se   | Death | se   |
|-------------------|------|------|------|------|-------|----|-------|------|-------|------|
| 0                 | 0.91 | 0.06 | 0.02 | 0.02 | 0     | 0  | 0.04  | 0.05 | 0.03  | 0.02 |
| 1                 | 0.91 | 0.06 | 0.02 | 0.02 | 0     | 0  | 0.04  | 0.05 | 0.02  | 0.02 |
| 2                 | 0.91 | 0.06 | 0.01 | 0.02 | 0     | 0  | 0.05  | 0.06 | 0.02  | 0.02 |
| 3                 | 0.92 | 0.06 | 0.01 | 0.02 | 0     | 0  | 0.05  | 0.06 | 0.02  | 0.02 |
| 4                 | 0.94 | 0.06 | 0.01 | 0.02 | 0     | 0  | 0.04  | 0.06 | 0.01  | 0.02 |
| 5                 | 0.94 | 0.06 | 0.01 | 0.01 | 0     | 0  | 0.04  | 0.06 | 0.01  | 0.02 |
| 6                 | 0.96 | 0.06 | 0.01 | 0.01 | 0     | 0  | 0.03  | 0.05 | 0.01  | 0.02 |
| 7                 | 0.97 | 0.05 | 0.01 | 0.01 | 0     | 0  | 0.02  | 0.05 | 0.01  | 0.02 |
| 8                 | 0.97 | 0.05 | 0.01 | 0.01 | 0     | 0  | 0.02  | 0.05 | 0.01  | 0.01 |
| 9                 | 0.97 | 0.05 | 0.01 | 0.02 | 0     | 0  | 0.02  | 0.05 | 0.01  | 0.02 |
| 10                | 0.97 | 0.05 | 0.01 | 0.01 | 0     | 0  | 0.01  | 0.04 | 0.01  | 0.01 |
| 11                | 0.97 | 0.05 | 0.01 | 0.01 | 0     | 0  | 0.01  | 0.04 | 0.01  | 0.01 |
| 12                | 0.97 | 0.05 | 0    | 0.01 | 0     | 0  | 0.01  | 0.04 | 0.01  | 0.01 |

**age=20 years, timing allo <6 months, cmv=others, donor=MRD, graft=PBSC, TBI=TBI, In vivo Tcell depletion=yes,**

| Landmark time (y) | GRFS | se   | GF   | se   | AGVHD | se   | CGVHD | se   | Death | se   |
|-------------------|------|------|------|------|-------|------|-------|------|-------|------|
| 0                 | 0.87 | 0.07 | 0.02 | 0.02 | 0     | 0.01 | 0.06  | 0.07 | 0.04  | 0.03 |
| 1                 | 0.88 | 0.08 | 0.02 | 0.02 | 0     | 0.01 | 0.06  | 0.07 | 0.03  | 0.03 |
| 2                 | 0.88 | 0.08 | 0.02 | 0.02 | 0     | 0    | 0.07  | 0.08 | 0.03  | 0.03 |
| 3                 | 0.89 | 0.08 | 0.02 | 0.02 | 0     | 0    | 0.07  | 0.08 | 0.03  | 0.03 |
| 4                 | 0.91 | 0.08 | 0.01 | 0.02 | 0     | 0    | 0.06  | 0.08 | 0.02  | 0.02 |
| 5                 | 0.92 | 0.08 | 0.01 | 0.02 | 0     | 0    | 0.06  | 0.08 | 0.02  | 0.02 |
| 6                 | 0.94 | 0.08 | 0.01 | 0.01 | 0     | 0    | 0.04  | 0.07 | 0.01  | 0.02 |
| 7                 | 0.95 | 0.07 | 0.01 | 0.02 | 0     | 0    | 0.03  | 0.06 | 0.01  | 0.02 |
| 8                 | 0.96 | 0.07 | 0.01 | 0.02 | 0     | 0    | 0.03  | 0.06 | 0.01  | 0.02 |

|    |      |      |      |      |   |   |      |      |      |      |
|----|------|------|------|------|---|---|------|------|------|------|
| 9  | 0.95 | 0.07 | 0.01 | 0.02 | 0 | 0 | 0.03 | 0.06 | 0.01 | 0.02 |
| 10 | 0.96 | 0.06 | 0.01 | 0.02 | 0 | 0 | 0.02 | 0.06 | 0.01 | 0.02 |
| 11 | 0.96 | 0.06 | 0.01 | 0.02 | 0 | 0 | 0.02 | 0.06 | 0.01 | 0.02 |
| 12 | 0.96 | 0.06 | 0.01 | 0.01 | 0 | 0 | 0.02 | 0.06 | 0.01 | 0.02 |

**age=30 years, timing allo <6 months, cmv=others, donor=MRD, graft=PBSC, TBI=TBI, In vivo Tcell depletion=yes,**

| Landmark time (y) | GRFS | se   | GF   | se   | AGVHD | se   | CGVHD | se   | Death | se   |
|-------------------|------|------|------|------|-------|------|-------|------|-------|------|
| 0                 | 0.83 | 0.1  | 0.02 | 0.02 | 0.01  | 0.01 | 0.09  | 0.09 | 0.06  | 0.04 |
| 1                 | 0.84 | 0.1  | 0.02 | 0.02 | 0     | 0.01 | 0.09  | 0.09 | 0.05  | 0.03 |
| 2                 | 0.84 | 0.11 | 0.02 | 0.02 | 0     | 0    | 0.1   | 0.1  | 0.05  | 0.04 |
| 3                 | 0.85 | 0.11 | 0.02 | 0.02 | 0     | 0    | 0.09  | 0.1  | 0.04  | 0.04 |
| 4                 | 0.88 | 0.11 | 0.01 | 0.02 | 0     | 0    | 0.08  | 0.1  | 0.03  | 0.03 |
| 5                 | 0.89 | 0.11 | 0.01 | 0.02 | 0     | 0    | 0.08  | 0.11 | 0.02  | 0.03 |
| 6                 | 0.91 | 0.1  | 0.01 | 0.02 | 0     | 0    | 0.06  | 0.1  | 0.02  | 0.03 |
| 7                 | 0.94 | 0.09 | 0.01 | 0.02 | 0     | 0    | 0.04  | 0.09 | 0.02  | 0.03 |
| 8                 | 0.94 | 0.09 | 0.01 | 0.02 | 0     | 0    | 0.04  | 0.09 | 0.02  | 0.03 |
| 9                 | 0.94 | 0.09 | 0.01 | 0.02 | 0     | 0    | 0.04  | 0.09 | 0.02  | 0.03 |
| 10                | 0.95 | 0.08 | 0.01 | 0.02 | 0     | 0    | 0.03  | 0.08 | 0.02  | 0.03 |
| 11                | 0.95 | 0.08 | 0.01 | 0.02 | 0     | 0    | 0.03  | 0.08 | 0.01  | 0.03 |
| 12                | 0.95 | 0.08 | 0.01 | 0.01 | 0     | 0    | 0.03  | 0.08 | 0.02  | 0.03 |

**age=40 years, timing allo <6 months, cmv=others, donor=MRD, graft=PBSC, TBI=TBI, In vivo Tcell depletion=yes,**

| Landmark time (y) | GRFS | se   | GF   | se   | AGVHD | se   | CGVHD | se   | Death | se   |
|-------------------|------|------|------|------|-------|------|-------|------|-------|------|
| 0                 | 0.76 | 0.13 | 0.02 | 0.02 | 0.01  | 0.01 | 0.12  | 0.12 | 0.08  | 0.05 |
| 1                 | 0.77 | 0.13 | 0.02 | 0.02 | 0.01  | 0.01 | 0.13  | 0.13 | 0.07  | 0.05 |
| 2                 | 0.77 | 0.14 | 0.02 | 0.02 | 0     | 0.01 | 0.14  | 0.14 | 0.07  | 0.05 |
| 3                 | 0.79 | 0.14 | 0.02 | 0.02 | 0     | 0    | 0.13  | 0.14 | 0.06  | 0.05 |
| 4                 | 0.83 | 0.15 | 0.01 | 0.02 | 0     | 0    | 0.12  | 0.14 | 0.04  | 0.04 |
| 5                 | 0.84 | 0.15 | 0.01 | 0.02 | 0     | 0    | 0.12  | 0.15 | 0.03  | 0.04 |
| 6                 | 0.87 | 0.14 | 0.01 | 0.02 | 0     | 0    | 0.09  | 0.14 | 0.03  | 0.04 |
| 7                 | 0.91 | 0.13 | 0.01 | 0.02 | 0     | 0    | 0.05  | 0.12 | 0.03  | 0.04 |
| 8                 | 0.91 | 0.13 | 0.01 | 0.02 | 0     | 0    | 0.05  | 0.12 | 0.03  | 0.04 |
| 9                 | 0.91 | 0.13 | 0.01 | 0.02 | 0     | 0    | 0.05  | 0.12 | 0.03  | 0.04 |
| 10                | 0.93 | 0.12 | 0.01 | 0.02 | 0     | 0    | 0.04  | 0.11 | 0.02  | 0.04 |
| 11                | 0.93 | 0.12 | 0.01 | 0.02 | 0     | 0    | 0.04  | 0.11 | 0.02  | 0.04 |
| 12                | 0.93 | 0.12 | 0.01 | 0.02 | 0     | 0    | 0.04  | 0.11 | 0.02  | 0.04 |

**age=50 years, timing allo <6 months, cmv=others, donor=MRD, graft=PBSC, TBI=TBI, In vivo Tcell depletion=yes,**

| Landmark time (y) | GRFS | se   | GF   | se   | AGVHD | se   | CGVHD | se   | Death | se   |
|-------------------|------|------|------|------|-------|------|-------|------|-------|------|
| 0                 | 0.68 | 0.17 | 0.03 | 0.02 | 0.01  | 0.01 | 0.17  | 0.16 | 0.11  | 0.06 |
| 1                 | 0.69 | 0.17 | 0.03 | 0.02 | 0.01  | 0.01 | 0.18  | 0.17 | 0.1   | 0.06 |
| 2                 | 0.69 | 0.19 | 0.02 | 0.02 | 0     | 0.01 | 0.2   | 0.18 | 0.09  | 0.07 |
| 3                 | 0.71 | 0.19 | 0.02 | 0.02 | 0     | 0    | 0.19  | 0.19 | 0.08  | 0.06 |
| 4                 | 0.76 | 0.2  | 0.01 | 0.02 | 0     | 0    | 0.17  | 0.2  | 0.06  | 0.06 |

|    |      |      |      |      |   |   |      |      |      |      |
|----|------|------|------|------|---|---|------|------|------|------|
| 5  | 0.77 | 0.2  | 0.01 | 0.02 | 0 | 0 | 0.17 | 0.2  | 0.05 | 0.06 |
| 6  | 0.82 | 0.2  | 0.01 | 0.02 | 0 | 0 | 0.13 | 0.2  | 0.04 | 0.05 |
| 7  | 0.87 | 0.18 | 0.01 | 0.02 | 0 | 0 | 0.08 | 0.17 | 0.04 | 0.06 |
| 8  | 0.88 | 0.18 | 0.01 | 0.02 | 0 | 0 | 0.08 | 0.17 | 0.04 | 0.05 |
| 9  | 0.87 | 0.18 | 0.01 | 0.02 | 0 | 0 | 0.08 | 0.17 | 0.04 | 0.05 |
| 10 | 0.9  | 0.16 | 0.01 | 0.02 | 0 | 0 | 0.06 | 0.16 | 0.03 | 0.05 |
| 11 | 0.9  | 0.16 | 0.01 | 0.02 | 0 | 0 | 0.06 | 0.16 | 0.03 | 0.05 |
| 12 | 0.9  | 0.17 | 0.01 | 0.02 | 0 | 0 | 0.06 | 0.16 | 0.03 | 0.05 |

**age=10 years, timing allo >6 months, cmv=D-/R-, donor=UD, graft=PBSC, TBI=TBI, In vivo Tcell depletion=yes,**

| Landmark time (y) | GRFS | se   | GF | se | AGVHD | se   | CGVHD | se   | Death | se   |
|-------------------|------|------|----|----|-------|------|-------|------|-------|------|
| 0                 | 0.89 | 0.05 | 0  | 0  | 0.01  | 0.01 | 0.02  | 0.03 | 0.07  | 0.04 |
| 1                 | 0.9  | 0.05 | 0  | 0  | 0     | 0.01 | 0.03  | 0.03 | 0.06  | 0.04 |
| 2                 | 0.91 | 0.05 | 0  | 0  | 0     | 0    | 0.03  | 0.03 | 0.06  | 0.04 |
| 3                 | 0.92 | 0.05 | 0  | 0  | 0     | 0    | 0.03  | 0.03 | 0.05  | 0.04 |
| 4                 | 0.94 | 0.05 | 0  | 0  | 0     | 0    | 0.02  | 0.03 | 0.04  | 0.04 |
| 5                 | 0.95 | 0.04 | 0  | 0  | 0     | 0    | 0.02  | 0.03 | 0.03  | 0.03 |
| 6                 | 0.96 | 0.04 | 0  | 0  | 0     | 0    | 0.02  | 0.03 | 0.03  | 0.03 |
| 7                 | 0.96 | 0.04 | 0  | 0  | 0     | 0    | 0.01  | 0.02 | 0.02  | 0.03 |
| 8                 | 0.97 | 0.04 | 0  | 0  | 0     | 0    | 0.01  | 0.02 | 0.02  | 0.03 |
| 9                 | 0.97 | 0.04 | 0  | 0  | 0     | 0    | 0.01  | 0.02 | 0.02  | 0.03 |
| 10                | 0.97 | 0.04 | 0  | 0  | 0     | 0    | 0.01  | 0.02 | 0.02  | 0.03 |
| 11                | 0.97 | 0.03 | 0  | 0  | 0     | 0    | 0.01  | 0.02 | 0.02  | 0.03 |
| 12                | 0.97 | 0.03 | 0  | 0  | 0     | 0    | 0.01  | 0.02 | 0.02  | 0.03 |

**age=20 years, timing allo >6 months, cmv=D-/R-, donor=UD, graft=PBSC, TBI=TBI, In vivo Tcell depletion=yes,**

| Landmark time (y) | GRFS | se   | GF | se | AGVHD | se   | CGVHD | se   | Death | se   |
|-------------------|------|------|----|----|-------|------|-------|------|-------|------|
| 0                 | 0.85 | 0.06 | 0  | 0  | 0.01  | 0.01 | 0.04  | 0.03 | 0.1   | 0.05 |
| 1                 | 0.86 | 0.06 | 0  | 0  | 0.01  | 0.01 | 0.04  | 0.03 | 0.09  | 0.05 |
| 2                 | 0.87 | 0.06 | 0  | 0  | 0     | 0    | 0.04  | 0.04 | 0.09  | 0.05 |
| 3                 | 0.88 | 0.06 | 0  | 0  | 0     | 0    | 0.04  | 0.04 | 0.07  | 0.05 |
| 4                 | 0.91 | 0.06 | 0  | 0  | 0     | 0    | 0.03  | 0.04 | 0.05  | 0.05 |
| 5                 | 0.92 | 0.06 | 0  | 0  | 0     | 0    | 0.03  | 0.04 | 0.04  | 0.04 |
| 6                 | 0.94 | 0.05 | 0  | 0  | 0     | 0    | 0.02  | 0.03 | 0.04  | 0.04 |
| 7                 | 0.95 | 0.05 | 0  | 0  | 0     | 0    | 0.01  | 0.03 | 0.04  | 0.04 |
| 8                 | 0.95 | 0.05 | 0  | 0  | 0     | 0    | 0.01  | 0.03 | 0.03  | 0.04 |
| 9                 | 0.95 | 0.05 | 0  | 0  | 0     | 0    | 0.01  | 0.03 | 0.03  | 0.04 |
| 10                | 0.96 | 0.05 | 0  | 0  | 0     | 0    | 0.01  | 0.03 | 0.03  | 0.04 |
| 11                | 0.96 | 0.04 | 0  | 0  | 0     | 0    | 0.01  | 0.03 | 0.03  | 0.04 |
| 12                | 0.96 | 0.05 | 0  | 0  | 0     | 0    | 0.01  | 0.03 | 0.03  | 0.04 |

**age=30 years, timing allo >6 months, cmv=D-/R-, donor=UD, graft=PBSC, TBI=TBI, In vivo Tcell depletion=yes,**

| Landmark time (y) | GRFS | se   | GF | se | AGVHD | se   | CGVHD | se   | Death | se   |
|-------------------|------|------|----|----|-------|------|-------|------|-------|------|
| 0                 | 0.79 | 0.07 | 0  | 0  | 0.01  | 0.01 | 0.05  | 0.04 | 0.14  | 0.06 |

|    |      |      |   |   |      |      |      |      |      |      |
|----|------|------|---|---|------|------|------|------|------|------|
| 1  | 0.81 | 0.07 | 0 | 0 | 0.01 | 0.01 | 0.05 | 0.04 | 0.13 | 0.06 |
| 2  | 0.82 | 0.08 | 0 | 0 | 0    | 0.01 | 0.06 | 0.05 | 0.12 | 0.06 |
| 3  | 0.84 | 0.08 | 0 | 0 | 0    | 0    | 0.05 | 0.05 | 0.11 | 0.06 |
| 4  | 0.87 | 0.07 | 0 | 0 | 0    | 0    | 0.05 | 0.05 | 0.08 | 0.06 |
| 5  | 0.89 | 0.07 | 0 | 0 | 0    | 0    | 0.05 | 0.05 | 0.06 | 0.06 |
| 6  | 0.91 | 0.07 | 0 | 0 | 0    | 0    | 0.04 | 0.05 | 0.05 | 0.05 |
| 7  | 0.93 | 0.06 | 0 | 0 | 0    | 0    | 0.02 | 0.04 | 0.05 | 0.05 |
| 8  | 0.93 | 0.06 | 0 | 0 | 0    | 0    | 0.02 | 0.04 | 0.05 | 0.05 |
| 9  | 0.93 | 0.06 | 0 | 0 | 0    | 0    | 0.02 | 0.04 | 0.05 | 0.05 |
| 10 | 0.94 | 0.06 | 0 | 0 | 0    | 0    | 0.02 | 0.03 | 0.04 | 0.05 |
| 11 | 0.94 | 0.06 | 0 | 0 | 0    | 0    | 0.02 | 0.04 | 0.04 | 0.05 |
| 12 | 0.94 | 0.06 | 0 | 0 | 0    | 0    | 0.02 | 0.04 | 0.04 | 0.05 |

**age=40 years, timing allo >6 months, cmv=D-/R-, donor=UD, graft=PBSC, TBI=TBI, In vivo Tcell depletion=yes,**

| Landmark time (y) | GRFS | se   | GF | se   | AGVHD | se   | CGVHD | se   | Death | se   |
|-------------------|------|------|----|------|-------|------|-------|------|-------|------|
| 0                 | 0.71 | 0.09 | 0  | 0    | 0.02  | 0.02 | 0.07  | 0.05 | 0.2   | 0.08 |
| 1                 | 0.73 | 0.09 | 0  | 0    | 0.01  | 0.02 | 0.07  | 0.05 | 0.18  | 0.08 |
| 2                 | 0.75 | 0.1  | 0  | 0    | 0     | 0.01 | 0.08  | 0.06 | 0.17  | 0.08 |
| 3                 | 0.77 | 0.1  | 0  | 0.01 | 0     | 0    | 0.08  | 0.06 | 0.15  | 0.08 |
| 4                 | 0.82 | 0.1  | 0  | 0    | 0     | 0    | 0.07  | 0.06 | 0.11  | 0.08 |
| 5                 | 0.84 | 0.09 | 0  | 0    | 0     | 0    | 0.07  | 0.07 | 0.09  | 0.07 |
| 6                 | 0.87 | 0.09 | 0  | 0    | 0     | 0    | 0.05  | 0.06 | 0.08  | 0.07 |
| 7                 | 0.9  | 0.09 | 0  | 0    | 0     | 0    | 0.03  | 0.05 | 0.07  | 0.07 |
| 8                 | 0.9  | 0.08 | 0  | 0    | 0     | 0    | 0.03  | 0.05 | 0.07  | 0.07 |
| 9                 | 0.9  | 0.09 | 0  | 0    | 0     | 0    | 0.03  | 0.05 | 0.07  | 0.07 |
| 10                | 0.91 | 0.08 | 0  | 0    | 0     | 0    | 0.02  | 0.05 | 0.06  | 0.07 |
| 11                | 0.92 | 0.08 | 0  | 0    | 0     | 0    | 0.02  | 0.05 | 0.05  | 0.06 |
| 12                | 0.92 | 0.08 | 0  | 0    | 0     | 0    | 0.02  | 0.05 | 0.06  | 0.07 |

**age=50 years, timing allo >6 months, cmv=D-/R-, donor=UD, graft=PBSC, TBI=TBI, In vivo Tcell depletion=yes,**

| Landmark time (y) | GRFS | se   | GF | se   | AGVHD | se   | CGVHD | se   | Death | se   |
|-------------------|------|------|----|------|-------|------|-------|------|-------|------|
| 0                 | 0.61 | 0.11 | 0  | 0    | 0.02  | 0.02 | 0.09  | 0.07 | 0.27  | 0.1  |
| 1                 | 0.64 | 0.12 | 0  | 0.01 | 0.02  | 0.02 | 0.1   | 0.07 | 0.24  | 0.1  |
| 2                 | 0.65 | 0.12 | 0  | 0.01 | 0     | 0.01 | 0.11  | 0.08 | 0.23  | 0.11 |
| 3                 | 0.69 | 0.13 | 0  | 0.01 | 0     | 0    | 0.11  | 0.08 | 0.2   | 0.11 |
| 4                 | 0.75 | 0.13 | 0  | 0    | 0     | 0    | 0.1   | 0.09 | 0.15  | 0.11 |
| 5                 | 0.78 | 0.13 | 0  | 0    | 0     | 0    | 0.1   | 0.09 | 0.12  | 0.1  |
| 6                 | 0.82 | 0.12 | 0  | 0    | 0     | 0    | 0.07  | 0.09 | 0.11  | 0.1  |
| 7                 | 0.85 | 0.12 | 0  | 0    | 0     | 0    | 0.04  | 0.07 | 0.1   | 0.1  |
| 8                 | 0.86 | 0.12 | 0  | 0    | 0     | 0    | 0.05  | 0.07 | 0.09  | 0.09 |
| 9                 | 0.86 | 0.12 | 0  | 0    | 0     | 0    | 0.05  | 0.08 | 0.1   | 0.1  |
| 10                | 0.88 | 0.11 | 0  | 0    | 0     | 0    | 0.04  | 0.07 | 0.09  | 0.09 |
| 11                | 0.88 | 0.11 | 0  | 0    | 0     | 0    | 0.04  | 0.07 | 0.08  | 0.09 |
| 12                | 0.88 | 0.11 | 0  | 0    | 0     | 0    | 0.04  | 0.07 | 0.08  | 0.09 |

**age=10 years, timing allo <6 months, cmv=D-/R-, donor=UD, graft=PBSC, TBI=TBI, In vivo Tcell depletion=yes,**

| Landmark time (y) | GRFS | se   | GF | se | AGVHD | se   | CGVHD | se   | Death | se   |
|-------------------|------|------|----|----|-------|------|-------|------|-------|------|
| 0                 | 0.87 | 0.07 | 0  | 0  | 0.01  | 0.01 | 0.06  | 0.06 | 0.06  | 0.04 |
| 1                 | 0.88 | 0.07 | 0  | 0  | 0.01  | 0.01 | 0.06  | 0.06 | 0.05  | 0.04 |
| 2                 | 0.88 | 0.07 | 0  | 0  | 0     | 0.01 | 0.06  | 0.07 | 0.05  | 0.04 |
| 3                 | 0.89 | 0.07 | 0  | 0  | 0     | 0    | 0.06  | 0.07 | 0.04  | 0.04 |
| 4                 | 0.91 | 0.07 | 0  | 0  | 0     | 0    | 0.05  | 0.07 | 0.03  | 0.03 |
| 5                 | 0.92 | 0.07 | 0  | 0  | 0     | 0    | 0.05  | 0.07 | 0.03  | 0.03 |
| 6                 | 0.94 | 0.07 | 0  | 0  | 0     | 0    | 0.04  | 0.06 | 0.02  | 0.03 |
| 7                 | 0.95 | 0.06 | 0  | 0  | 0     | 0    | 0.02  | 0.05 | 0.02  | 0.03 |
| 8                 | 0.96 | 0.06 | 0  | 0  | 0     | 0    | 0.02  | 0.05 | 0.02  | 0.03 |
| 9                 | 0.96 | 0.06 | 0  | 0  | 0     | 0    | 0.02  | 0.05 | 0.02  | 0.03 |
| 10                | 0.96 | 0.06 | 0  | 0  | 0     | 0    | 0.02  | 0.05 | 0.02  | 0.03 |
| 11                | 0.97 | 0.05 | 0  | 0  | 0     | 0    | 0.02  | 0.05 | 0.02  | 0.03 |
| 12                | 0.96 | 0.05 | 0  | 0  | 0     | 0    | 0.02  | 0.05 | 0.02  | 0.03 |

**age=20 years, timing allo <6 months, cmv=D-/R-, donor=UD, graft=PBSC, TBI=TBI, In vivo Tcell depletion=yes,**

| Landmark time (y) | GRFS | se   | GF | se | AGVHD | se   | CGVHD | se   | Death | se   |
|-------------------|------|------|----|----|-------|------|-------|------|-------|------|
| 0                 | 0.81 | 0.09 | 0  | 0  | 0.02  | 0.02 | 0.08  | 0.08 | 0.09  | 0.05 |
| 1                 | 0.83 | 0.09 | 0  | 0  | 0.01  | 0.02 | 0.08  | 0.08 | 0.08  | 0.05 |
| 2                 | 0.83 | 0.1  | 0  | 0  | 0     | 0.01 | 0.09  | 0.09 | 0.07  | 0.05 |
| 3                 | 0.85 | 0.1  | 0  | 0  | 0     | 0    | 0.09  | 0.09 | 0.06  | 0.05 |
| 4                 | 0.88 | 0.1  | 0  | 0  | 0     | 0    | 0.07  | 0.09 | 0.05  | 0.05 |
| 5                 | 0.89 | 0.1  | 0  | 0  | 0     | 0    | 0.08  | 0.09 | 0.04  | 0.04 |
| 6                 | 0.91 | 0.09 | 0  | 0  | 0     | 0    | 0.06  | 0.08 | 0.03  | 0.04 |
| 7                 | 0.93 | 0.08 | 0  | 0  | 0     | 0    | 0.03  | 0.07 | 0.03  | 0.04 |
| 8                 | 0.94 | 0.08 | 0  | 0  | 0     | 0    | 0.03  | 0.07 | 0.03  | 0.04 |
| 9                 | 0.94 | 0.08 | 0  | 0  | 0     | 0    | 0.03  | 0.07 | 0.03  | 0.04 |
| 10                | 0.95 | 0.08 | 0  | 0  | 0     | 0    | 0.03  | 0.07 | 0.03  | 0.04 |
| 11                | 0.95 | 0.07 | 0  | 0  | 0     | 0    | 0.03  | 0.07 | 0.02  | 0.04 |
| 12                | 0.95 | 0.07 | 0  | 0  | 0     | 0    | 0.03  | 0.07 | 0.02  | 0.04 |

**age=30 years, timing allo <6 months, cmv=D-/R-, donor=UD, graft=PBSC, TBI=TBI, In vivo Tcell depletion=yes,**

| Landmark time (y) | GRFS | se   | GF | se | AGVHD | se   | CGVHD | se   | Death | se   |
|-------------------|------|------|----|----|-------|------|-------|------|-------|------|
| 0                 | 0.74 | 0.12 | 0  | 0  | 0.02  | 0.02 | 0.11  | 0.1  | 0.12  | 0.06 |
| 1                 | 0.76 | 0.12 | 0  | 0  | 0.02  | 0.02 | 0.11  | 0.1  | 0.11  | 0.07 |
| 2                 | 0.76 | 0.13 | 0  | 0  | 0     | 0.01 | 0.13  | 0.11 | 0.1   | 0.07 |
| 3                 | 0.79 | 0.13 | 0  | 0  | 0     | 0    | 0.12  | 0.12 | 0.09  | 0.07 |
| 4                 | 0.83 | 0.13 | 0  | 0  | 0     | 0    | 0.11  | 0.12 | 0.07  | 0.06 |
| 5                 | 0.84 | 0.13 | 0  | 0  | 0     | 0    | 0.11  | 0.12 | 0.05  | 0.06 |
| 6                 | 0.87 | 0.13 | 0  | 0  | 0     | 0    | 0.08  | 0.12 | 0.05  | 0.06 |
| 7                 | 0.91 | 0.11 | 0  | 0  | 0     | 0    | 0.05  | 0.1  | 0.04  | 0.06 |
| 8                 | 0.91 | 0.11 | 0  | 0  | 0     | 0    | 0.05  | 0.1  | 0.04  | 0.05 |



|    |      |      |   |   |   |   |      |      |      |      |
|----|------|------|---|---|---|---|------|------|------|------|
| 9  | 0.91 | 0.11 | 0 | 0 | 0 | 0 | 0.05 | 0.1  | 0.04 | 0.06 |
| 10 | 0.92 | 0.1  | 0 | 0 | 0 | 0 | 0.04 | 0.09 | 0.04 | 0.05 |
| 11 | 0.93 | 0.1  | 0 | 0 | 0 | 0 | 0.04 | 0.09 | 0.03 | 0.05 |
| 12 | 0.93 | 0.1  | 0 | 0 | 0 | 0 | 0.04 | 0.09 | 0.03 | 0.05 |

**age=40 years, timing allo <6 months, cmv=D-/R-, donor=UD, graft=PBSC, TBI=TBI, In vivo Tcell depletion=yes,**

| Landmark time (y) | GRFS | se   | GF | se | AGVHD | se   | CGVHD | se   | Death | se   |
|-------------------|------|------|----|----|-------|------|-------|------|-------|------|
| 0                 | 0.65 | 0.15 | 0  | 0  | 0.03  | 0.03 | 0.15  | 0.13 | 0.17  | 0.09 |
| 1                 | 0.67 | 0.15 | 0  | 0  | 0.03  | 0.03 | 0.16  | 0.14 | 0.15  | 0.09 |
| 2                 | 0.68 | 0.17 | 0  | 0  | 0     | 0.02 | 0.18  | 0.15 | 0.14  | 0.09 |
| 3                 | 0.7  | 0.17 | 0  | 0  | 0     | 0    | 0.17  | 0.16 | 0.12  | 0.09 |
| 4                 | 0.76 | 0.18 | 0  | 0  | 0     | 0    | 0.15  | 0.17 | 0.09  | 0.09 |
| 5                 | 0.77 | 0.18 | 0  | 0  | 0     | 0    | 0.15  | 0.17 | 0.07  | 0.08 |
| 6                 | 0.82 | 0.17 | 0  | 0  | 0     | 0    | 0.11  | 0.16 | 0.06  | 0.08 |
| 7                 | 0.87 | 0.16 | 0  | 0  | 0     | 0    | 0.07  | 0.14 | 0.06  | 0.08 |
| 8                 | 0.87 | 0.16 | 0  | 0  | 0     | 0    | 0.07  | 0.14 | 0.06  | 0.08 |
| 9                 | 0.87 | 0.16 | 0  | 0  | 0     | 0    | 0.07  | 0.14 | 0.06  | 0.08 |
| 10                | 0.89 | 0.15 | 0  | 0  | 0     | 0    | 0.06  | 0.13 | 0.05  | 0.08 |
| 11                | 0.9  | 0.15 | 0  | 0  | 0     | 0    | 0.06  | 0.13 | 0.05  | 0.07 |
| 12                | 0.9  | 0.15 | 0  | 0  | 0     | 0    | 0.06  | 0.13 | 0.05  | 0.07 |

**age=50 years, timing allo <6 months, cmv=D-/R-, donor=UD, graft=PBSC, TBI=TBI, In vivo Tcell depletion=yes,**

| Landmark time (y) | GRFS | se   | GF | se   | AGVHD | se   | CGVHD | se   | Death | se   |
|-------------------|------|------|----|------|-------|------|-------|------|-------|------|
| 0                 | 0.53 | 0.18 | 0  | 0    | 0.04  | 0.05 | 0.2   | 0.17 | 0.23  | 0.11 |
| 1                 | 0.55 | 0.19 | 0  | 0    | 0.04  | 0.05 | 0.21  | 0.18 | 0.2   | 0.12 |
| 2                 | 0.56 | 0.21 | 0  | 0    | 0.01  | 0.03 | 0.24  | 0.2  | 0.19  | 0.12 |
| 3                 | 0.6  | 0.22 | 0  | 0.01 | 0     | 0    | 0.23  | 0.21 | 0.17  | 0.12 |
| 4                 | 0.66 | 0.23 | 0  | 0    | 0     | 0    | 0.21  | 0.23 | 0.12  | 0.12 |
| 5                 | 0.68 | 0.24 | 0  | 0    | 0     | 0    | 0.22  | 0.23 | 0.1   | 0.11 |
| 6                 | 0.75 | 0.24 | 0  | 0    | 0     | 0    | 0.16  | 0.23 | 0.09  | 0.11 |
| 7                 | 0.81 | 0.22 | 0  | 0    | 0     | 0    | 0.1   | 0.21 | 0.09  | 0.11 |
| 8                 | 0.82 | 0.22 | 0  | 0    | 0     | 0    | 0.1   | 0.21 | 0.08  | 0.11 |
| 9                 | 0.82 | 0.23 | 0  | 0    | 0     | 0    | 0.1   | 0.21 | 0.08  | 0.11 |
| 10                | 0.84 | 0.21 | 0  | 0    | 0     | 0    | 0.08  | 0.19 | 0.07  | 0.11 |
| 11                | 0.85 | 0.21 | 0  | 0    | 0     | 0    | 0.08  | 0.19 | 0.07  | 0.1  |
| 12                | 0.85 | 0.21 | 0  | 0    | 0     | 0    | 0.08  | 0.2  | 0.07  | 0.11 |

**age=10 years, timing allo >6 months, cmv=others, donor=UD, graft=PBSC, TBI=TBI, In vivo Tcell depletion=yes,**

| Landmark time (y) | GRFS | se   | GF   | se   | AGVHD | se   | CGVHD | se   | Death | se   |
|-------------------|------|------|------|------|-------|------|-------|------|-------|------|
| 0                 | 0.89 | 0.04 | 0.02 | 0.02 | 0.01  | 0.01 | 0.02  | 0.02 | 0.06  | 0.03 |
| 1                 | 0.9  | 0.04 | 0.02 | 0.02 | 0.01  | 0.01 | 0.02  | 0.02 | 0.05  | 0.03 |
| 2                 | 0.91 | 0.04 | 0.01 | 0.02 | 0     | 0.01 | 0.02  | 0.02 | 0.05  | 0.04 |
| 3                 | 0.92 | 0.04 | 0.01 | 0.02 | 0     | 0    | 0.02  | 0.02 | 0.04  | 0.03 |
| 4                 | 0.94 | 0.04 | 0.01 | 0.01 | 0     | 0    | 0.02  | 0.02 | 0.03  | 0.03 |

|    |      |      |      |      |   |   |      |      |      |      |
|----|------|------|------|------|---|---|------|------|------|------|
| 5  | 0.95 | 0.04 | 0.01 | 0.01 | 0 | 0 | 0.02 | 0.02 | 0.03 | 0.03 |
| 6  | 0.96 | 0.04 | 0.01 | 0.01 | 0 | 0 | 0.01 | 0.02 | 0.02 | 0.03 |
| 7  | 0.97 | 0.03 | 0.01 | 0.01 | 0 | 0 | 0.01 | 0.02 | 0.02 | 0.03 |
| 8  | 0.97 | 0.03 | 0.01 | 0.01 | 0 | 0 | 0.01 | 0.02 | 0.02 | 0.03 |
| 9  | 0.97 | 0.03 | 0.01 | 0.01 | 0 | 0 | 0.01 | 0.02 | 0.02 | 0.03 |
| 10 | 0.97 | 0.03 | 0.01 | 0.01 | 0 | 0 | 0.01 | 0.02 | 0.02 | 0.03 |
| 11 | 0.97 | 0.03 | 0.01 | 0.01 | 0 | 0 | 0.01 | 0.02 | 0.02 | 0.02 |
| 12 | 0.97 | 0.03 | 0    | 0.01 | 0 | 0 | 0.01 | 0.02 | 0.02 | 0.03 |

**age=20 years, timing allo >6 months, cmv=others, donor=UD, graft=PBSC, TBI=TBI, In vivo Tcell depletion=yes,**

| Landmark time (y) | GRFS | se   | GF   | se   | AGVHD | se   | CGVHD | se   | Death | se   |
|-------------------|------|------|------|------|-------|------|-------|------|-------|------|
| 0                 | 0.85 | 0.05 | 0.02 | 0.02 | 0.02  | 0.02 | 0.03  | 0.03 | 0.09  | 0.04 |
| 1                 | 0.87 | 0.05 | 0.02 | 0.02 | 0.01  | 0.02 | 0.03  | 0.03 | 0.07  | 0.04 |
| 2                 | 0.88 | 0.05 | 0.01 | 0.02 | 0     | 0.01 | 0.03  | 0.03 | 0.07  | 0.04 |
| 3                 | 0.89 | 0.05 | 0.01 | 0.02 | 0     | 0    | 0.03  | 0.03 | 0.06  | 0.04 |
| 4                 | 0.92 | 0.05 | 0.01 | 0.01 | 0     | 0    | 0.03  | 0.03 | 0.05  | 0.04 |
| 5                 | 0.93 | 0.05 | 0.01 | 0.01 | 0     | 0    | 0.03  | 0.03 | 0.04  | 0.04 |
| 6                 | 0.94 | 0.05 | 0.01 | 0.01 | 0     | 0    | 0.02  | 0.03 | 0.03  | 0.04 |
| 7                 | 0.95 | 0.04 | 0.01 | 0.01 | 0     | 0    | 0.01  | 0.02 | 0.03  | 0.03 |
| 8                 | 0.96 | 0.04 | 0.01 | 0.01 | 0     | 0    | 0.01  | 0.02 | 0.03  | 0.03 |
| 9                 | 0.95 | 0.04 | 0.01 | 0.01 | 0     | 0    | 0.01  | 0.02 | 0.03  | 0.03 |
| 10                | 0.96 | 0.04 | 0.01 | 0.01 | 0     | 0    | 0.01  | 0.02 | 0.02  | 0.03 |
| 11                | 0.96 | 0.04 | 0.01 | 0.01 | 0     | 0    | 0.01  | 0.02 | 0.02  | 0.03 |
| 12                | 0.96 | 0.04 | 0    | 0.01 | 0     | 0    | 0.01  | 0.02 | 0.02  | 0.03 |

**age=30 years, timing allo >6 months, cmv=others, donor=UD, graft=PBSC, TBI=TBI, In vivo Tcell depletion=yes,**

| Landmark time (y) | GRFS | se   | GF   | se   | AGVHD | se   | CGVHD | se   | Death | se   |
|-------------------|------|------|------|------|-------|------|-------|------|-------|------|
| 0                 | 0.8  | 0.06 | 0.02 | 0.02 | 0.02  | 0.02 | 0.04  | 0.03 | 0.12  | 0.05 |
| 1                 | 0.82 | 0.07 | 0.02 | 0.02 | 0.02  | 0.02 | 0.04  | 0.03 | 0.11  | 0.05 |
| 2                 | 0.83 | 0.07 | 0.02 | 0.02 | 0     | 0.01 | 0.05  | 0.04 | 0.1   | 0.06 |
| 3                 | 0.85 | 0.07 | 0.02 | 0.02 | 0     | 0    | 0.04  | 0.04 | 0.09  | 0.05 |
| 4                 | 0.89 | 0.06 | 0.01 | 0.01 | 0     | 0    | 0.04  | 0.04 | 0.07  | 0.05 |
| 5                 | 0.9  | 0.06 | 0.01 | 0.01 | 0     | 0    | 0.04  | 0.04 | 0.05  | 0.05 |
| 6                 | 0.92 | 0.06 | 0.01 | 0.01 | 0     | 0    | 0.03  | 0.04 | 0.05  | 0.05 |
| 7                 | 0.93 | 0.05 | 0.01 | 0.01 | 0     | 0    | 0.02  | 0.03 | 0.04  | 0.04 |
| 8                 | 0.94 | 0.05 | 0.01 | 0.01 | 0     | 0    | 0.02  | 0.03 | 0.04  | 0.04 |
| 9                 | 0.94 | 0.06 | 0.01 | 0.01 | 0     | 0    | 0.02  | 0.03 | 0.04  | 0.04 |
| 10                | 0.94 | 0.05 | 0.01 | 0.01 | 0     | 0    | 0.01  | 0.03 | 0.04  | 0.04 |
| 11                | 0.95 | 0.05 | 0.01 | 0.01 | 0     | 0    | 0.01  | 0.03 | 0.03  | 0.04 |
| 12                | 0.95 | 0.05 | 0.01 | 0.01 | 0     | 0    | 0.01  | 0.03 | 0.03  | 0.04 |

**age=40 years, timing allo >6 months, cmv=others, donor=UD, graft=PBSC, TBI=TBI, In vivo Tcell depletion=yes,**

| Landmark time (y) | GRFS | se   | GF   | se   | AGVHD | se   | CGVHD | se   | Death | se   |
|-------------------|------|------|------|------|-------|------|-------|------|-------|------|
| 0                 | 0.72 | 0.08 | 0.02 | 0.02 | 0.03  | 0.03 | 0.05  | 0.04 | 0.17  | 0.07 |

|    |      |      |      |      |      |      |      |      |      |      |
|----|------|------|------|------|------|------|------|------|------|------|
| 1  | 0.75 | 0.08 | 0.02 | 0.02 | 0.03 | 0.03 | 0.06 | 0.04 | 0.15 | 0.07 |
| 2  | 0.77 | 0.08 | 0.02 | 0.02 | 0    | 0.01 | 0.06 | 0.05 | 0.14 | 0.07 |
| 3  | 0.8  | 0.08 | 0.02 | 0.02 | 0    | 0    | 0.06 | 0.05 | 0.12 | 0.07 |
| 4  | 0.84 | 0.08 | 0.01 | 0.02 | 0    | 0    | 0.06 | 0.05 | 0.09 | 0.07 |
| 5  | 0.86 | 0.08 | 0.01 | 0.01 | 0    | 0    | 0.06 | 0.05 | 0.07 | 0.06 |
| 6  | 0.89 | 0.08 | 0.01 | 0.01 | 0    | 0    | 0.04 | 0.05 | 0.06 | 0.06 |
| 7  | 0.91 | 0.07 | 0.01 | 0.01 | 0    | 0    | 0.02 | 0.04 | 0.06 | 0.06 |
| 8  | 0.91 | 0.07 | 0.01 | 0.01 | 0    | 0    | 0.03 | 0.04 | 0.05 | 0.06 |
| 9  | 0.91 | 0.07 | 0.01 | 0.02 | 0    | 0    | 0.03 | 0.04 | 0.06 | 0.06 |
| 10 | 0.92 | 0.07 | 0.01 | 0.01 | 0    | 0    | 0.02 | 0.04 | 0.05 | 0.06 |
| 11 | 0.93 | 0.07 | 0.01 | 0.01 | 0    | 0    | 0.02 | 0.04 | 0.05 | 0.05 |
| 12 | 0.93 | 0.07 | 0.01 | 0.01 | 0    | 0    | 0.02 | 0.04 | 0.05 | 0.06 |

**age=50 years, timing allo >6 months, cmv=others, donor=UD, graft=PBSC, TBI=TBI, In vivo Tcell depletion=yes,**

| Landmark time (y) | GRFS | se   | GF   | se   | AGVHD | se   | CGVHD | se   | Death | se   |
|-------------------|------|------|------|------|-------|------|-------|------|-------|------|
| 0                 | 0.63 | 0.09 | 0.02 | 0.02 | 0.04  | 0.04 | 0.07  | 0.05 | 0.23  | 0.08 |
| 1                 | 0.66 | 0.1  | 0.02 | 0.02 | 0.04  | 0.04 | 0.08  | 0.05 | 0.2   | 0.08 |
| 2                 | 0.69 | 0.1  | 0.02 | 0.02 | 0.01  | 0.02 | 0.09  | 0.06 | 0.2   | 0.09 |
| 3                 | 0.72 | 0.1  | 0.02 | 0.02 | 0     | 0    | 0.09  | 0.06 | 0.17  | 0.09 |
| 4                 | 0.78 | 0.1  | 0.01 | 0.02 | 0     | 0    | 0.08  | 0.07 | 0.13  | 0.09 |
| 5                 | 0.81 | 0.1  | 0.01 | 0.02 | 0     | 0    | 0.08  | 0.07 | 0.1   | 0.08 |
| 6                 | 0.84 | 0.1  | 0.01 | 0.02 | 0     | 0    | 0.06  | 0.07 | 0.09  | 0.08 |
| 7                 | 0.87 | 0.09 | 0.01 | 0.02 | 0     | 0    | 0.04  | 0.06 | 0.09  | 0.08 |
| 8                 | 0.88 | 0.09 | 0.01 | 0.02 | 0     | 0    | 0.04  | 0.06 | 0.08  | 0.08 |
| 9                 | 0.87 | 0.1  | 0.01 | 0.02 | 0     | 0    | 0.04  | 0.06 | 0.08  | 0.08 |
| 10                | 0.89 | 0.09 | 0.01 | 0.02 | 0     | 0    | 0.03  | 0.05 | 0.07  | 0.08 |
| 11                | 0.9  | 0.09 | 0.01 | 0.02 | 0     | 0    | 0.03  | 0.05 | 0.07  | 0.07 |
| 12                | 0.9  | 0.09 | 0.01 | 0.01 | 0     | 0    | 0.03  | 0.05 | 0.07  | 0.07 |

**age=10 years, timing allo <6 months, cmv=others, donor=UD, graft=PBSC, TBI=TBI, In vivo Tcell depletion=yes,**

| Landmark time (y) | GRFS | se   | GF   | se   | AGVHD | se   | CGVHD | se   | Death | se   |
|-------------------|------|------|------|------|-------|------|-------|------|-------|------|
| 0                 | 0.87 | 0.06 | 0.01 | 0.01 | 0.02  | 0.02 | 0.04  | 0.05 | 0.05  | 0.03 |
| 1                 | 0.88 | 0.06 | 0.01 | 0.01 | 0.02  | 0.02 | 0.04  | 0.05 | 0.04  | 0.03 |
| 2                 | 0.89 | 0.06 | 0.01 | 0.01 | 0     | 0.01 | 0.05  | 0.05 | 0.04  | 0.03 |
| 3                 | 0.9  | 0.06 | 0.01 | 0.01 | 0     | 0    | 0.05  | 0.05 | 0.04  | 0.03 |
| 4                 | 0.92 | 0.06 | 0.01 | 0.01 | 0     | 0    | 0.04  | 0.05 | 0.03  | 0.03 |
| 5                 | 0.93 | 0.06 | 0.01 | 0.01 | 0     | 0    | 0.04  | 0.05 | 0.02  | 0.03 |
| 6                 | 0.95 | 0.06 | 0.01 | 0.01 | 0     | 0    | 0.03  | 0.05 | 0.02  | 0.03 |
| 7                 | 0.96 | 0.05 | 0.01 | 0.01 | 0     | 0    | 0.02  | 0.04 | 0.02  | 0.03 |
| 8                 | 0.96 | 0.05 | 0.01 | 0.01 | 0     | 0    | 0.02  | 0.04 | 0.02  | 0.02 |
| 9                 | 0.96 | 0.05 | 0.01 | 0.01 | 0     | 0    | 0.02  | 0.04 | 0.02  | 0.03 |
| 10                | 0.97 | 0.05 | 0    | 0.01 | 0     | 0    | 0.01  | 0.04 | 0.01  | 0.02 |
| 11                | 0.97 | 0.05 | 0    | 0.01 | 0     | 0    | 0.01  | 0.04 | 0.01  | 0.02 |
| 12                | 0.97 | 0.05 | 0    | 0.01 | 0     | 0    | 0.01  | 0.04 | 0.01  | 0.02 |

**age=20 years, timing allo <6 months, cmv=others, donor=UD, graft=PBSC, TBI=TBI, In vivo Tcell depletion=yes,**

| Landmark time (y) | GRFS | se   | GF   | se   | AGVHD | se   | CGVHD | se   | Death | se   |
|-------------------|------|------|------|------|-------|------|-------|------|-------|------|
| 0                 | 0.82 | 0.08 | 0.02 | 0.01 | 0.03  | 0.03 | 0.06  | 0.06 | 0.07  | 0.04 |
| 1                 | 0.83 | 0.08 | 0.02 | 0.01 | 0.03  | 0.03 | 0.06  | 0.06 | 0.06  | 0.04 |
| 2                 | 0.85 | 0.08 | 0.01 | 0.01 | 0     | 0.02 | 0.07  | 0.07 | 0.06  | 0.04 |
| 3                 | 0.86 | 0.08 | 0.01 | 0.02 | 0     | 0    | 0.07  | 0.07 | 0.05  | 0.04 |
| 4                 | 0.89 | 0.08 | 0.01 | 0.01 | 0     | 0    | 0.06  | 0.07 | 0.04  | 0.04 |
| 5                 | 0.9  | 0.08 | 0.01 | 0.01 | 0     | 0    | 0.06  | 0.07 | 0.03  | 0.04 |
| 6                 | 0.92 | 0.07 | 0.01 | 0.01 | 0     | 0    | 0.04  | 0.07 | 0.03  | 0.03 |
| 7                 | 0.94 | 0.07 | 0.01 | 0.01 | 0     | 0    | 0.03  | 0.06 | 0.03  | 0.03 |
| 8                 | 0.94 | 0.07 | 0.01 | 0.01 | 0     | 0    | 0.03  | 0.06 | 0.02  | 0.03 |
| 9                 | 0.94 | 0.07 | 0.01 | 0.01 | 0     | 0    | 0.03  | 0.06 | 0.02  | 0.03 |
| 10                | 0.95 | 0.06 | 0.01 | 0.01 | 0     | 0    | 0.02  | 0.05 | 0.02  | 0.03 |
| 11                | 0.95 | 0.06 | 0.01 | 0.01 | 0     | 0    | 0.02  | 0.05 | 0.02  | 0.03 |
| 12                | 0.96 | 0.06 | 0    | 0.01 | 0     | 0    | 0.02  | 0.05 | 0.02  | 0.03 |

**age=30 years, timing allo <6 months, cmv=others, donor=UD, graft=PBSC, TBI=TBI, In vivo Tcell depletion=yes,**

| Landmark time (y) | GRFS | se   | GF   | se   | AGVHD | se   | CGVHD | se   | Death | se   |
|-------------------|------|------|------|------|-------|------|-------|------|-------|------|
| 0                 | 0.75 | 0.1  | 0.02 | 0.02 | 0.04  | 0.04 | 0.09  | 0.08 | 0.1   | 0.05 |
| 1                 | 0.77 | 0.1  | 0.02 | 0.02 | 0.04  | 0.04 | 0.09  | 0.08 | 0.09  | 0.05 |
| 2                 | 0.79 | 0.1  | 0.01 | 0.02 | 0.01  | 0.02 | 0.1   | 0.09 | 0.09  | 0.06 |
| 3                 | 0.81 | 0.1  | 0.01 | 0.02 | 0     | 0    | 0.1   | 0.09 | 0.08  | 0.06 |
| 4                 | 0.85 | 0.1  | 0.01 | 0.01 | 0     | 0    | 0.09  | 0.09 | 0.06  | 0.05 |
| 5                 | 0.86 | 0.1  | 0.01 | 0.01 | 0     | 0    | 0.09  | 0.1  | 0.04  | 0.05 |
| 6                 | 0.89 | 0.1  | 0.01 | 0.01 | 0     | 0    | 0.06  | 0.09 | 0.04  | 0.05 |
| 7                 | 0.92 | 0.09 | 0.01 | 0.01 | 0     | 0    | 0.04  | 0.08 | 0.04  | 0.05 |
| 8                 | 0.92 | 0.09 | 0.01 | 0.01 | 0     | 0    | 0.04  | 0.08 | 0.03  | 0.04 |
| 9                 | 0.92 | 0.09 | 0.01 | 0.01 | 0     | 0    | 0.04  | 0.08 | 0.03  | 0.05 |
| 10                | 0.93 | 0.08 | 0.01 | 0.01 | 0     | 0    | 0.03  | 0.07 | 0.03  | 0.04 |
| 11                | 0.94 | 0.08 | 0.01 | 0.01 | 0     | 0    | 0.03  | 0.07 | 0.03  | 0.04 |
| 12                | 0.94 | 0.08 | 0    | 0.01 | 0     | 0    | 0.03  | 0.07 | 0.03  | 0.04 |

**age=40 years, timing allo <6 months, cmv=others, donor=UD, graft=PBSC, TBI=TBI, In vivo Tcell depletion=yes,**

| Landmark time (y) | GRFS | se   | GF   | se   | AGVHD | se   | CGVHD | se   | Death | se   |
|-------------------|------|------|------|------|-------|------|-------|------|-------|------|
| 0                 | 0.66 | 0.12 | 0.02 | 0.02 | 0.06  | 0.05 | 0.12  | 0.1  | 0.14  | 0.07 |
| 1                 | 0.69 | 0.13 | 0.02 | 0.02 | 0.05  | 0.05 | 0.12  | 0.1  | 0.12  | 0.07 |
| 2                 | 0.71 | 0.13 | 0.01 | 0.02 | 0.01  | 0.03 | 0.14  | 0.12 | 0.12  | 0.07 |
| 3                 | 0.74 | 0.14 | 0.02 | 0.02 | 0     | 0    | 0.14  | 0.12 | 0.11  | 0.07 |
| 4                 | 0.79 | 0.14 | 0.01 | 0.02 | 0     | 0    | 0.12  | 0.13 | 0.08  | 0.07 |
| 5                 | 0.81 | 0.14 | 0.01 | 0.01 | 0     | 0    | 0.13  | 0.13 | 0.06  | 0.07 |
| 6                 | 0.85 | 0.14 | 0.01 | 0.01 | 0     | 0    | 0.09  | 0.12 | 0.05  | 0.06 |
| 7                 | 0.88 | 0.12 | 0.01 | 0.01 | 0     | 0    | 0.06  | 0.11 | 0.05  | 0.06 |
| 8                 | 0.89 | 0.12 | 0.01 | 0.01 | 0     | 0    | 0.06  | 0.11 | 0.05  | 0.06 |

|    |      |      |      |      |   |   |      |      |      |      |
|----|------|------|------|------|---|---|------|------|------|------|
| 9  | 0.89 | 0.12 | 0.01 | 0.02 | 0 | 0 | 0.06 | 0.11 | 0.05 | 0.06 |
| 10 | 0.91 | 0.11 | 0.01 | 0.01 | 0 | 0 | 0.04 | 0.1  | 0.04 | 0.06 |
| 11 | 0.91 | 0.11 | 0.01 | 0.01 | 0 | 0 | 0.04 | 0.1  | 0.04 | 0.06 |
| 12 | 0.91 | 0.11 | 0.01 | 0.01 | 0 | 0 | 0.04 | 0.1  | 0.04 | 0.06 |

**age=50 years, timing allo <6 months, cmv=others, donor=UD, graft=PBSC, TBI=TBI, In vivo Tcell depletion=yes,**

| Landmark time (y) | GRFS | se   | GF   | se   | AGVHD | se   | CGVHD | se   | Death | se   |
|-------------------|------|------|------|------|-------|------|-------|------|-------|------|
| 0                 | 0.55 | 0.15 | 0.02 | 0.02 | 0.08  | 0.07 | 0.16  | 0.13 | 0.19  | 0.09 |
| 1                 | 0.58 | 0.16 | 0.02 | 0.02 | 0.07  | 0.07 | 0.17  | 0.14 | 0.16  | 0.09 |
| 2                 | 0.61 | 0.17 | 0.02 | 0.02 | 0.01  | 0.04 | 0.2   | 0.16 | 0.16  | 0.1  |
| 3                 | 0.65 | 0.18 | 0.02 | 0.02 | 0     | 0    | 0.19  | 0.16 | 0.14  | 0.1  |
| 4                 | 0.71 | 0.19 | 0.01 | 0.02 | 0     | 0    | 0.17  | 0.17 | 0.11  | 0.1  |
| 5                 | 0.73 | 0.19 | 0.01 | 0.02 | 0     | 0    | 0.18  | 0.18 | 0.08  | 0.09 |
| 6                 | 0.78 | 0.19 | 0.01 | 0.02 | 0     | 0    | 0.13  | 0.18 | 0.08  | 0.09 |
| 7                 | 0.84 | 0.17 | 0.01 | 0.02 | 0     | 0    | 0.08  | 0.15 | 0.07  | 0.09 |
| 8                 | 0.84 | 0.17 | 0.01 | 0.02 | 0     | 0    | 0.08  | 0.15 | 0.07  | 0.09 |
| 9                 | 0.84 | 0.17 | 0.01 | 0.02 | 0     | 0    | 0.08  | 0.16 | 0.07  | 0.09 |
| 10                | 0.87 | 0.16 | 0.01 | 0.02 | 0     | 0    | 0.06  | 0.14 | 0.06  | 0.09 |
| 11                | 0.87 | 0.16 | 0.01 | 0.02 | 0     | 0    | 0.06  | 0.14 | 0.06  | 0.08 |
| 12                | 0.87 | 0.16 | 0.01 | 0.02 | 0     | 0    | 0.07  | 0.15 | 0.06  | 0.09 |
